# Supplementary material for: One-pot build-up procedure for the synthesis of variously substituted purine derivatives
Source: Royal Society of Chemistry journal article supplement (doi:10.1039/c2ra20842c), 2012-01-01

## Supplementary information

### **One-pot build-up procedure for the synthesis of variously substituted purine derivatives**

**Milan Dejmek, Soňa Kovačková, Eva Zborníková, Hubert Hřebabecký, Michal Šála, Martin Dračínský and Radim Nencka\***

*Gilead Sciences & IOCB Research Centre, Institute of Organic Chemistry and Biochemistry  
Academy of Sciences of the Czech Republic, v.v.i., Flemingovo nám. 2, 166 10 Prague 6,  
Czech Republic*

#### **Table of contents**

|                                                                         |     |
|-------------------------------------------------------------------------|-----|
| Copies of $^1\text{H}$ NMR $^{13}\text{C}$ NMR spectra of new compounds | S2  |
| GCMS analyses of known compounds                                        | S73 |

Table 1, Entry 3

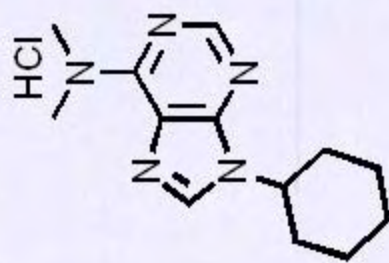

Dejmek\_MD327  
1H NMR in DMSO  
1-11-11 DR  
\*\*\*\*\*

NAME Dejmek\_MD32  
EXPNO 1  
PROCNO 1  
Date\_ 20111101  
Time\_ 12.17  
INSTRUM spect  
PROBHD 5 mm TXI 1H-  
PULPROG zg30  
TD 60094  
SOLVENT DMSO  
NS 32  
DS 0  
SWH 7507.507 Hz  
FIDRES 0.124929 Hz  
AQ 4.0023770 sec  
RG 14.3  
DW 66.600 usec  
DE 6.00 usec  
TE 300.0 K  
D1 1.00000000 sec  
TD0 1

===== CHANNEL f1 =  
NUC1 1H  
P1 8.00 usec  
PL1 0.00 dB  
PL1W 8.54041386 V  
SFO1 499.9534997 M  
SI 131072  
SF 499.9499978 MF-  
WDW no  
SSB 0  
LB 0.00 Hz  
GB 0  
PC 1.00

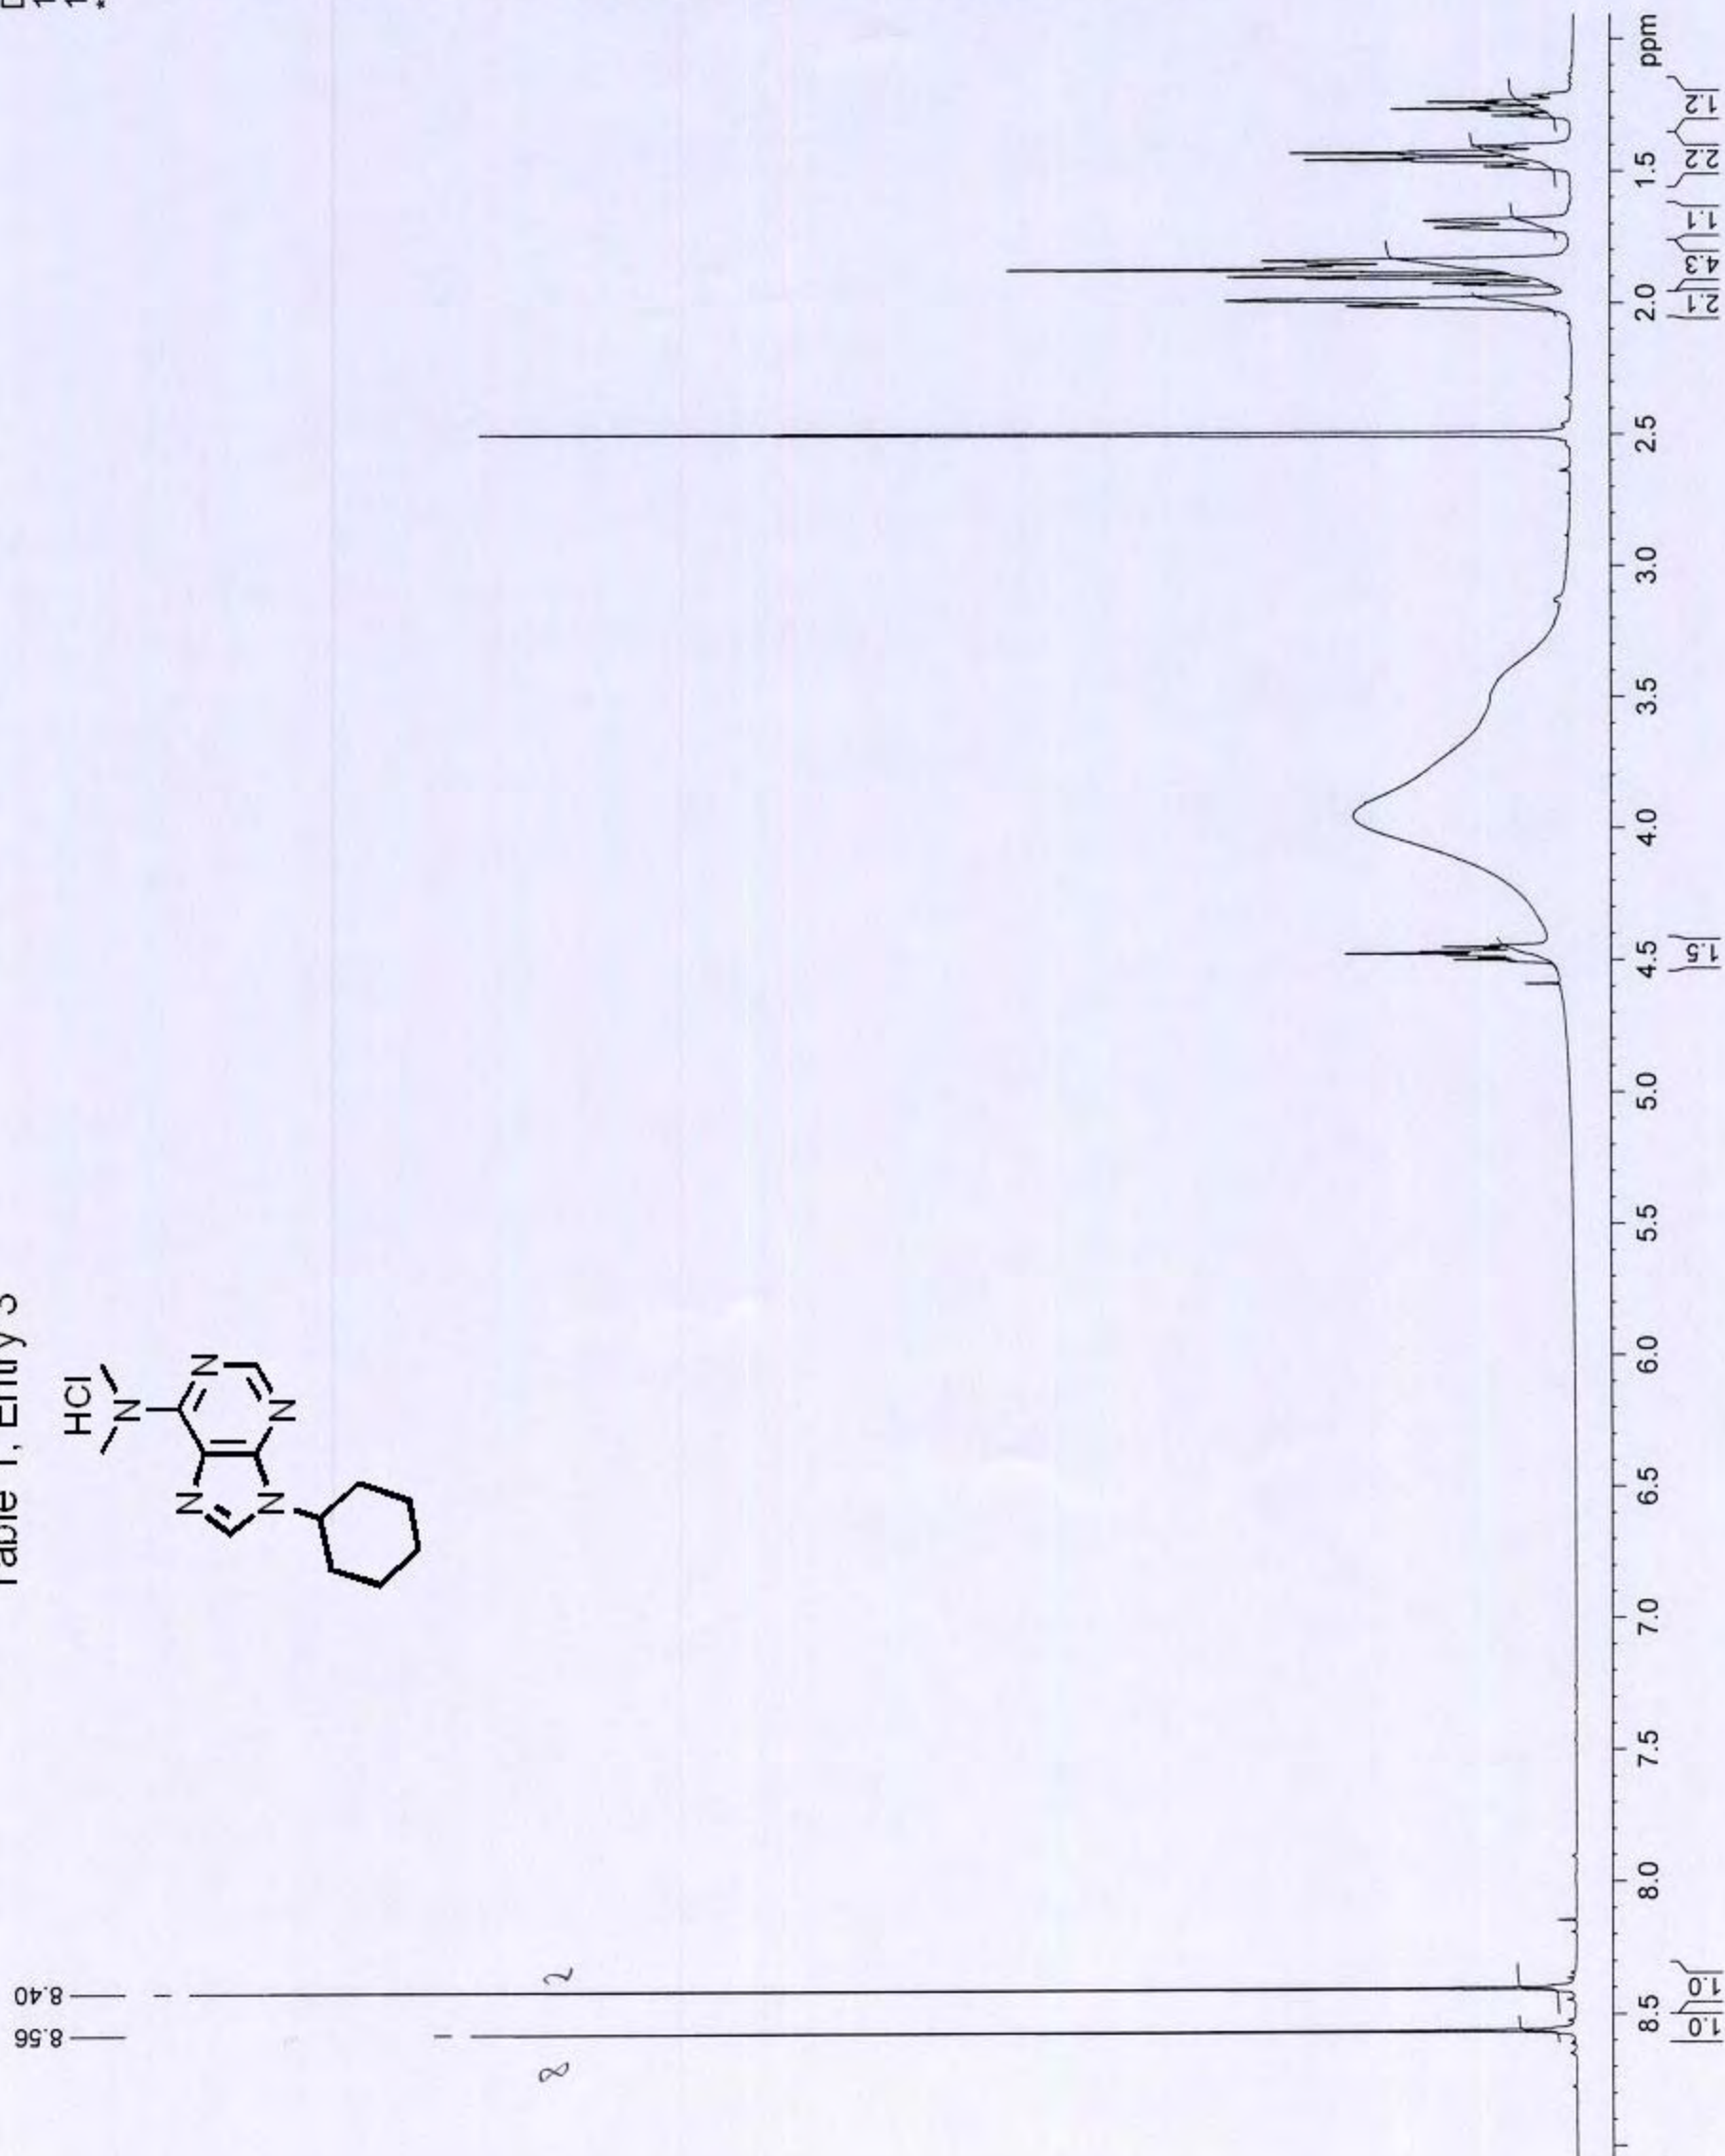

Table 1, Entry 3

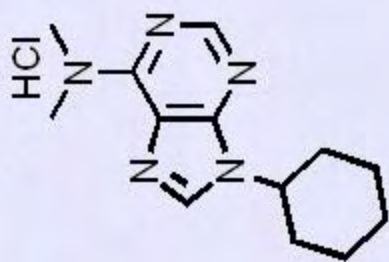

Dejmek\_MD327  
APT in DMSO  
1-11-11 DR  
\*\*\*\*\*

NAME Dejmek\_MD327  
EXPNO 2  
PROCNO 1  
Date\_ 20111101  
Time 13.24  
INSTRUM spect  
PROBHD 5 mm TXI 1H-13  
PULPROG jmod  
TD 65536  
SOLVENT DMSO  
NS 1279  
DS 4  
SWH 30030.029 Hz  
FIDRES 0.458222 Hz  
AQ 1.0912410 sec  
RG 29193  
DW 16.650 usec  
DE 6.50 usec  
TE 300.0 K  
CNST2 165.0000000  
CNST11 1.0000000  
D1 2.00000000 sec  
D20 0.00606061 sec  
TD0 1

==== CHANNEL f1 =====  
NUC1 13C  
P1 14.75 usec  
P2 29.50 usec  
PL1 0.00 dB  
PL1W 67.82093048 W  
SFO1 125.7263554 MHz  
==== CHANNEL f2 =====  
CPDPRG2 waltz16  
NUC2 1H  
PCPD2 60.00 usec  
PL2 0.00 dB  
PL12 17.50 dB  
PL2W 8.54041386 W  
PL12W 0.15187243 W  
SFO2 499.9519998 MHz  
SI 131072  
SF 125.7125590 MHz  
WDW EM  
SSB 0  
LB 1.00 Hz  
GB 0  
PC 1.00

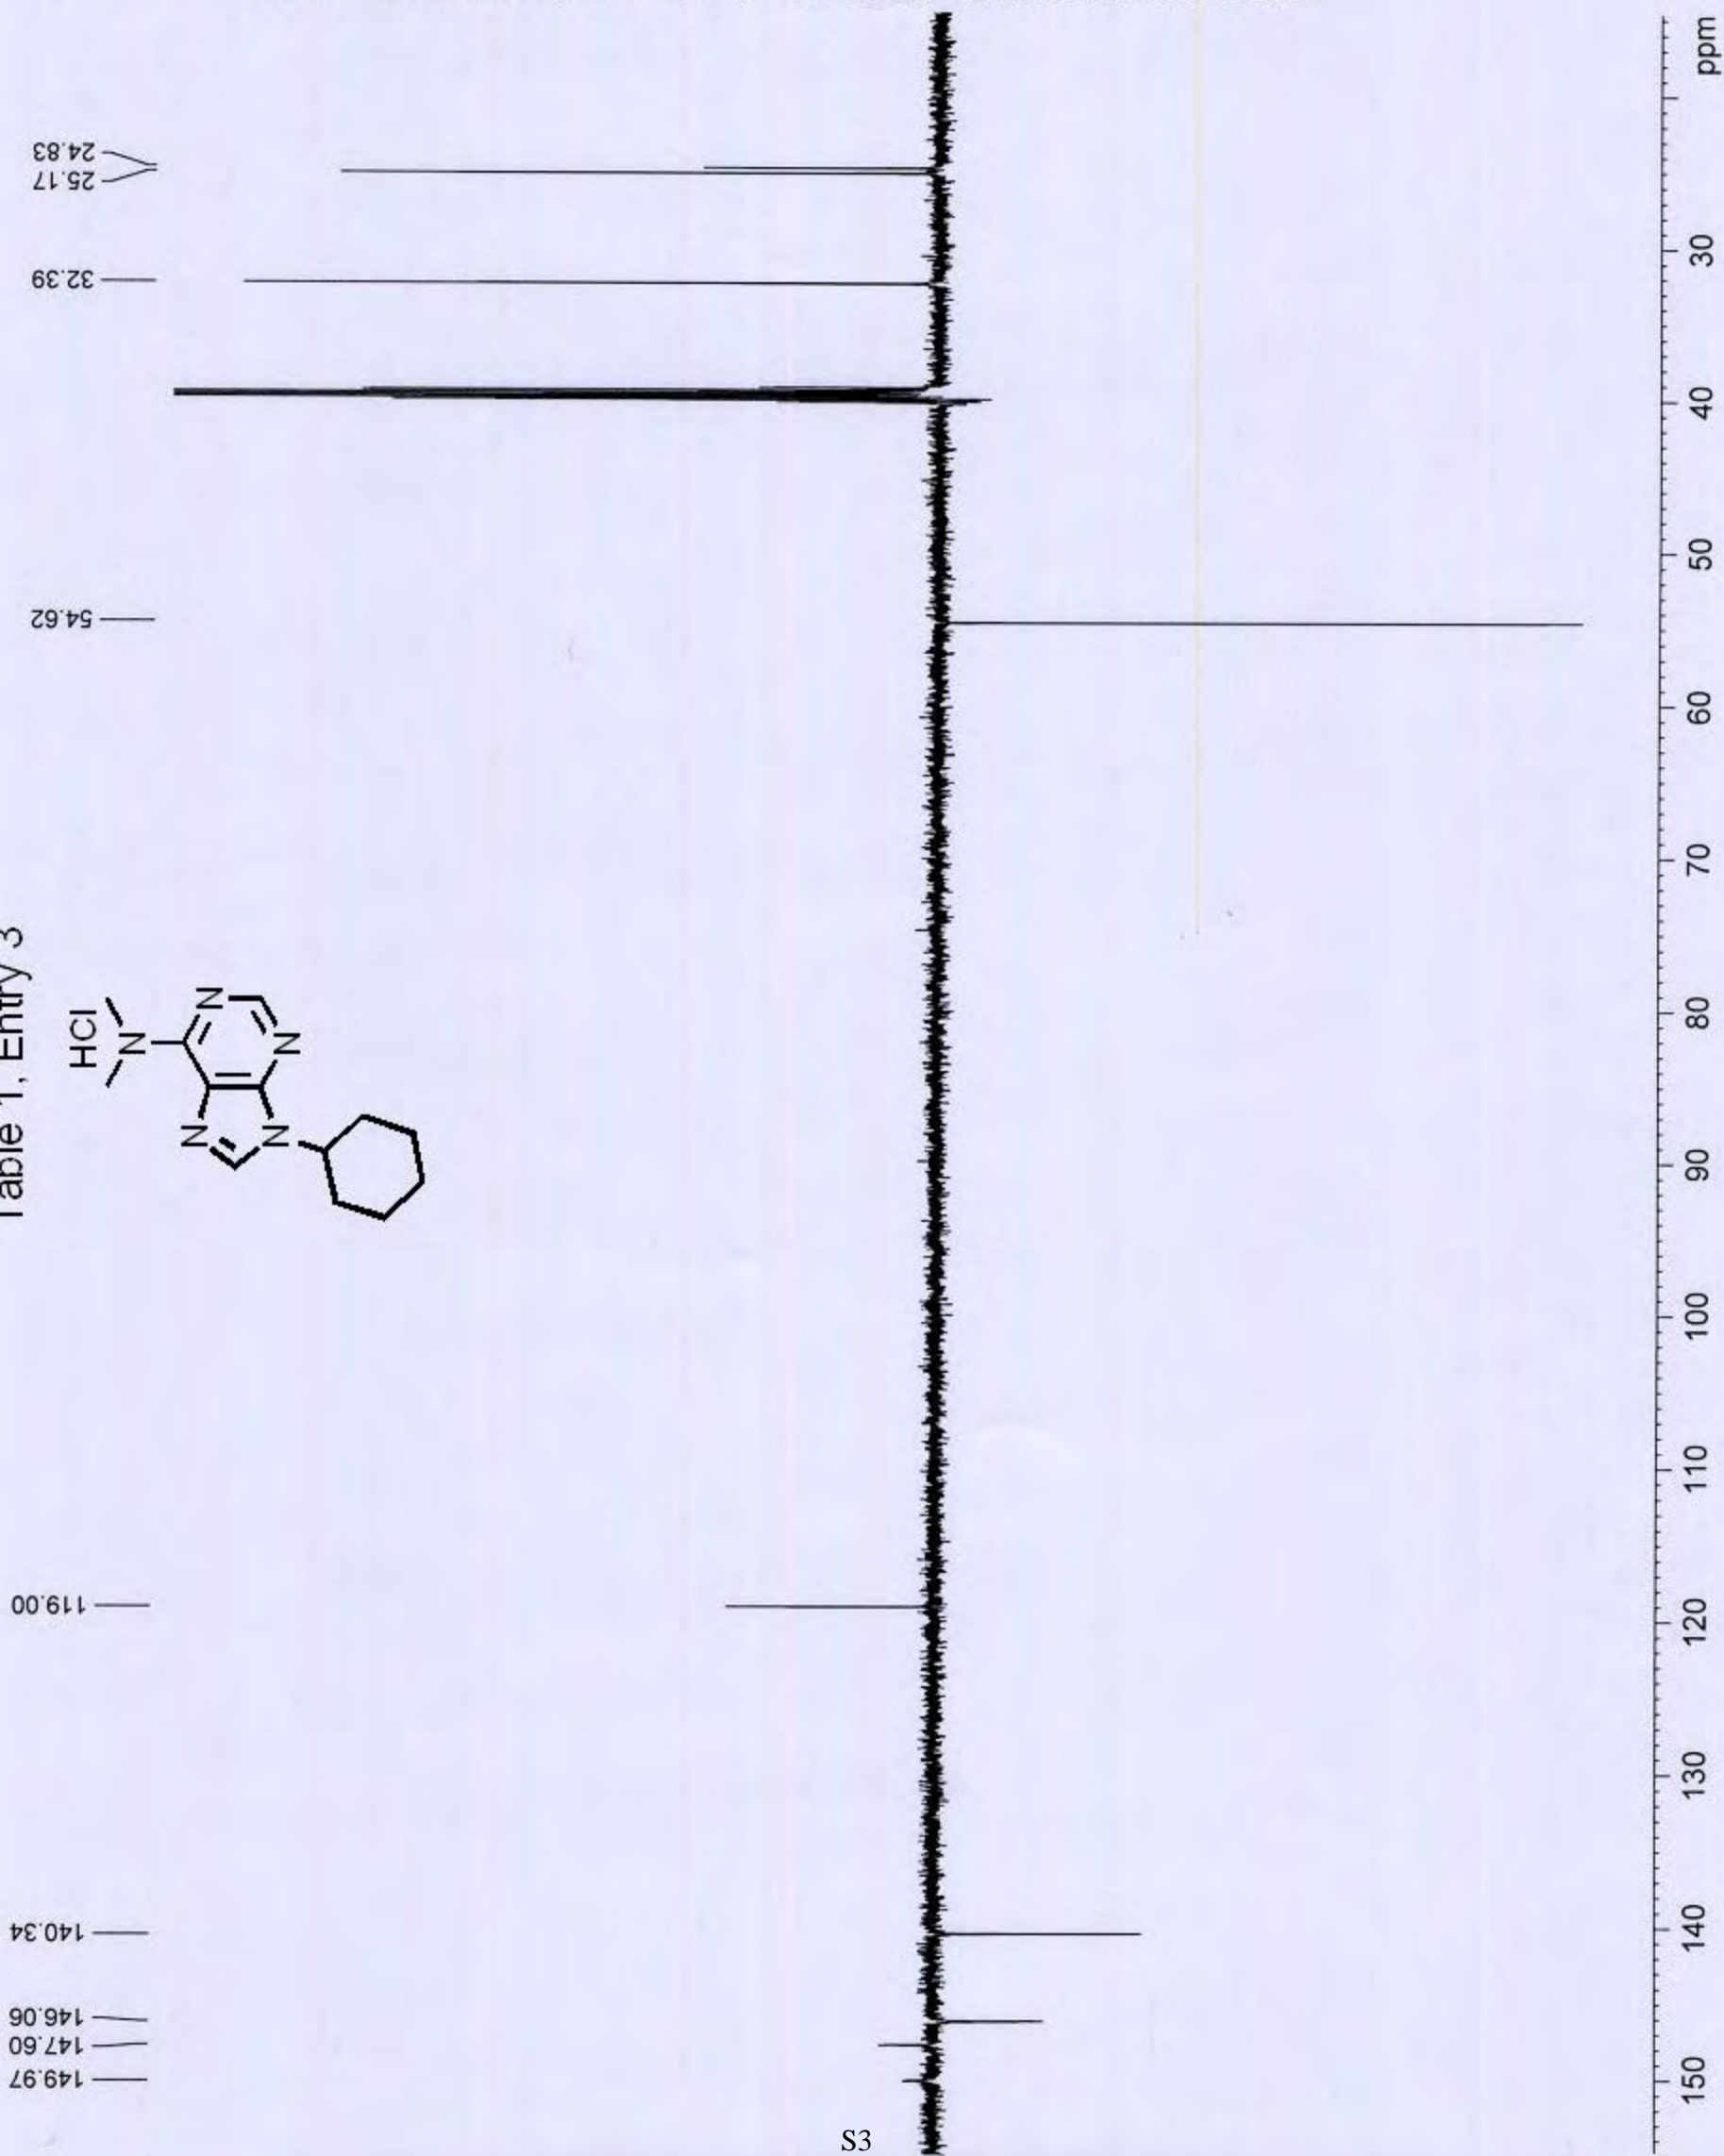

Table 1, Entry 11

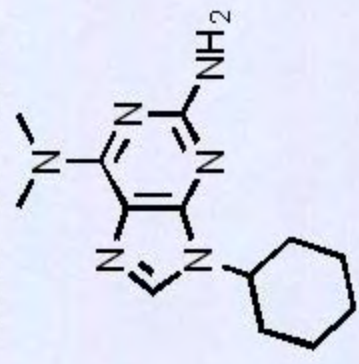

— 5.77

— 7.80

— 8.23

Dejmek\_MD328  
1H-NMR in DMSO  
8.9.2011 DR  
\*\*\*\*\*

NAME Dejmek\_MD328  
EXPNO 1  
PROCNO 1  
Date\_ 20110908  
Time 9.51  
INSTRUM spect  
PROBHD 5 mm CPTCI 1H-  
PULPROG zg30  
TD 72114  
SOLVENT DMSO  
NS 32  
DS 0  
SWH 9014.423 Hz  
FIDRES 0.125002 Hz  
AQ 3.9999733 sec  
RG 9  
DW 55.467 usec  
DE 20.00 usec  
TE 300.0 K  
D1 1.00000000 sec  
TD0 1

==== CHANNEL f1 =====  
NUC1 1H  
P1 10.00 usec  
PL1 8.10 dB  
PL1W 5.29101372 W  
SFO1 600.1330006 MHz  
SI 131072  
SF 600.1300065 MHz  
WDW no  
SSB 0  
LB 0.00 Hz  
GB 0  
PC 0.50

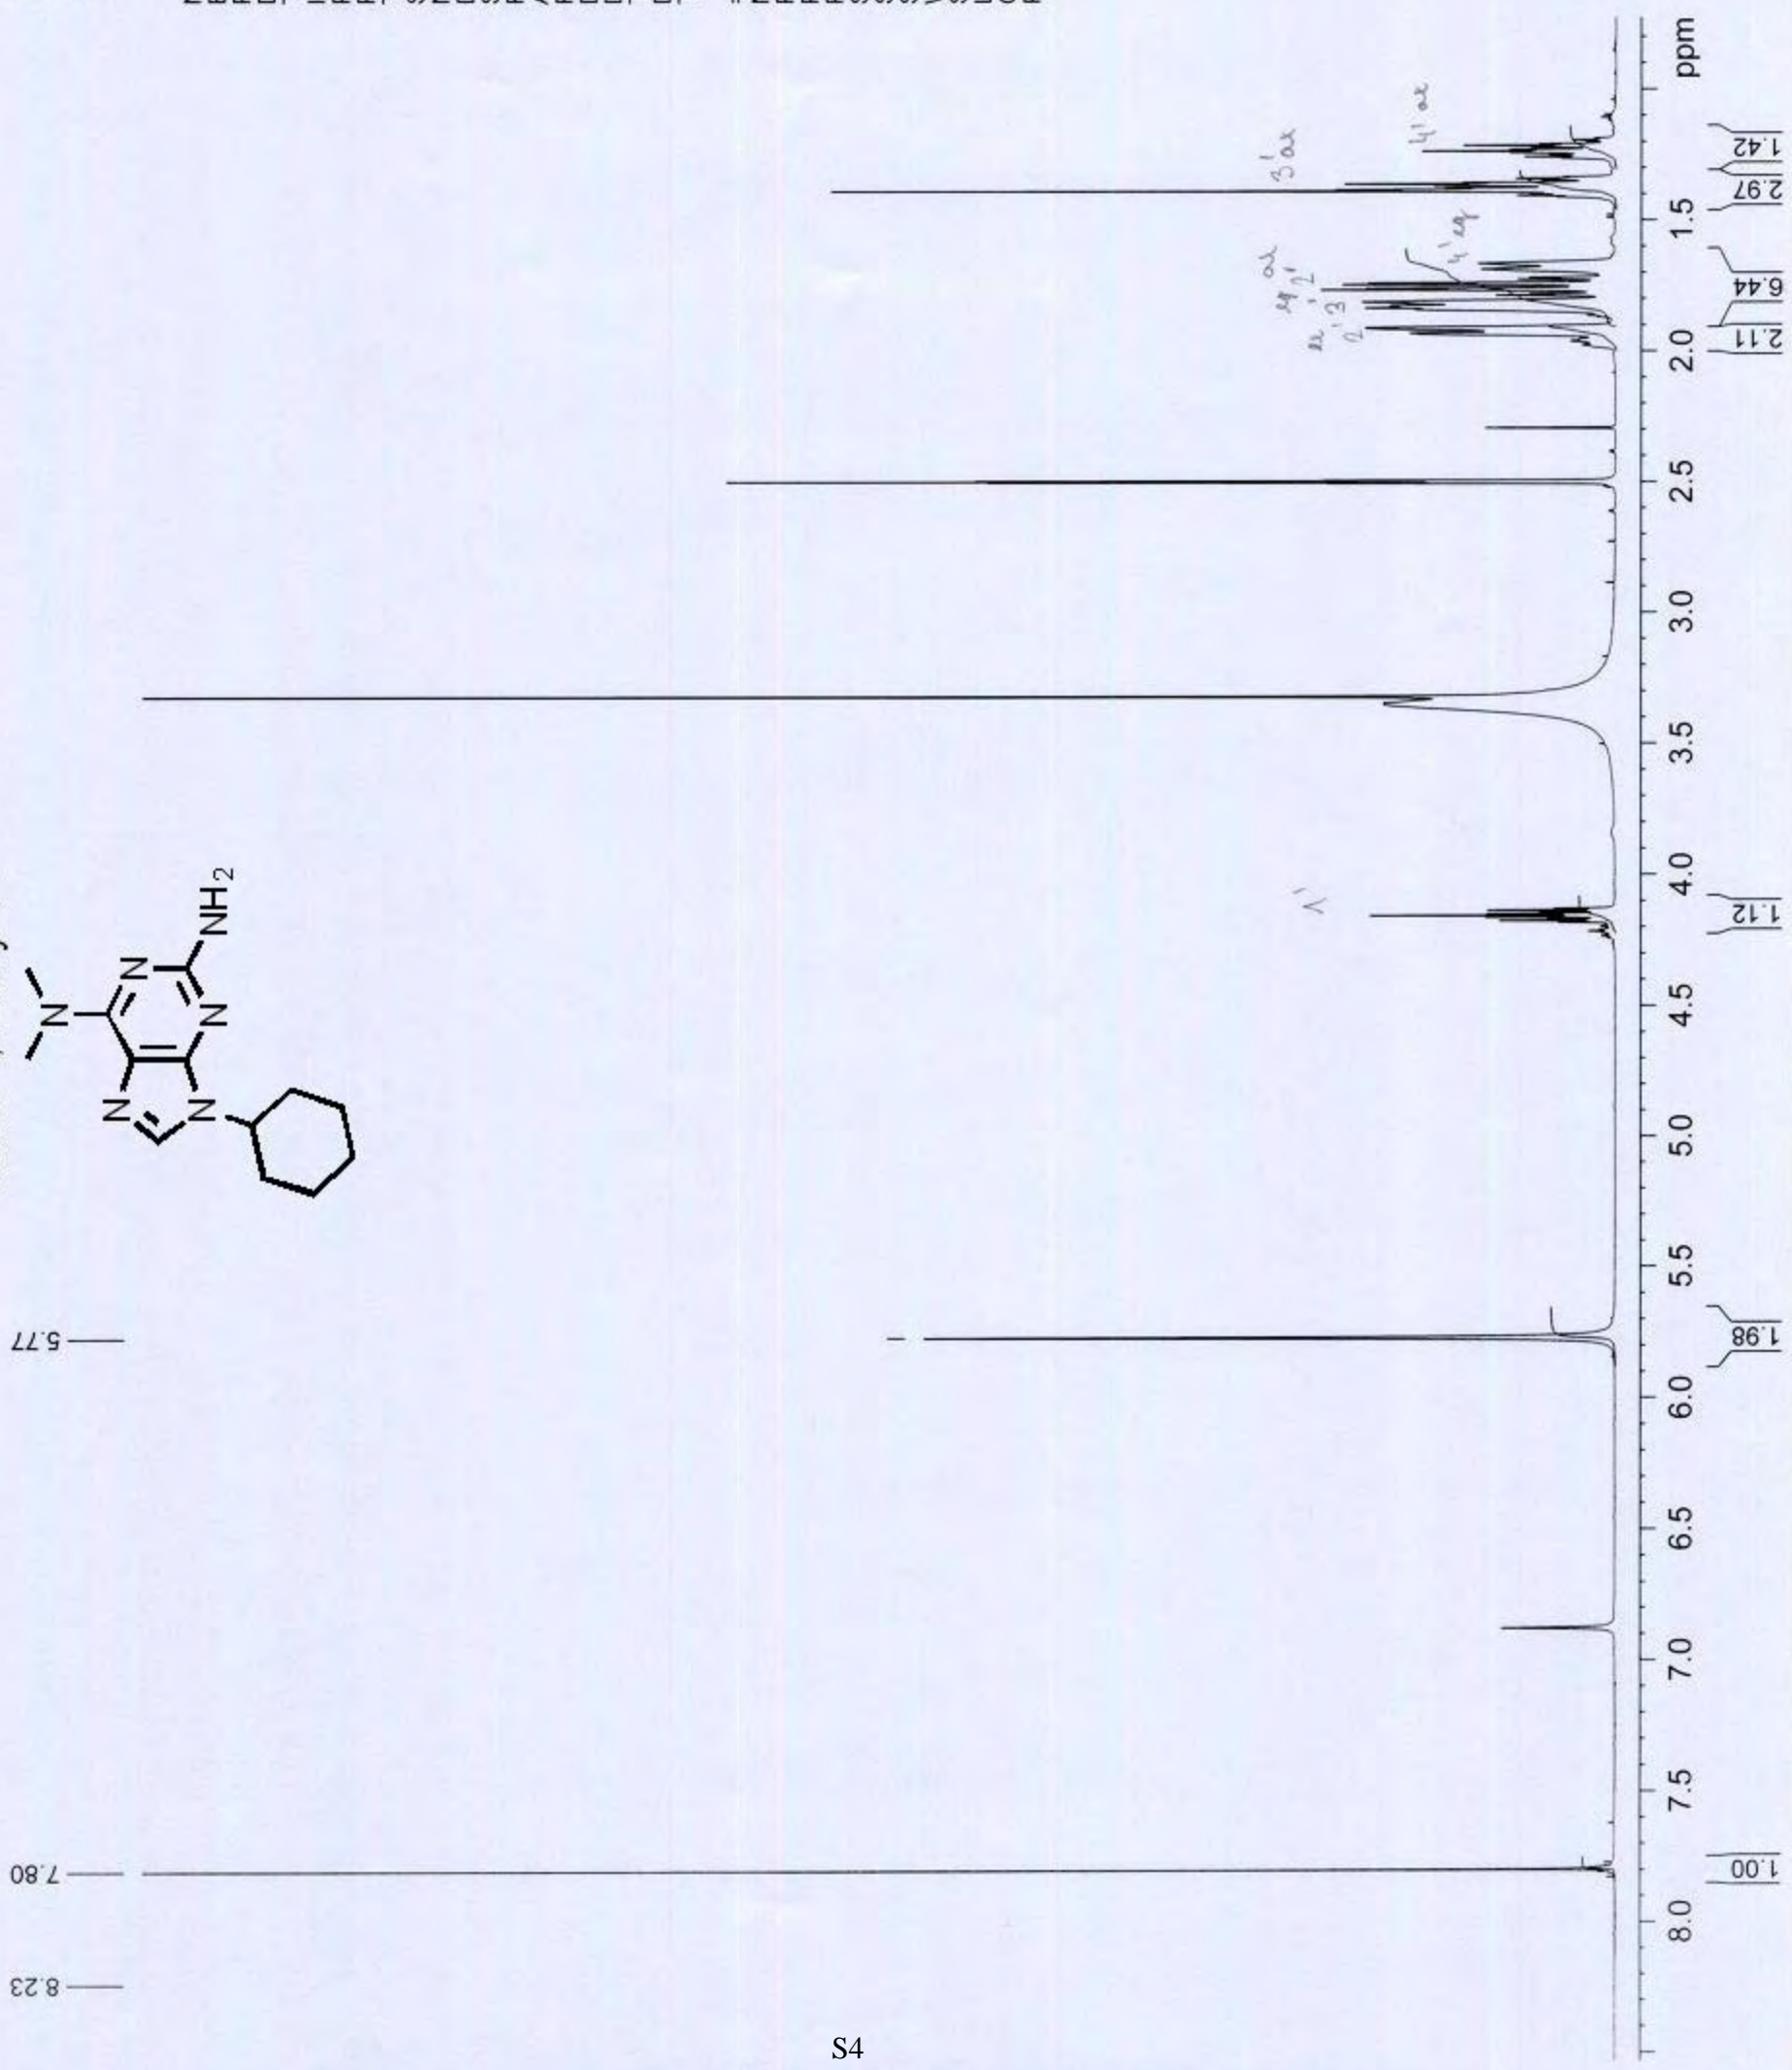

Table 1, Entry 11

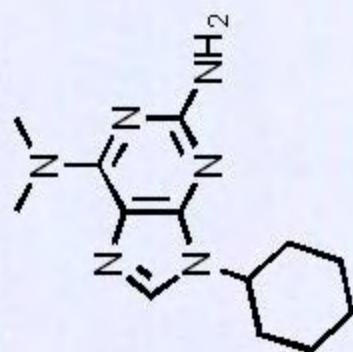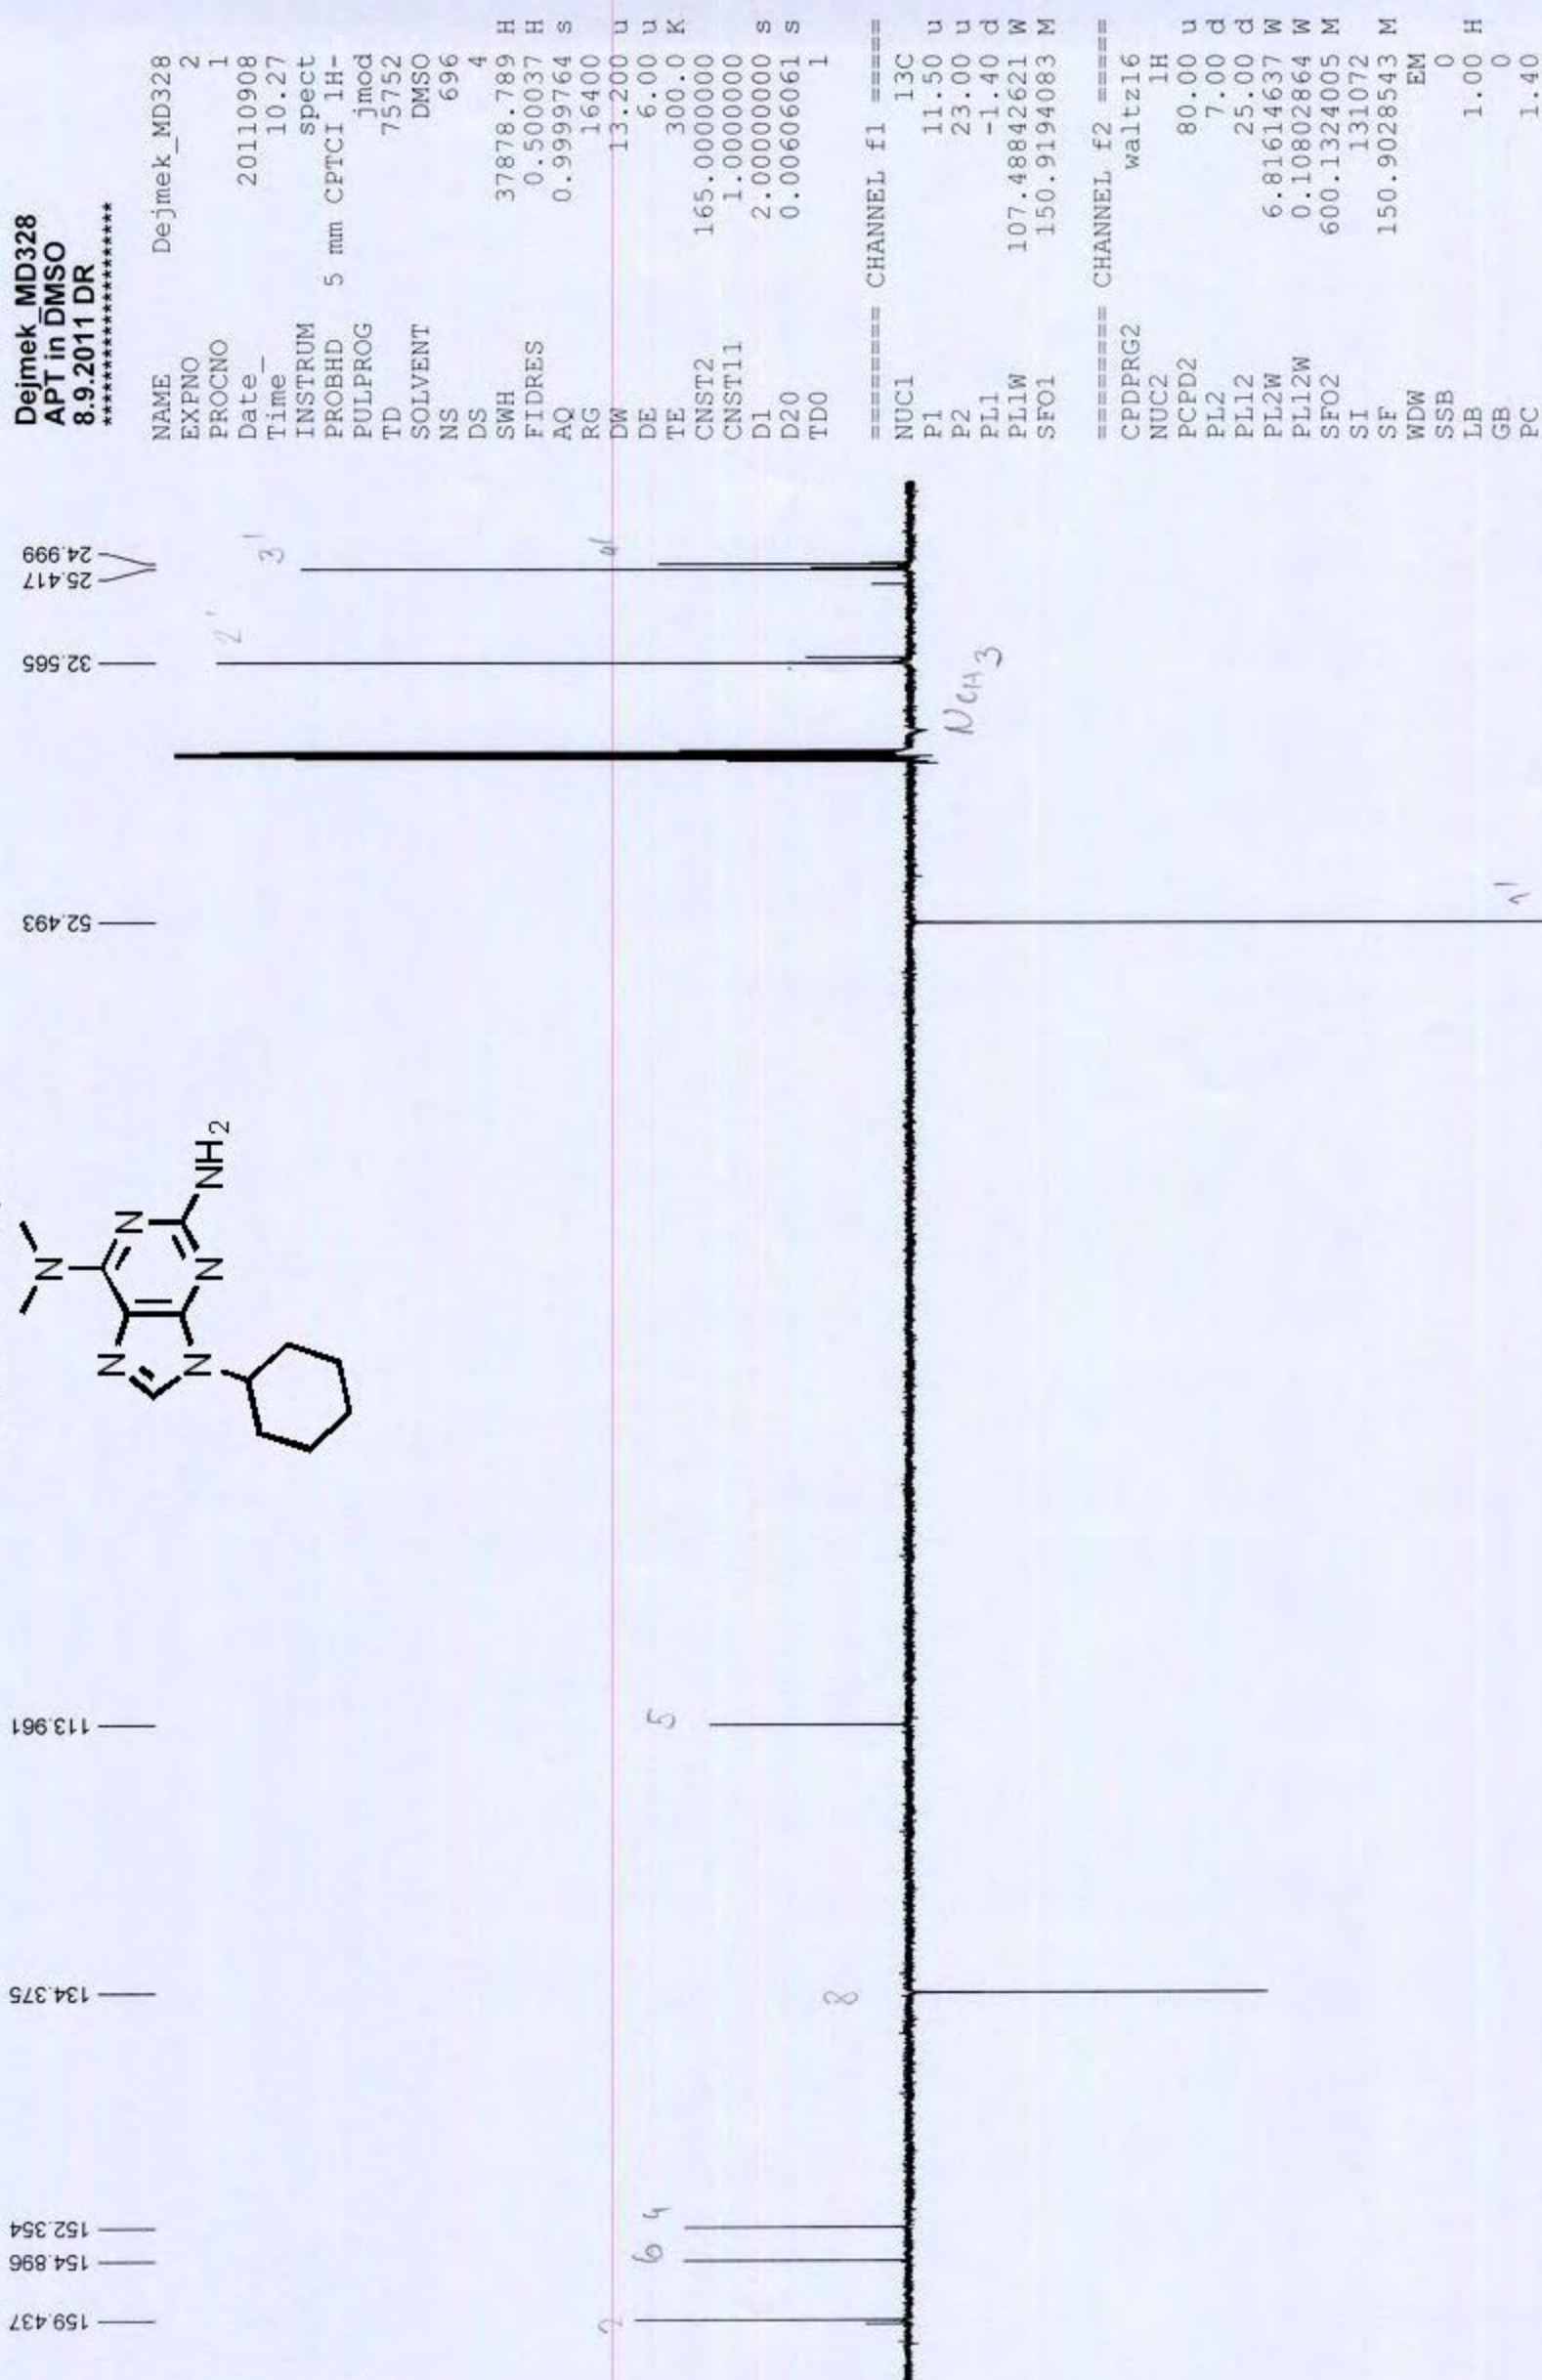

Dejmek\_MD381  
1H NMR in DMSO  
7-12-11 DR  
\*\*\*\*\*

Current Data Parameters  
NAME Dejmek\_MD381  
EXPNO 1  
PROCNO 1  
F2 - Acquisition Parameters  
Date\_ 20111207  
Time 14.28  
INSTRUM spect  
PROBHD 5 mm TXI 1H-13  
PULPROG zg30  
TD 65536  
SOLVENT DMSO  
NS 32  
DS 0  
SWH 7507.507 Hz  
FIDRES 0.124929 Hz  
AQ 4.0023770 sec  
RG 14.3  
DN 66.600 usec  
DE 6.00 usec  
TE 300.0 K  
D1 1.00000000 sec  
TD0 1  
CHANNEL f1  
NUC1 1H  
P1 8.00 usec  
PL1 0.00 dB  
PL1W 8.54041386 W  
SFO1 499.9534997 MHz  
F2 - Processing parameters  
SI 131072  
SF 499.9499959 MHz  
WDW nc  
SSB 0  
LB 0.00 Hz  
GB 0  
PC 1.00

Table 2, Entry 3, Z = H

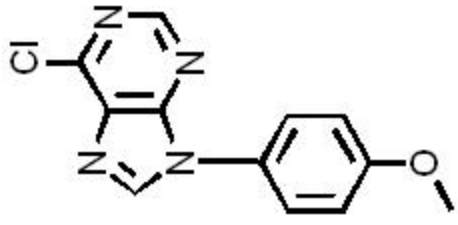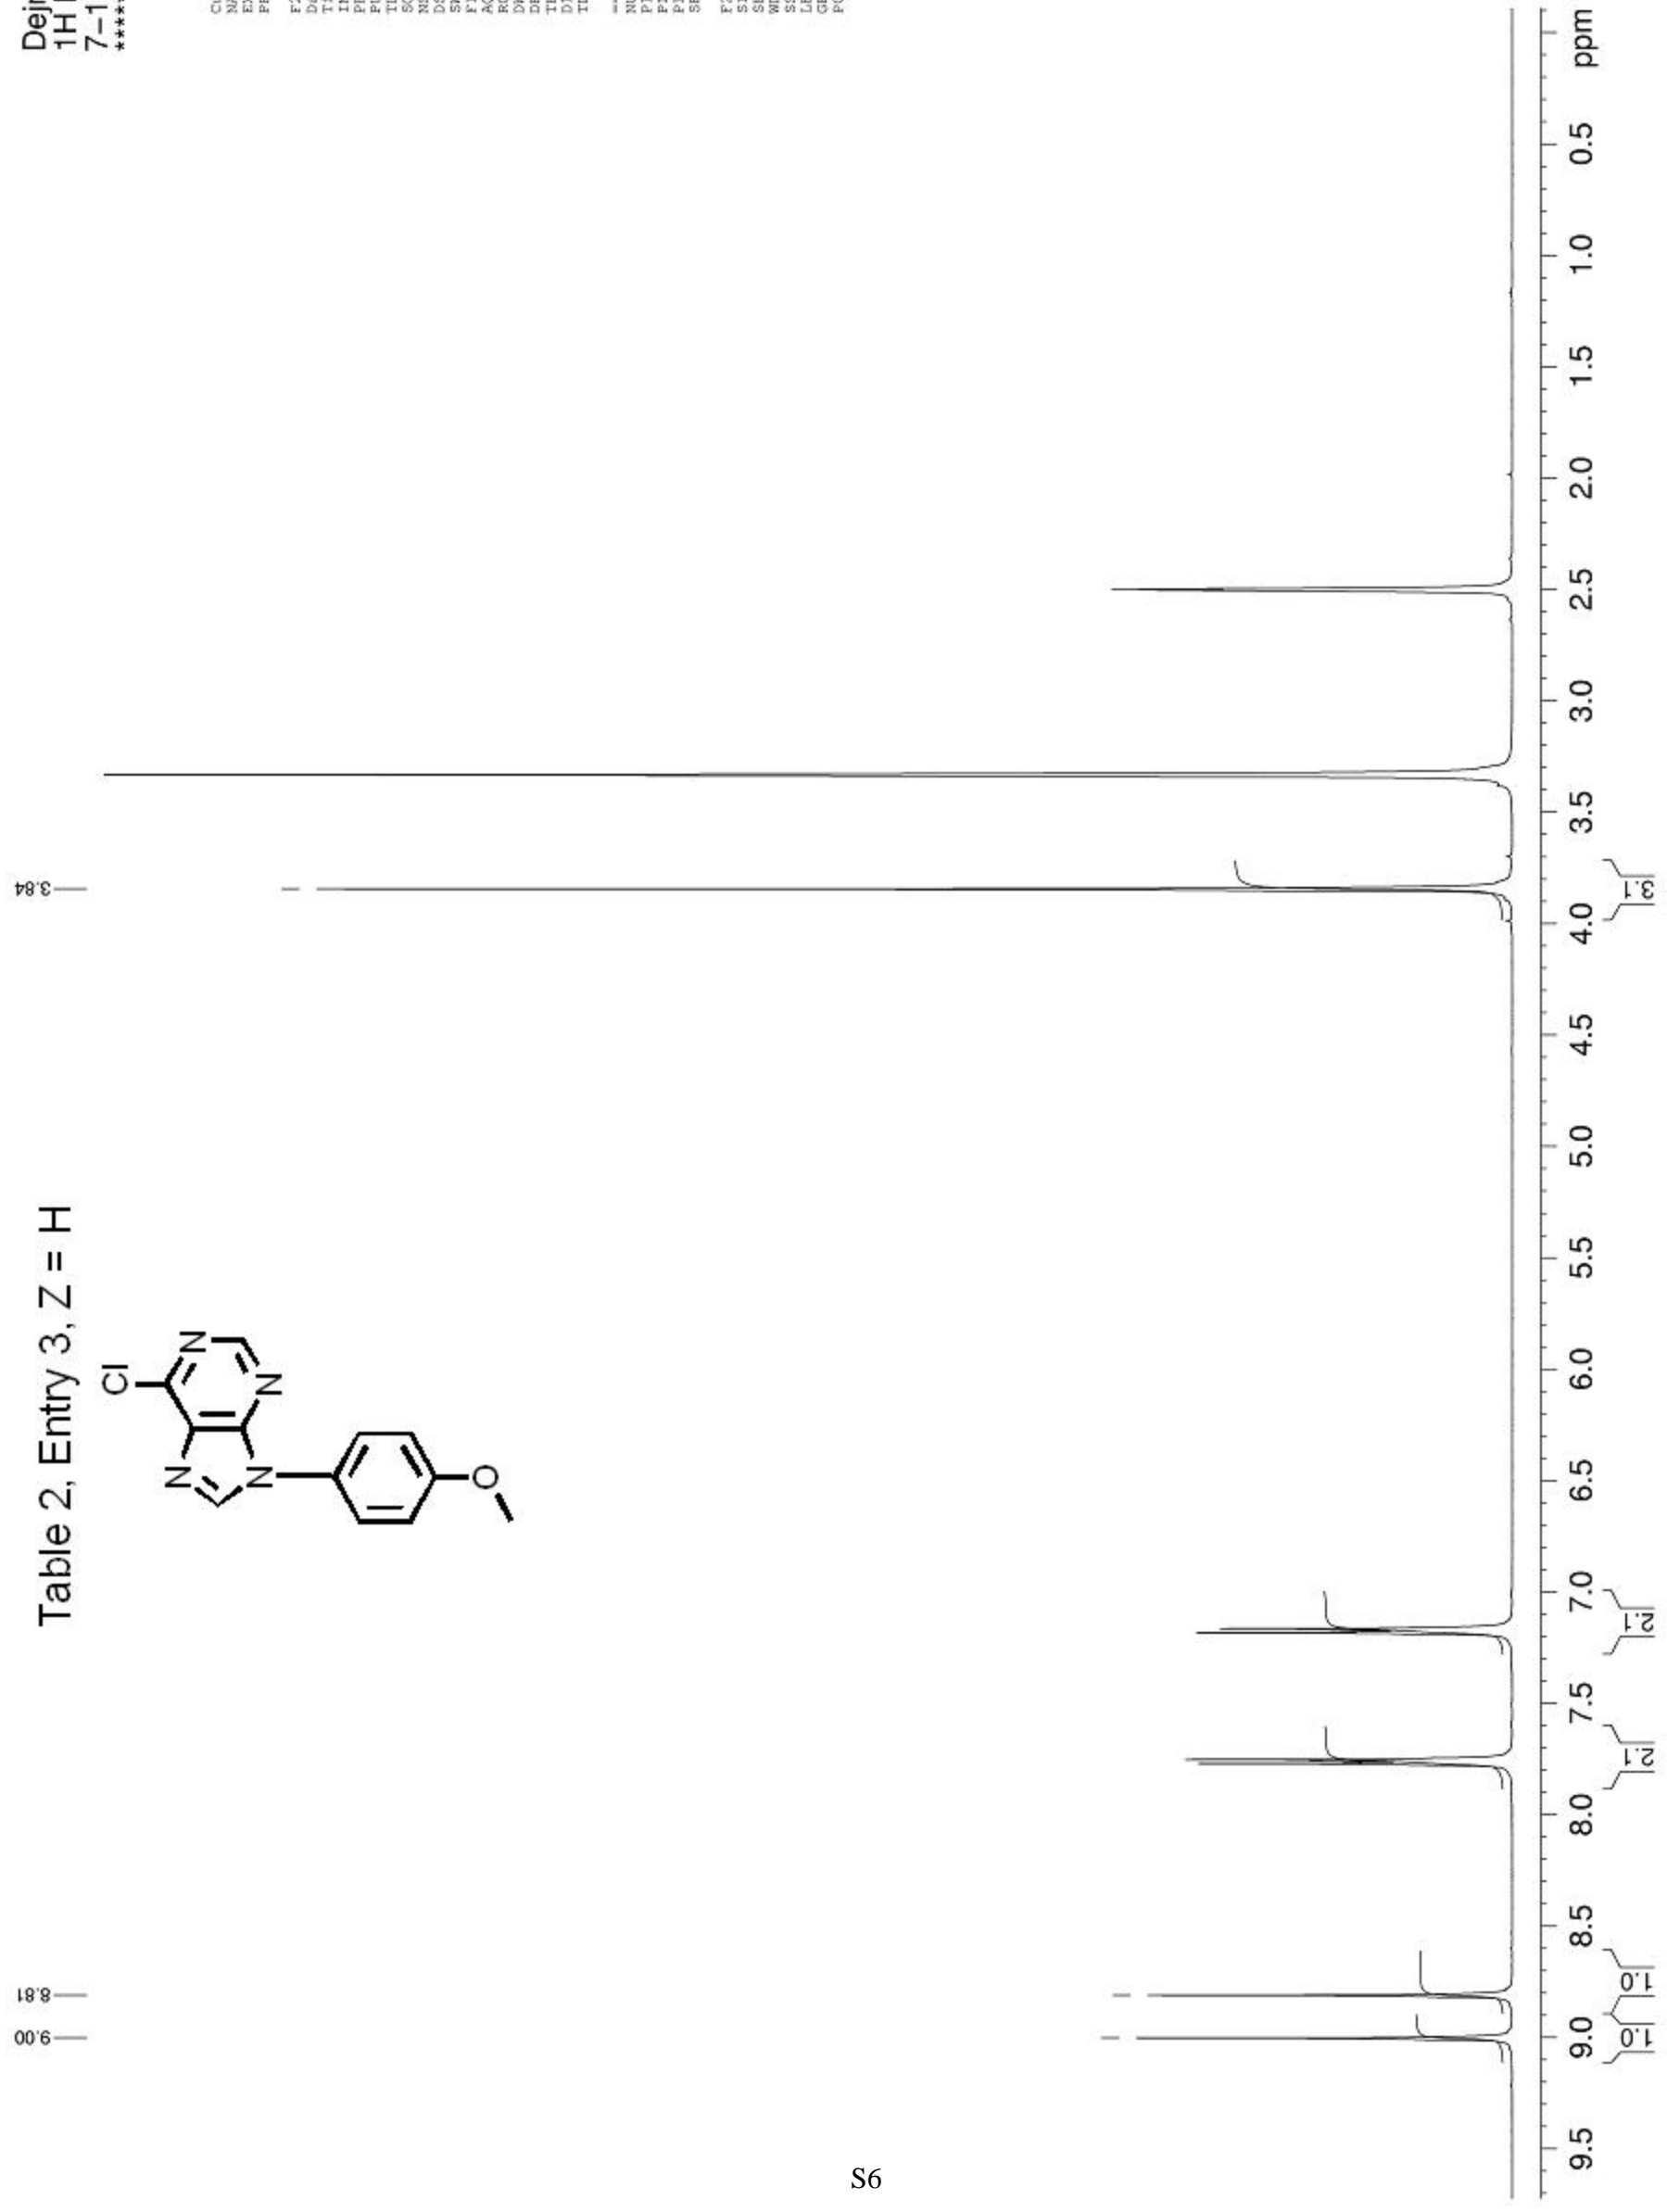

Dejmek\_MD381  
APT in DMSO  
7-12-11 DR  
\*\*\*\*\*

NAME Dejmek\_MD381  
EXPNO 2  
PROCNO 1  
Date\_ 20111207  
Time\_ 14.48  
INSTRUM spect  
PROBHD 5 mm TXI 1H-13  
PULPROG jmod  
TD 65536  
SOLVENT DMSO  
NS 376  
DS 4  
SWH 30030.029 Hz  
FIDRES 0.458222 Hz  
AQ 1.0912410 sec  
RG 29193  
DW 16.650 usec  
DE 6.50 usec  
TE 300.0 K  
CNST2 165.0000000  
CNST11 1.0000000  
D1 2.00000000 sec  
D20 0.00606061 sec  
TD0 1

==== CHANNEL f1 =====  
NUC1 13C  
P1 14.75 usec  
P2 29.50 usec  
PL1 0.00 dB  
PL1W 67.82093048 W  
SFO1 125.7263554 MHz

==== CHANNEL f2 =====  
CPDPRG2 waltz16  
NUC2 1H  
PCPD2 60.00 usec  
PL2 0.00 dB  
PL12 17.50 dB  
PL2W 8.54041386 W  
PL12W 0.15187243 W  
SFO2 499.9519998 MHz  
SI 131072  
SF 125.7125630 MHz  
WDW EM  
SSB 0  
LB 1.00 Hz  
GB 0  
PC 1.00

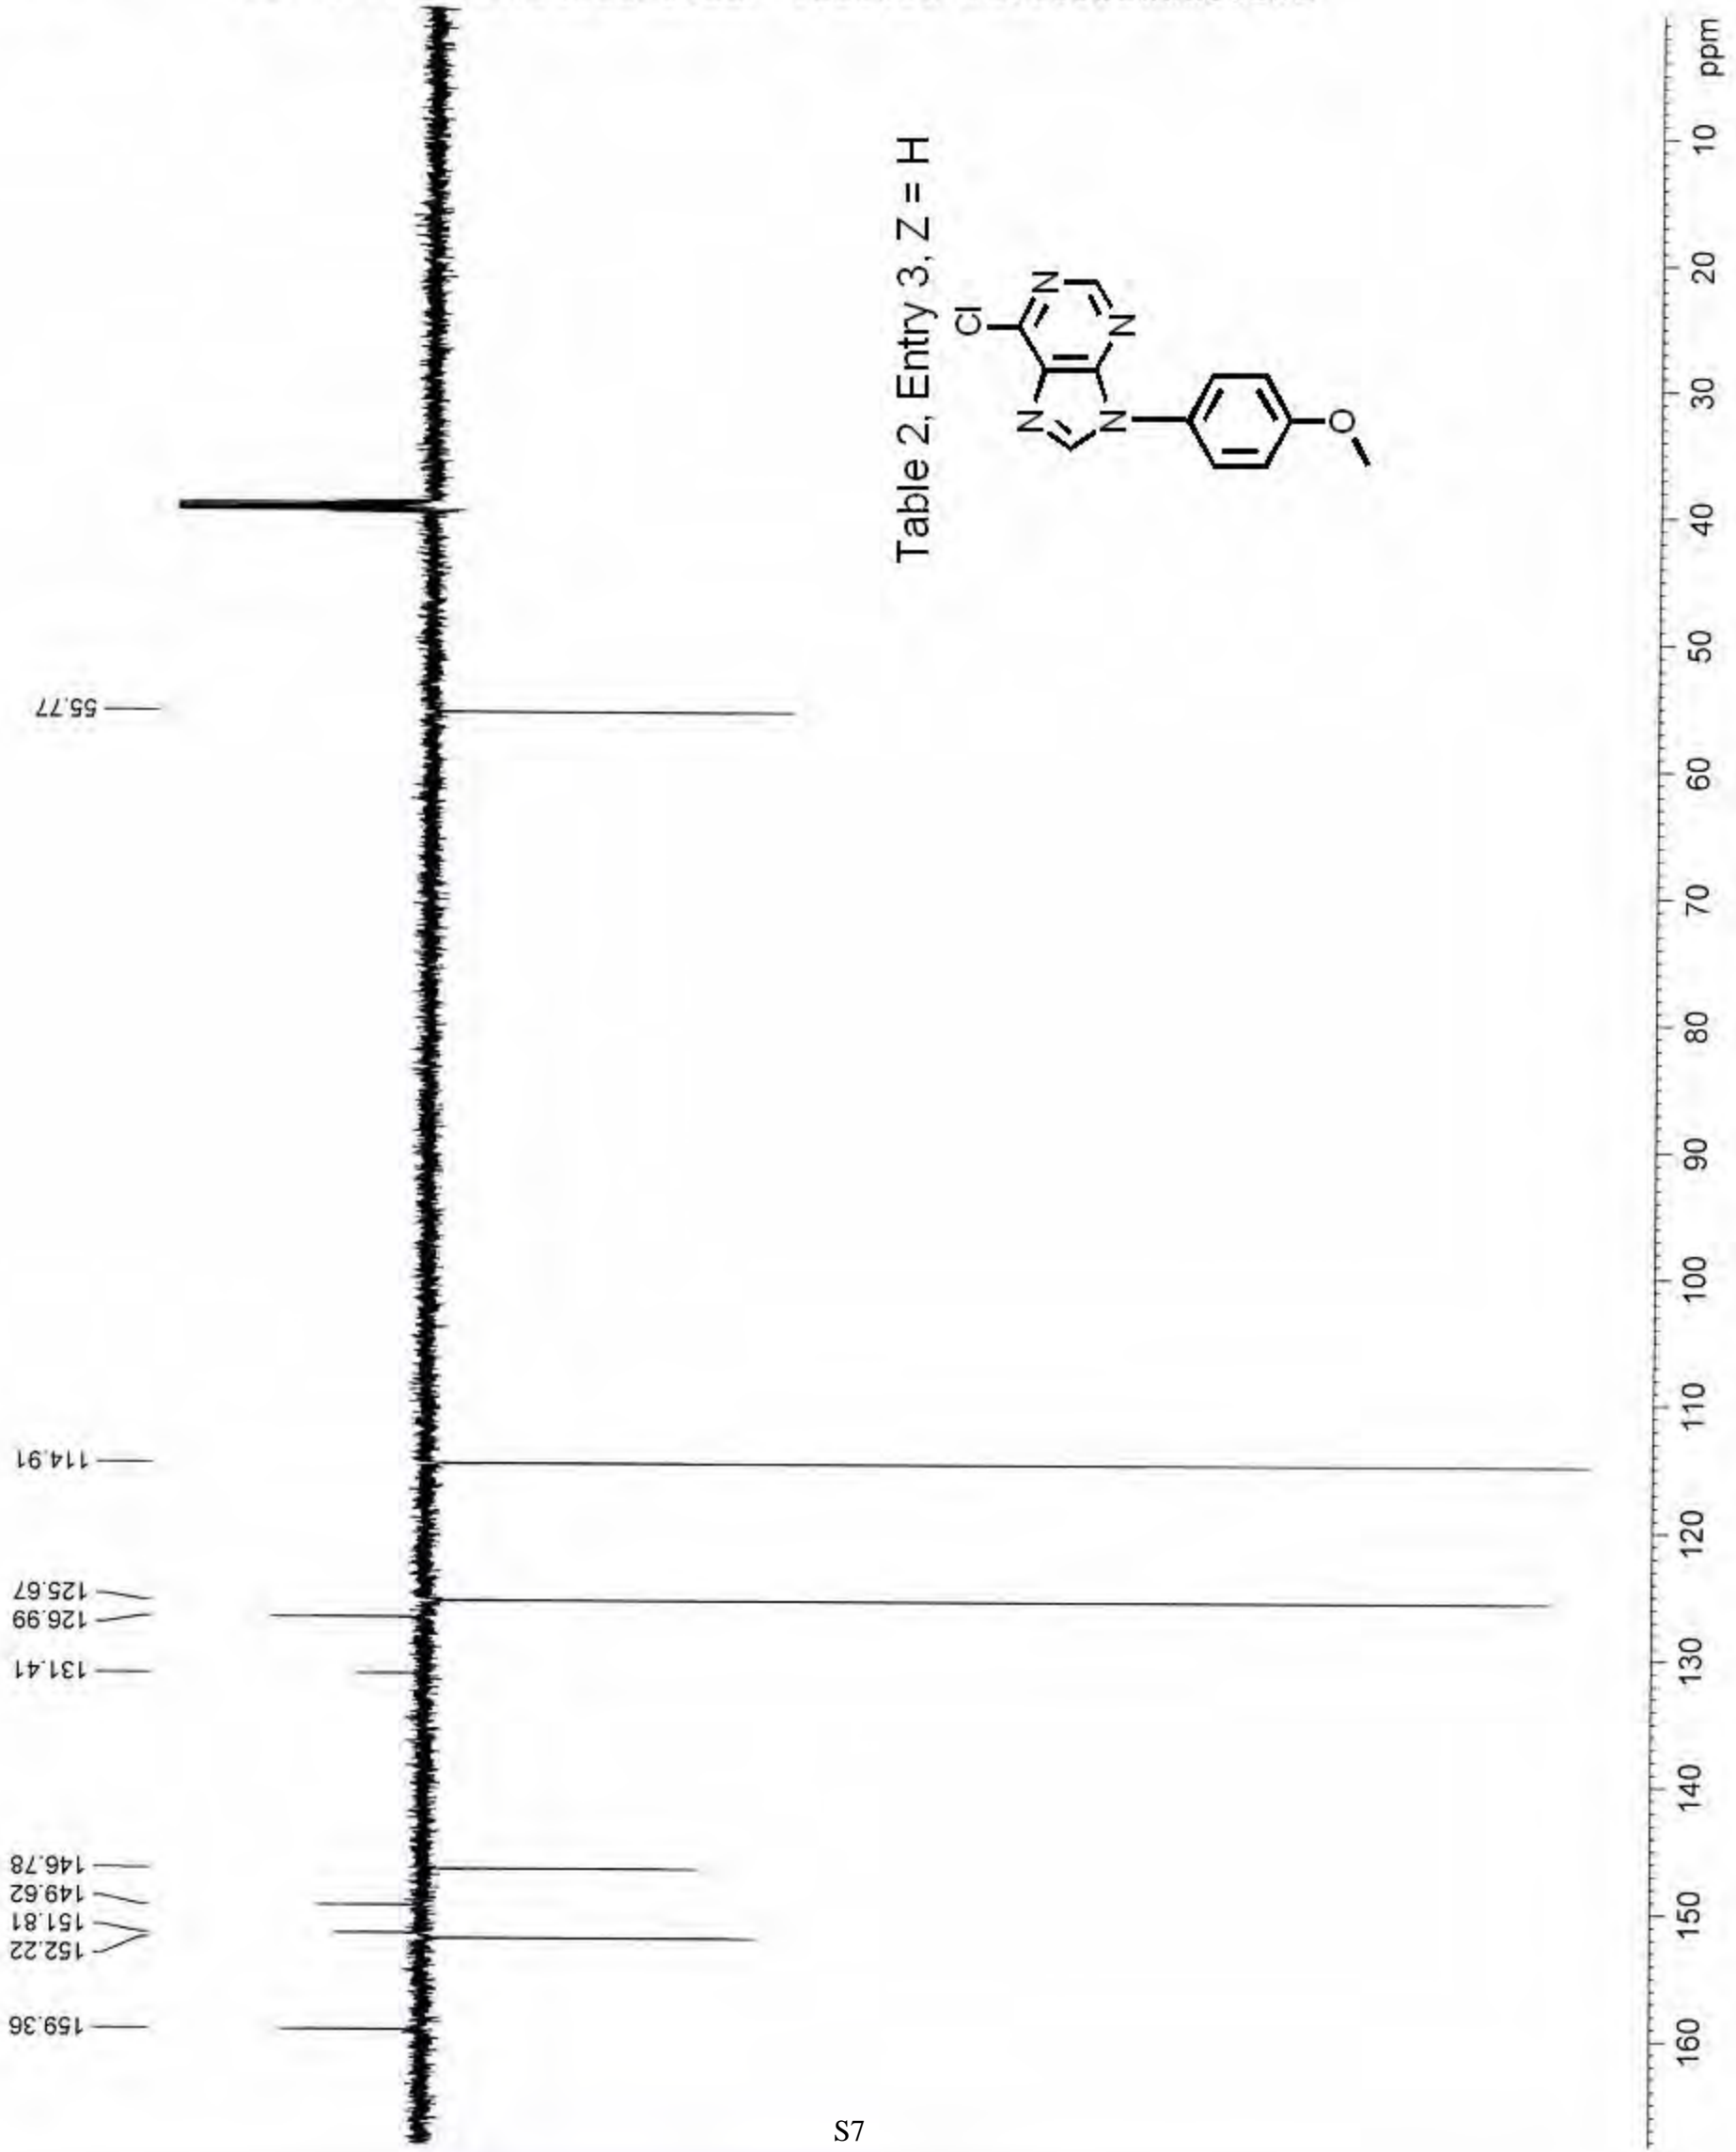

Table 2, Entry 3, Z = NH<sub>2</sub>

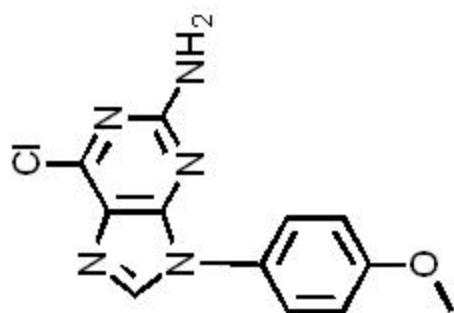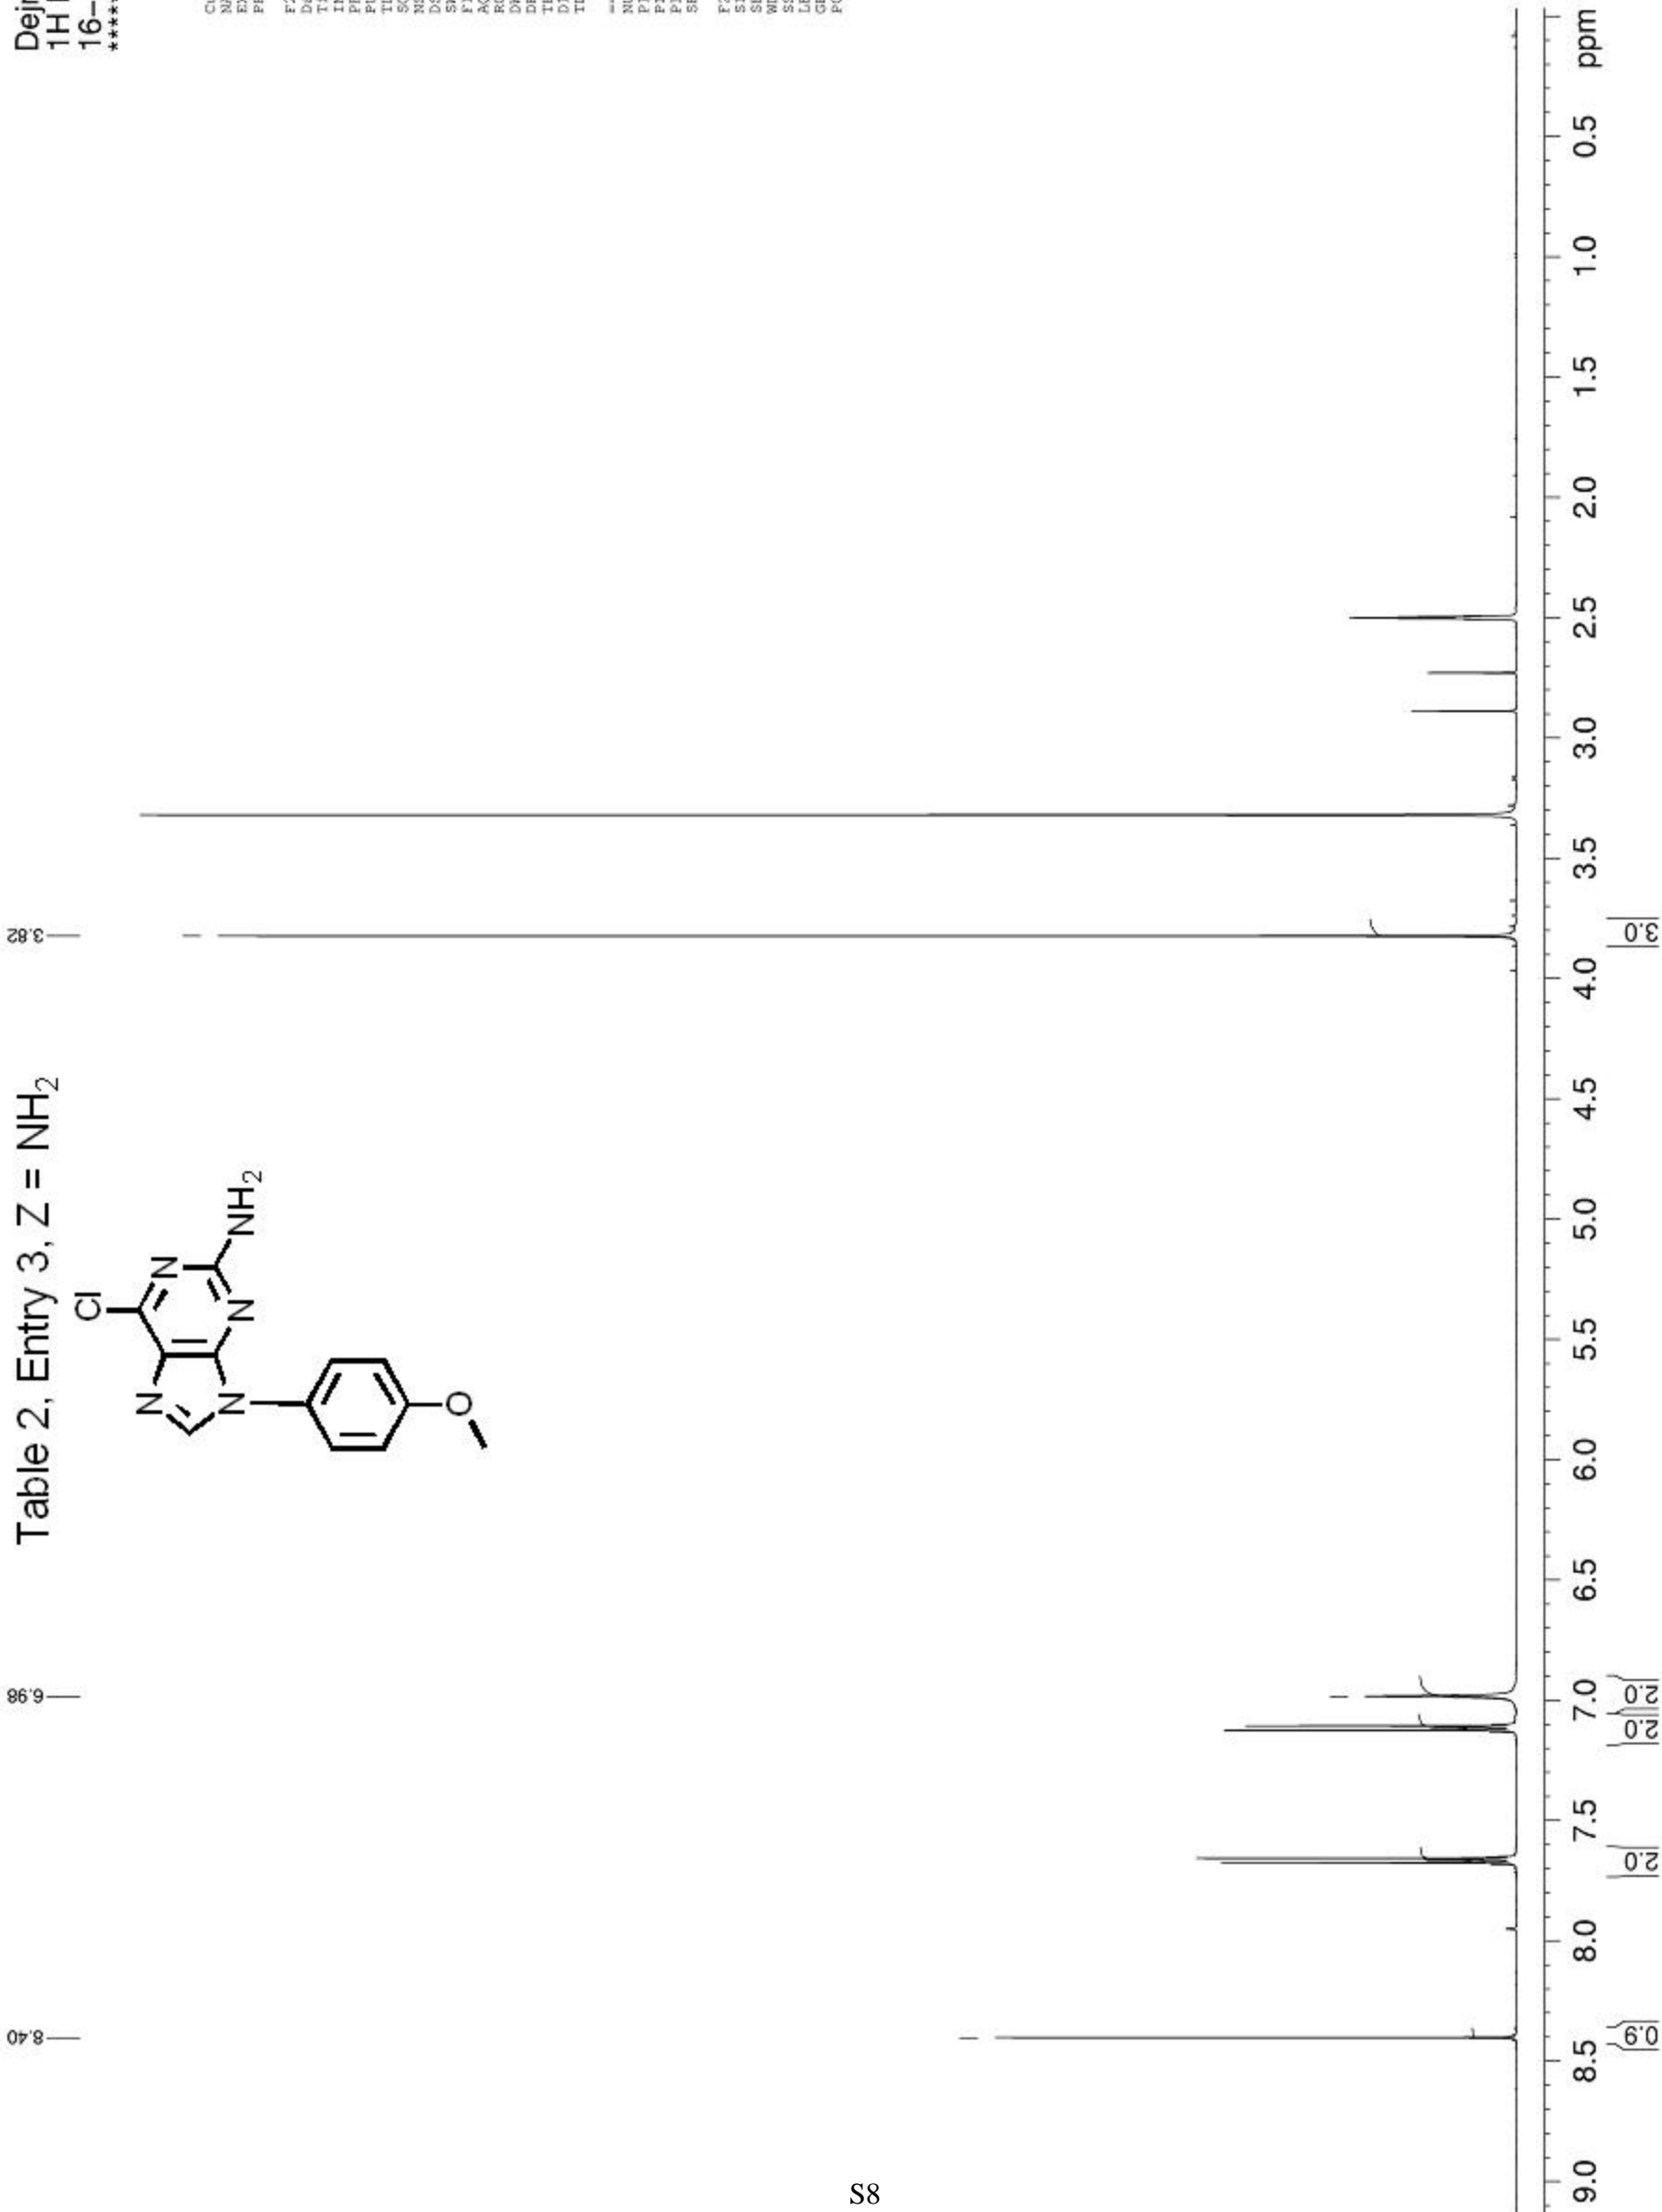

Dejmek\_MD364  
1H NMR in DMSO  
16-11-11 DR  
\*\*\*\*\*

Current Data Parameters  
NAME Dejmek\_MD364  
EXPNO 1  
PROCNO 1  
F2 - Acquisition Parameters  
Date\_ 20111116  
Time 13.41  
INSTRUM spect  
PROBHD 5 mm TXI 1H-13  
PULPROG zg30  
TD 65536  
SOLVENT DMSO  
NS 32  
DS 0  
SWH 7507.507 Hz  
FIDRES 0.124929 Hz  
AQ 4.0023770 sec  
RG 14.3  
DN 66.600 usec  
DE 6.00 usec  
TE 300.0 K  
D1 1.00000000 sec  
TD0 1  
===== CHANNEL f1 =====  
NUC1 1H  
P1 8.00 usec  
PL1 0.00 dB  
PL1W 8.54041386 W  
SFO1 499.9534997 MHz  
F2 - Processing parameters  
SI 131072  
SF 499.9499979 MHz  
WDW nc  
SSB 0  
LB 0.00 Hz  
GB 0  
PC 1.00



Table 2, Entry 3, Z = NH<sub>2</sub>

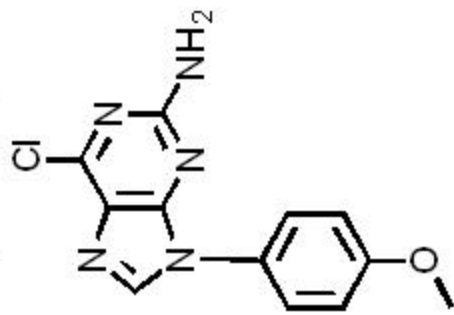

55.73

114.75

123.69

125.57

127.58

142.45

149.98

154.02

158.94

160.34

69

Current Data Parameters  
NAME Dejimek\_MD364  
EXPNO 2  
PROCNO 1  
F2 - Acquisition Parameters  
Date\_ 20111116  
Time 14.00  
INSTRUM spect  
PROBHD 5 mm TXI 1H-13  
PULPROG jmod  
TD 65536  
SOLVENT DMSO  
NS 1261  
DS 4  
SWH 30030.029 Hz  
FIDRES 0.458222 Hz  
AQ 1.0912410 sec  
RG 29193  
DW 16.650 usec  
DE 6.50 usec  
TE 300.0 K  
CNST2 165.0000000  
CNST11 1.0000000  
D1 2.000000000 sec  
D20 0.00606061 sec  
TD0 1  
===== CHANNEL f1 =====  
NUC1 13C  
P1 14.75 usec  
P2 29.50 usec  
PL1 0.00 dB  
PL1W 67.82093048 W  
SFO1 125.7263554 MHz  
===== CHANNEL f2 =====  
CPDPRG2 waltz16  
NUC2 1H  
PCPD2 60.00 usec  
PL2 0.00 dB  
PL12 17.50 dB  
PL2W 8.54041386 W  
PL12W 0.15187243 W  
SFO2 499.9519998 MHz  
F2 - Processing parameters  
SI 131072  
SF 125.7125639 MHz  
WDW EM  
SSB 0  
LB 1.00 Hz  
GB 0  
PC 1.00

160 150 140 130 120 110 100 90 80 70 60 50 40 30 20 10 ppm

Table 2, Entry 4, Z = H

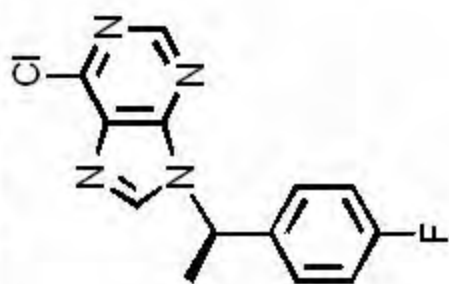

Dejmek\_MD342  
1H NMR in DMSO  
12-10-11 DR  
\*\*\*\*\*  
NAME Dejmek\_MD342  
EXPNO 1  
PROCNO 1  
Date\_ 20111012  
Time 17.10  
INSTRUM spect  
PROBHD 5 mm TXI 1H-  
PULPROG zg30  
TD 60094  
SOLVENT DMSO  
NS 32  
DS 0  
SWH 7507.507 Hz  
FIDRES 0.124929 Hz  
AQ 4.0023770 sec  
RG 14.3  
DW 66.600 usec  
DE 6.00 usec  
TE 300.1 K  
D1 1.00000000 sec  
TD0 1

==== CHANNEL f1 =  
NUC1 1H  
P1 9.00 usec  
PL1 3.00 dB  
PL1W 4.28034639 V  
SFO1 499.9534997 M  
SI 131072  
SF 499.9500007 MF  
WDW no  
SSB 0  
LB 0.00 Hz  
GB 0  
PC 1.00

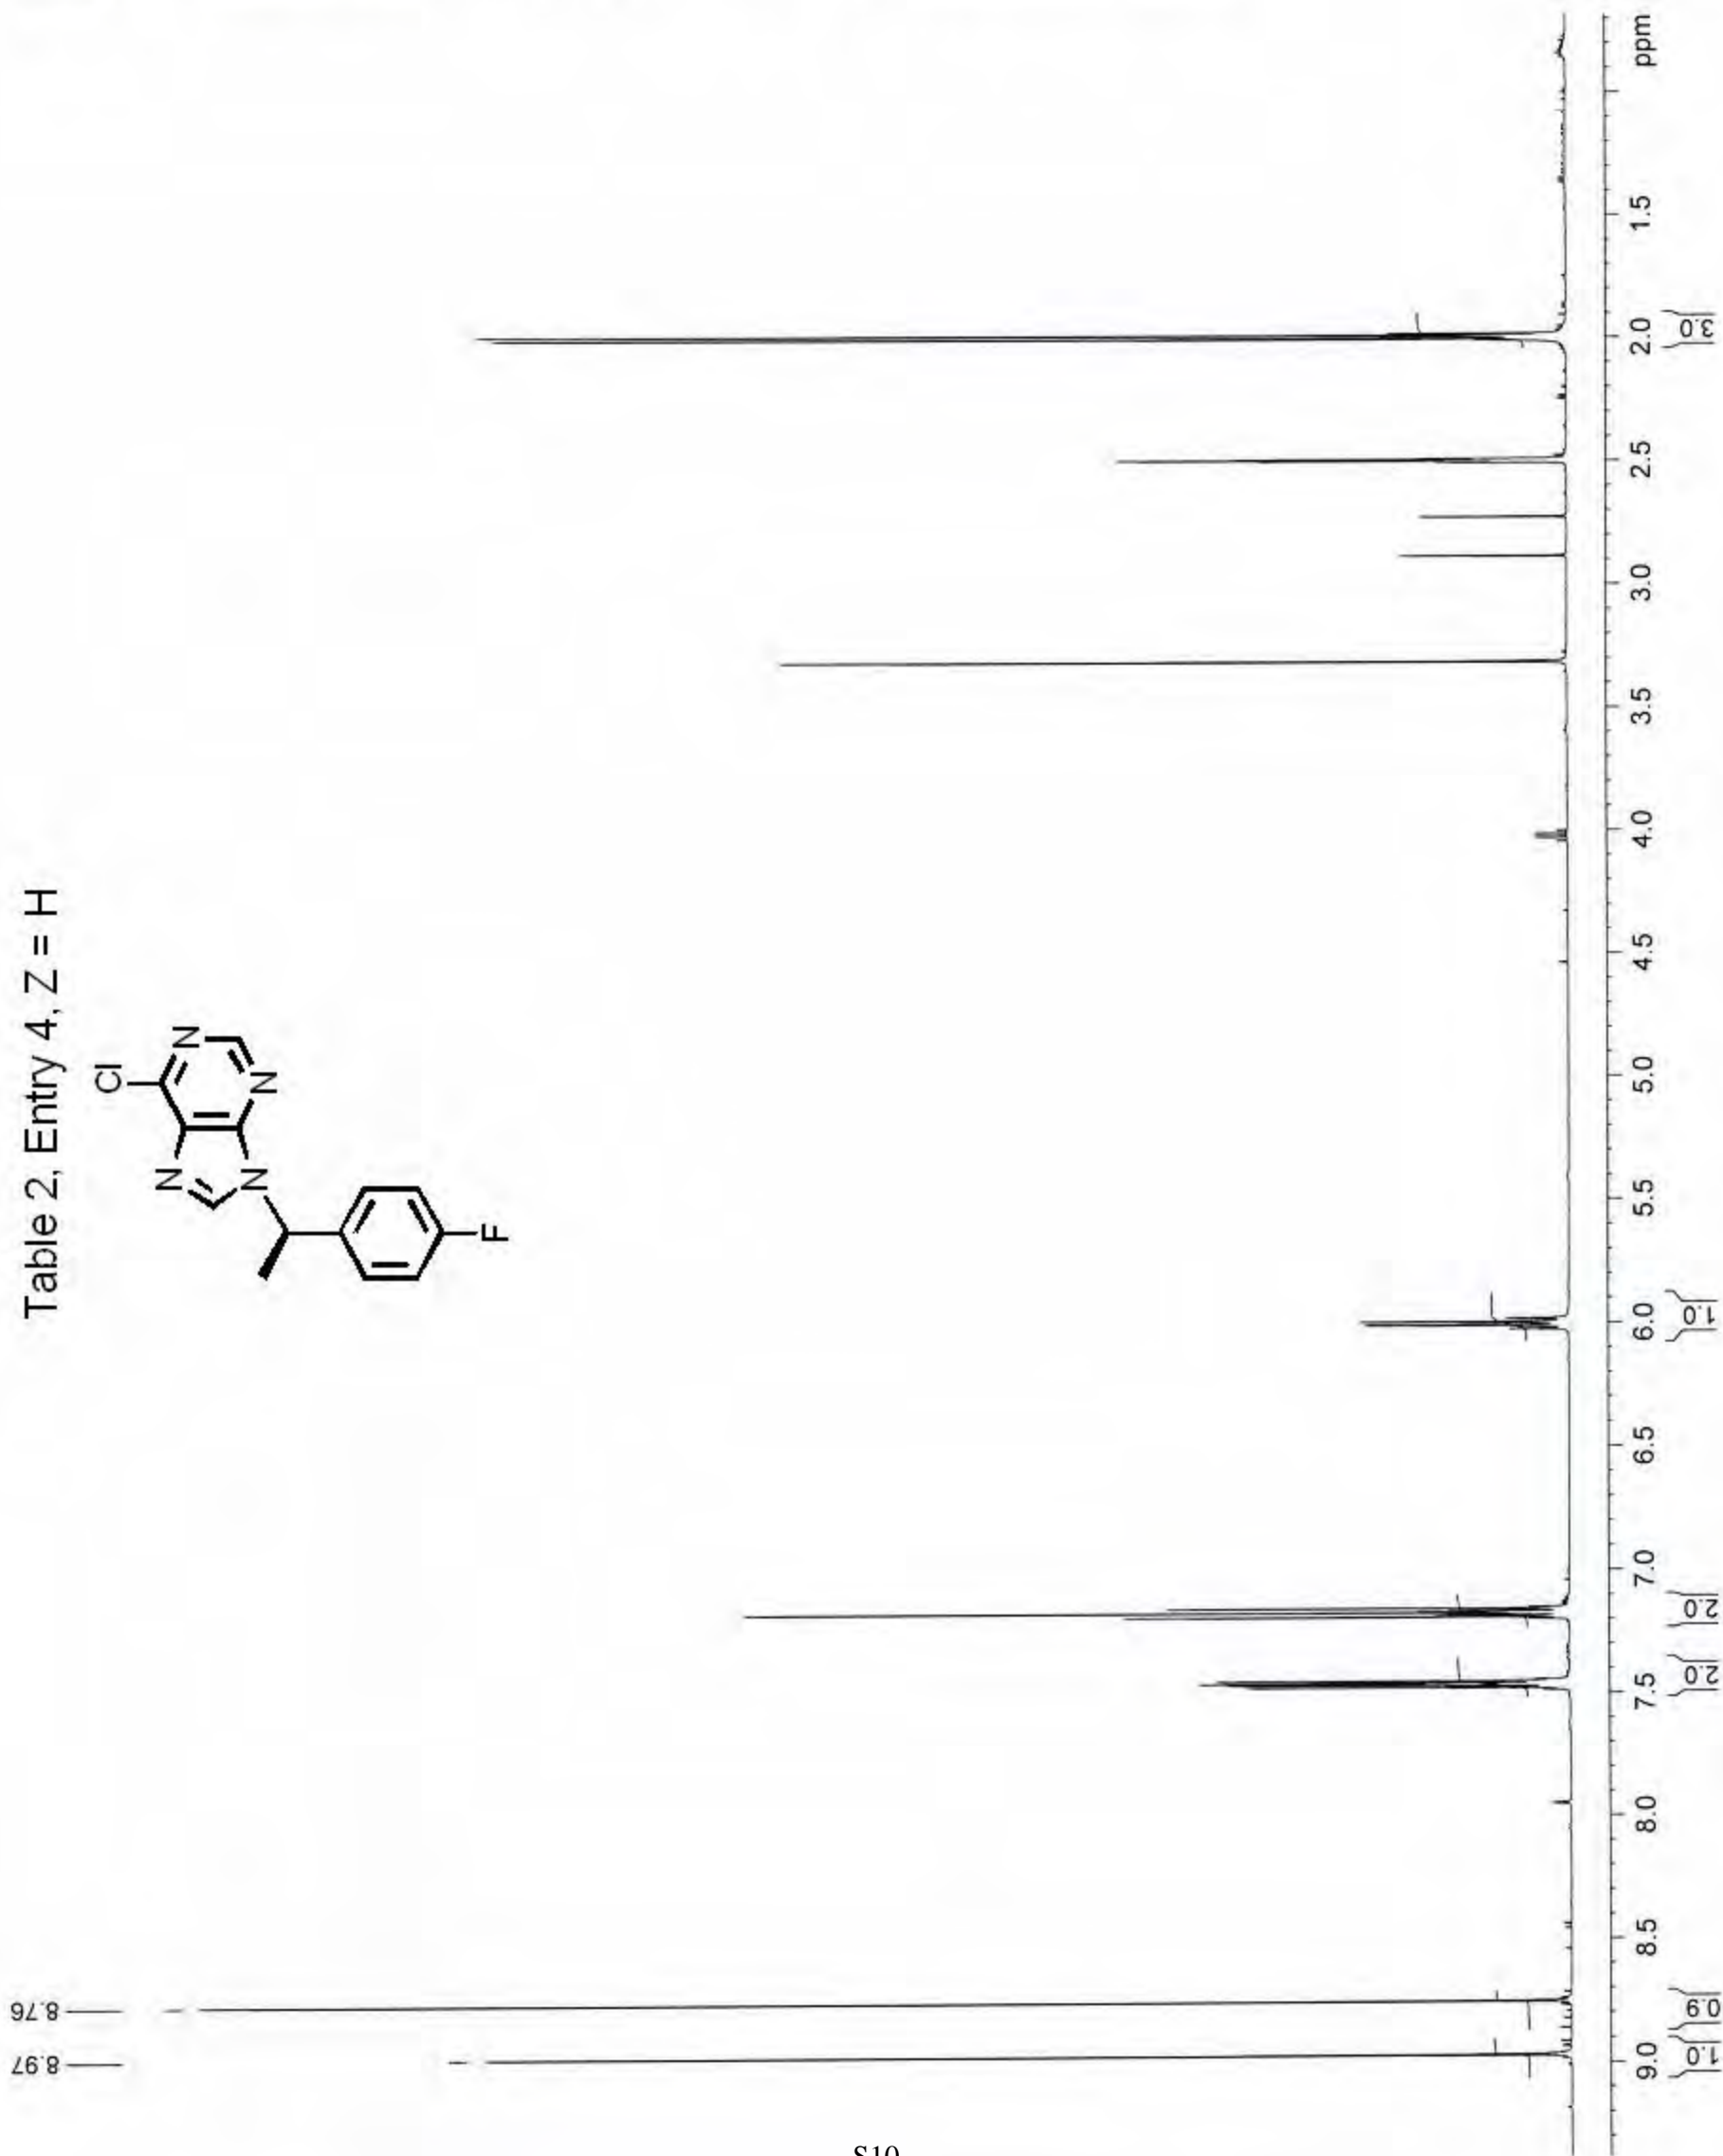

Dejmek\_MD342  
APT in DMSO  
12-10-11 DR  
\*\*\*\*\*

NAME Dejmek\_MD342  
EXPNO 2  
PROCNO 1  
Date\_ 20111012  
Time\_ 17.51  
INSTRUM spect  
PROBHD 5 mm TXI 1H-13  
PULPROG jmod  
TD 65536  
SOLVENT DMSO  
NS 768  
DS 4

SWH 30030.029 Hz  
FIDRES 0.458222 Hz  
AQ 1.0912410 sec  
RG 29193  
DW 16.650 usec  
DE 6.50 usec  
TE 300.0 K  
CNST2 165.0000000  
CNST11 1.0000000  
D1 2.00000000 sec  
D20 0.00606061 sec  
TD0 1

==== CHANNEL f1 =====  
NUC1 13C  
P1 14.50 usec  
P2 29.00 usec  
PL1 0.00 dB  
PL1W 67.82093048 W  
SFO1 125.7263554 MHz

==== CHANNEL f2 =====  
CPDPRG2 waltz16  
NUC2 1H  
PCPD2 60.00 usec  
PL2 3.00 dB  
PL12 19.48 dB  
PL2W 4.28034639 W  
PL12W 0.09626734 W  
SFO2 499.9519998 MHz  
SI 131072  
SF 125.7125663 MHz  
WDW EM  
SSB 0  
LB 1.00 Hz  
GB 0  
PC 1.00

20.42

54.00

115.61  
115.78

128.74  
128.80  
131.29

136.98  
137.00

146.07

149.35  
151.65

160.83  
162.78

Table 2, Entry 4, Z = H

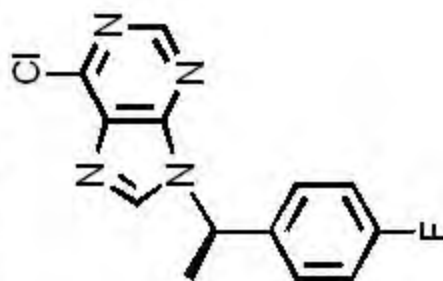

MRPŮ RĚFNŮ+ĚLKĀ

Table 2, Entry 4, Z = NH<sub>2</sub>

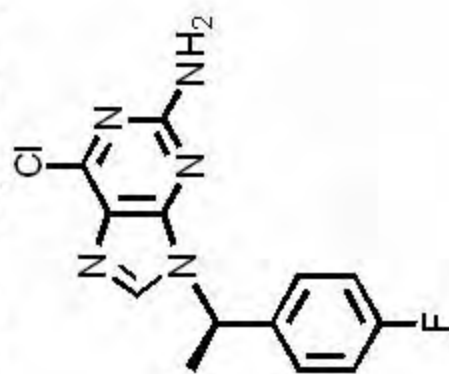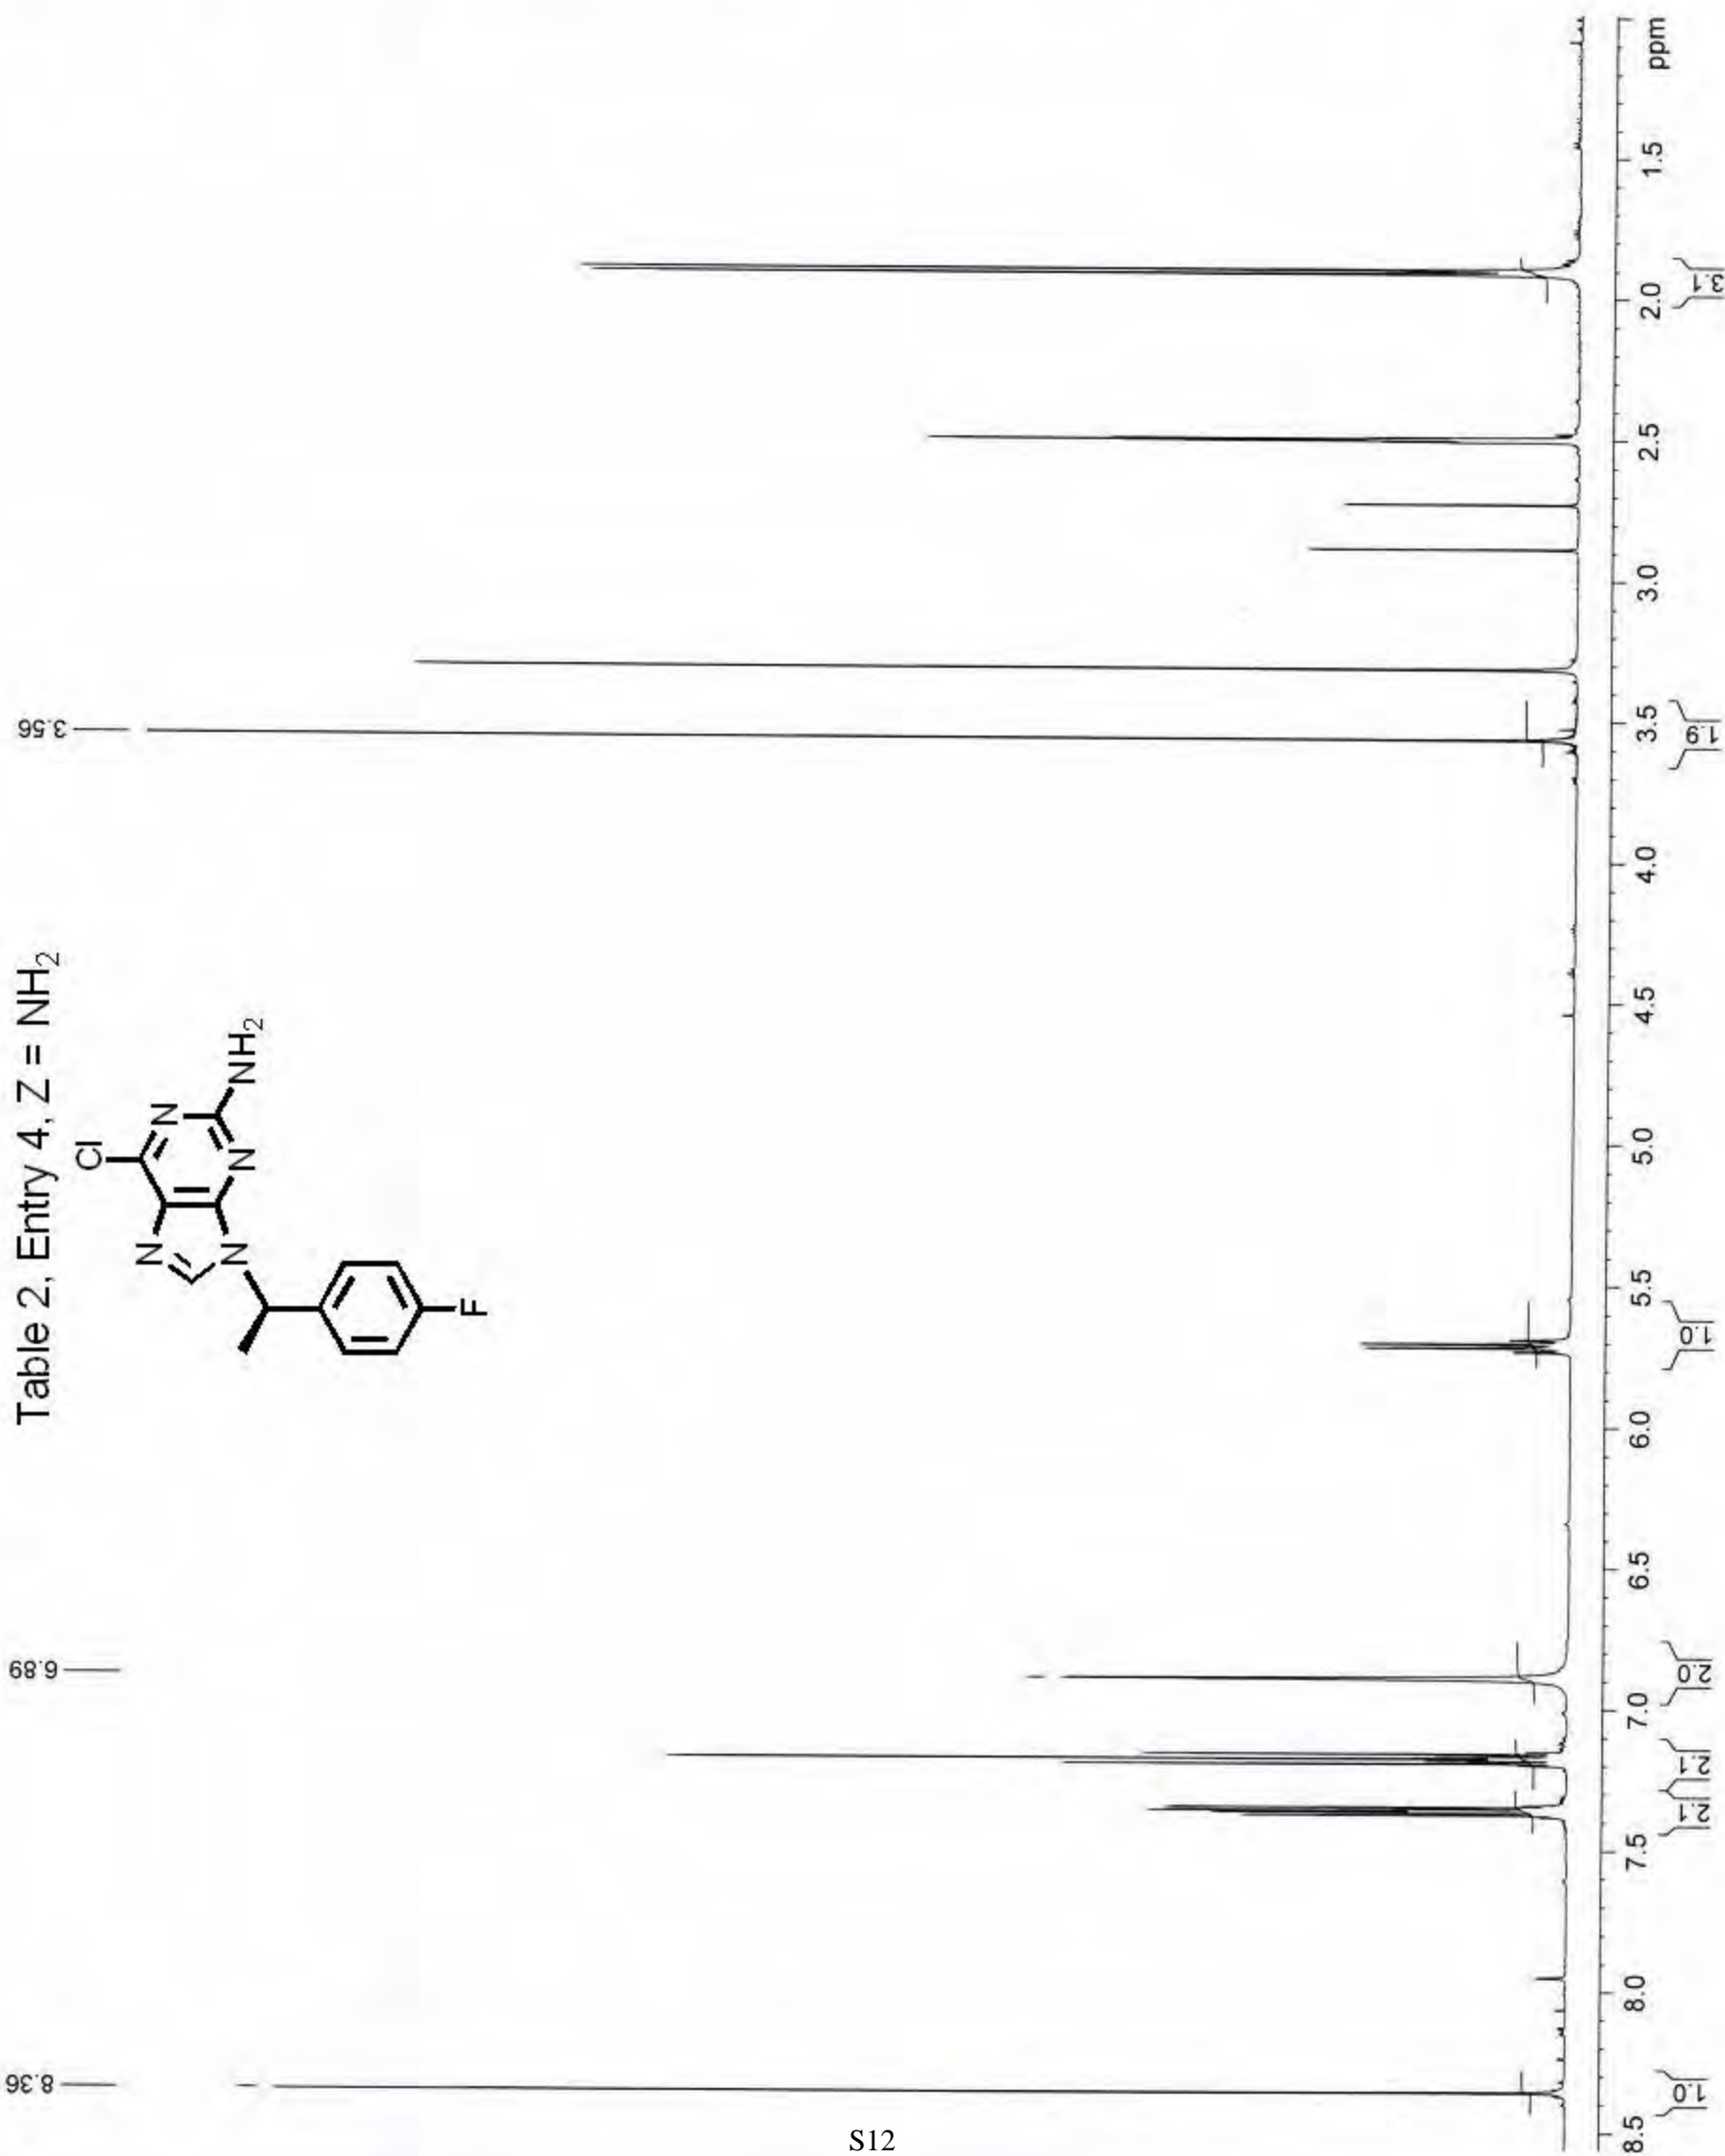

Dejmek\_MD341  
1H NMR in DMSO  
12-10-11 DR  
\*\*\*\*\*

NAME Dejmek\_MD341  
EXPNO 1  
PROCNO 1  
Date\_ 20111012  
Time 15.24  
INSTRUM spect  
PROBHD 5 mm TXI 1H  
PULPROG zg30  
TD 60094  
SOLVENT DMSO  
NS 32  
DS 0  
SWH 7507.507 Hz  
FIDRES 0.124929 Hz  
AQ 4.0023770 sec  
RG 14.3  
DW 66.600 usec  
DE 6.00 usec  
TE 300.1 K  
D1 1.00000000 sec  
TD0 1

==== CHANNEL f1 =  
NUC1 1H  
P1 9.00 usec  
PL1 3.00 dB  
PL1W 4.28034639 V  
SFO1 499.9534997 MHz  
SI 131072  
SF 499.9500006 MHz  
WDW no  
SSB 0  
LB 0.00 Hz  
GB 0  
PC 1.00

Table 2, Entry 4, Z = NH<sub>2</sub>

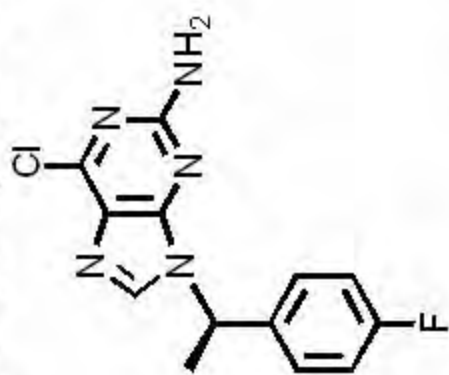

Dejmek\_MD341  
APT in DMSO  
12-10-11 DR  
\*\*\*\*\*

NAME Dejmek\_MD341  
EXPNO 2  
PROCNO 1  
Date\_ 20111012  
Time 15.44  
INSTRUM spect  
PROBHD 5 mm TXI 1H-13  
PULPROG jmod  
TD 65536  
SOLVENT DMSO  
NS 1196  
DS 4  
SWH 30030.029 Hz  
FIDRES 0.458222 Hz  
AQ 1.0912410 sec  
RG 29193  
DW 16.650 usec  
DE 6.50 usec  
TE 300.1 K  
CNST2 165.0000000  
CNST11 1.0000000  
D1 2.00000000 sec  
D20 0.00606061 sec  
TD0 1

==== CHANNEL f1 =====  
NUC1 13C  
P1 14.50 usec  
P2 29.00 usec  
PL1 0.00 dB  
PL1W 67.82093048 W  
SFO1 125.7263554 MHz

==== CHANNEL f2 =====  
CPDPRG2 waltz16  
NUC2 1H  
PCPD2 60.00 usec  
PL2 3.00 dB  
PL12 19.48 dB  
PL2W 4.28034639 W  
PL12W 0.09626734 W  
SFO2 499.9519998 MHz  
SI 131072  
SF 125.7125657 MHz  
WDW EM  
SSB 0  
LB 1.00 Hz  
GB 0  
PC 1.00

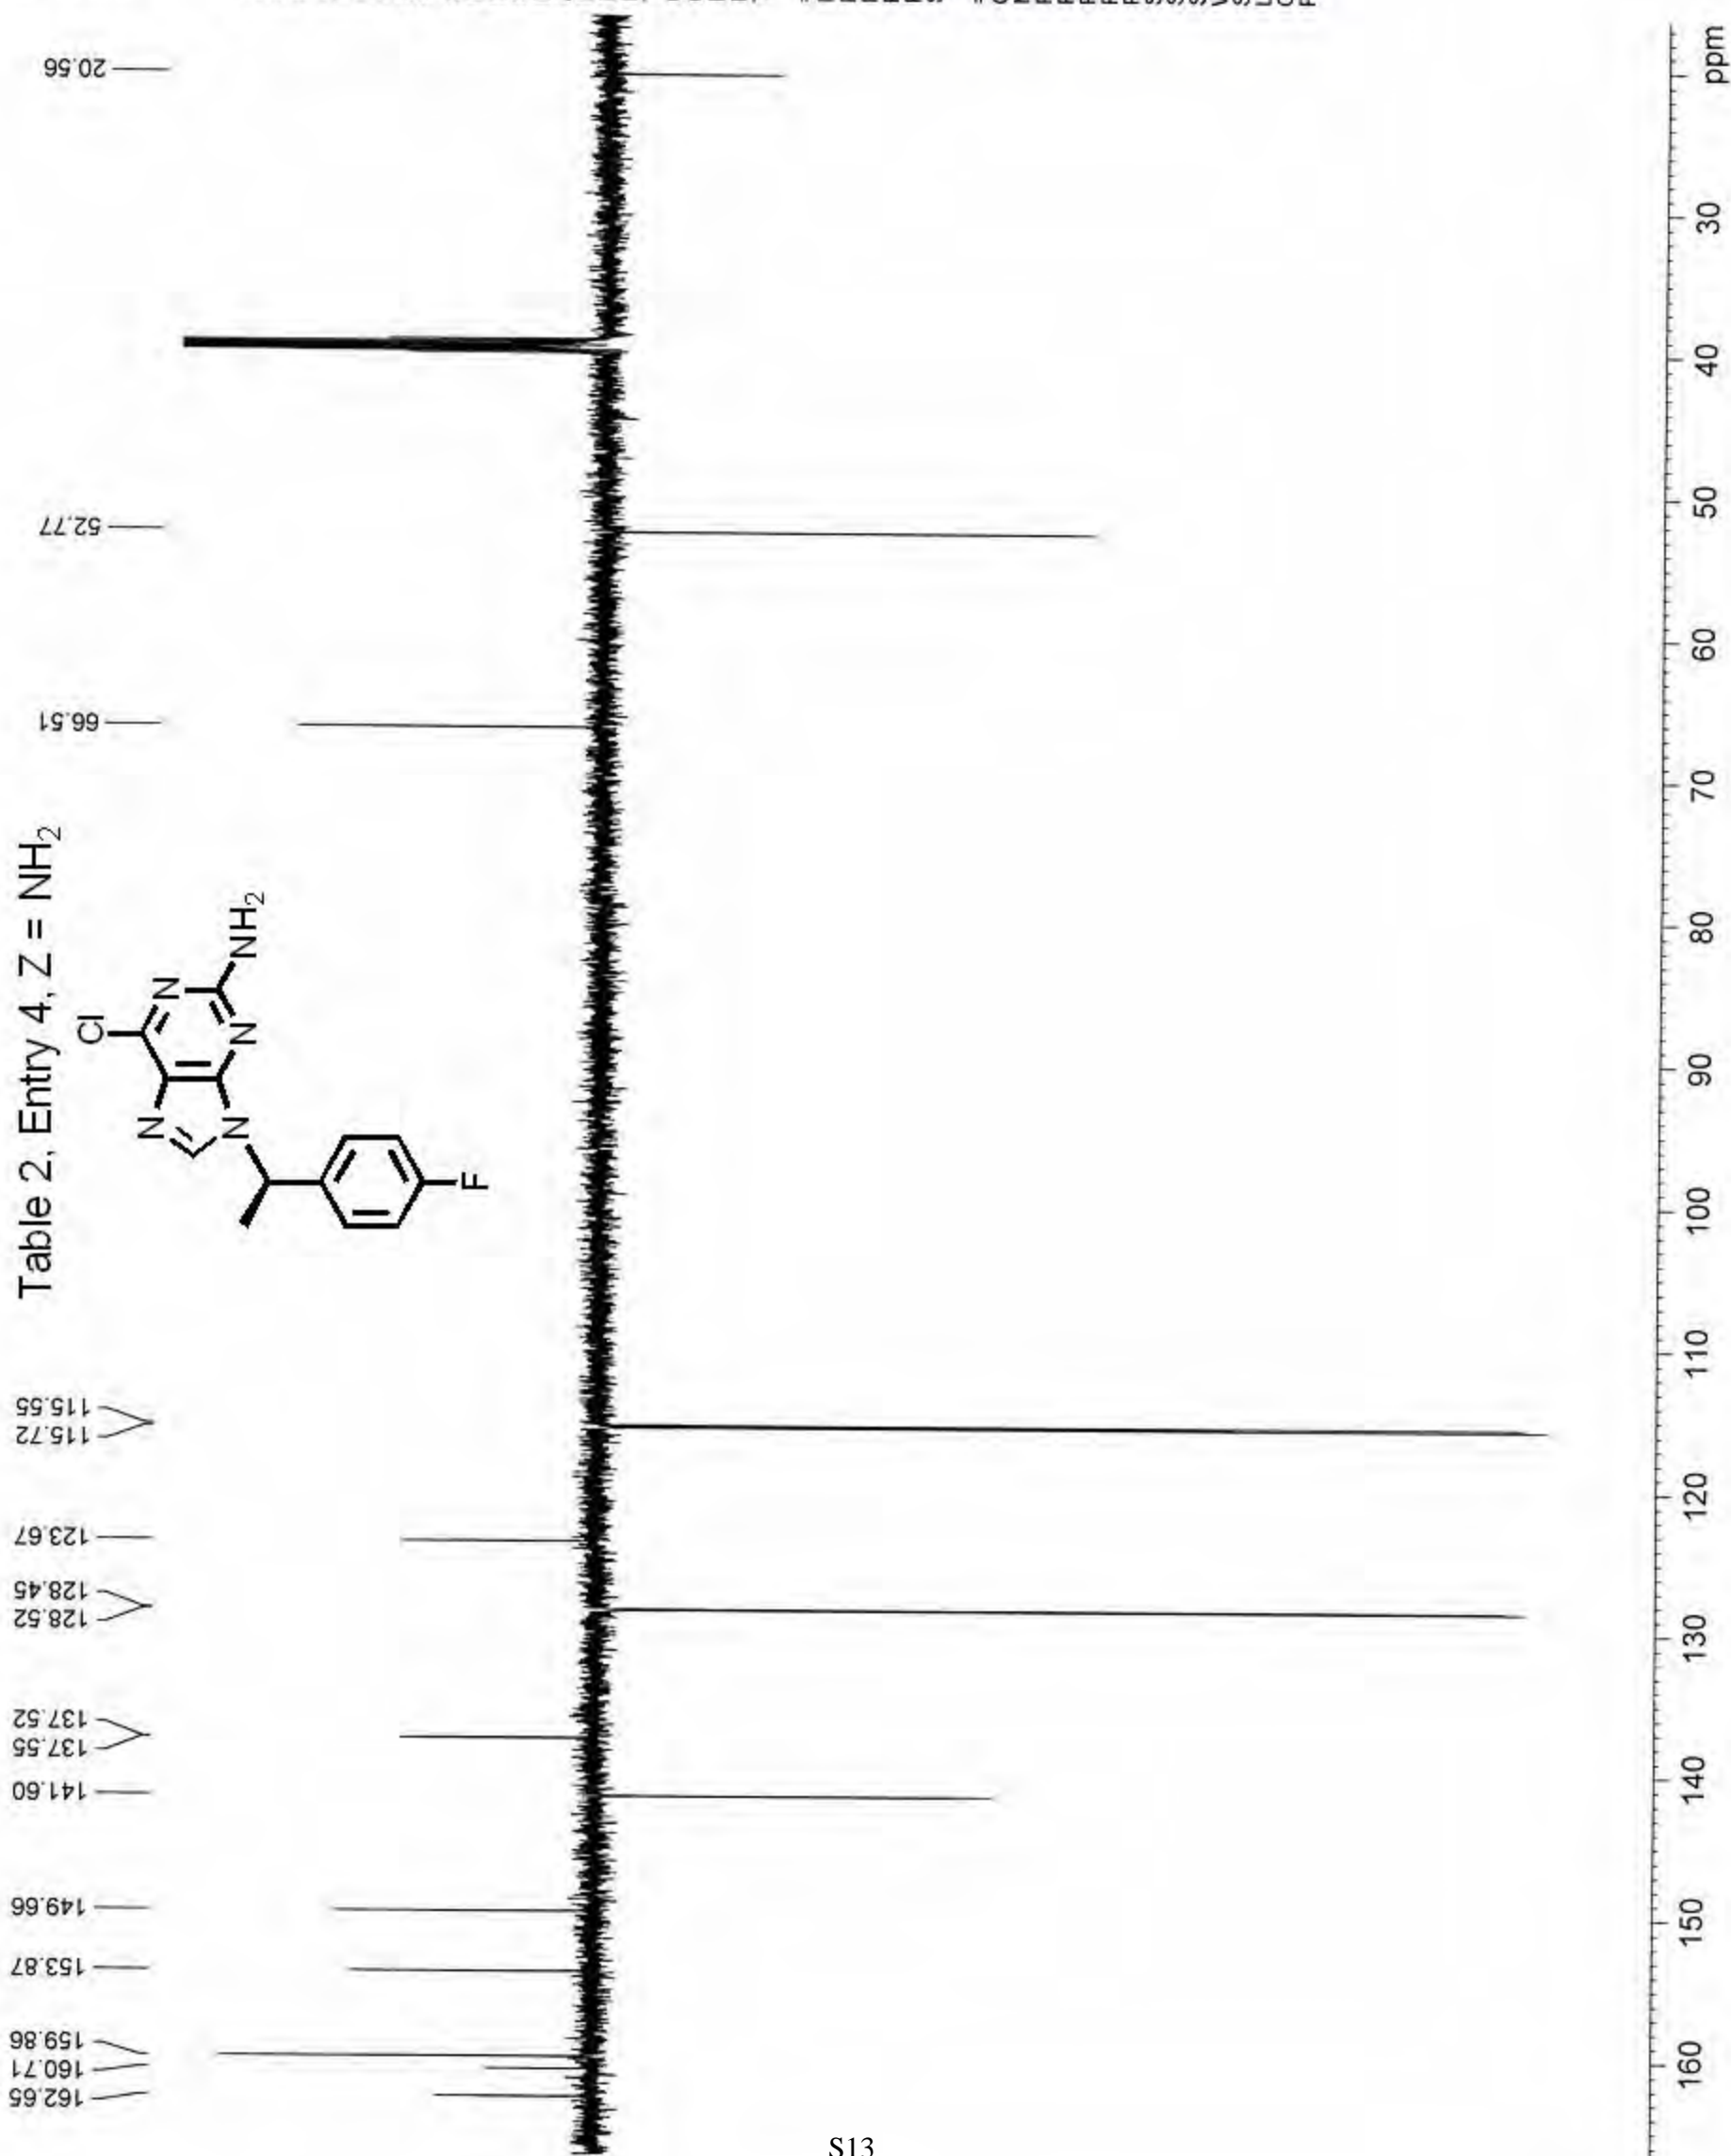

Table 2, Entry 5, Z = NH<sub>2</sub>

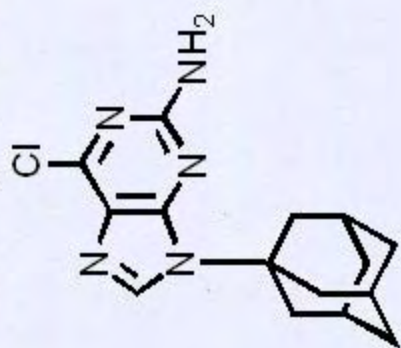

6.77

8.11

Dejmek\_MD330  
1H NMR in DMSO  
7-9-11 DR  
\*\*\*\*\*

NAME Dejmek\_MD330  
EXPNO 1  
PROCNO 1  
Date\_ 20110907  
Time 15.13  
INSTRUM spect  
PROBHD 5 mm TXI 1H-  
PULPROG zg30  
TD 60094  
SOLVENT DMSO  
NS 32  
DS 0  
SWH 7507.507 Hz  
FIDRES 0.124929 Hz  
AQ 4.0023770 sec  
RG 14.3  
DW 66.600 usec  
DE 6.00 usec  
TE 300.0 K  
D1 1.00000000 sec  
TD0 1

==== CHANNEL f1 =  
NUC1 1H  
P1 9.00 usec  
PL1 3.00 dB  
PL1W 4.28034639 V  
SFO1 499.9534997 M  
SI 131072  
SF 499.9499988 MHz  
WDW no  
SSB 0  
LB 0.00 Hz  
GB 0  
PC 1.00

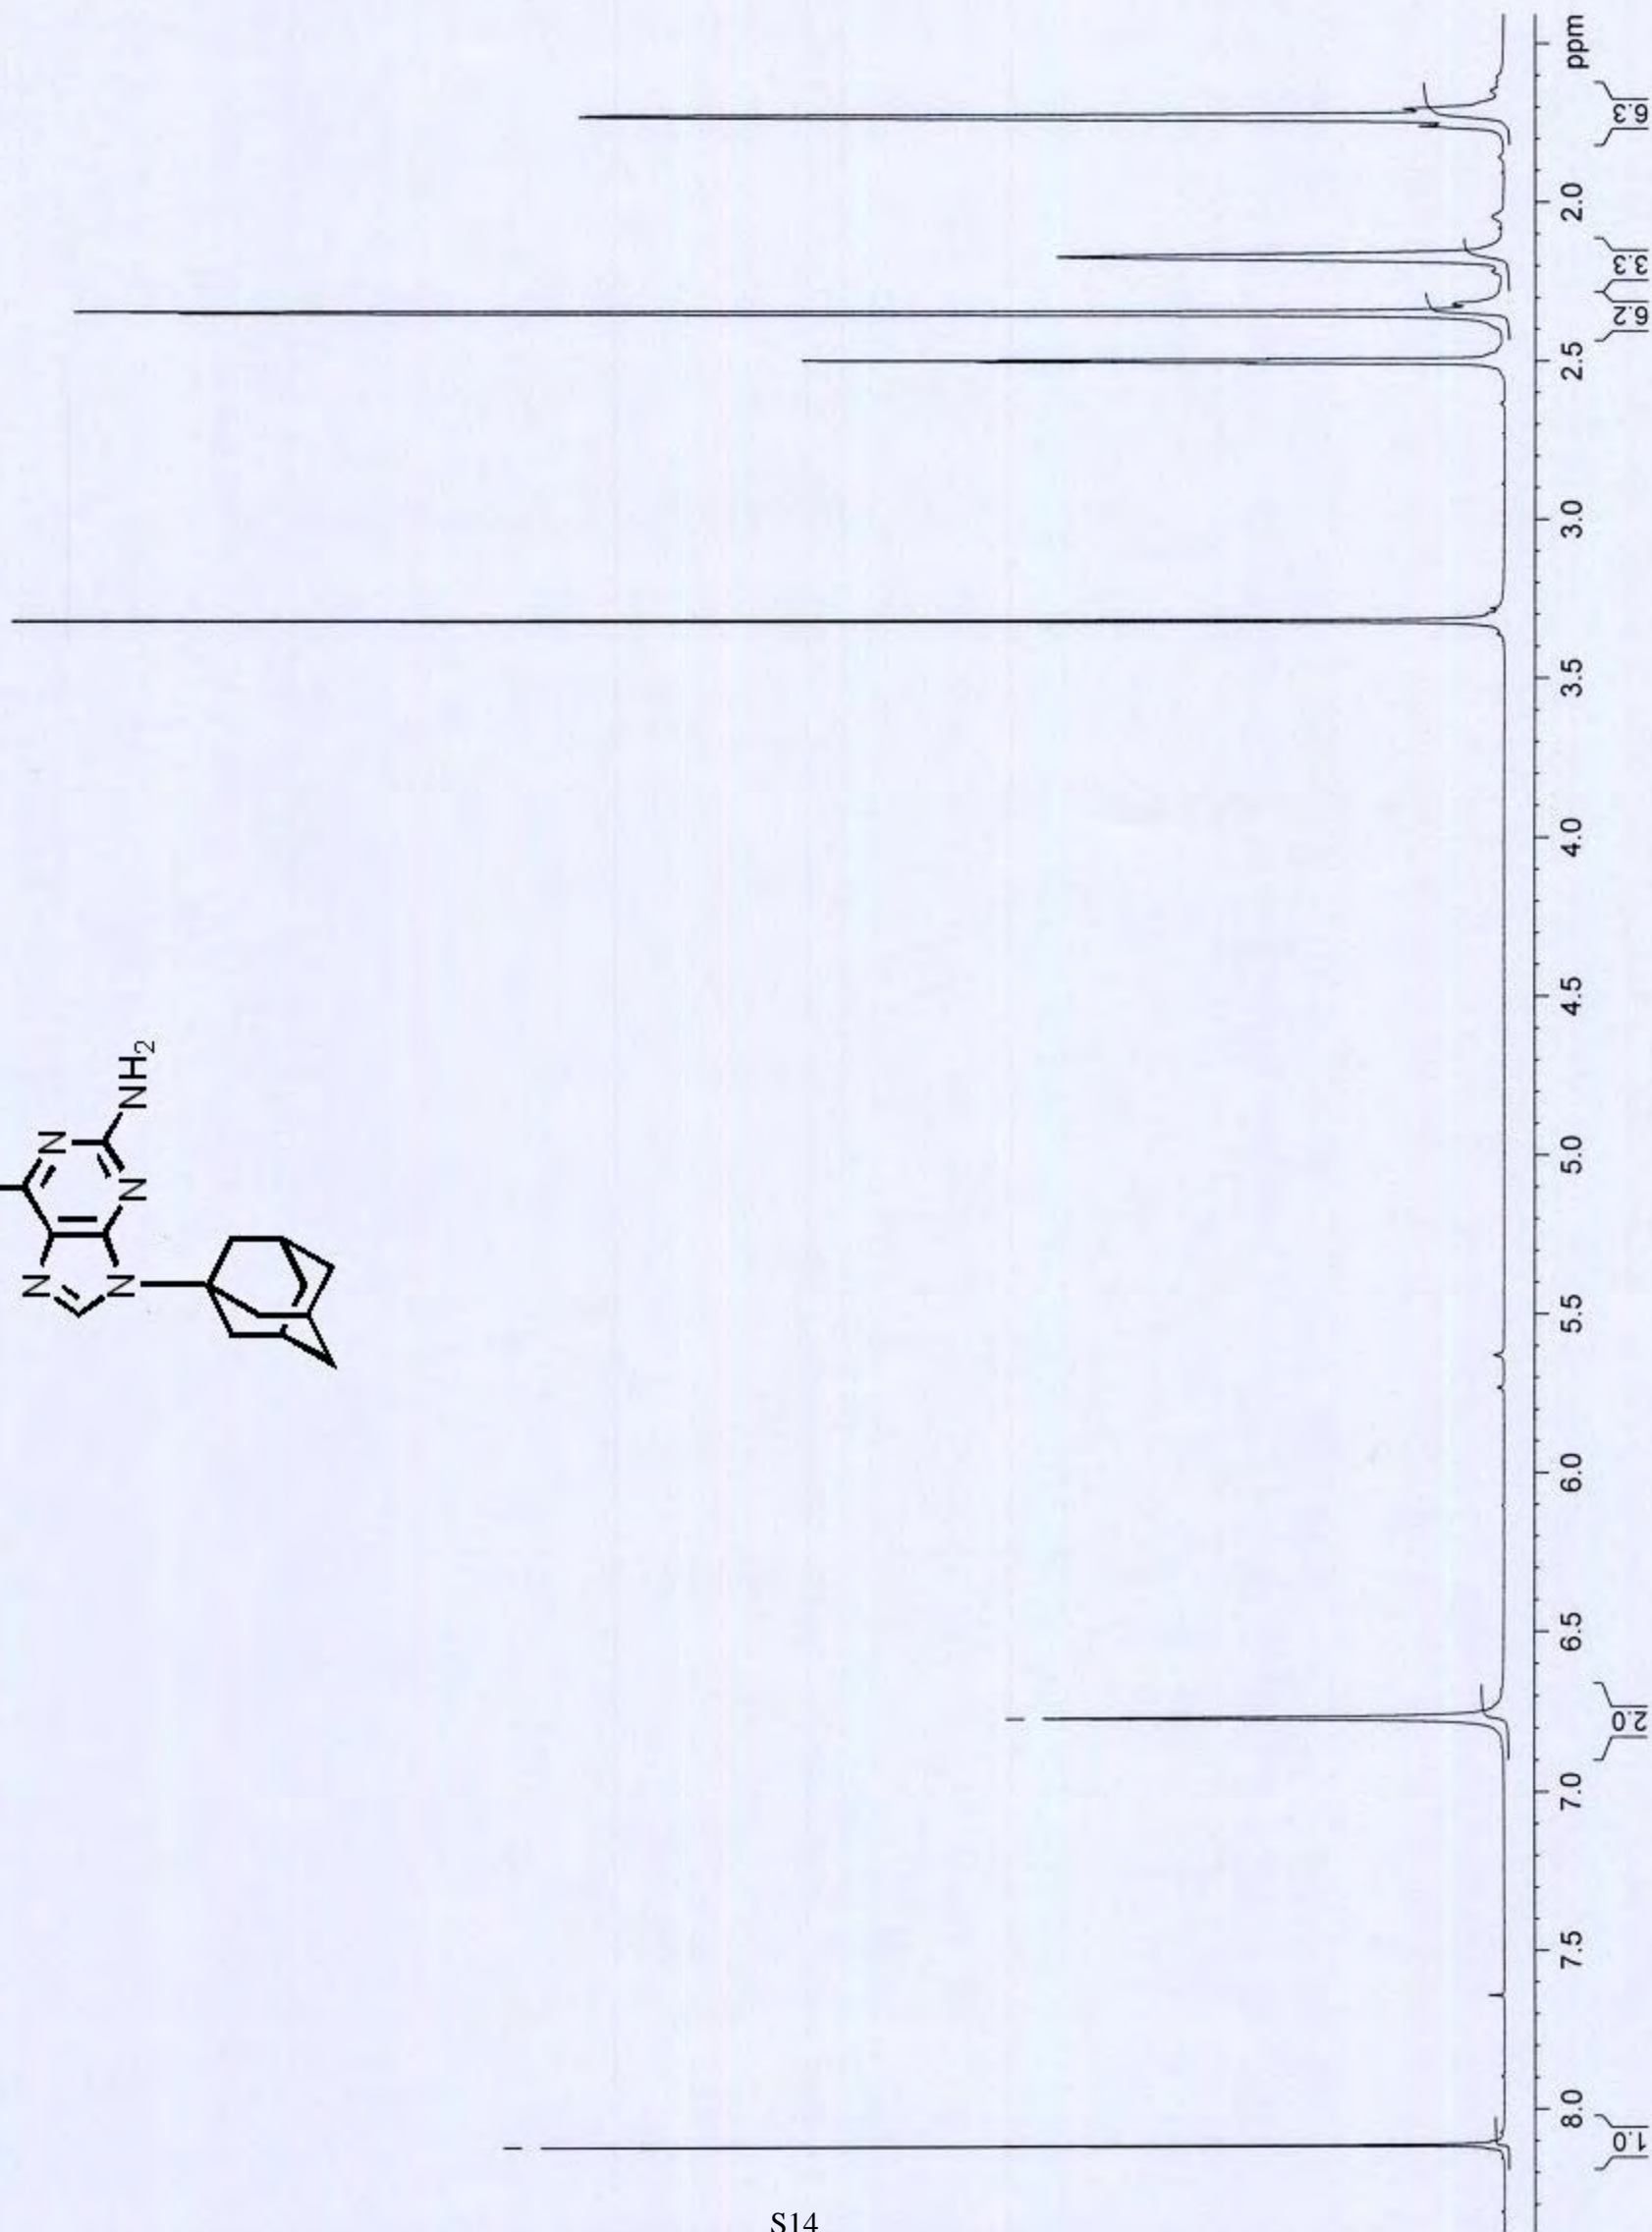

Table 2, Entry 5, Z = NH<sub>2</sub>

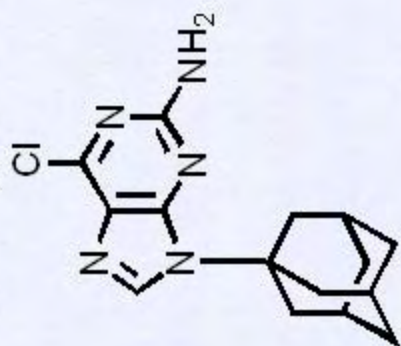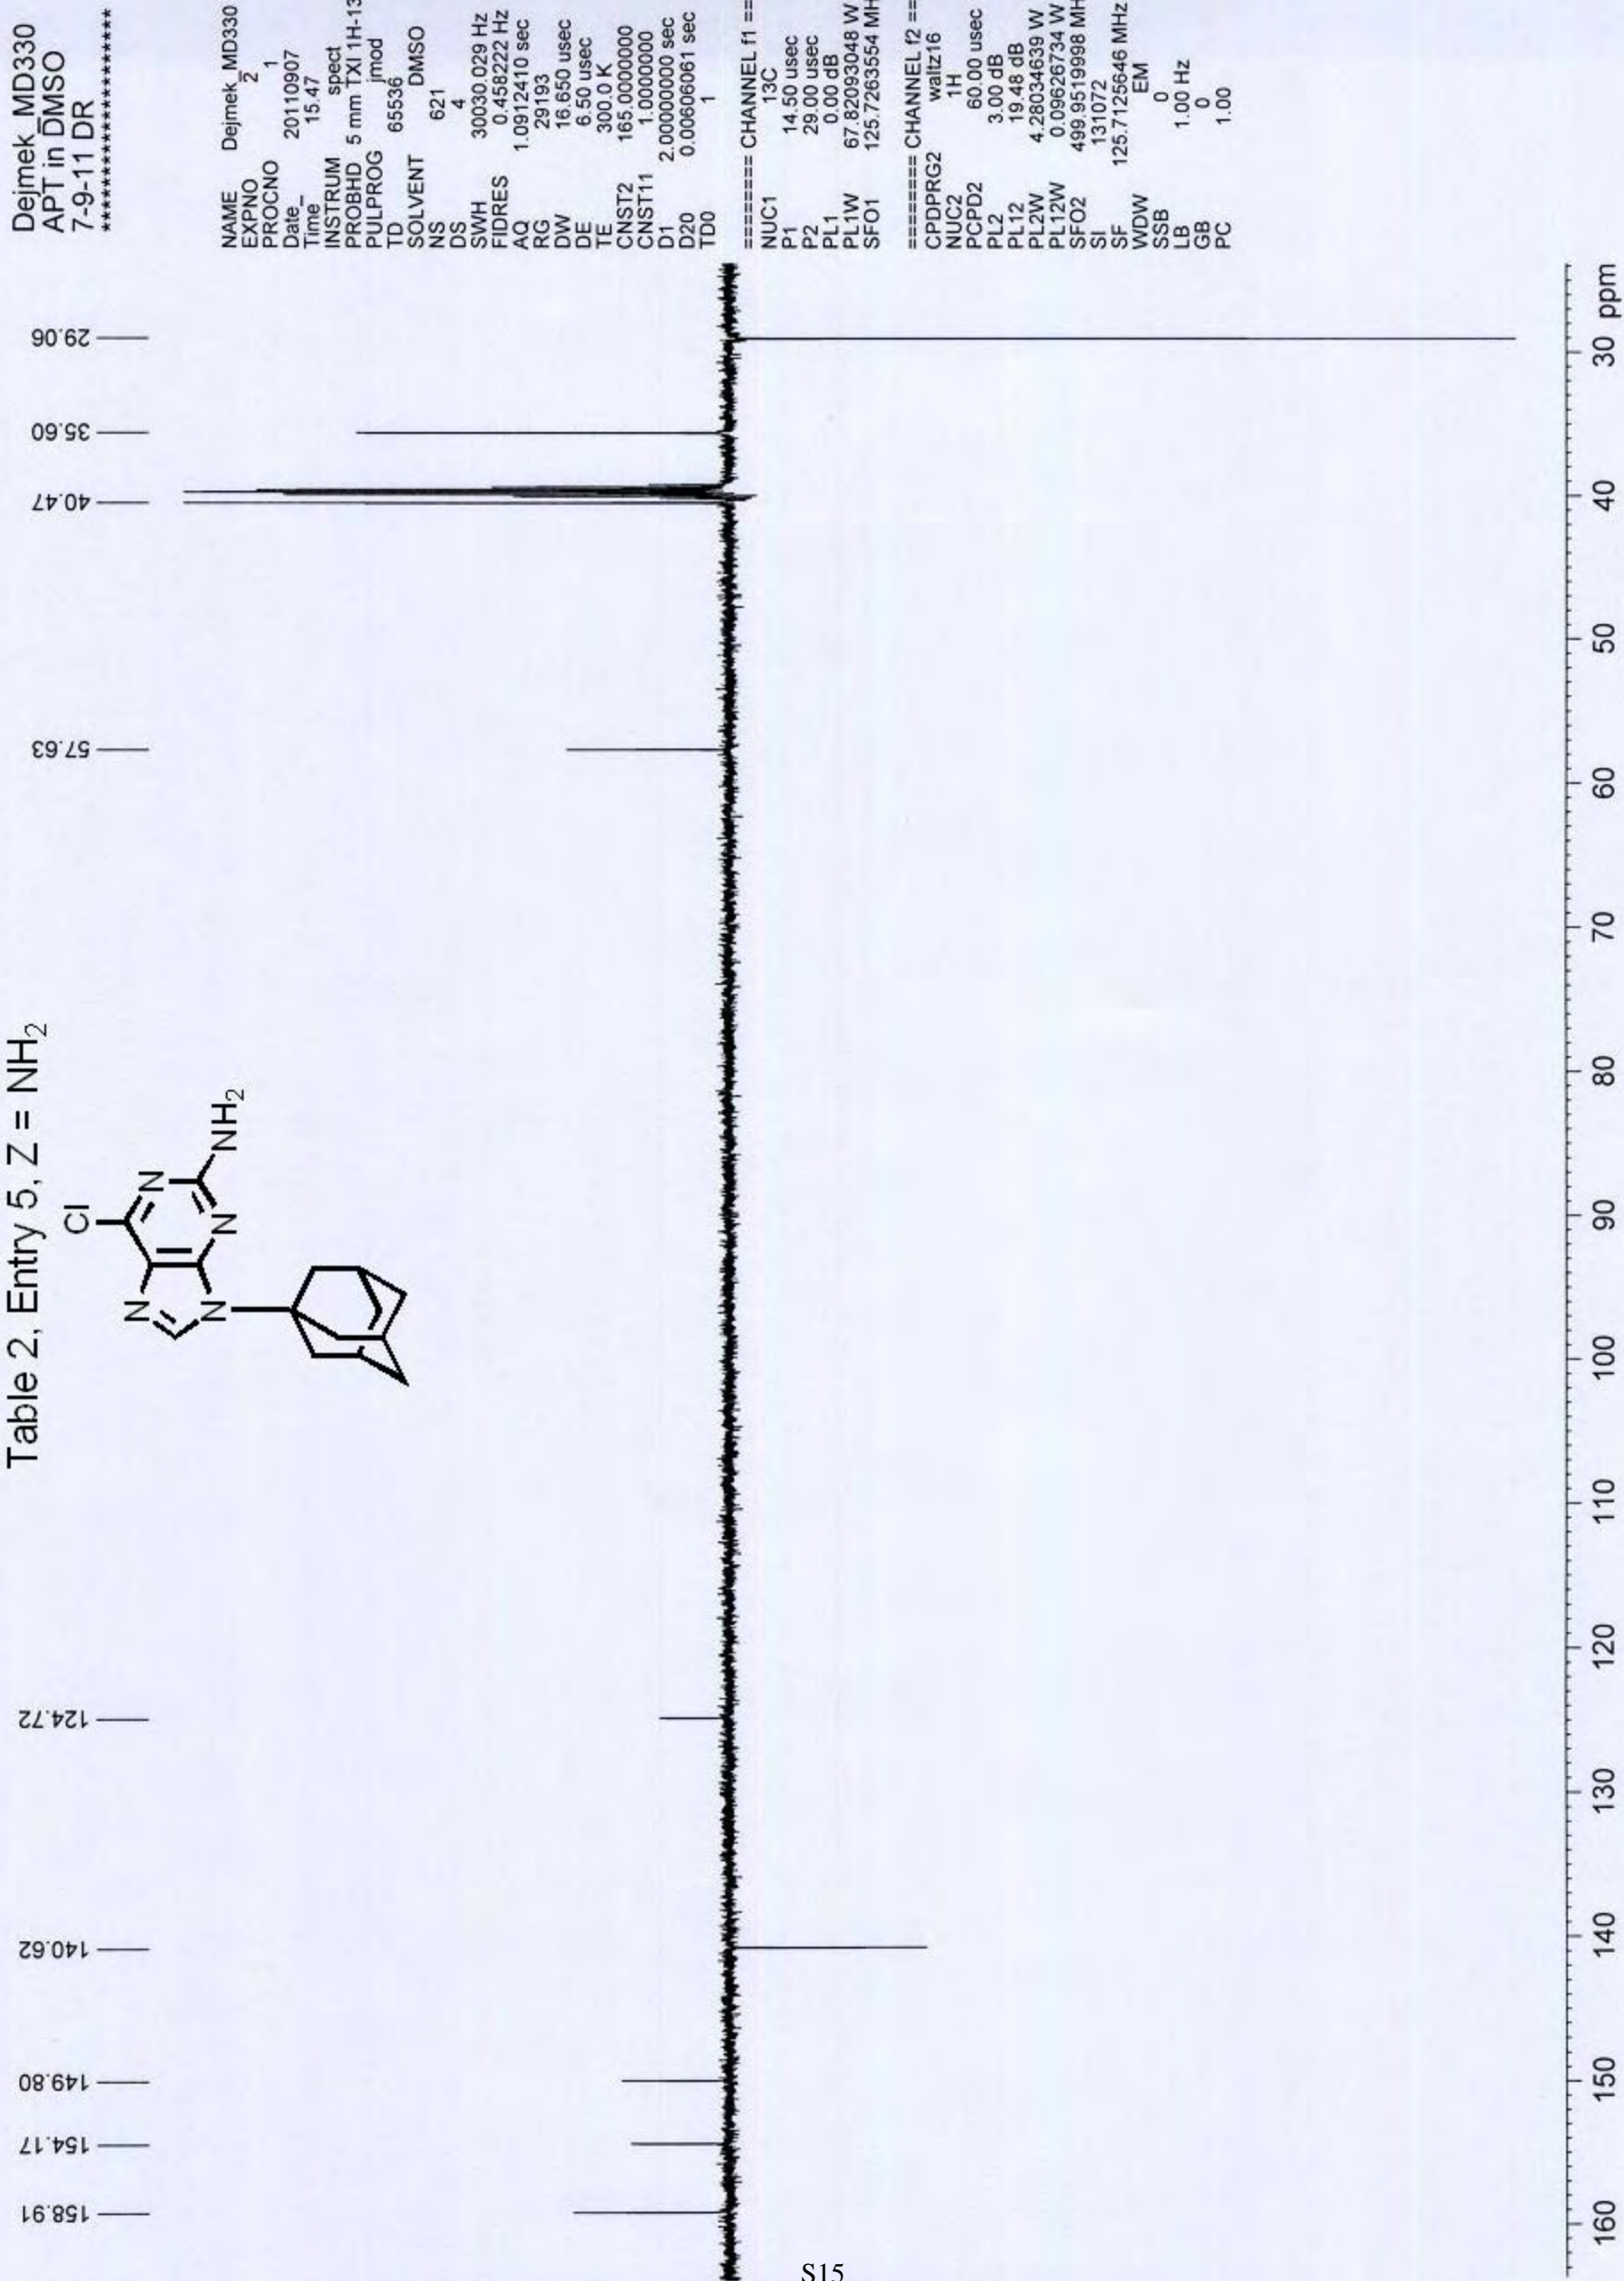

Dejmek\_MD336  
1H NMR in DMSO  
16-9-11 DR  
\*\*\*\*\*

Dejmek\_MD336  
EXPNO 1  
PROCNO 1  
Date\_ 20110916  
Time\_ 10.32  
INSTRUM spect  
PROBHD 5 mm TXI 1H-  
PULPROG zg30  
TD 60094  
SOLVENT DMSO  
NS 32  
DS 0  
SWH 7507.507 Hz  
FIDRES 0.124929 Hz  
AQ 4.0023770 sec  
RG 14.3  
DW 66.600 usec  
DE 6.00 usec  
TE 300.0 K  
D1 1.0000000 sec  
TD0 1

==== CHANNEL f1 =  
NUC1 1H  
P1 9.00 usec  
PL1 3.00 dB  
PL1W 4.28034639 V  
SFO1 499.9534997 N  
SI 131072  
SF 499.9500005 MH-  
WDW no  
SSB 0  
LB 0.00 Hz  
GB 0  
PC 1.00

Table 2, Entry 6, Z = H

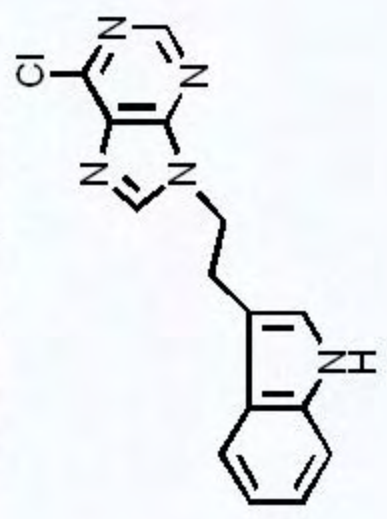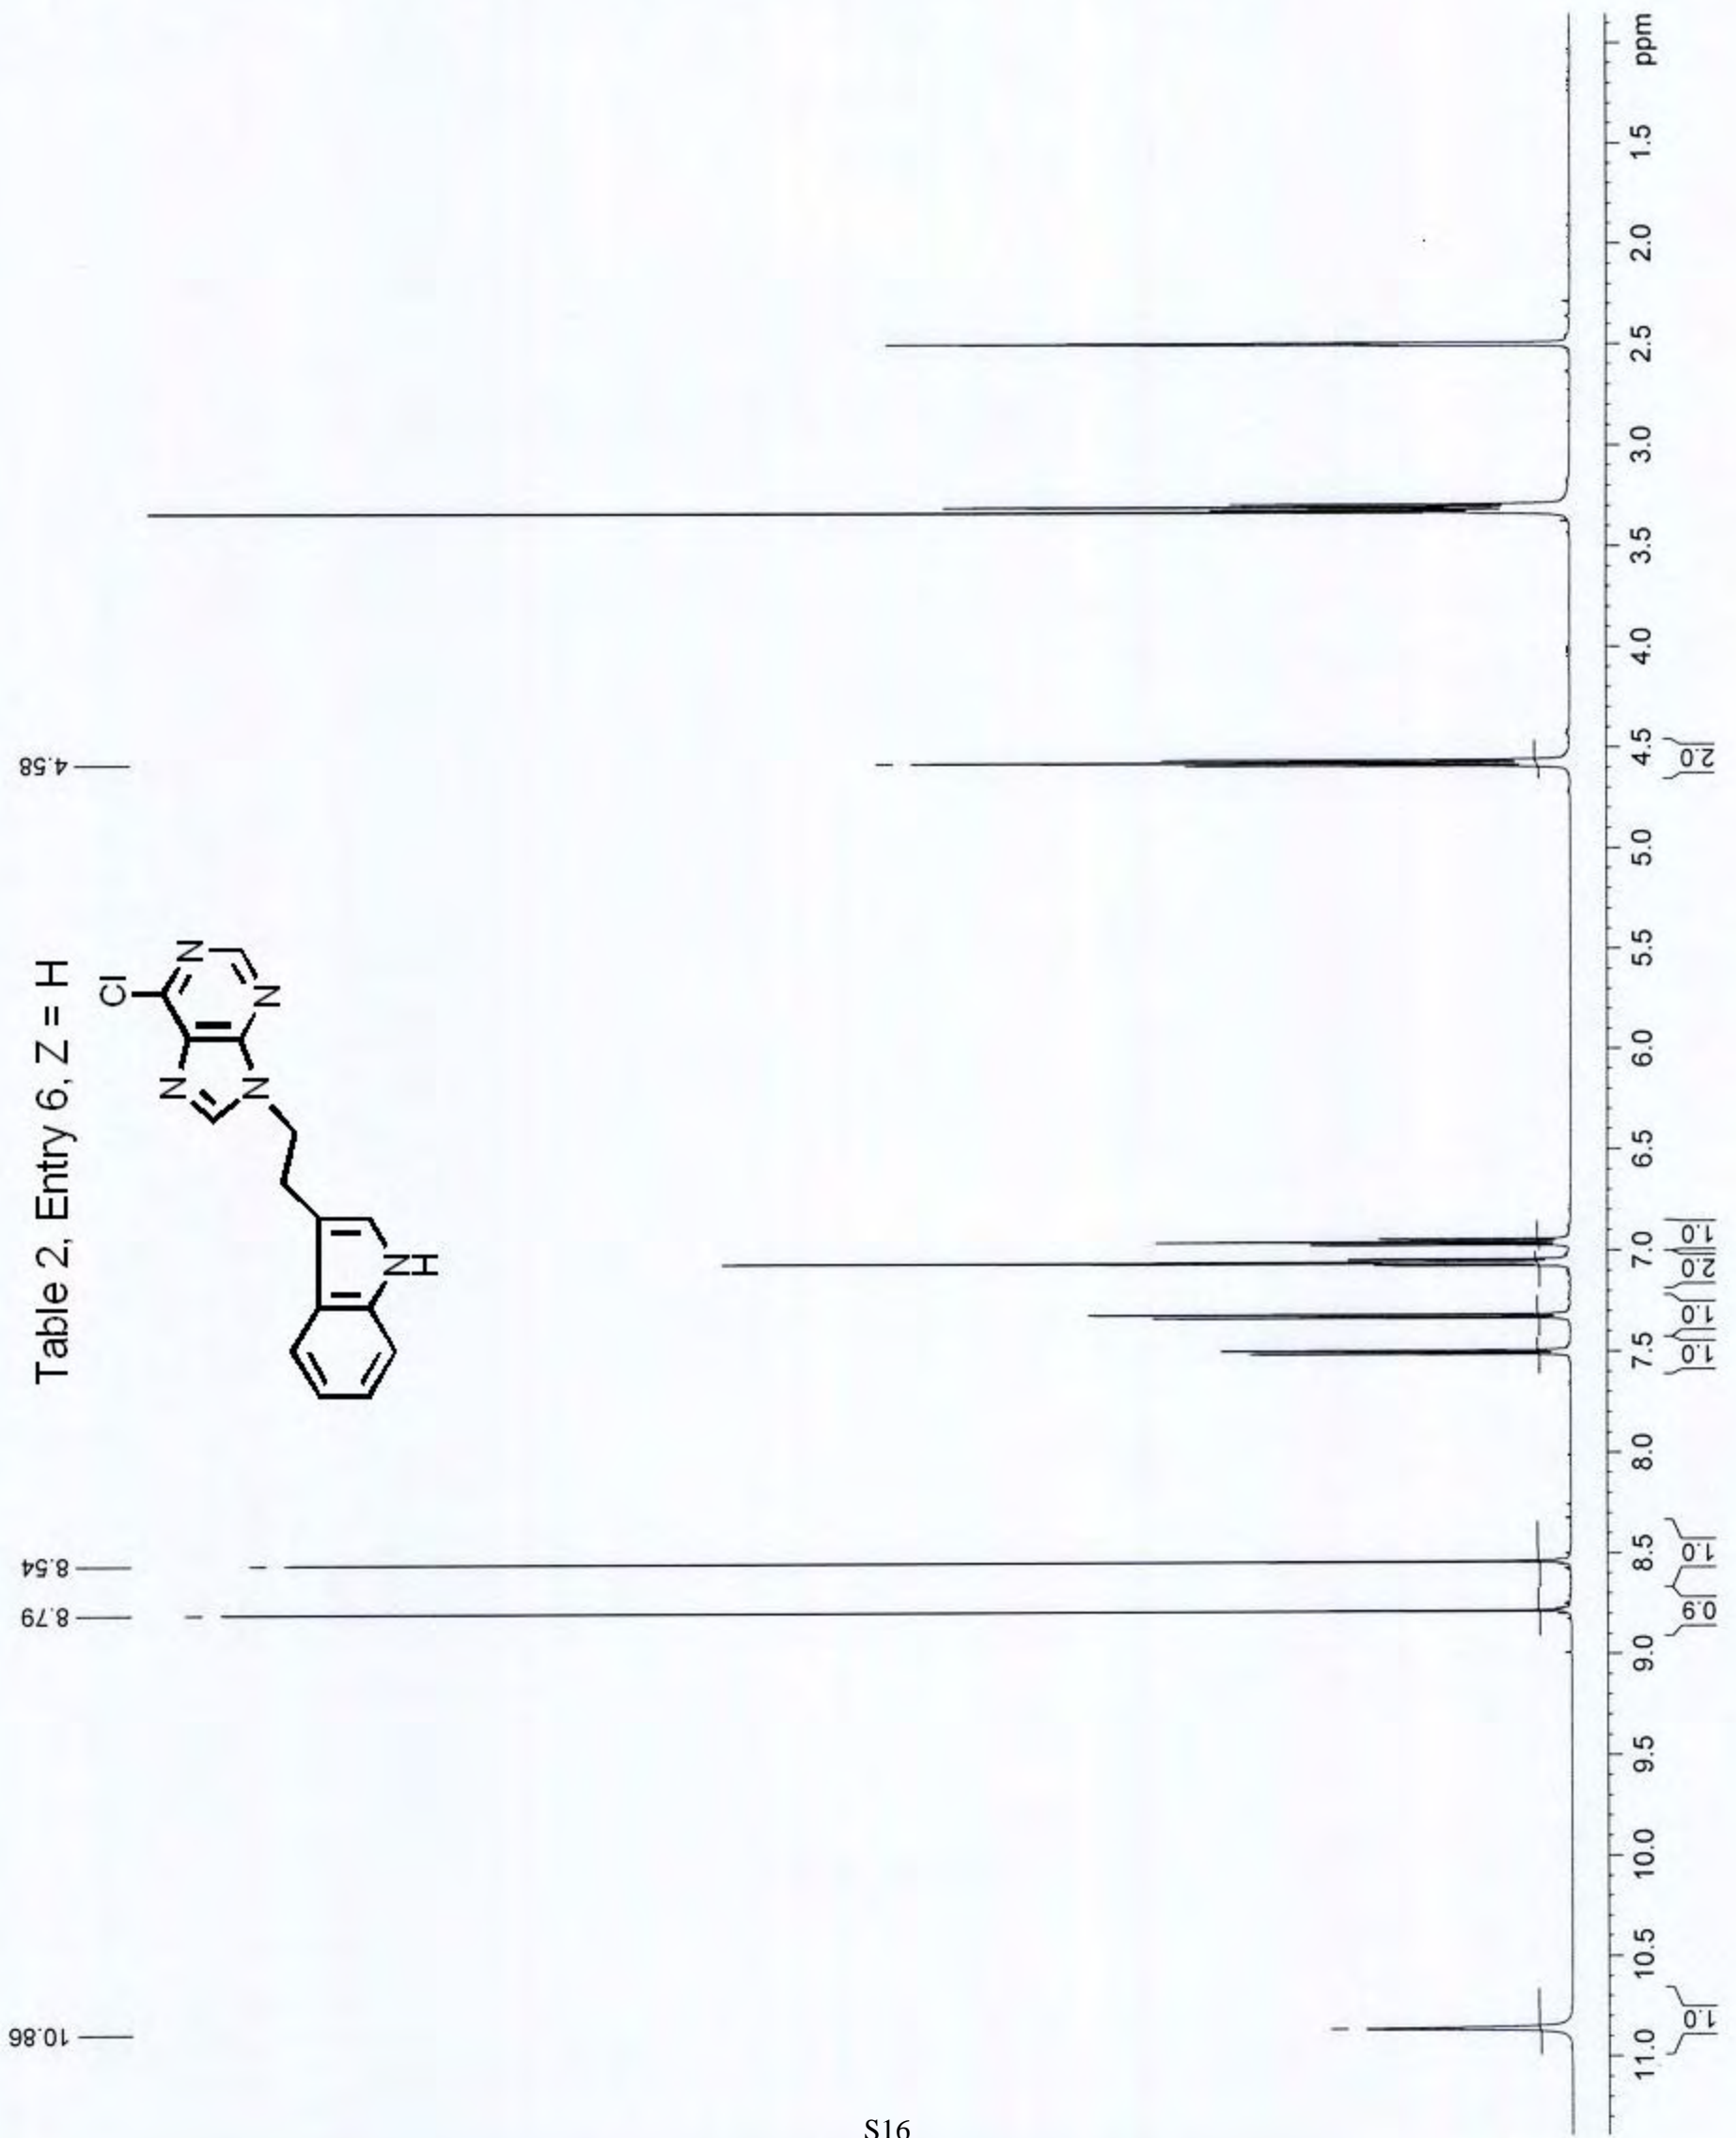



Dejmek\_MD336  
APT in DMSO  
16-9-11 DR  
\*\*\*\*\*

Table 2, Entry 6, Z = H

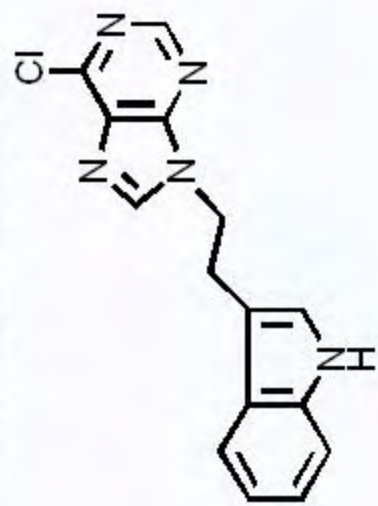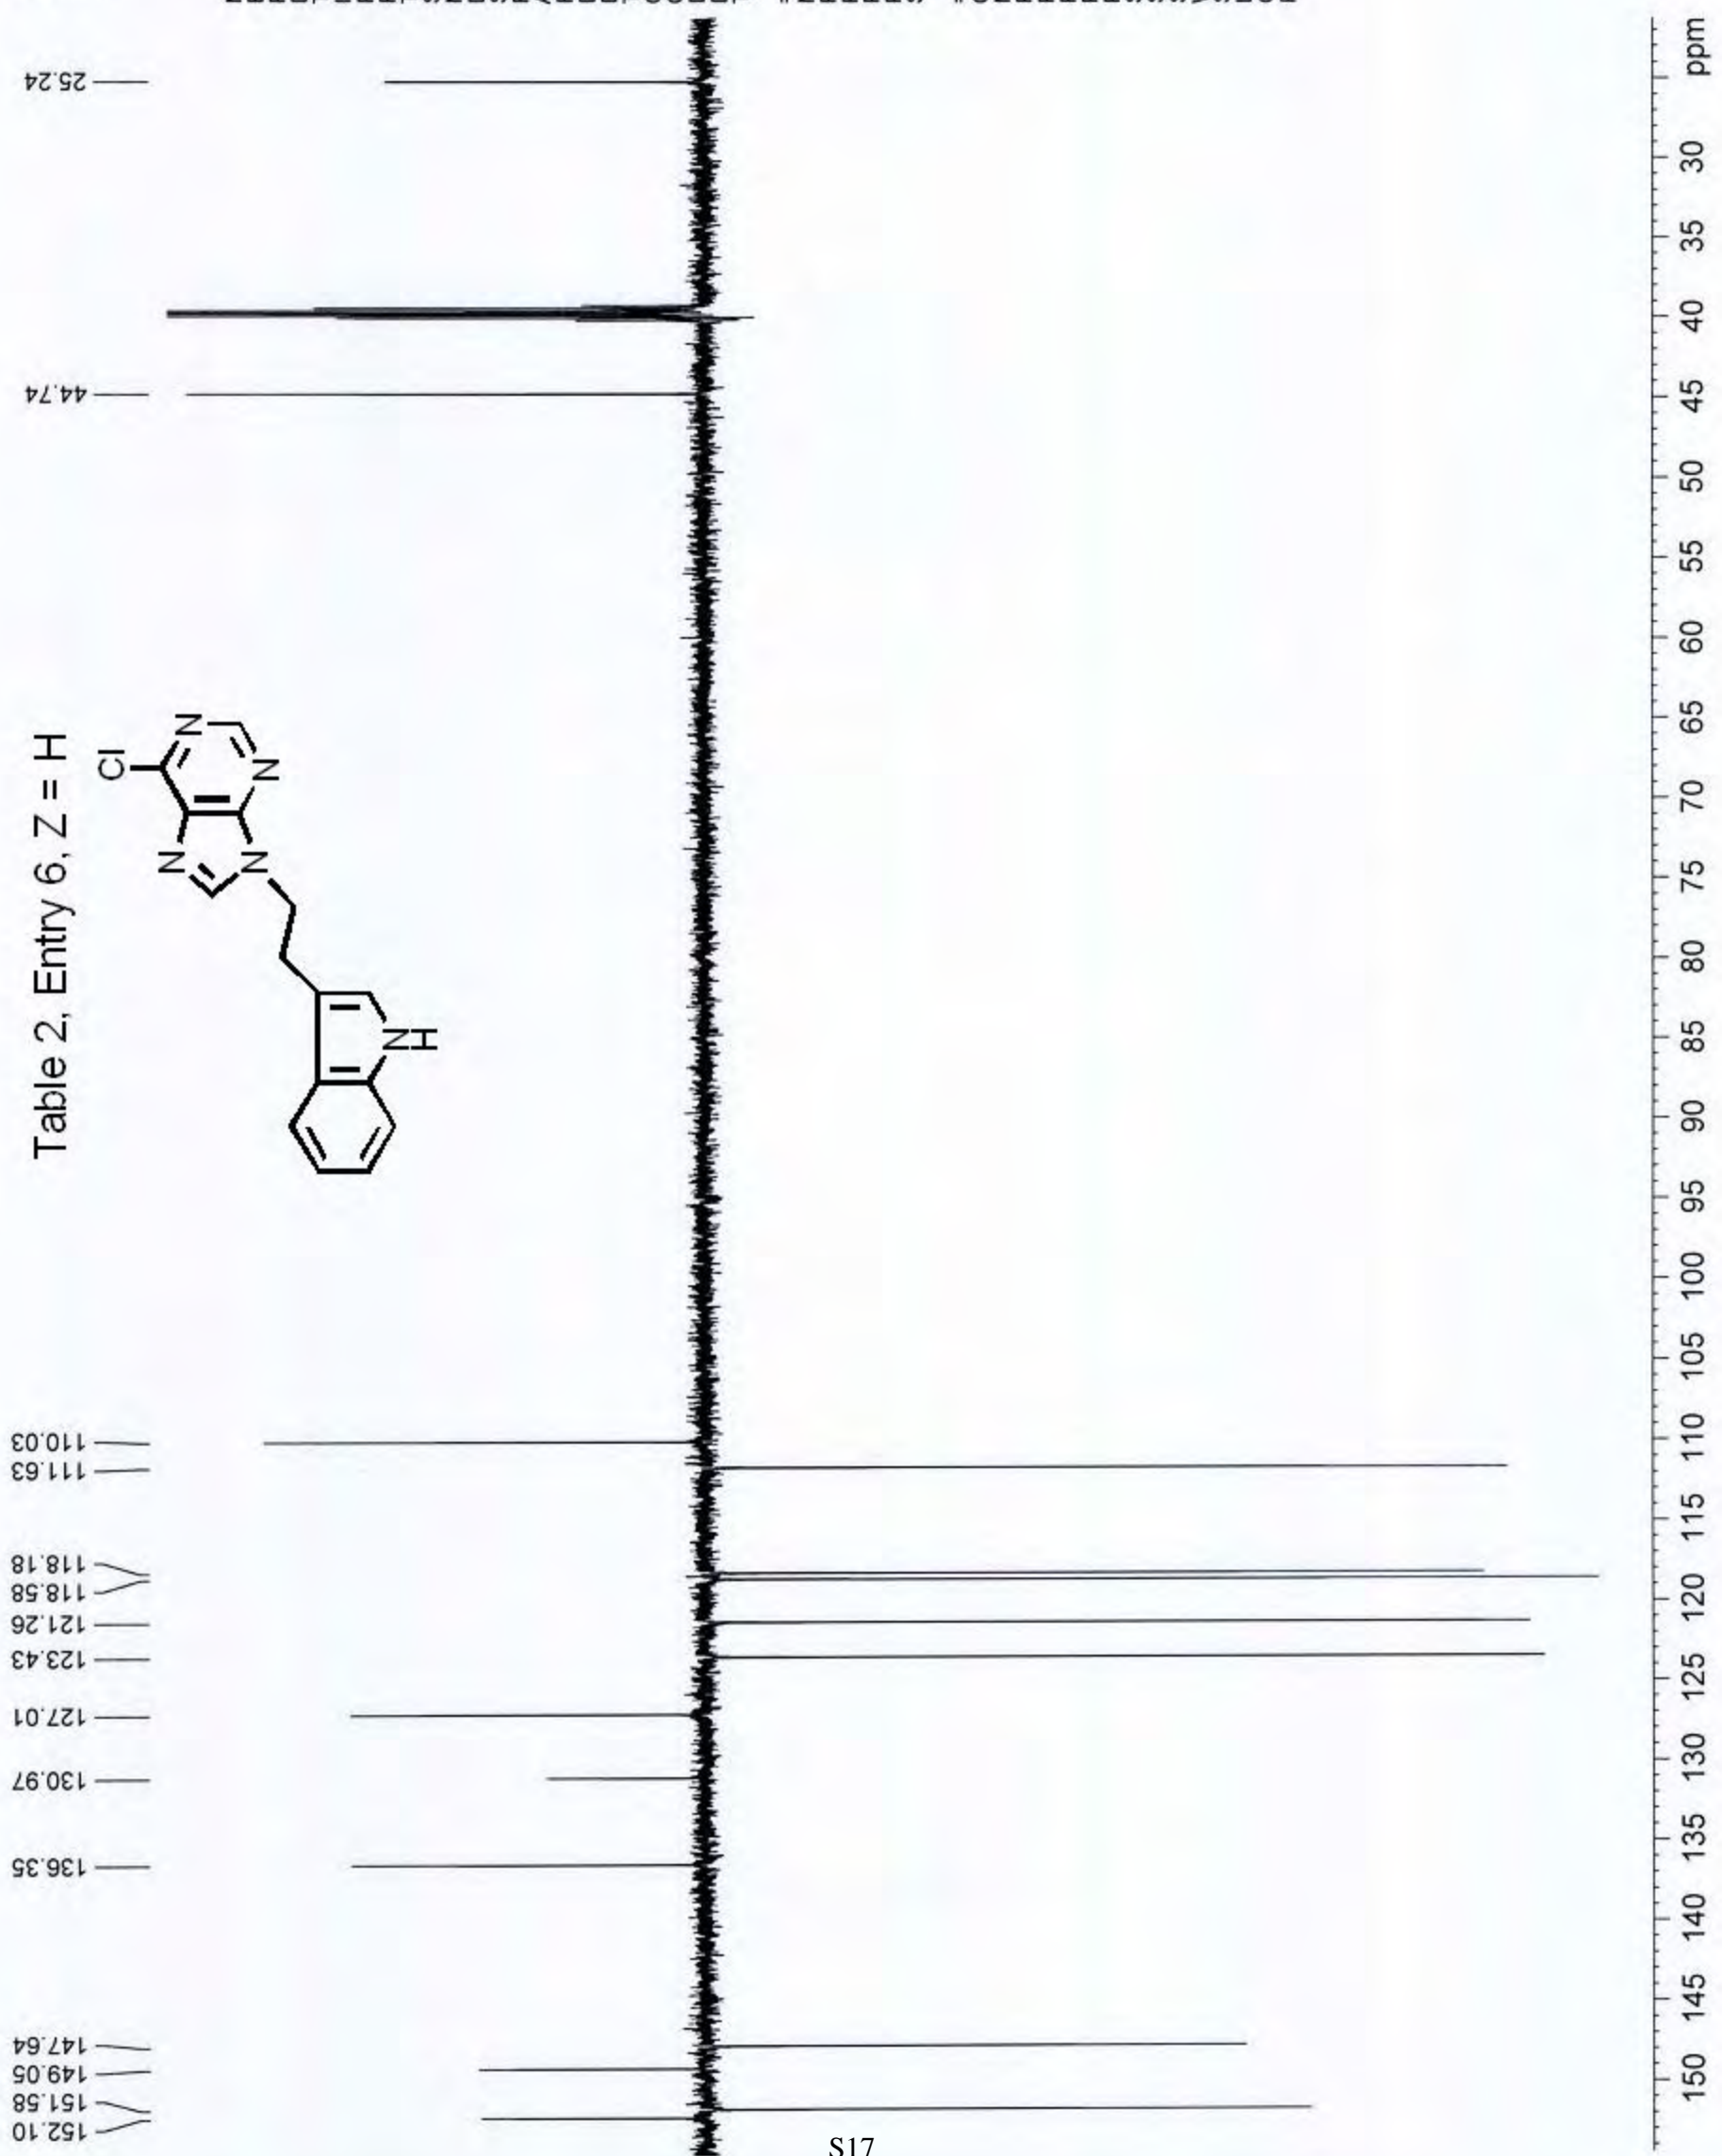

NAME Dejmek\_MD336  
EXPNO 2  
PROCNO 1  
Date\_ 20110916  
Time\_ 11.08  
INSTRUM spect  
PROBHD 5 mm TXI 1H-13  
PULPROG jmod  
TD 65536  
SOLVENT DMSO  
NS 687  
DS 4  
SWH 30030.029 Hz  
FIDRES 0.458222 Hz  
AQ 1.0912410 sec  
RG 29193  
DW 16.650 usec  
DE 6.50 usec  
TE 300.0 K  
CNST2 165.0000000  
CNST11 1.0000000  
D1 2.0000000 sec  
D20 0.00606061 sec  
TD0 1

==== CHANNEL f1 =====  
NUC1 13C  
P1 14.50 usec  
P2 29.00 usec  
PL1 0.00 dB  
PL1W 67.82093048 W  
SFO1 125.7263554 MHz  
==== CHANNEL f2 =====  
CPDPRG2 waltz16  
NUC2 1H  
PCPD2 60.00 usec  
PL2 3.00 dB  
PL12 19.48 dB  
PL2W 4.28034639 W  
PL12W 0.09626734 W  
SFO2 499.9519998 MHz  
SI 131072  
SF 125.7125654 MHz  
WDW EM  
SSB 0  
LB 1.00 Hz  
GB 0  
PC 1.00

Table 2, Entry 6, Z = NH<sub>2</sub>

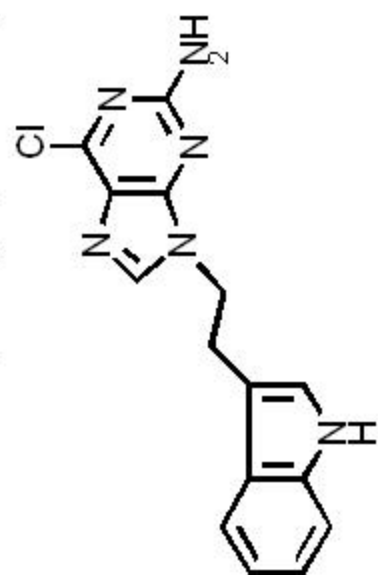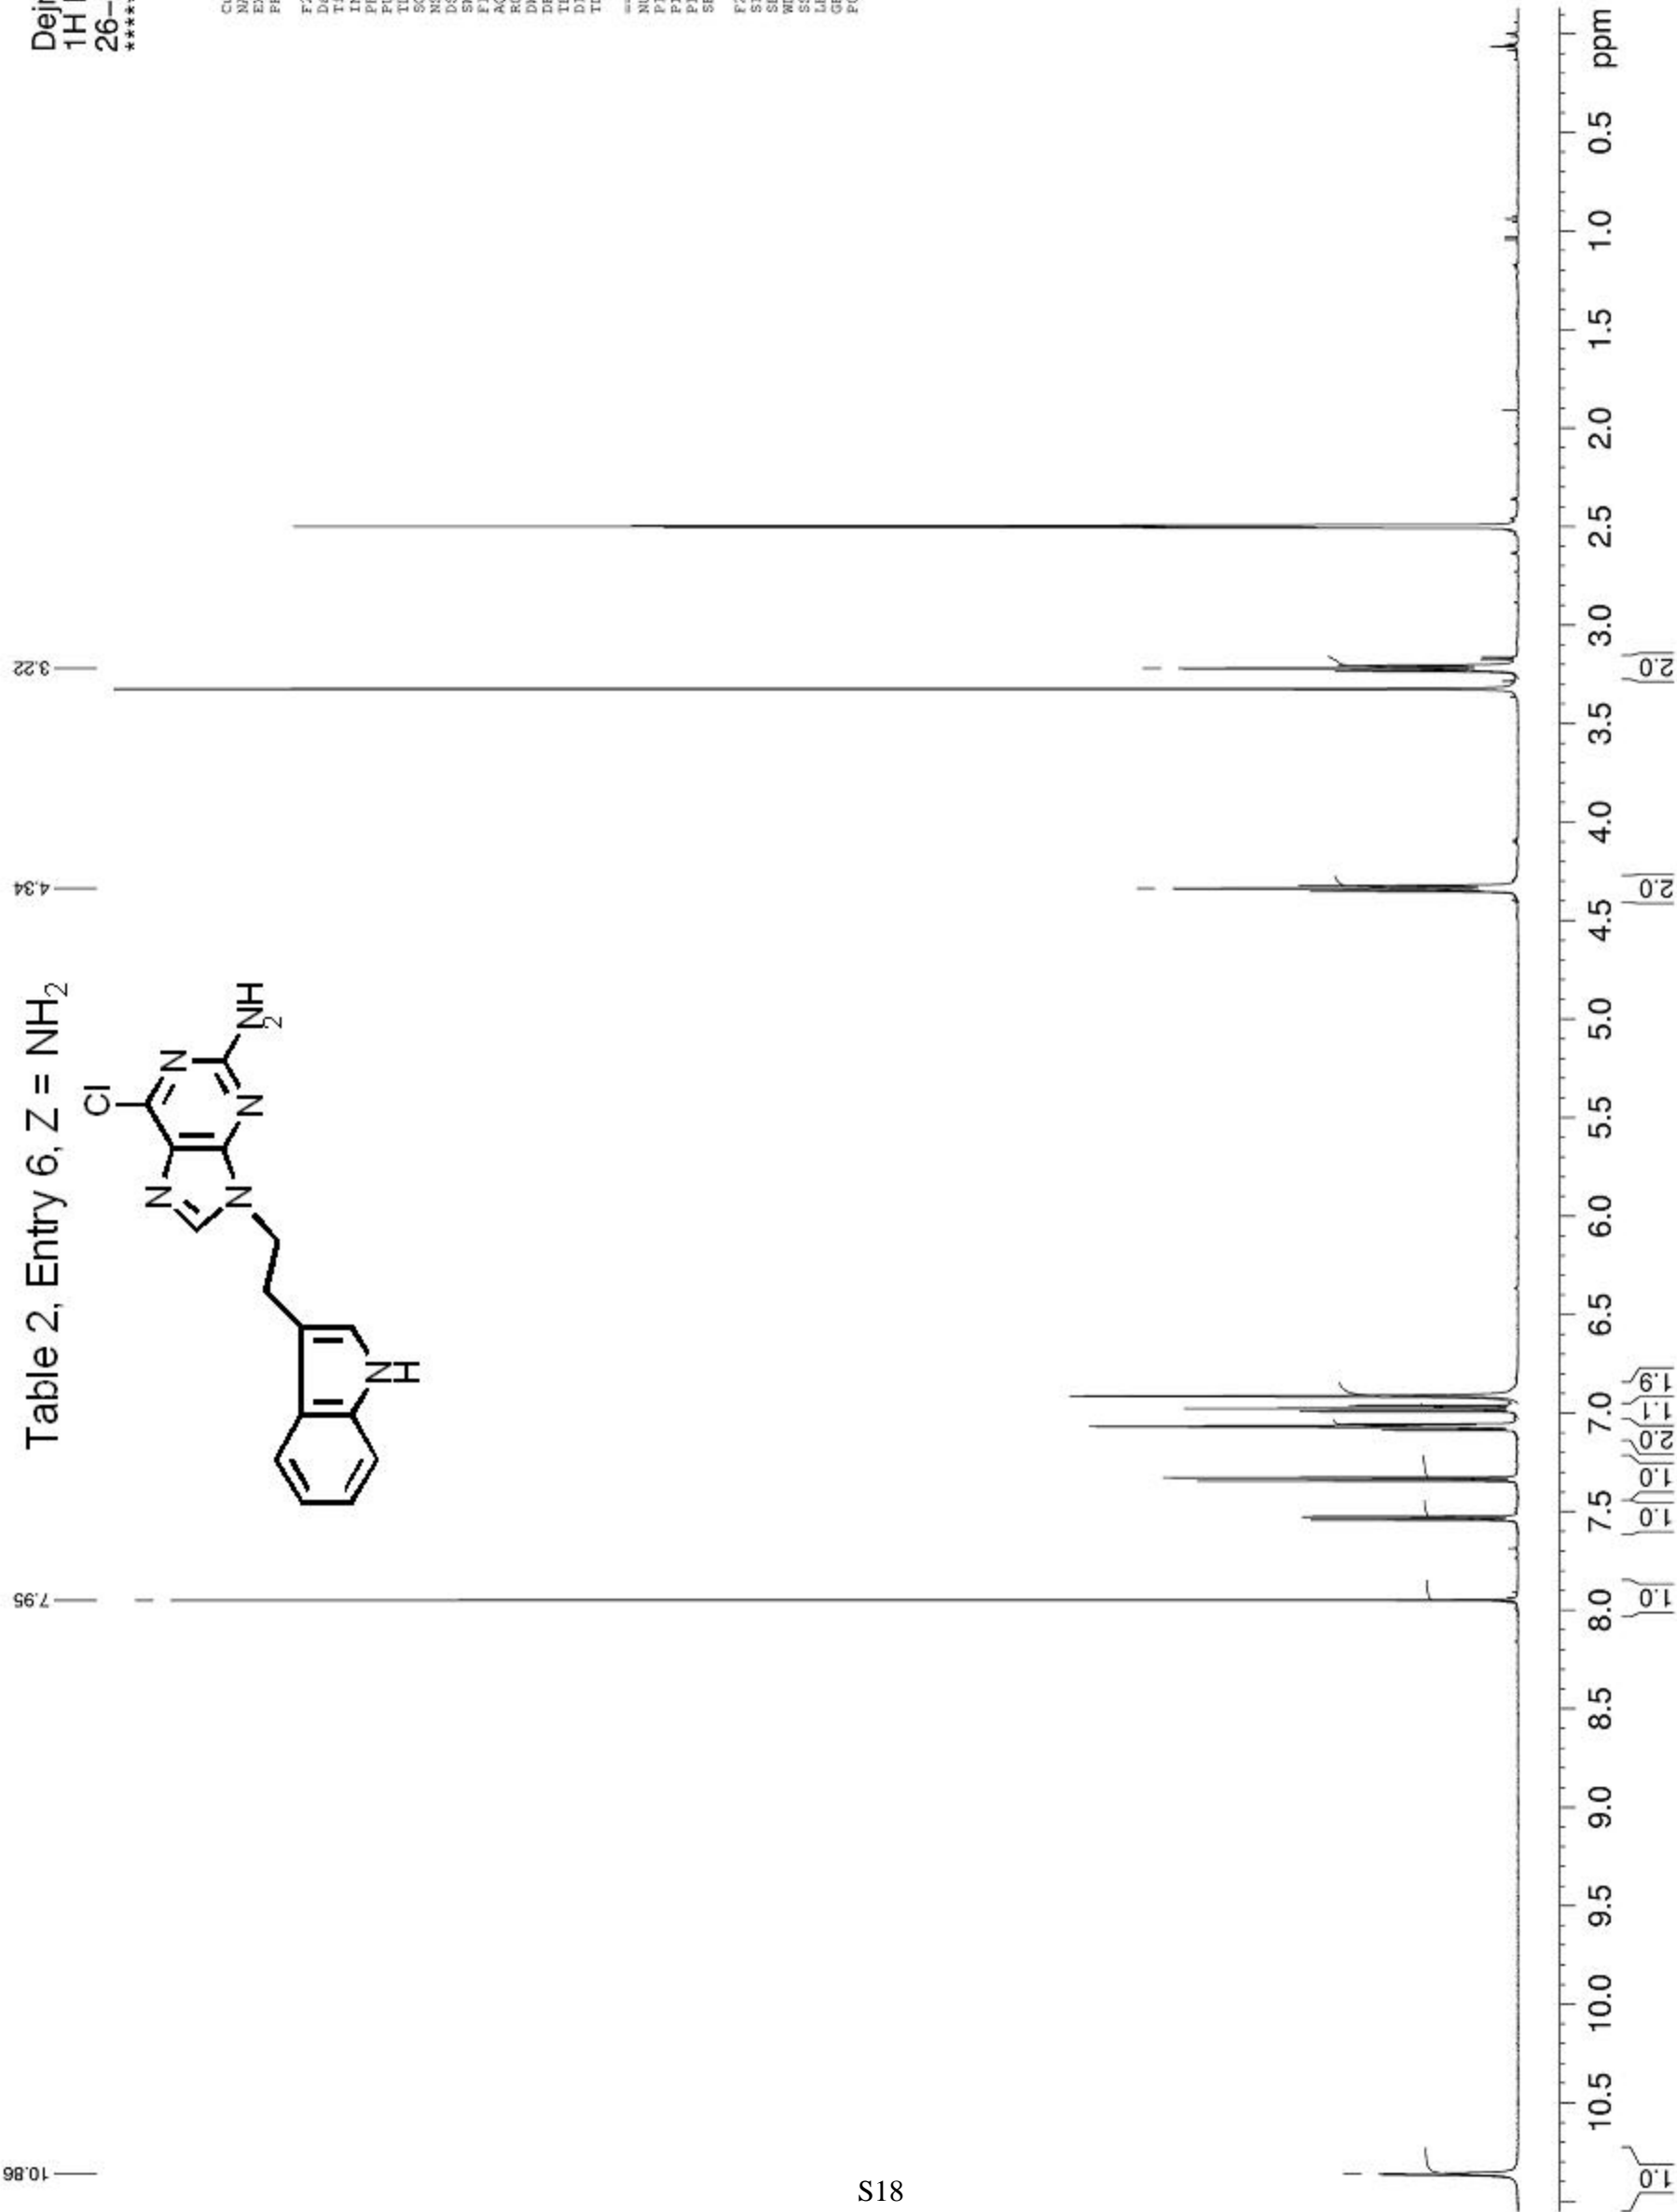

Dejmek\_MD332  
1H NMR in DMSO  
26-9-11 DR  
\*\*\*\*\*

Current Data Parameters  
NAME Dejmek\_MD332  
EXPNO 1  
PROCNO 1  
F2 - Acquisition Parameters  
Date\_ 20110926  
Time 15.59  
INSTRUM spect  
PROBHD 5 mm TXI 1H-13  
PULPROG zg30  
TD 60094  
SOLVENT DMSO  
NS 32  
DS 0  
SWH 7507.507 Hz  
FIDRES 0.124929 Hz  
AQ 4.0023770 sec  
RG 14.3  
DM 66.600 usec  
DE 6.00 usec  
TE 300.0 K  
D1 1.00000000 sec  
TD0 1  
===== CHANNEL f1 =====  
NUC1 1H  
P1 9.00 usec  
PL1 3.00 dB  
PL1W 4.28034639 W  
SFO1 499.9534997 MHz  
F2 - Processing parameters  
SI 131072  
SF 499.9500006 MHz  
WDW nc  
SSB 0  
LB 0.00 Hz  
GB 0  
FC 1.00

Table 2, Entry 6, Z = NH<sub>2</sub>

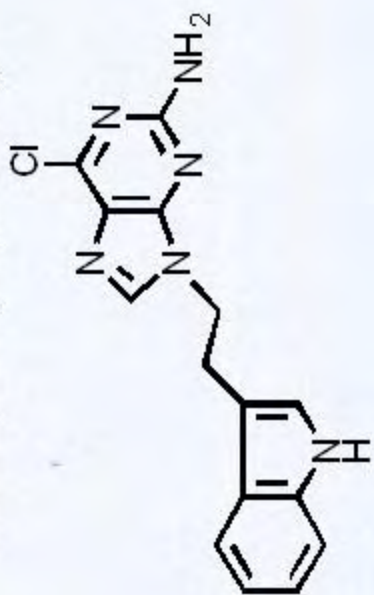

Dejmek\_MD332  
 APT in DMSO  
 26-9-11 DR  
 \*\*\*\*\*

NAME Dejmek\_MD332  
 EXPNO 2  
 PROCNO 1  
 Date\_ 20110926  
 Time\_ 16.26  
 INSTRUM spect  
 PROBHD 5 mm TXI 1H-13  
 PULPROG jmod  
 TD 65536  
 SOLVENT DMSO  
 NS 493  
 DS 4  
 SWH 30030.029 Hz  
 FIDRES 0.458222 Hz  
 AQ 1.0912410 sec  
 RG 29193  
 DW 16.650 usec  
 DE 6.50 usec  
 TE 300.0 K  
 CNST2 165.0000000  
 CNST11 1.0000000  
 D1 2.00000000 sec  
 D20 0.00606061 sec  
 TD0 1

==== CHANNEL f1 =====  
 NUC1 13C  
 P1 14.50 usec  
 P2 29.00 usec  
 PL1 0.00 dB  
 PL1W 67.82093048 W  
 SFO1 125.7263554 MHz

==== CHANNEL f2 =====  
 CPDPRG2 waltz16  
 NUC2 1H  
 PCPD2 60.00 usec  
 PL2 3.00 dB  
 PL12 19.48 dB  
 PL2W 4.28034639 W  
 PL12W 0.09626734 W  
 SFO2 499.9519998 MHz  
 SI 131072  
 SF 125.7125655 MHz  
 WDW EM  
 SSB 0  
 LB 1.00 Hz  
 GB 0  
 PC 1.00

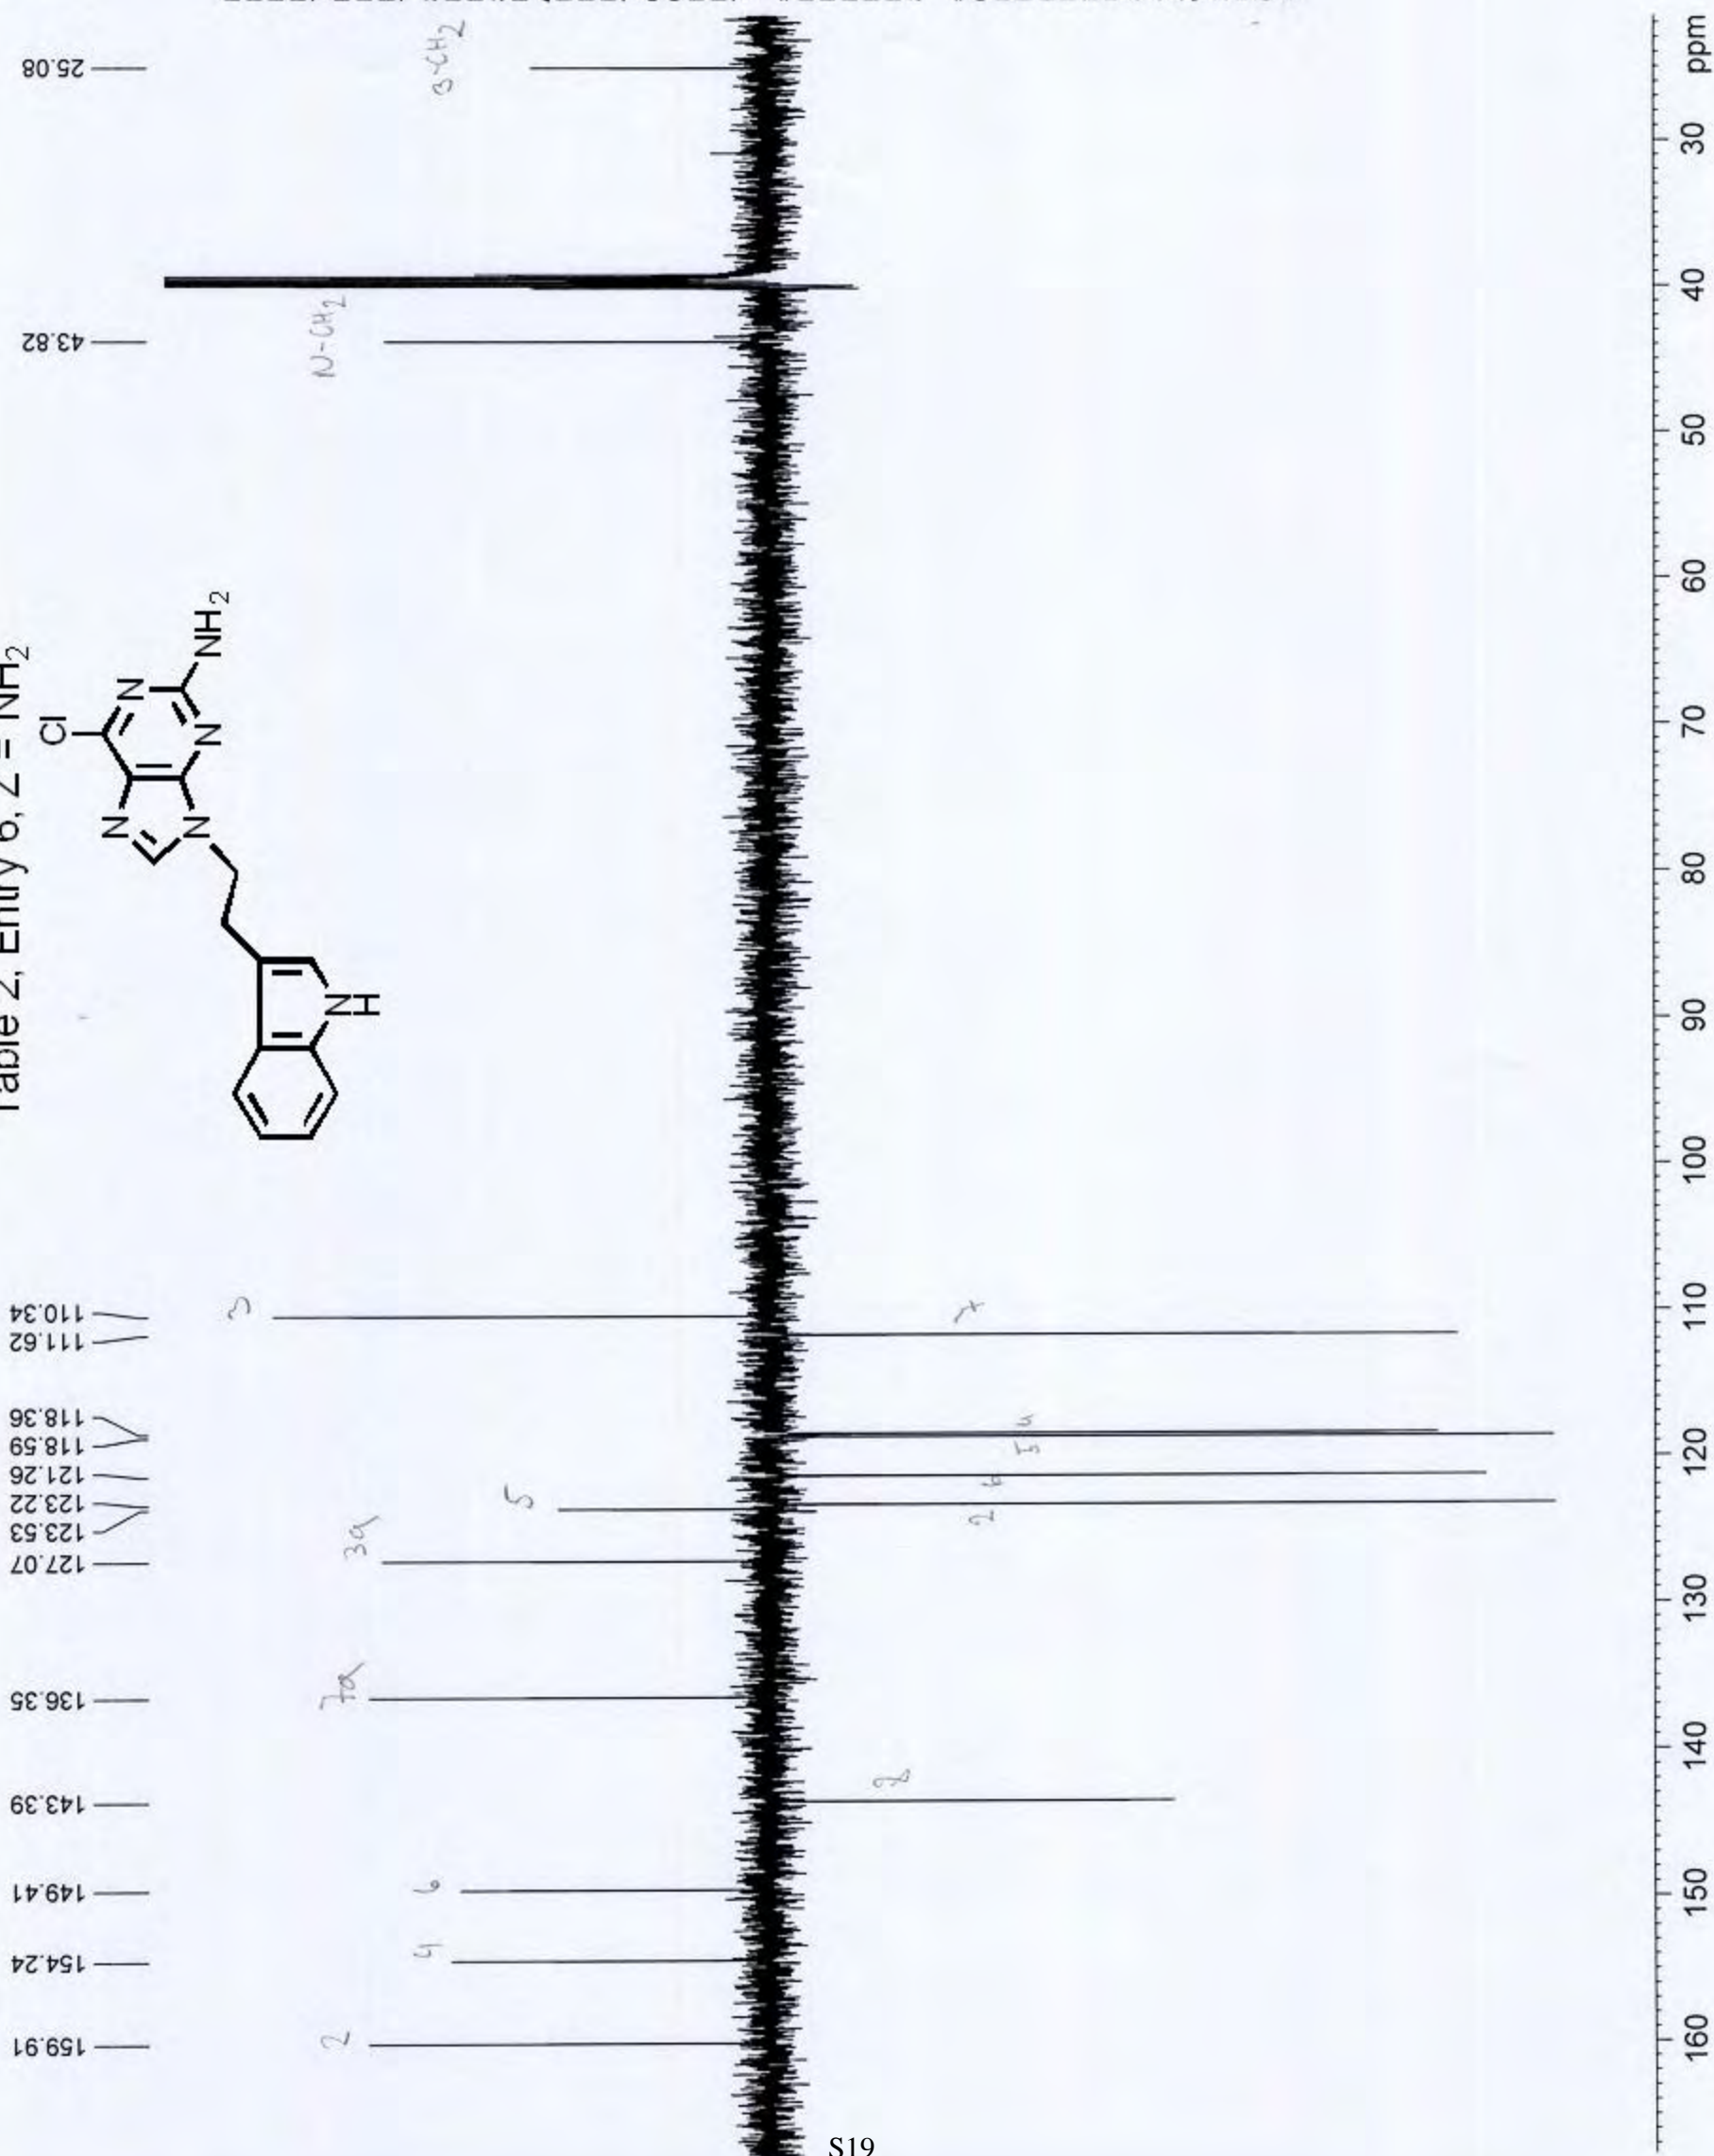

Table 2, Entry 7, Z = H

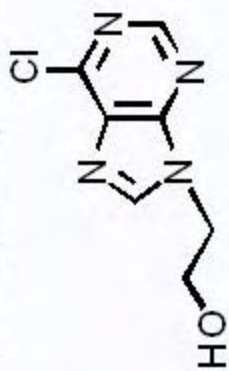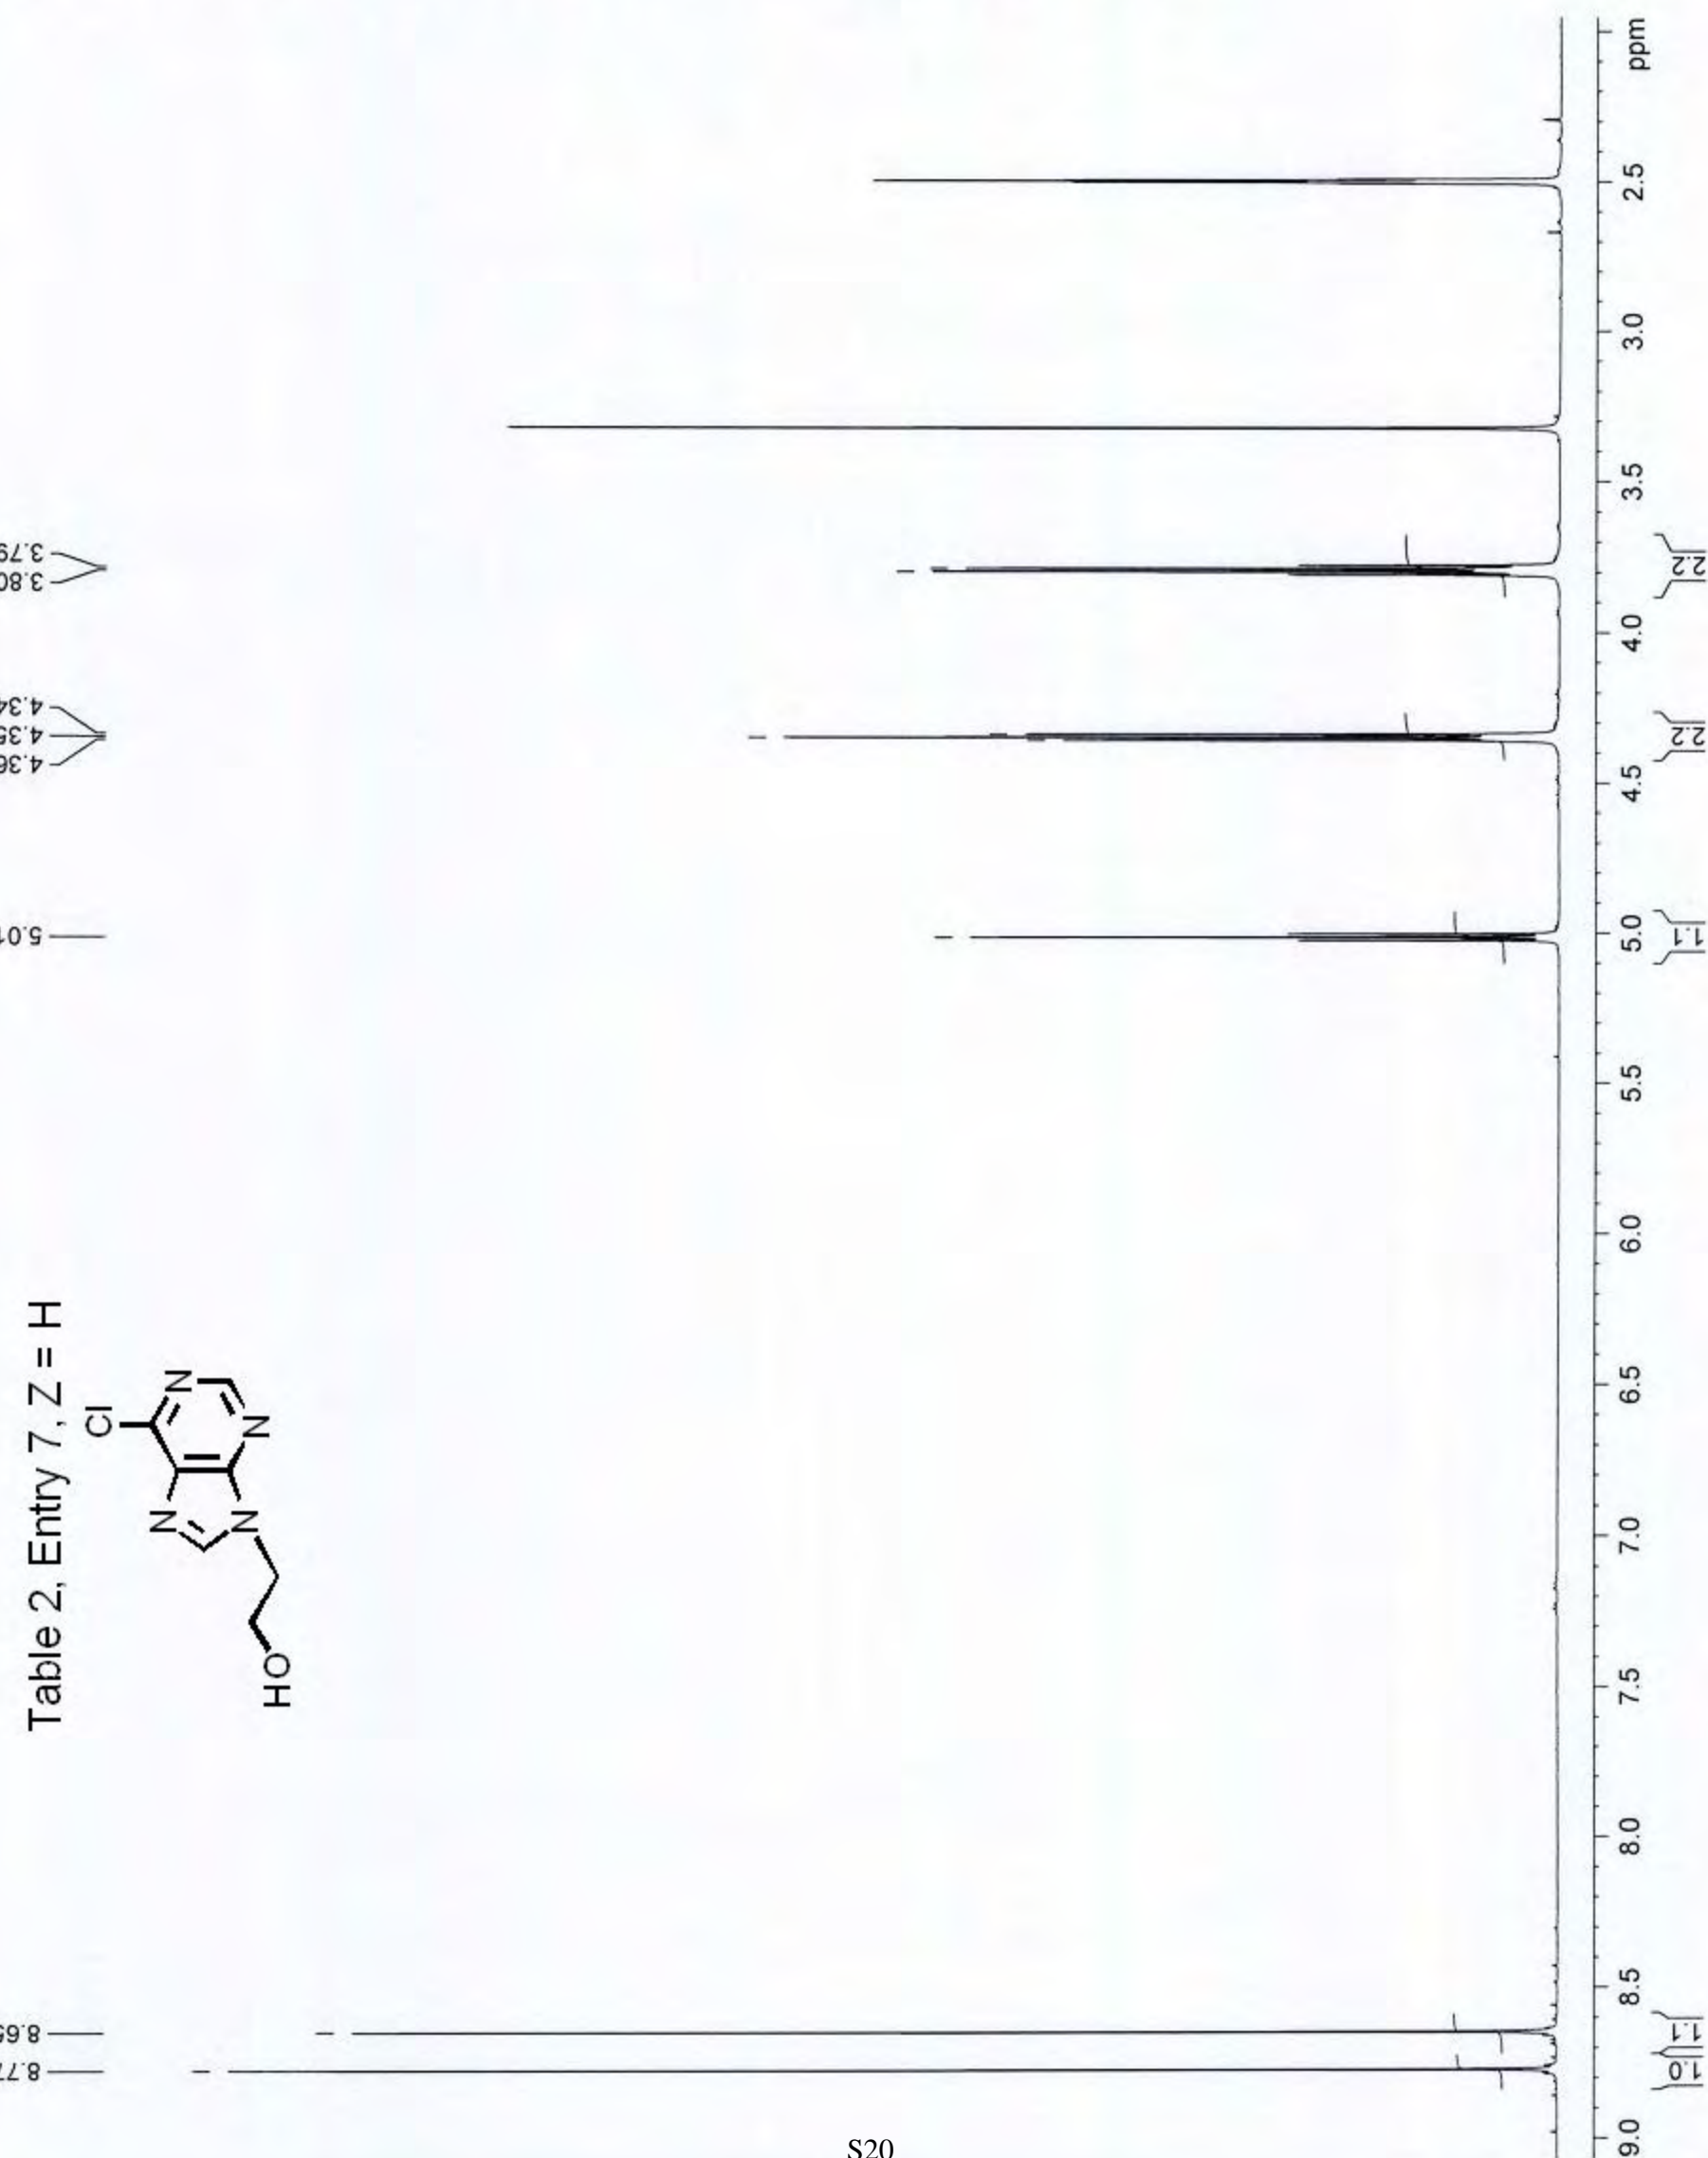

Dejmek\_MD337  
1H NMR in DMSO  
16-9-11 DR  
\*\*\*\*\*

NAME Dejmek\_MD337  
EXPNO 1  
PROCNO 1  
Date\_ 20110916  
Time\_ 8.10  
INSTRUM spect  
PROBHD 5 mm TXI 1H-  
PULPROG zg30  
TD 60094  
SOLVENT DMSO  
NS 32  
DS 0  
SWH 7507.507 Hz  
FIDRES 0.124929 Hz  
AQ 4.0023770 sec  
RG 14.3  
DW 66.600 usec  
DE 6.00 usec  
TE 300.0 K  
D1 1.00000000 sec  
TD0 1

==== CHANNEL f1 =  
NUC1 1H  
P1 9.00 usec  
PL1 3.00 dB  
PL1W 4.28034639 V  
SFO1 499.9534997 M  
SI 131072  
SF 499.9500005 MHz  
WDW no  
SSB 0  
LB 0.00 Hz  
GB 0  
PC 1.00

Dejmek\_MD337  
APT in DMSO  
16-9-11 DR  
\*\*\*\*\*

NAME Dejmek\_MD337  
EXPNO 2  
PROCNO 1  
Date\_ 20110916  
Time\_ 9.27  
INSTRUM spect  
PROBHD 5 mm TXI 1H-13  
PULPROG jmod  
TD 65536  
SOLVENT DMSO  
NS 1450  
DS 4  
SWH 30030.029 Hz  
FIDRES 0.458222 Hz  
AQ 1.0912410 sec  
RG 29193  
DW 16.650 usec  
DE 6.50 usec  
TE 300.0 K  
CNST2 165.0000000  
CNST11 1.0000000  
D1 2.00000000 sec  
D2 0.00606061 sec  
TD0 1

==== CHANNEL f1 =====  
NUC1 13C  
P1 14.50 usec  
P2 29.00 usec  
PL1 0.00 dB  
PL1W 67.82093048 W  
SFO1 125.7263554 MHz

==== CHANNEL f2 =====  
CPDPRG2 waltz16  
NUC2 1H  
PCPD2 60.00 usec  
PL2 3.00 dB  
PL12 19.48 dB  
PL2W 4.28034639 W  
PL12W 0.09626734 W  
SFO2 499.9519998 MHz  
SI 131072  
SF 125.7125653 MHz  
WDW EM  
SSB 0  
LB 1.00 Hz  
GB 0  
PC 1.00

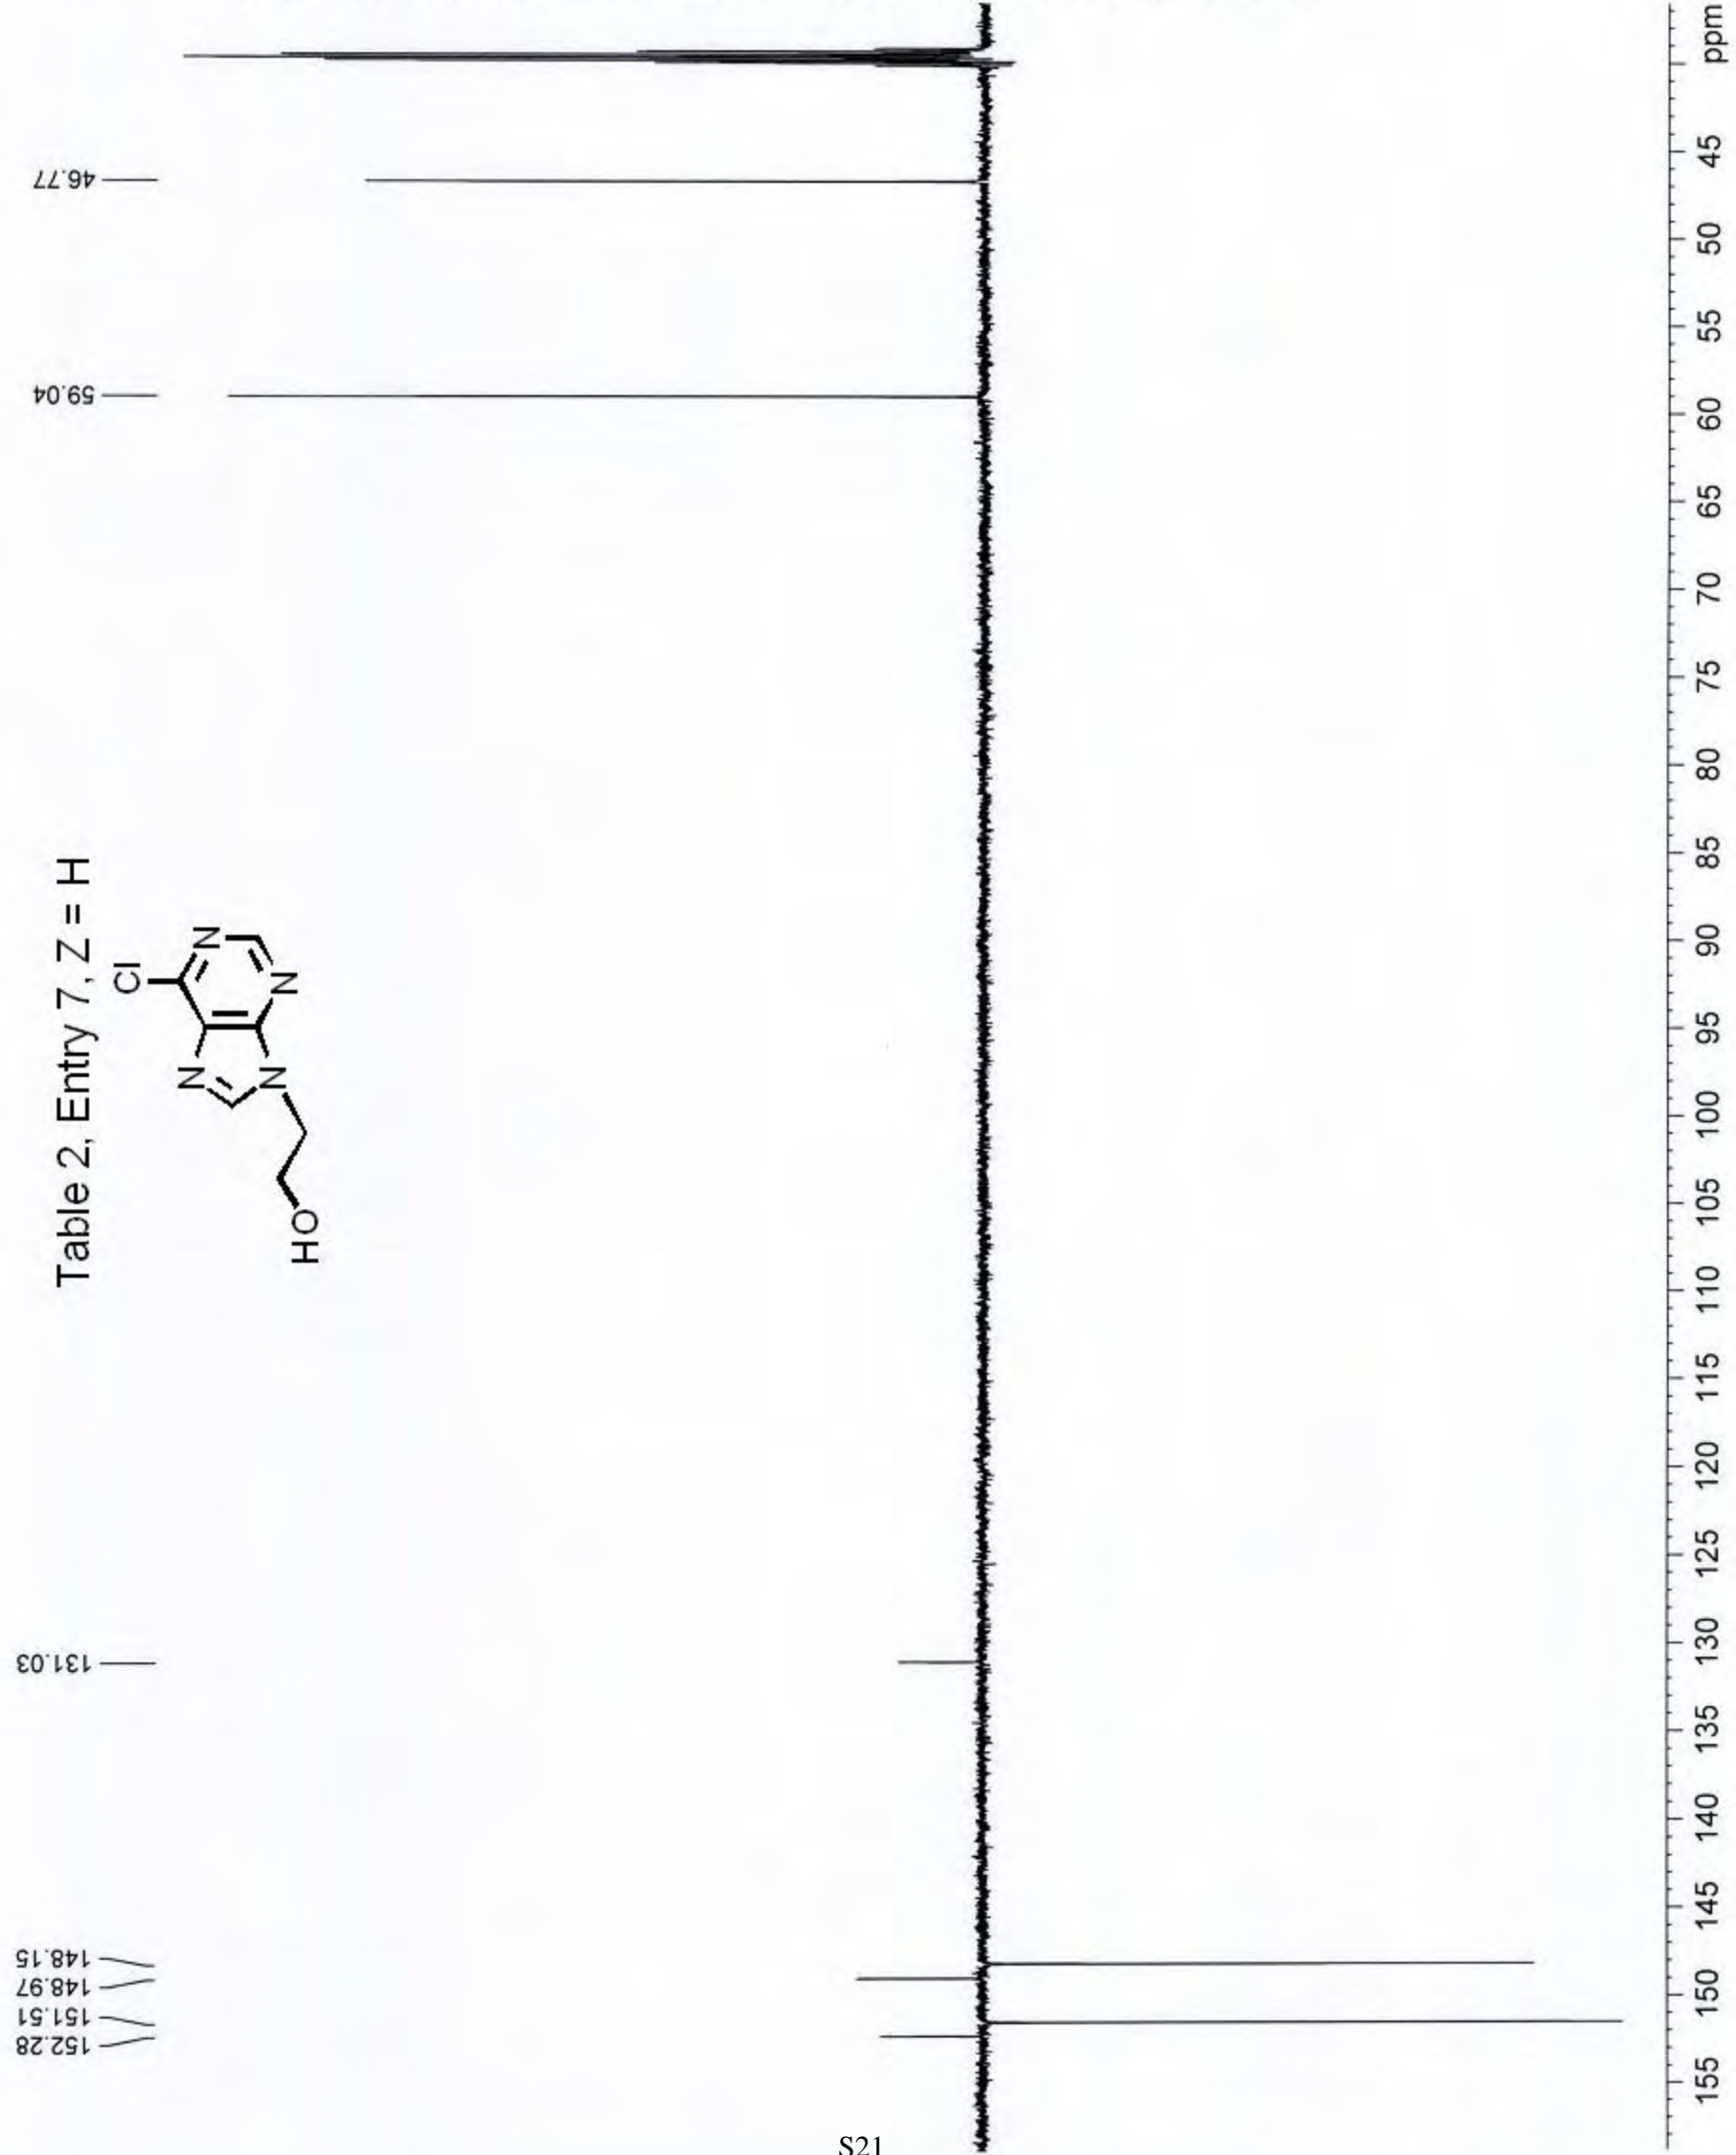

Dejmek\_MD335  
1H NMR in DMSO  
26-9-11 DR  
\*\*\*\*\*

NAME Dejmek\_MD335  
EXPNO 1  
PROCNO 1  
Date\_ 20110926  
Time\_ 15.13  
INSTRUM spect  
PROBHD 5 mm TXI 1H-  
PULPROG zg30  
TD 60094  
SOLVENT DMSO  
NS 32  
DS 0  
SWH 7507.507 Hz  
FIDRES 0.124929 Hz  
AQ 4.0023770 sec  
RG 14.3  
DW 66.600 usec  
DE 6.00 usec  
TE 300.0 K  
D1 1.00000000 sec  
TD0 1

=====  
CHANNEL f1 =  
NUC1 1H  
P1 9.00 usec  
PL1 3.00 dB  
PL1W 4.28034639 V  
SFO1 499.9534997 M  
SI 131072  
SF 499.9500007 MHz  
WDW no  
SSB 0  
LB 0.00 Hz  
GB 0  
PC 1.00

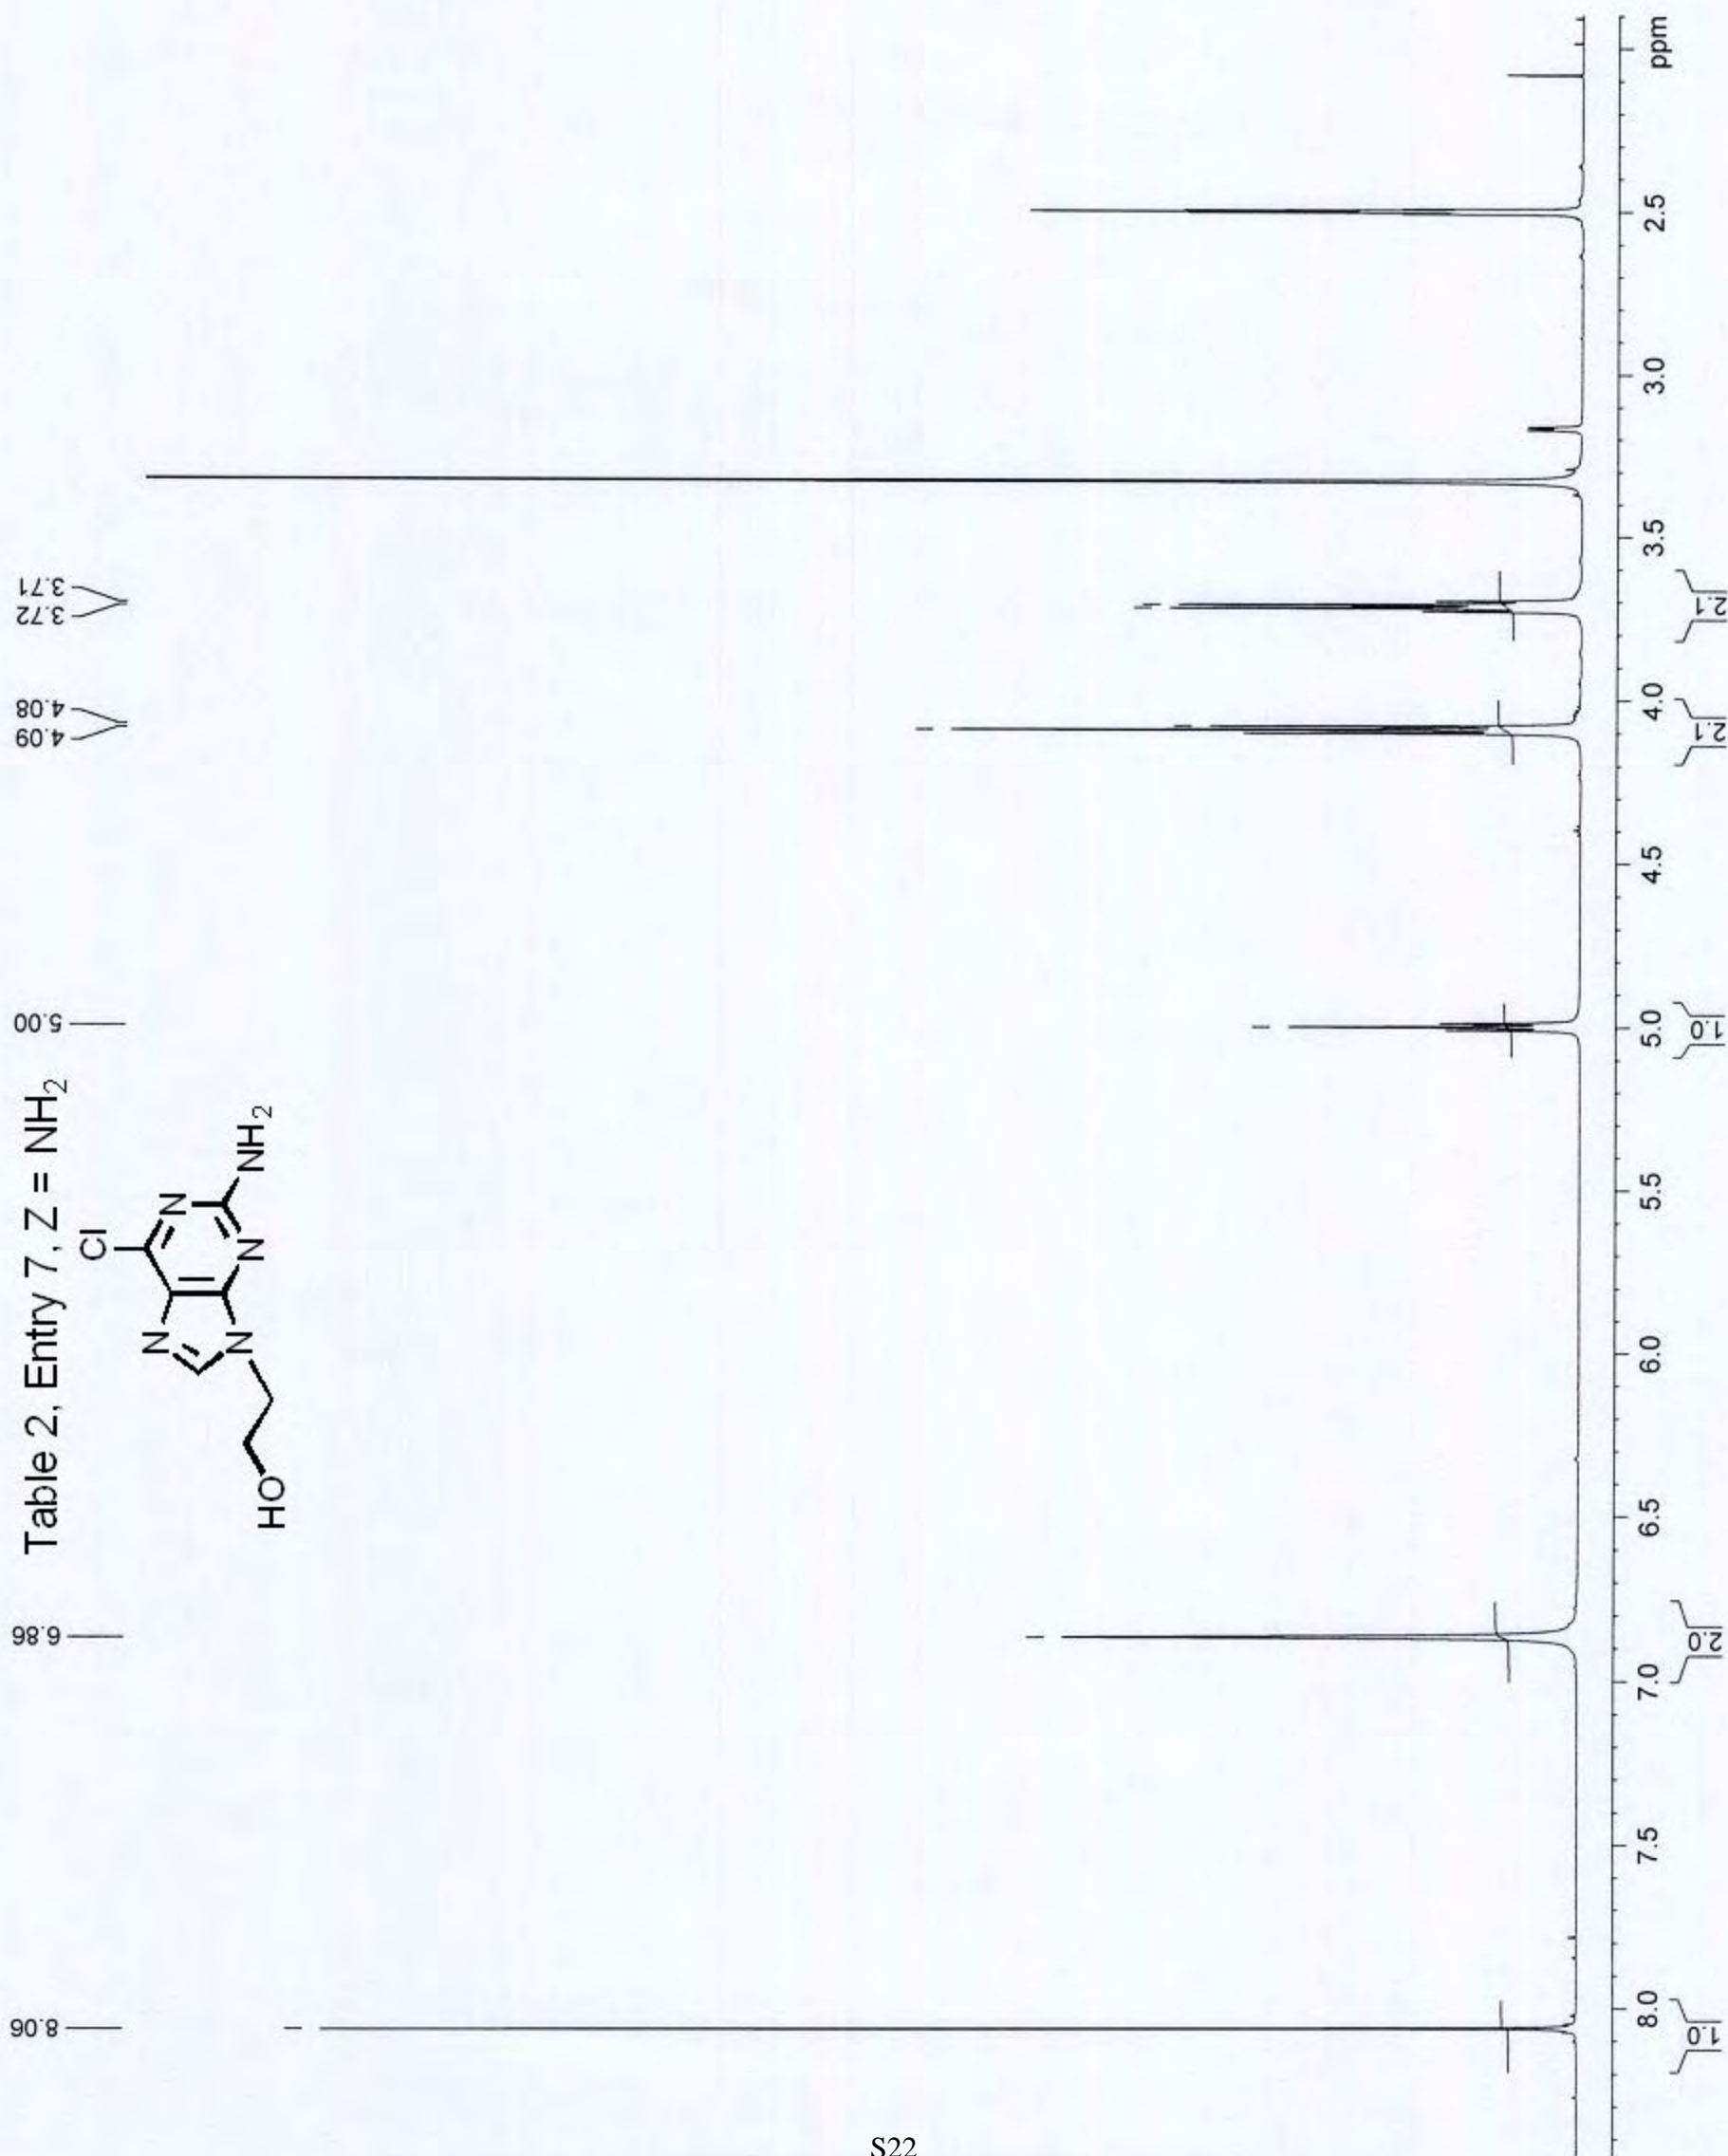

Table 2, Entry 7, Z = NH<sub>2</sub>

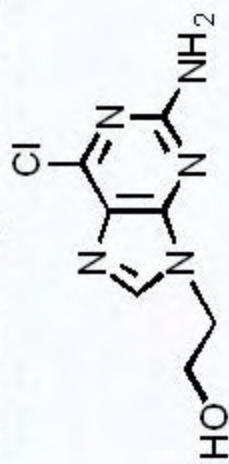

Dejimek\_MD335  
APT in DMSO  
26-9-11 DR  
\*\*\*\*\*

NAME Dejimek\_MD335  
EXPNO 2  
PROCNO 1  
Date\_ 20110926  
Time\_ 15.27  
INSTRUM spect  
PROBHD 5 mm TXI 1H-13  
PULPROG jmod  
TD 65536  
SOLVENT DMSO  
NS 267  
DS 4  
SWH 30030.029 Hz  
FIDRES 0.458222 Hz  
AQ 1.0912410 sec  
RG 29193  
DW 16.650 usec  
DE 6.50 usec  
TE 300.0 K  
CNST2 165.0000000  
CNST11 1.0000000  
D1 2.00000000 sec  
D20 0.00606061 sec  
TD0 1

==== CHANNEL f1 =====  
NUC1 13C  
P1 14.50 usec  
P2 29.00 usec  
PL1 0.00 dB  
PL1W 67.82093048 W  
SFO1 125.7263554 MHz

==== CHANNEL f2 =====  
CPDPRG2 waltz16  
NUC2 1H  
PCPD2 60.00 usec  
PL2 3.00 dB  
PL12 19.48 dB  
PL2W 4.28034639 W  
PL12W 0.09626734 W  
SFO2 499.9519998 MHz  
SI 131072  
SF 125.7125638 MHz  
WDW EM  
SSB 0  
LB 1.00 Hz  
GB 0  
PC 1.00

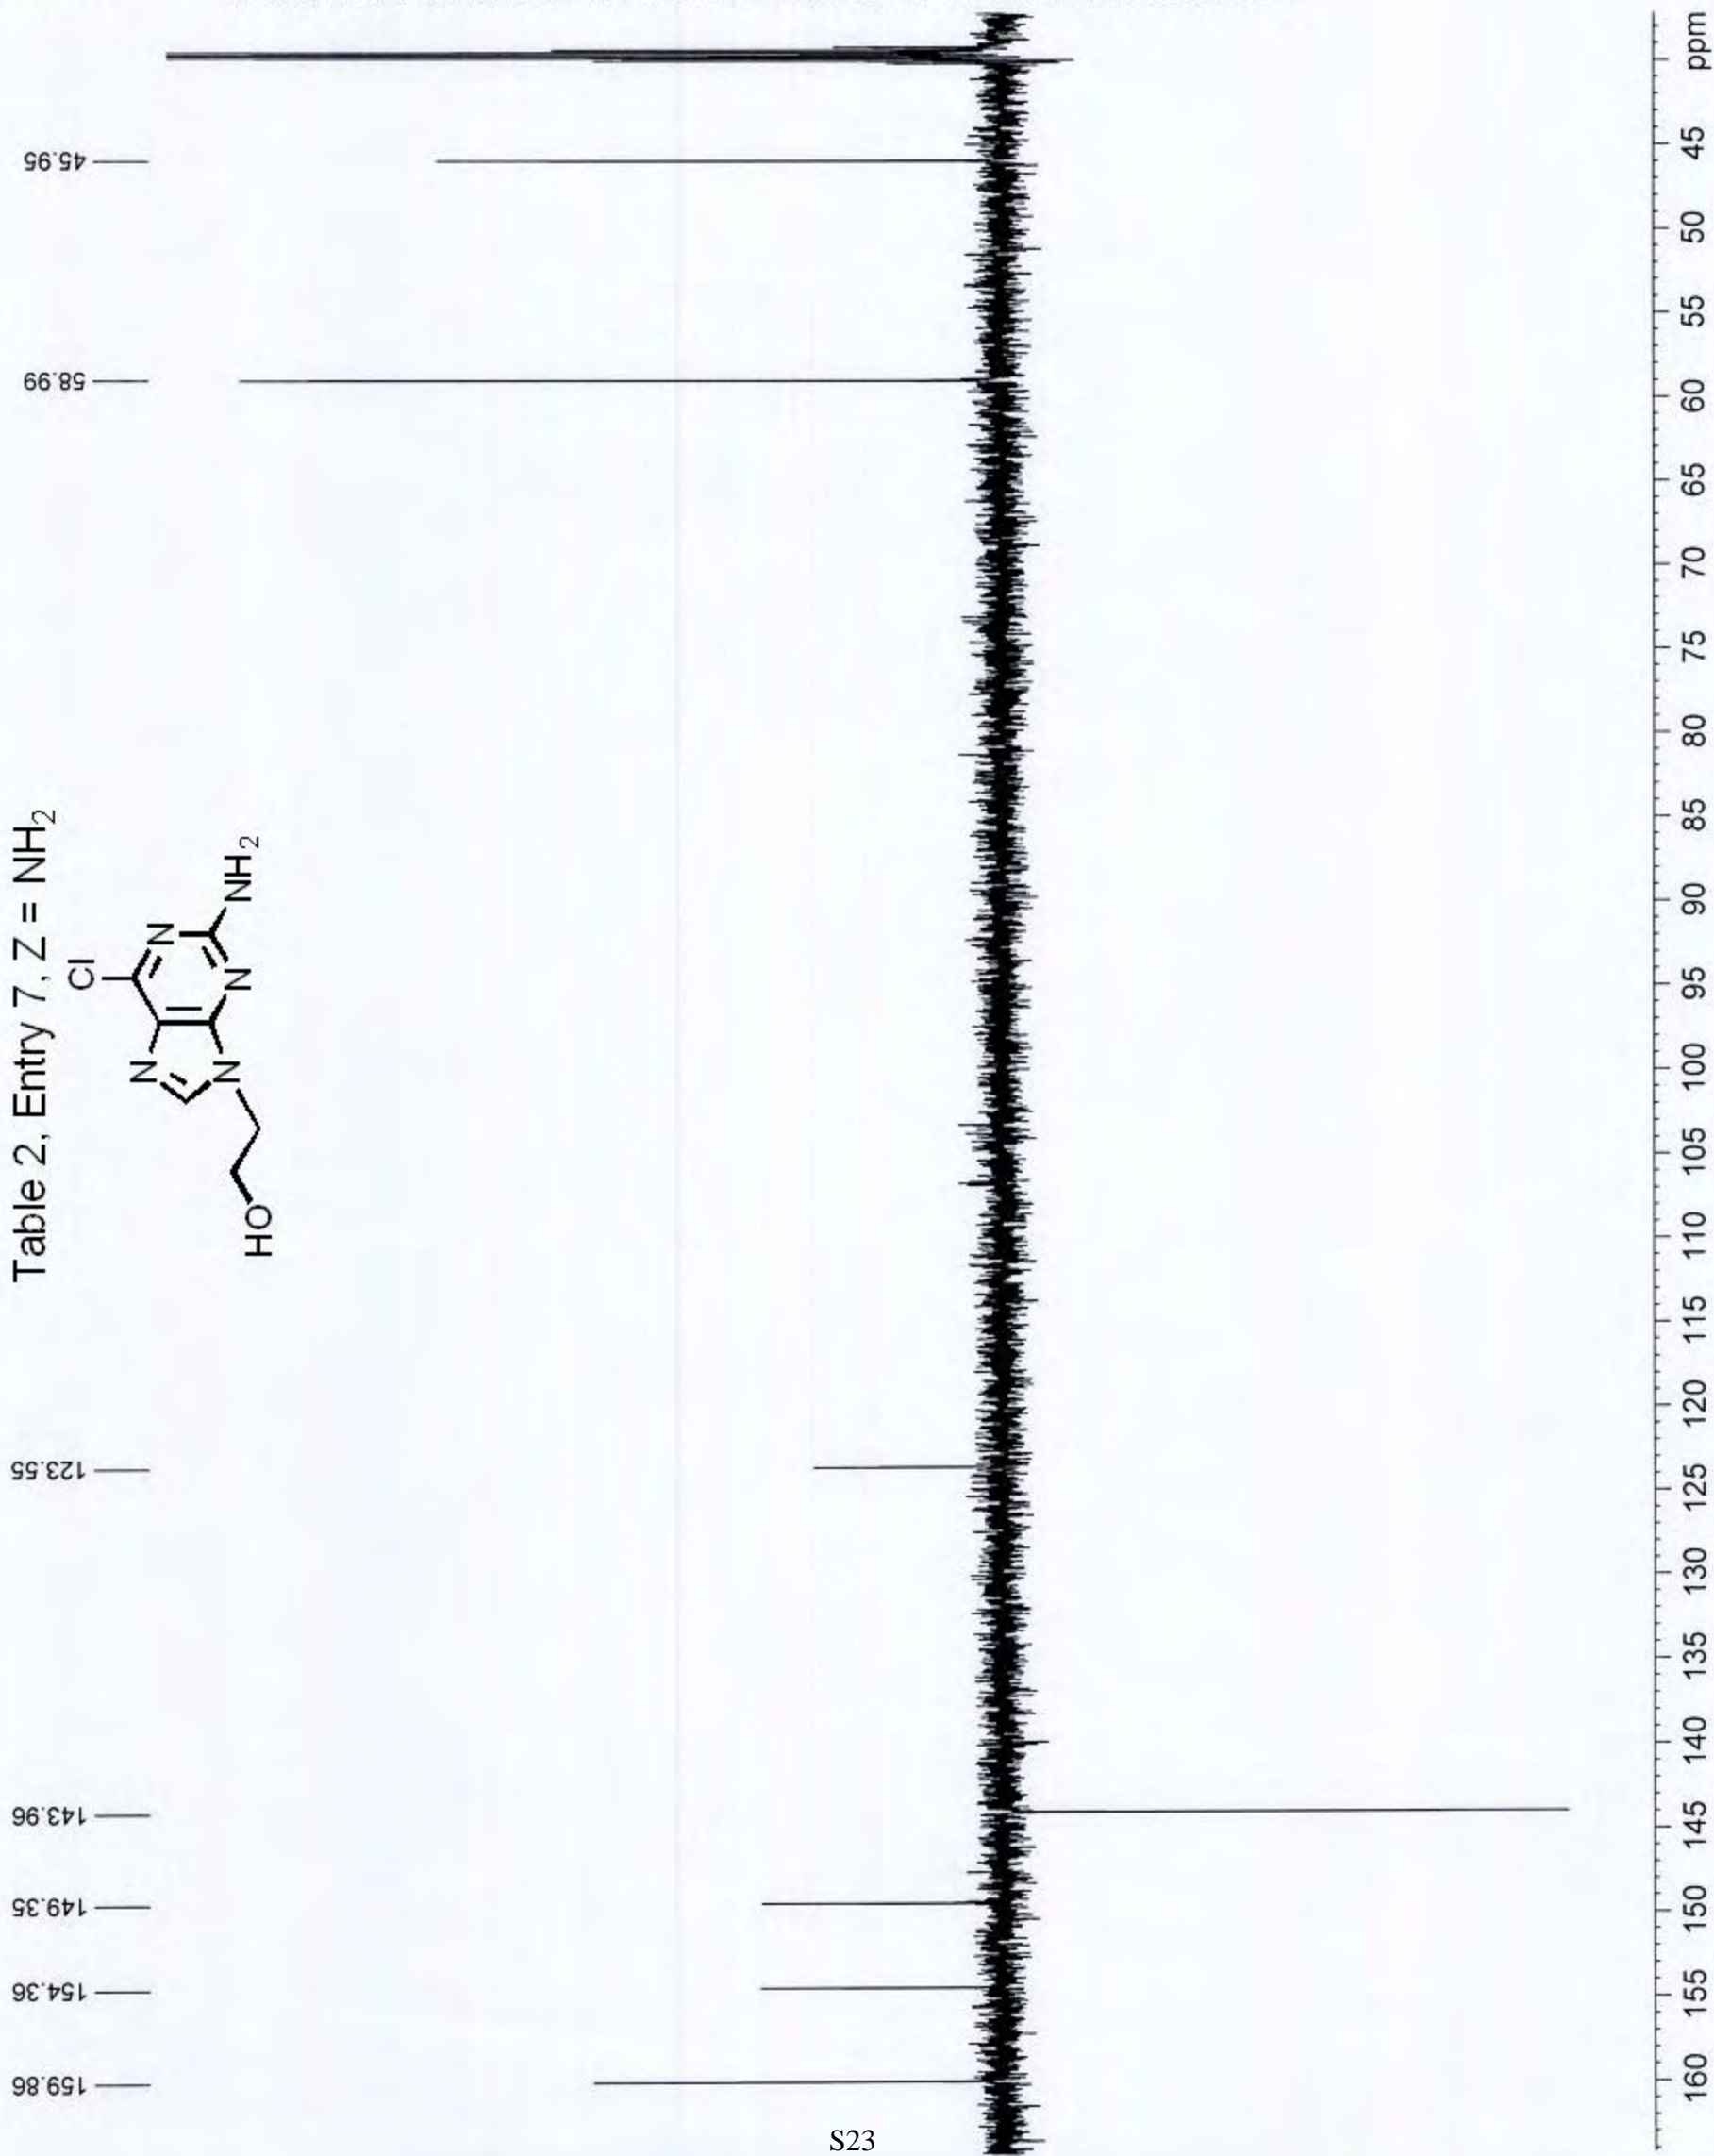

Table 2, Entry 8, Z = H

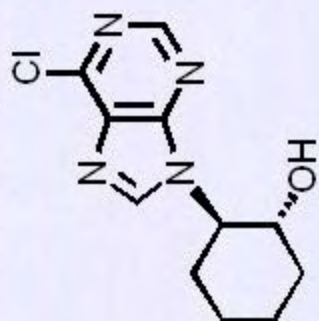

Dejmek\_MD331  
1H NMR in DMSO  
7-12-11 DR  
\*\*\*\*\*

NAME Dejmek\_MD331  
EXPNO 1  
PROCNO 1  
Date\_ 20111207  
Time\_ 15.34  
INSTRUM spect  
PROBHD 5 mm TXI 1H-13  
PULPROG zg30  
TD 60094  
SOLVENT DMSO  
NS 32  
DS 0  
SWH 7507.507 Hz  
FIDRES 0.124929 Hz  
AQ 4.0023770 sec  
RG 14.3  
DW 66.600 usec  
DE 6.00 usec  
TE 300.0 K  
D1 1.00000000 sec  
TD0 1

==== CHANNEL f1 =====  
NUC1 1H  
P1 8.00 usec  
PL1 0.00 dB  
PL1W 8.54041386 W  
SFO1 499.9534997 MHz  
SI 131072  
SF 499.9499978 MHz  
WDW no  
SSB 0  
LB 0.00 Hz  
GB 0  
PC 1.00

8.75  
8.74

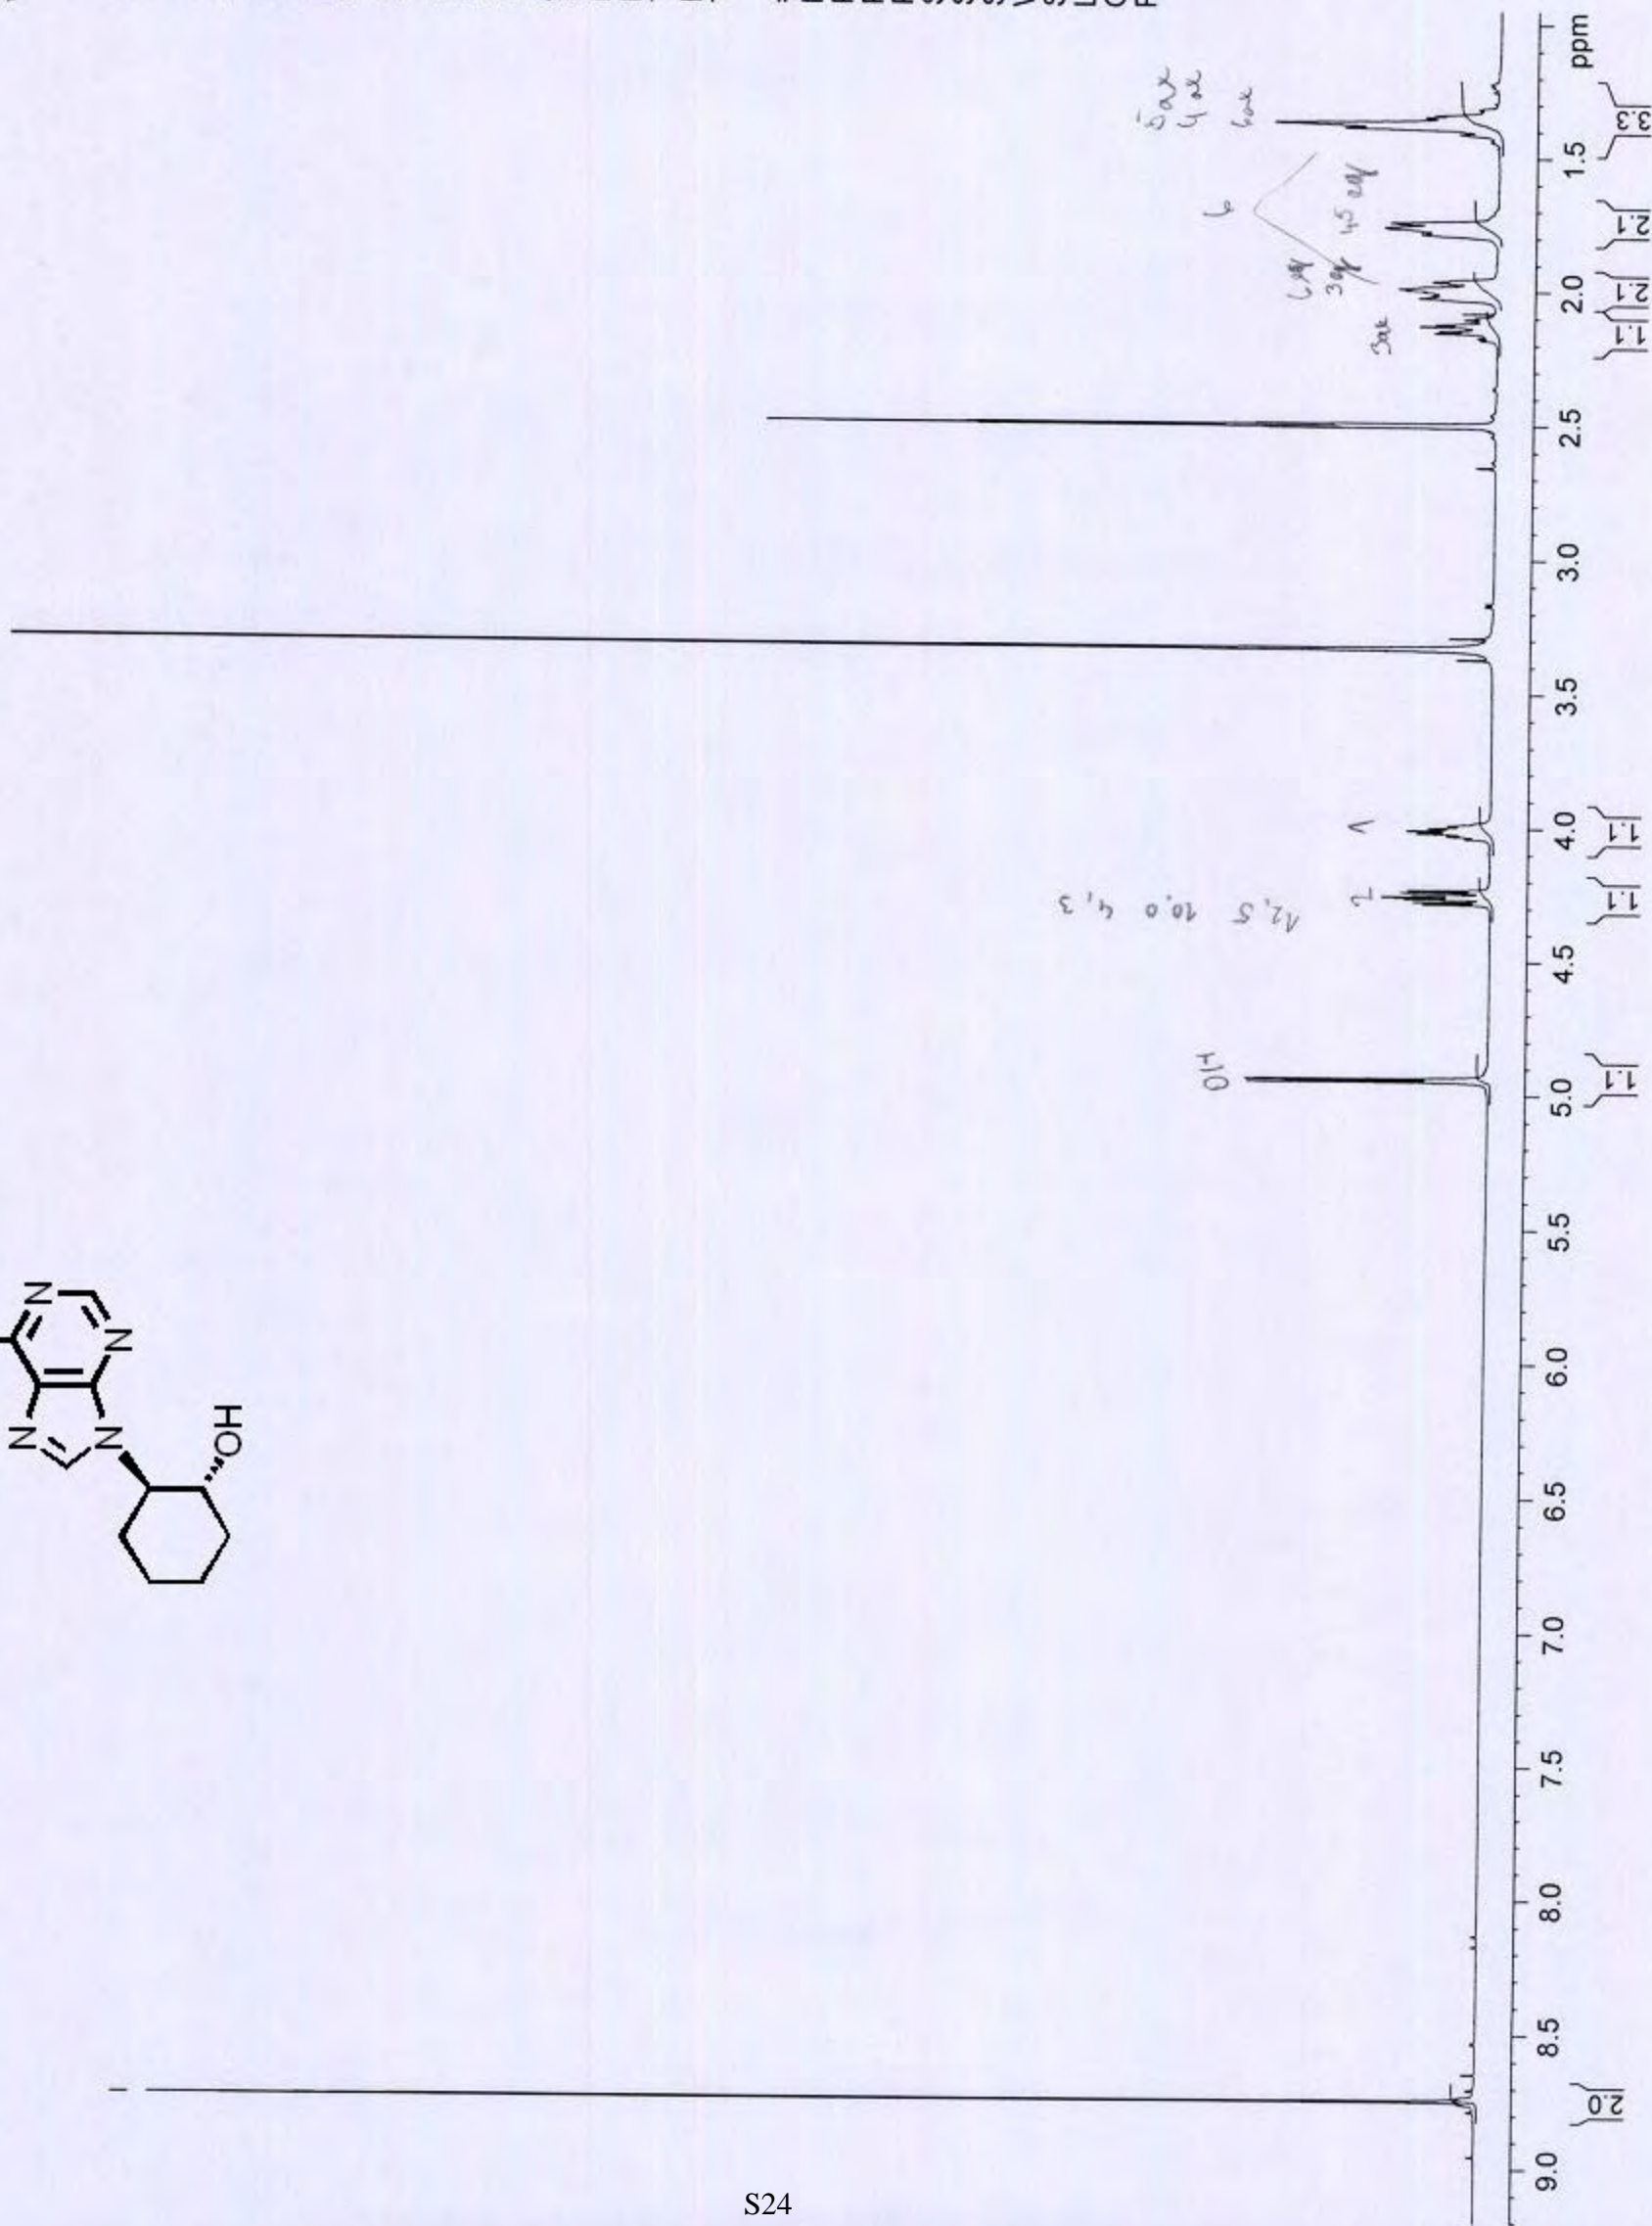



Table 2, Entry 8, Z = H

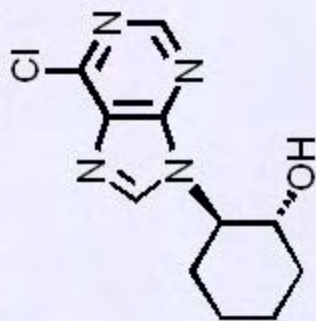

Dejmek\_MD331  
APT in DMSO  
7-12-11 DR  
\*\*\*\*\*

NAME Dejmek\_MD331  
EXPNO 2  
PROCNO 1  
Date\_ 20111207  
Time\_ 16.32  
INSTRUM spect  
PROBHD 5 mm TXI 1H-13  
PULPROG jmod  
TD 65536  
SOLVENT DMSO  
NS 1089  
DS 4  
SWH 30030.029 Hz  
FIDRES 0.458222 Hz  
AQ 1.0912410 sec  
RG 29193  
DW 16.650 usec  
DE 6.50 usec  
TE 300.0 K  
CNST2 165.0000000  
CNST11 1.0000000  
D1 2.00000000 sec  
D20 0.00606061 sec  
TD0 1

==== CHANNEL f1 =====  
NUC1 13C  
P1 14.75 usec  
P2 29.50 usec  
PL1 0.00 dB  
PL1W 67.82093048 W  
SFO1 125.7263554 MHz

==== CHANNEL f2 =====  
CPDPRG2 waltz16  
NUC2 1H  
PCPD2 60.00 usec  
PL2 0.00 dB  
PL12 17.50 dB  
PL2W 8.54041386 W  
PL12W 0.15187243 W  
SFO2 499.9519998 MHz  
SI 131072  
SF 125.7125631 MHz  
WDW EM  
SSB 0  
LB 1.00 Hz  
GB 0  
PC 1.00

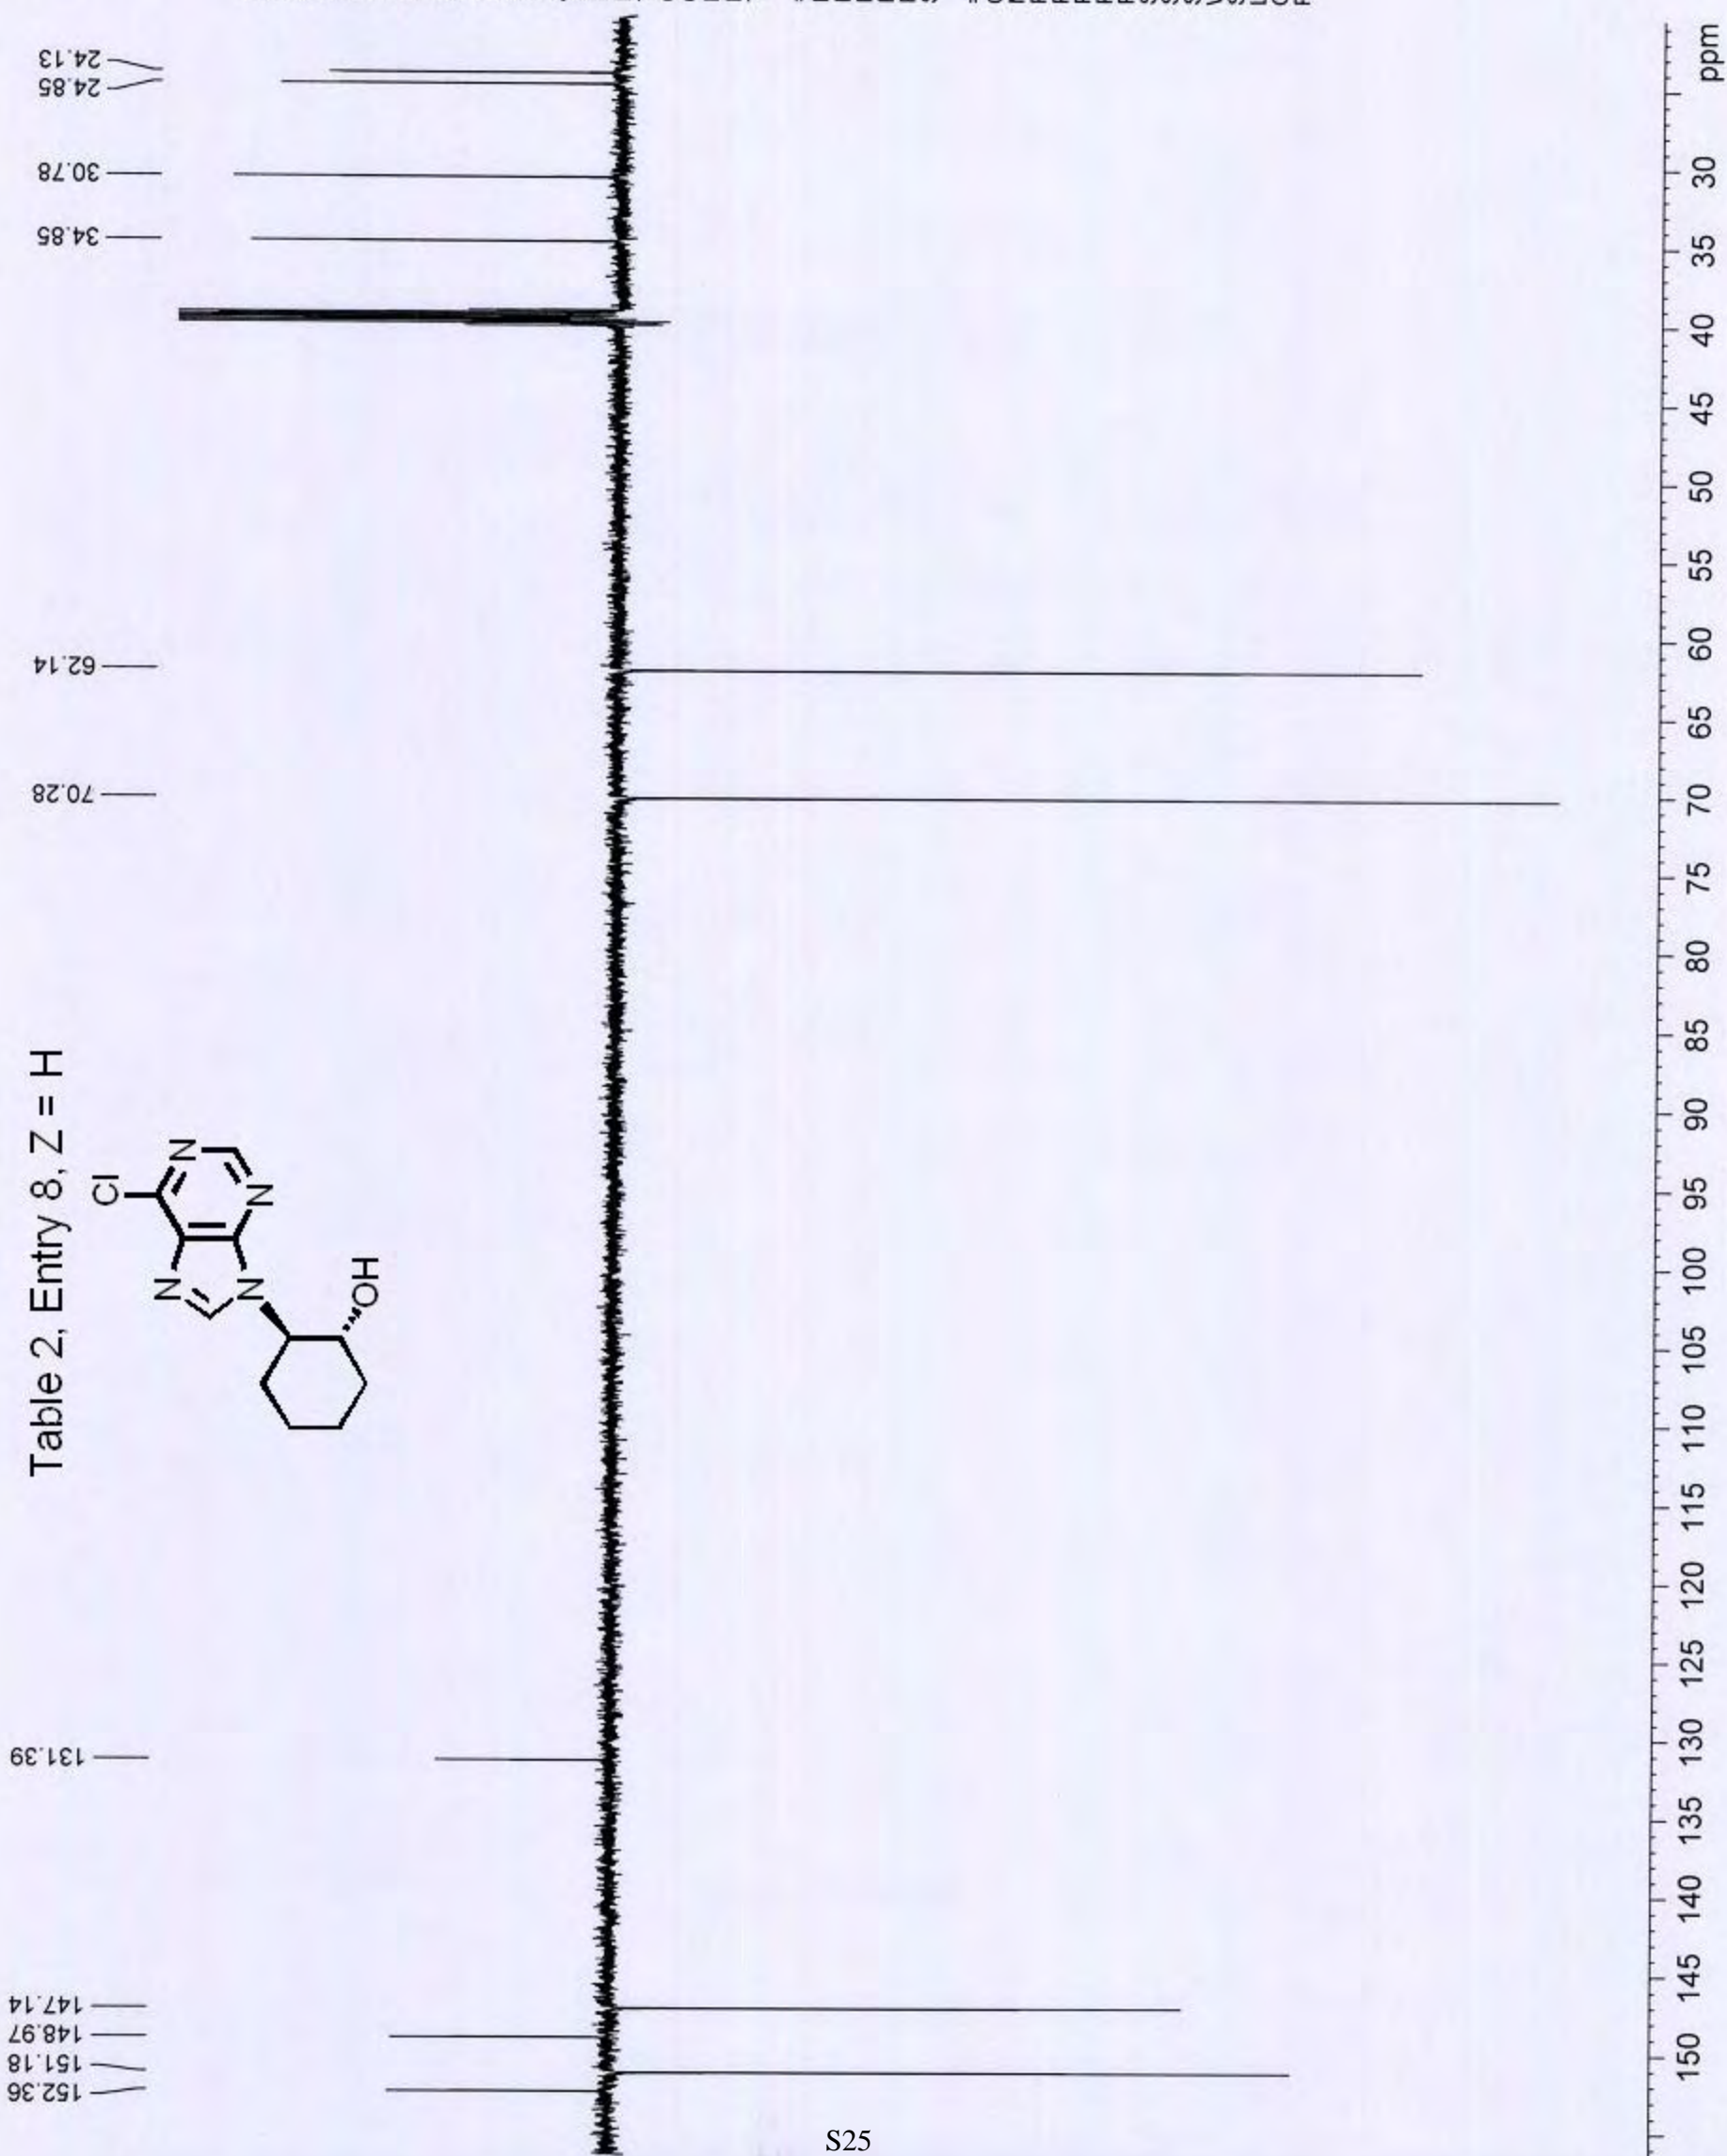

Table 2, Entry 9, Z = H

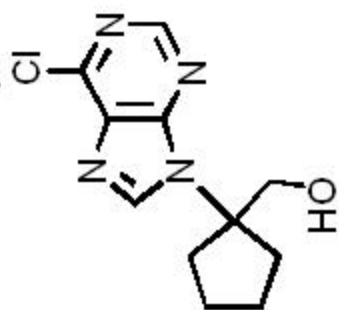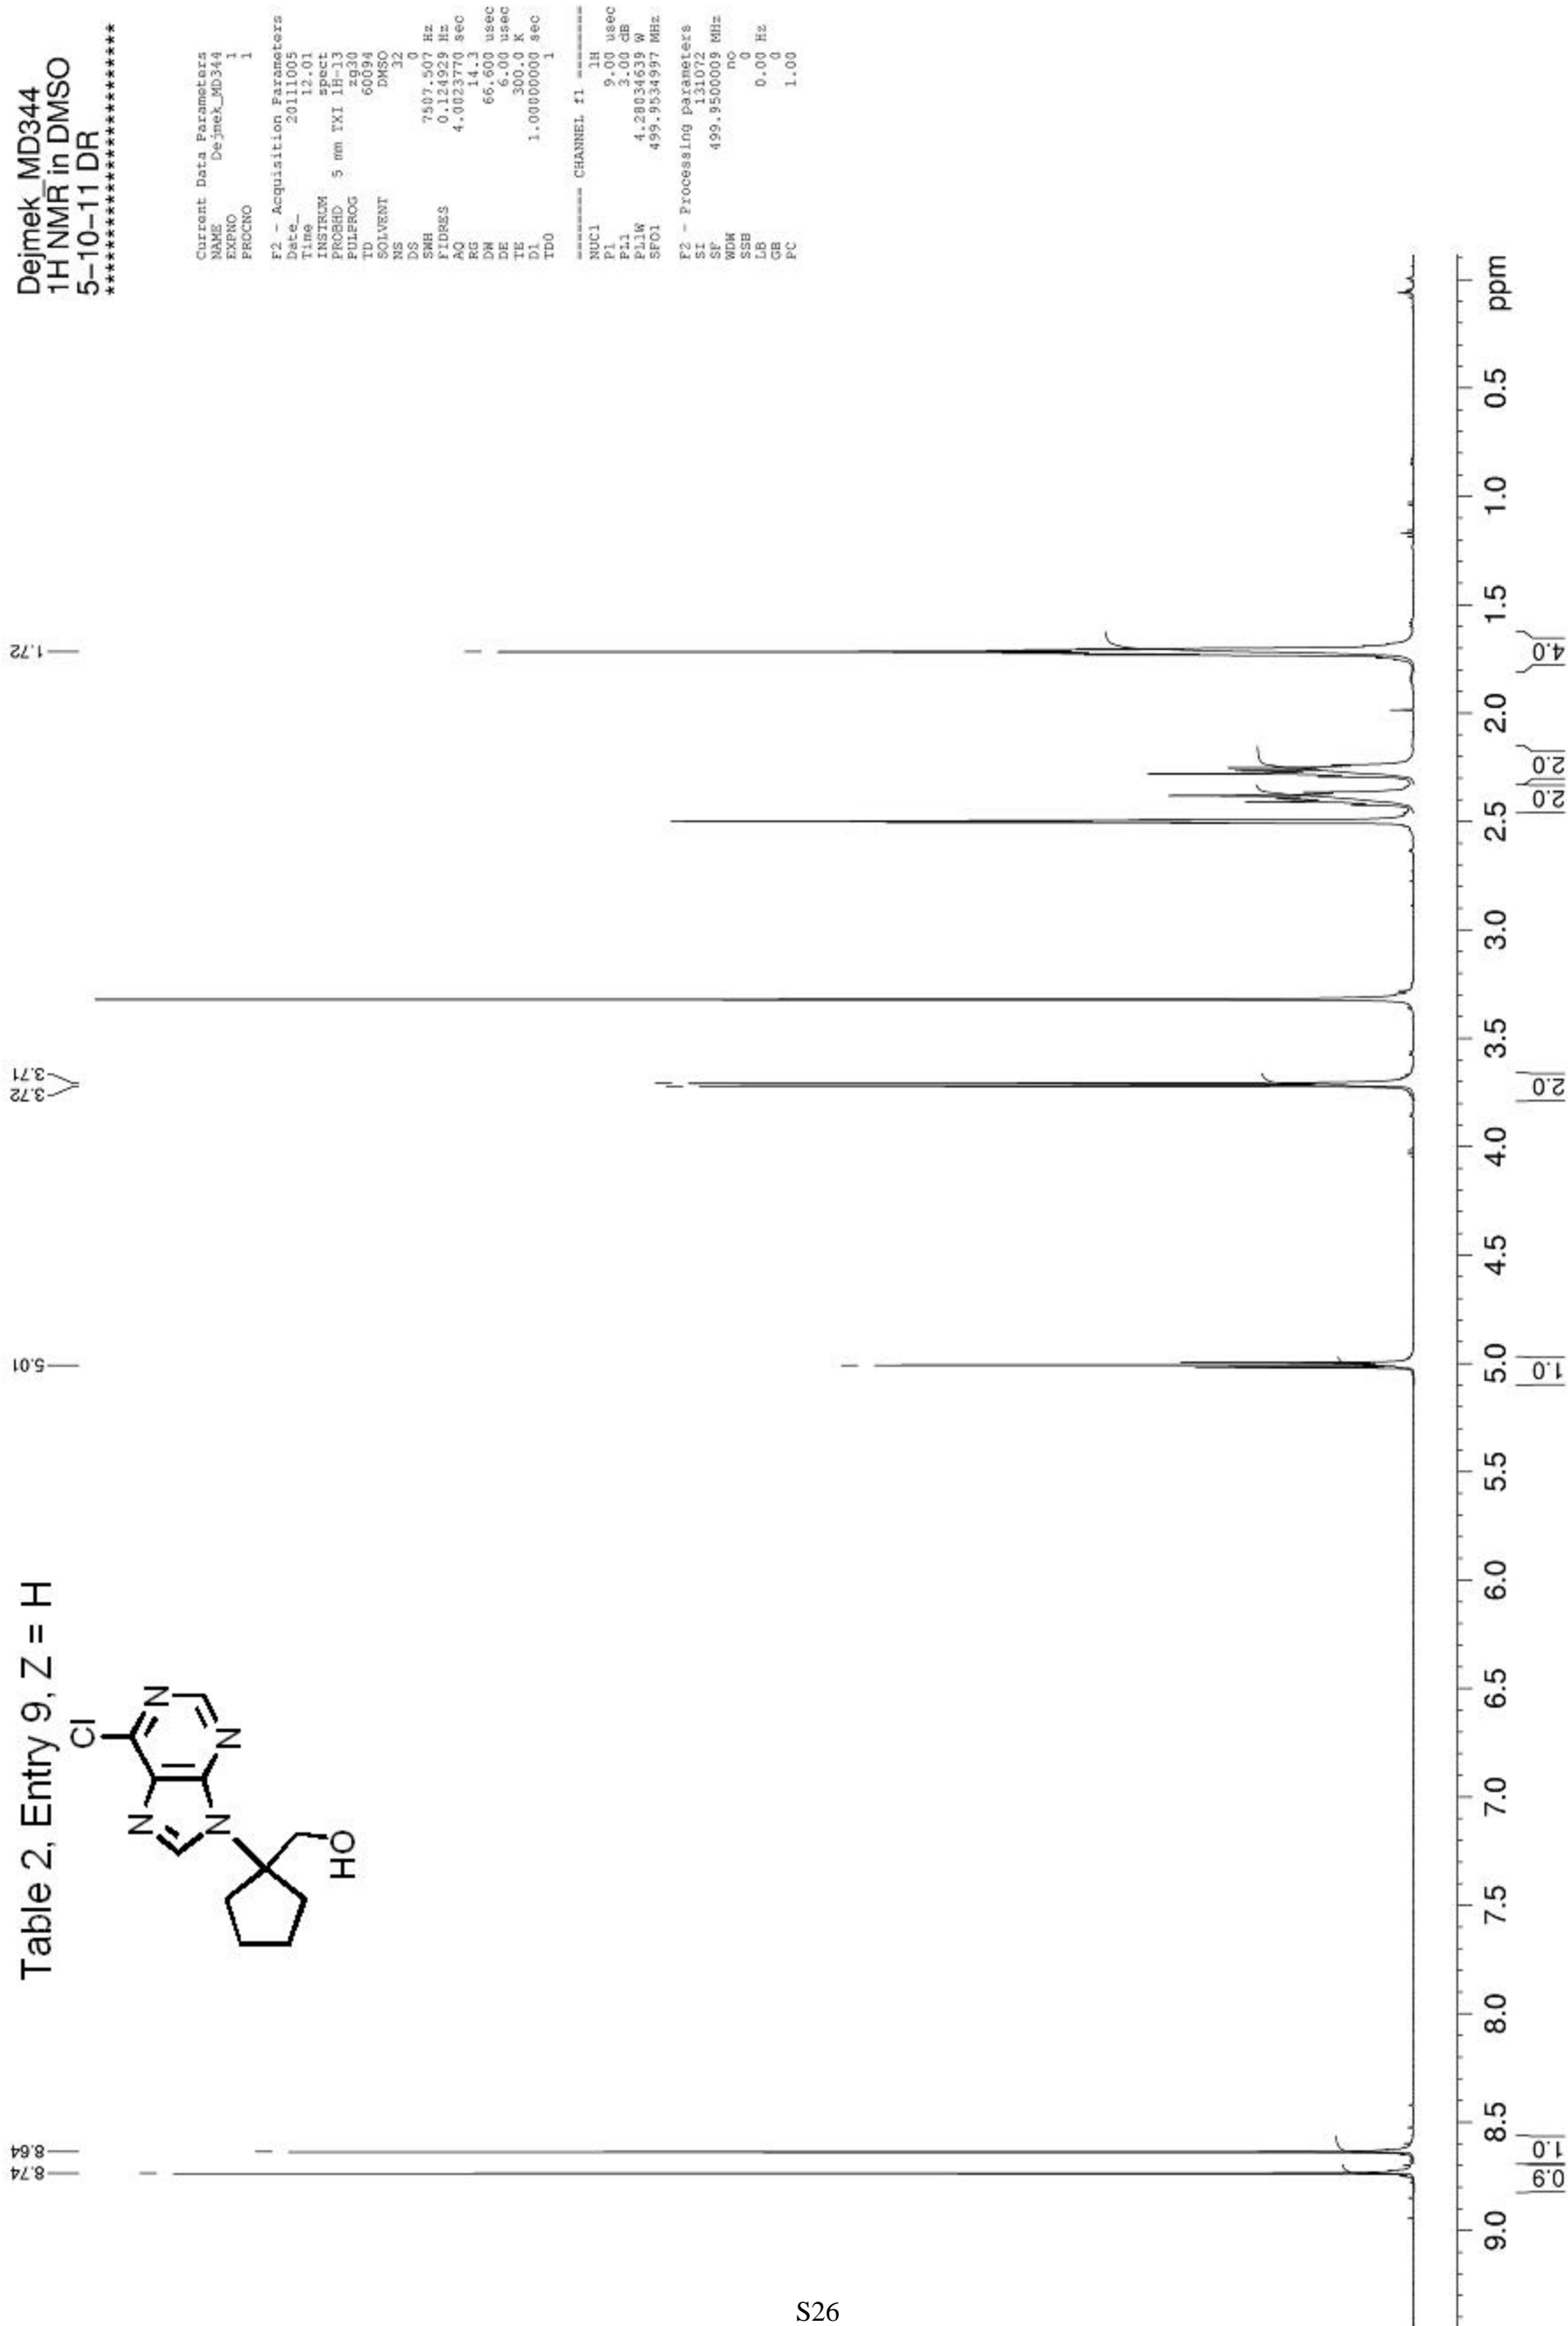

Table 2, Entry 9, Z = H

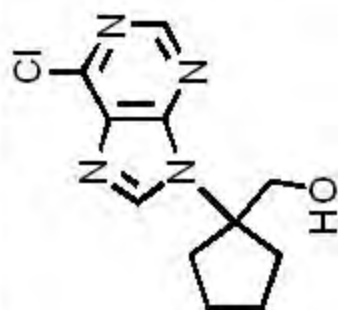

Dejmek\_MD344  
APT in DMSO  
5-10-11 DR  
\*\*\*\*\*

```
NAME      Dejmek_MD344
EXPNO     2
PROCNO    1
Date_     20111005
Time      12.15
INSTRUM   spect
PROBHD    5 mm TXI 1H-13
PULPROG   jmod
TD         65536
SOLVENT   DMSO
NS         252
DS         4
SWH        30030.029 Hz
FIDRES     0.458222 Hz
AQ         1.0912410 sec
RG         29193
DW         16.650 usec
DE         6.50 usec
TE         300.0 K
CNST2     165.0000000
CNST11    1.0000000
D1         2.00000000 sec
D20       0.00606061 sec
TD0       1

===== CHANNEL f1 =====
NUC1      13C
P1        14.50 usec
P2        29.00 usec
PL1       0.00 dB
PL1W     67.82093048 W
SFO1     125.7263554 MHz

===== CHANNEL f2 =====
CPDPRG2   waltz16
NUC2      1H
PCPD2     60.00 usec
PL2       3.00 dB
PL12     19.48 dB
PL2W     4.28034639 W
PL12W    0.09626734 W
SFO2     499.9519998 MHz
SI        131072
SF        125.7125654 MHz

WDW       EM
SSB       0
LB        1.00 Hz
GB        0
PC        1.00
```

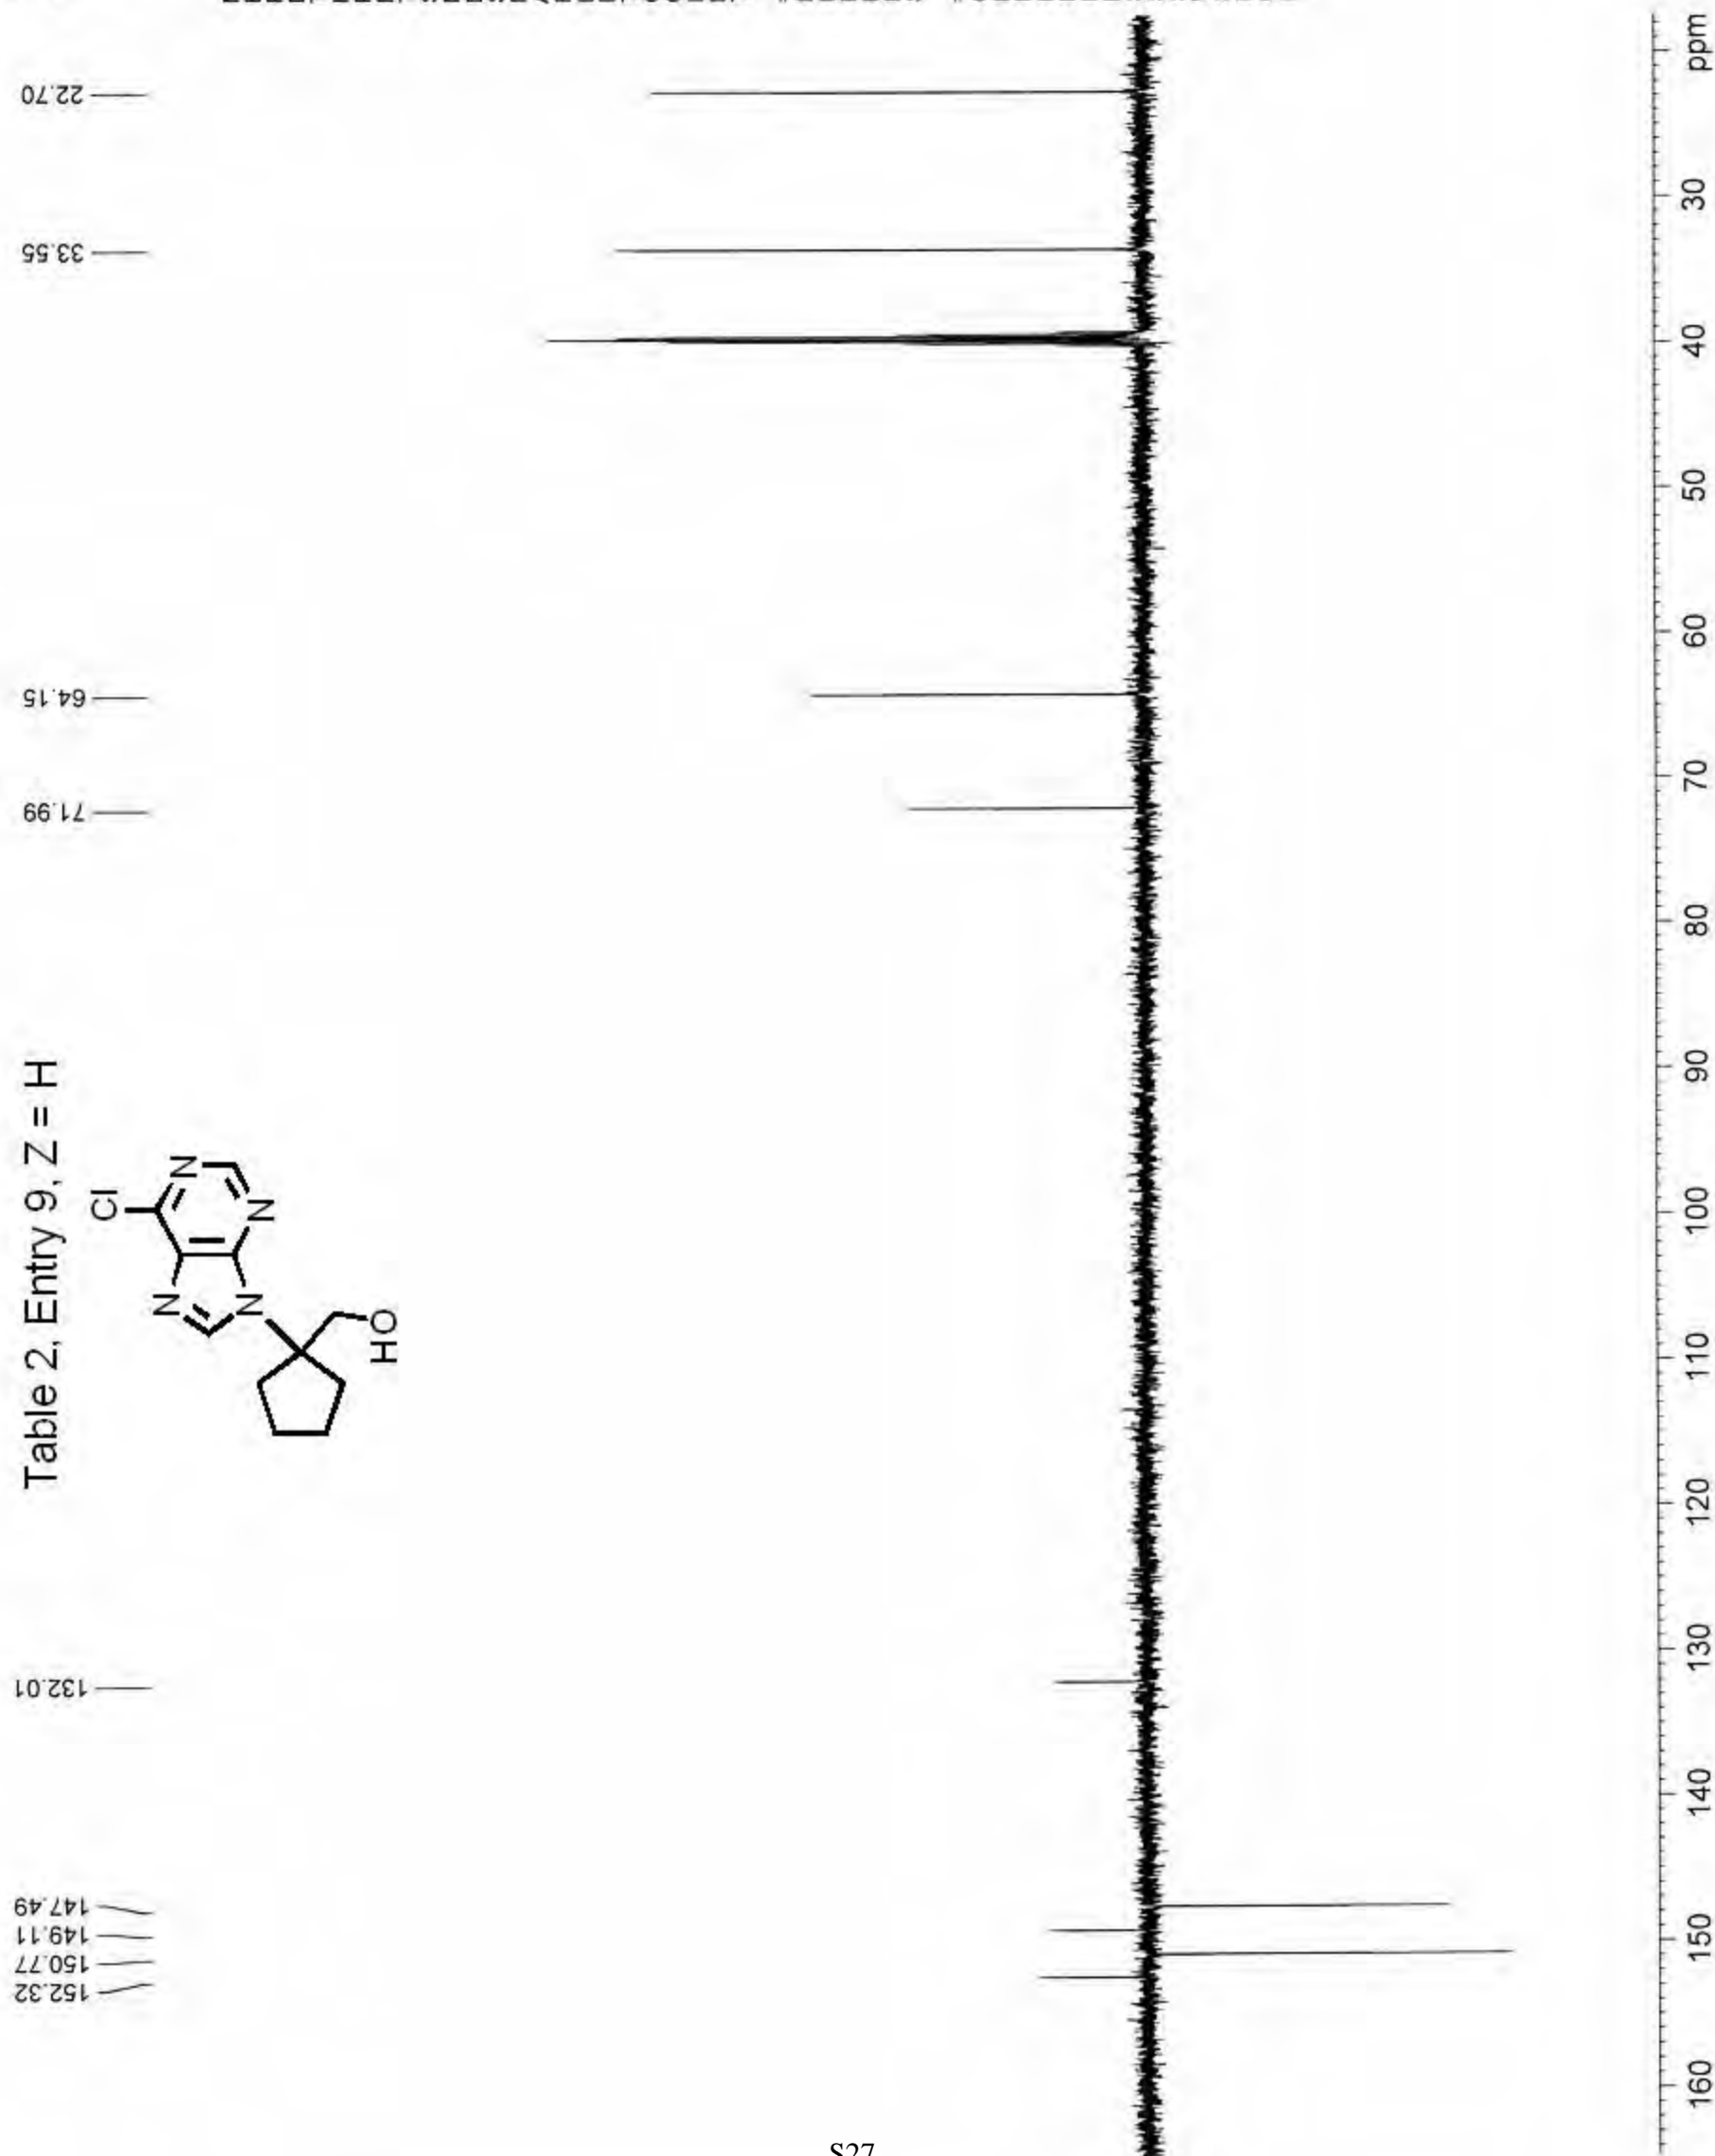

Dejmek\_MD343  
1H NMR in DMSO  
5-10-11 DR  
\*\*\*\*\*

NAME Dejmek\_MD34  
EXPNO 1  
PROCNO 1  
Date\_ 20111005  
Time\_ 12.37  
INSTRUM spect  
PROBHD 5 mm TXI 1H-  
PULPROG zg30  
TD 60094  
SOLVENT DMSO  
NS 32  
DS 0  
SWH 7507.507 Hz  
FIDRES 0.124929 Hz  
AQ 4.0023770 sec  
RG 14.3  
DW 66.600 usec  
DE 6.00 usec  
TE 300.0 K  
D1 1.00000000 sec  
TD0 1

==== CHANNEL f1 =  
NUC1 1H  
P1 9.00 usec  
PL1 3.00 dB  
PL1W 4.28034639 V  
SFO1 499.9534997 M  
SI 131072  
SF 499.9500007 MHz  
WDW no  
SSB 0  
LB 0.00 Hz  
GB 0  
PC 1.00

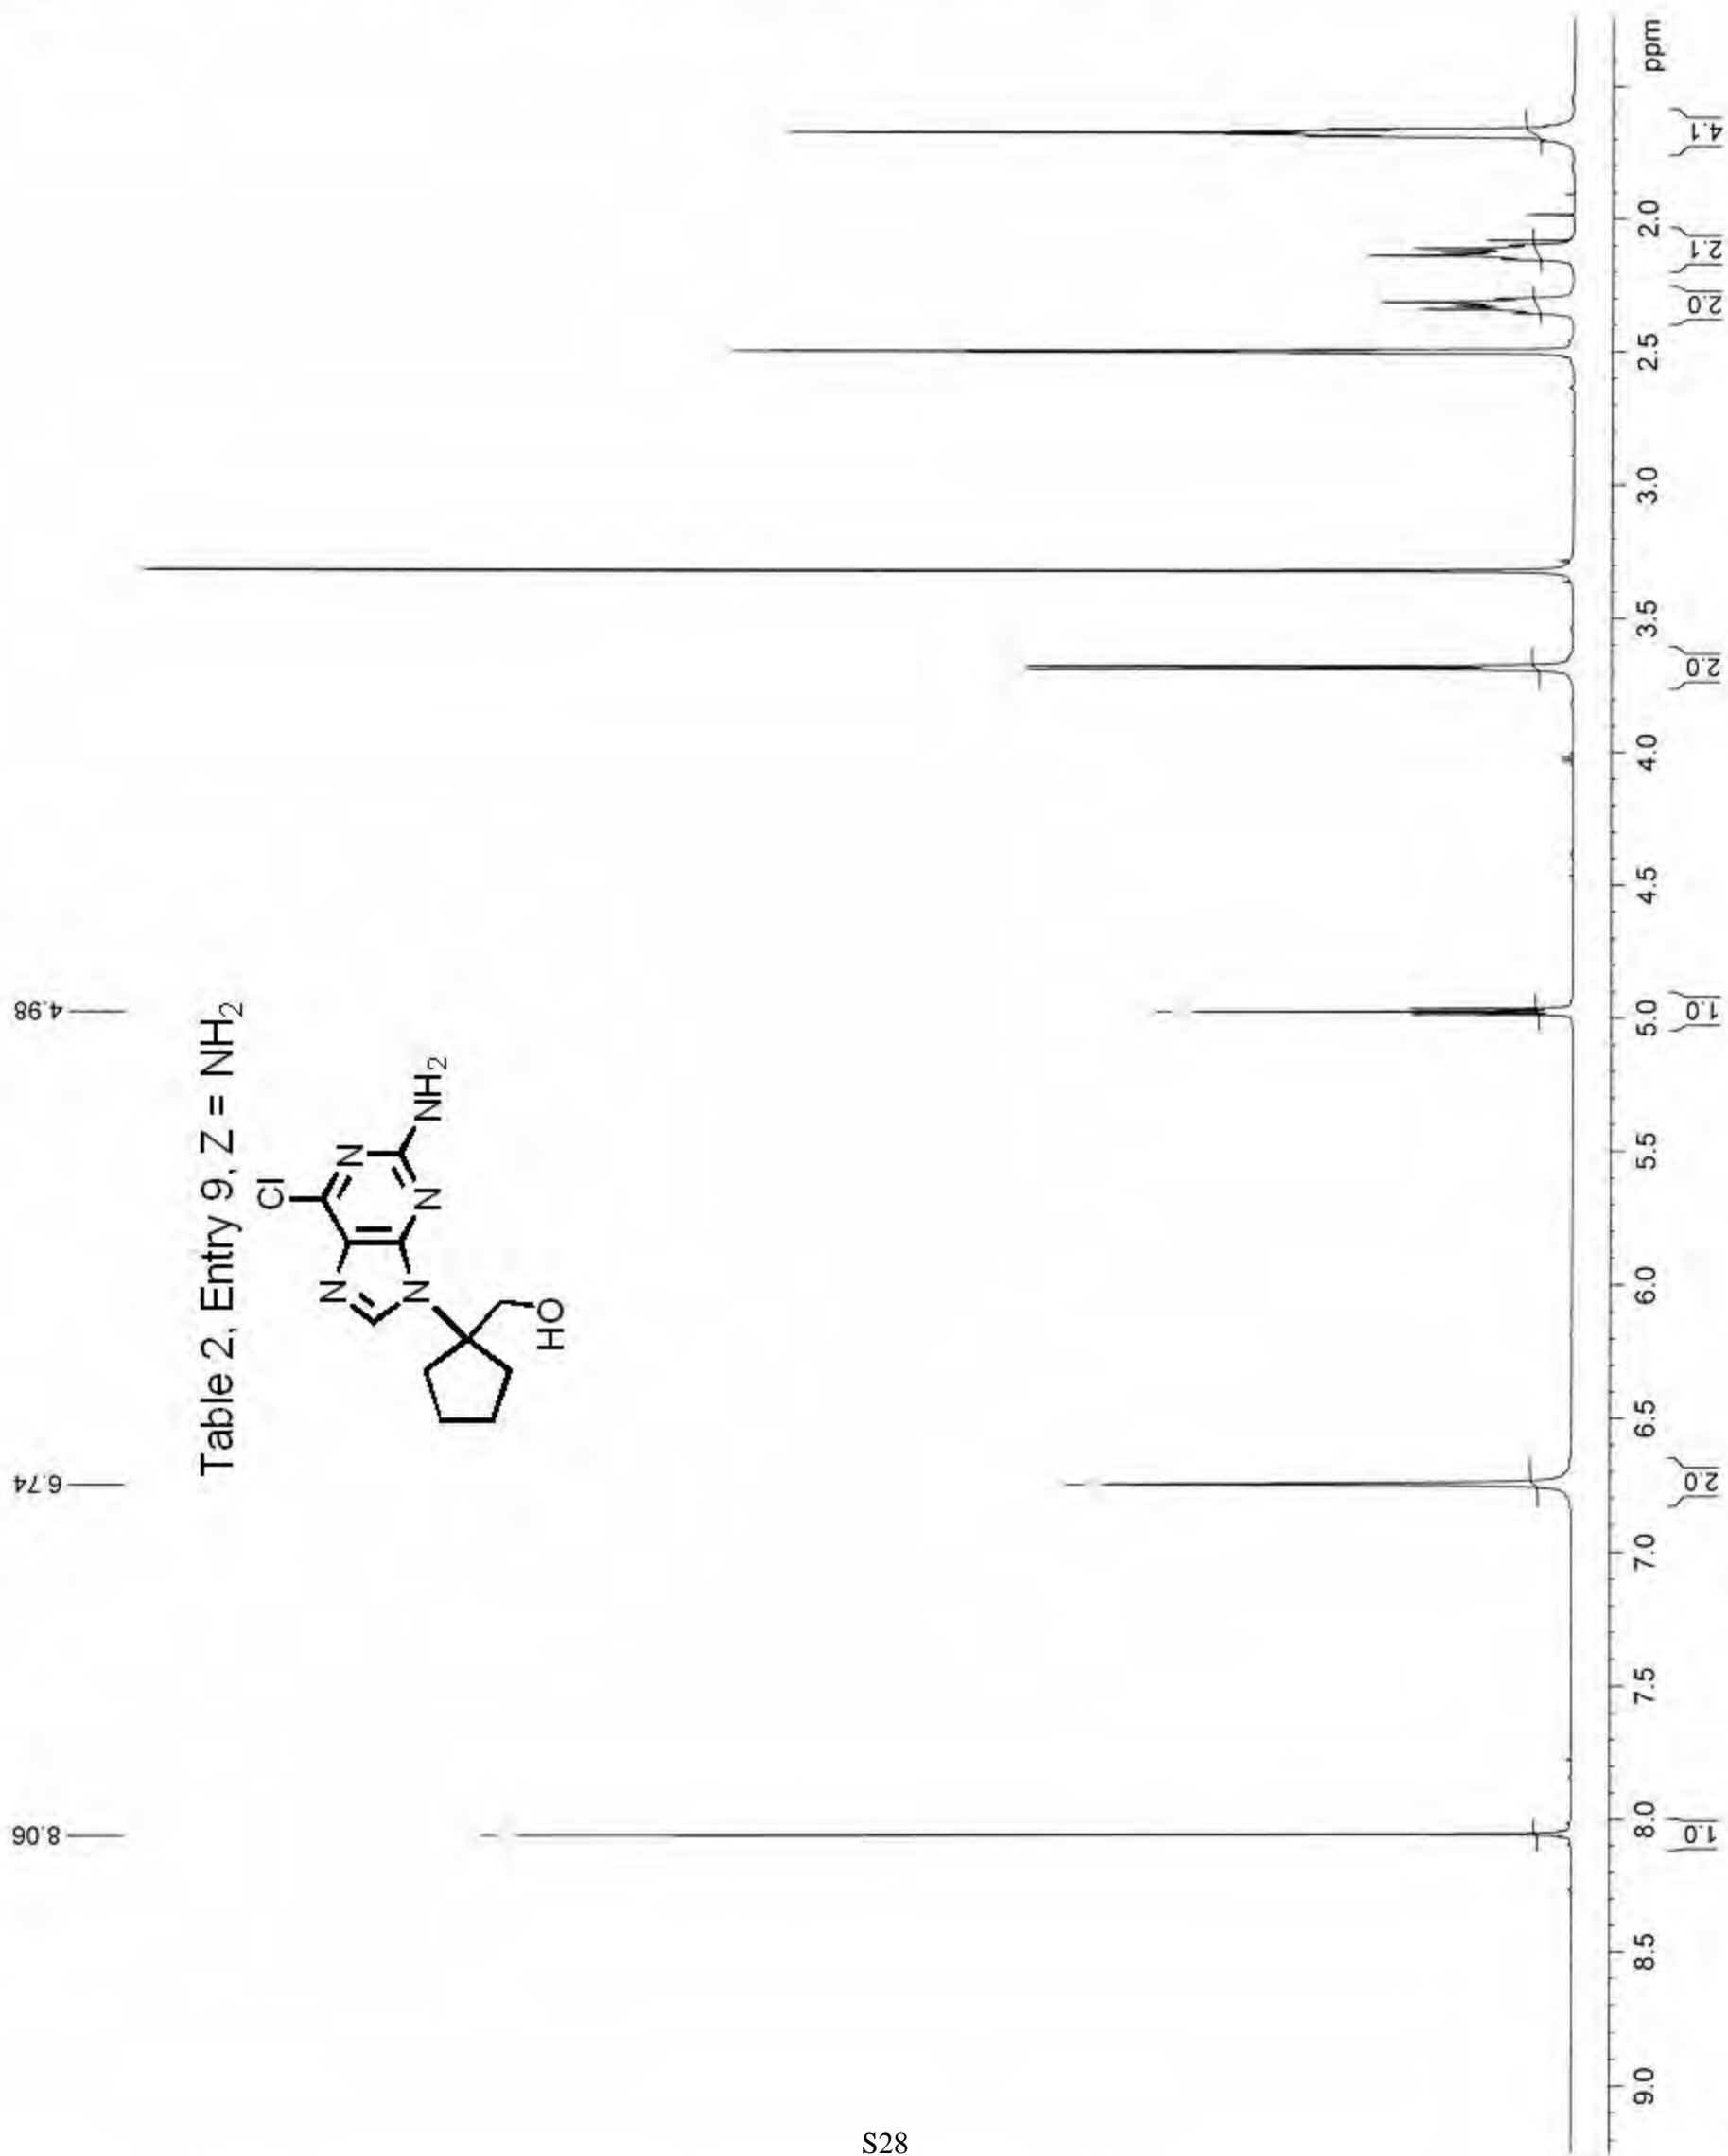

Table 2, Entry 9, Z = NH<sub>2</sub>

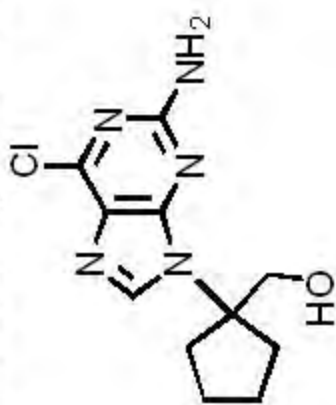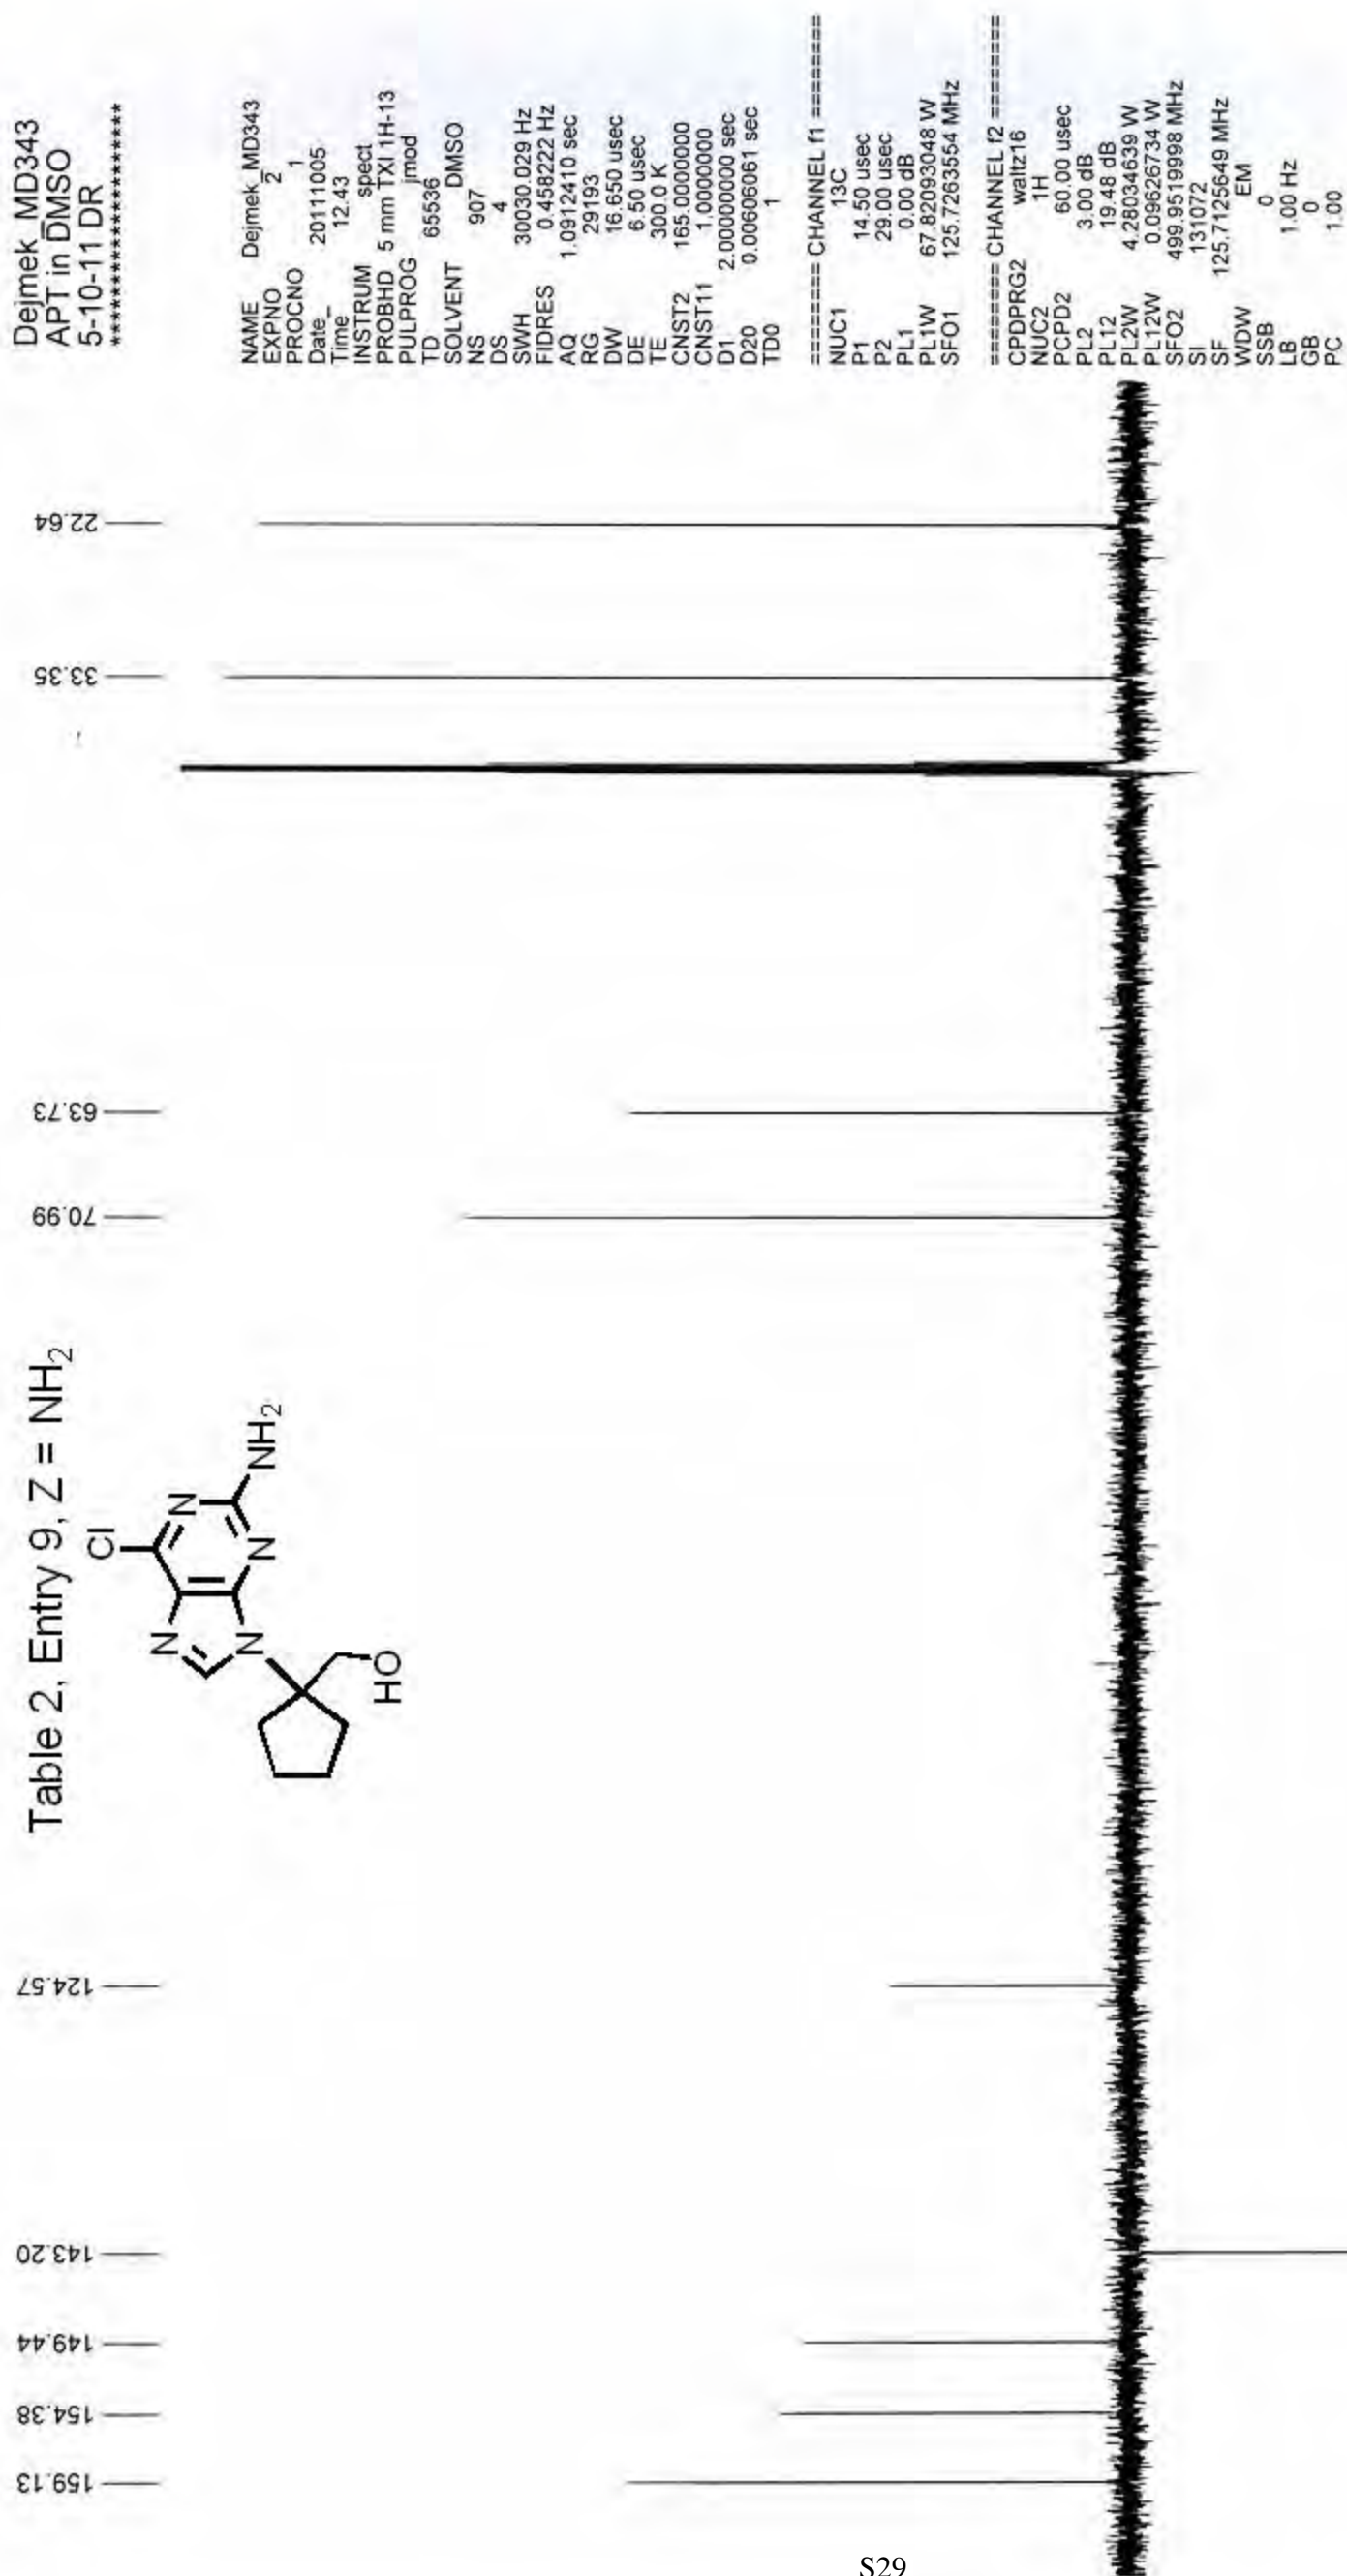

Table 2, Entry 11, Z = H

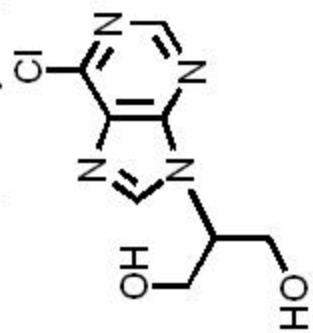

Dejmek\_MD339  
1H NMR in DMSO  
5-10-11 DR  
\*\*\*\*\*

Current Data Parameters  
NAME Dejmek\_MD339  
EXPNO 1  
PROCNO 1

F2 - Acquisition Parameters  
Date\_ 20111005  
Time 14.20  
INSTRUM spect  
PROBHD 5 mm TXI 1H-13  
PULPROG zgpg30  
TD 65536  
SOLVENT DMSO  
NS 32  
DS 0  
SWH 7507.507 Hz  
FIDRES 0.124929 Hz  
AQ 4.0023770 sec  
RG 14.3  
DN 66.600 usec  
DE 6.00 usec  
TE 300.0 K  
D1 1.00000000 sec  
TD0 1

CHANNEL f1  
NUC1 1H  
P1 9.00 usec  
PL1 3.00 dB  
PL1W 4.20034639 W  
SFO1 499.9534997 MHz

F2 - Processing parameters  
SI 131072  
SF 499.9500008 MHz  
WDW nc  
SSB 0  
LB 0.00 Hz  
GB 0  
PC 1.00

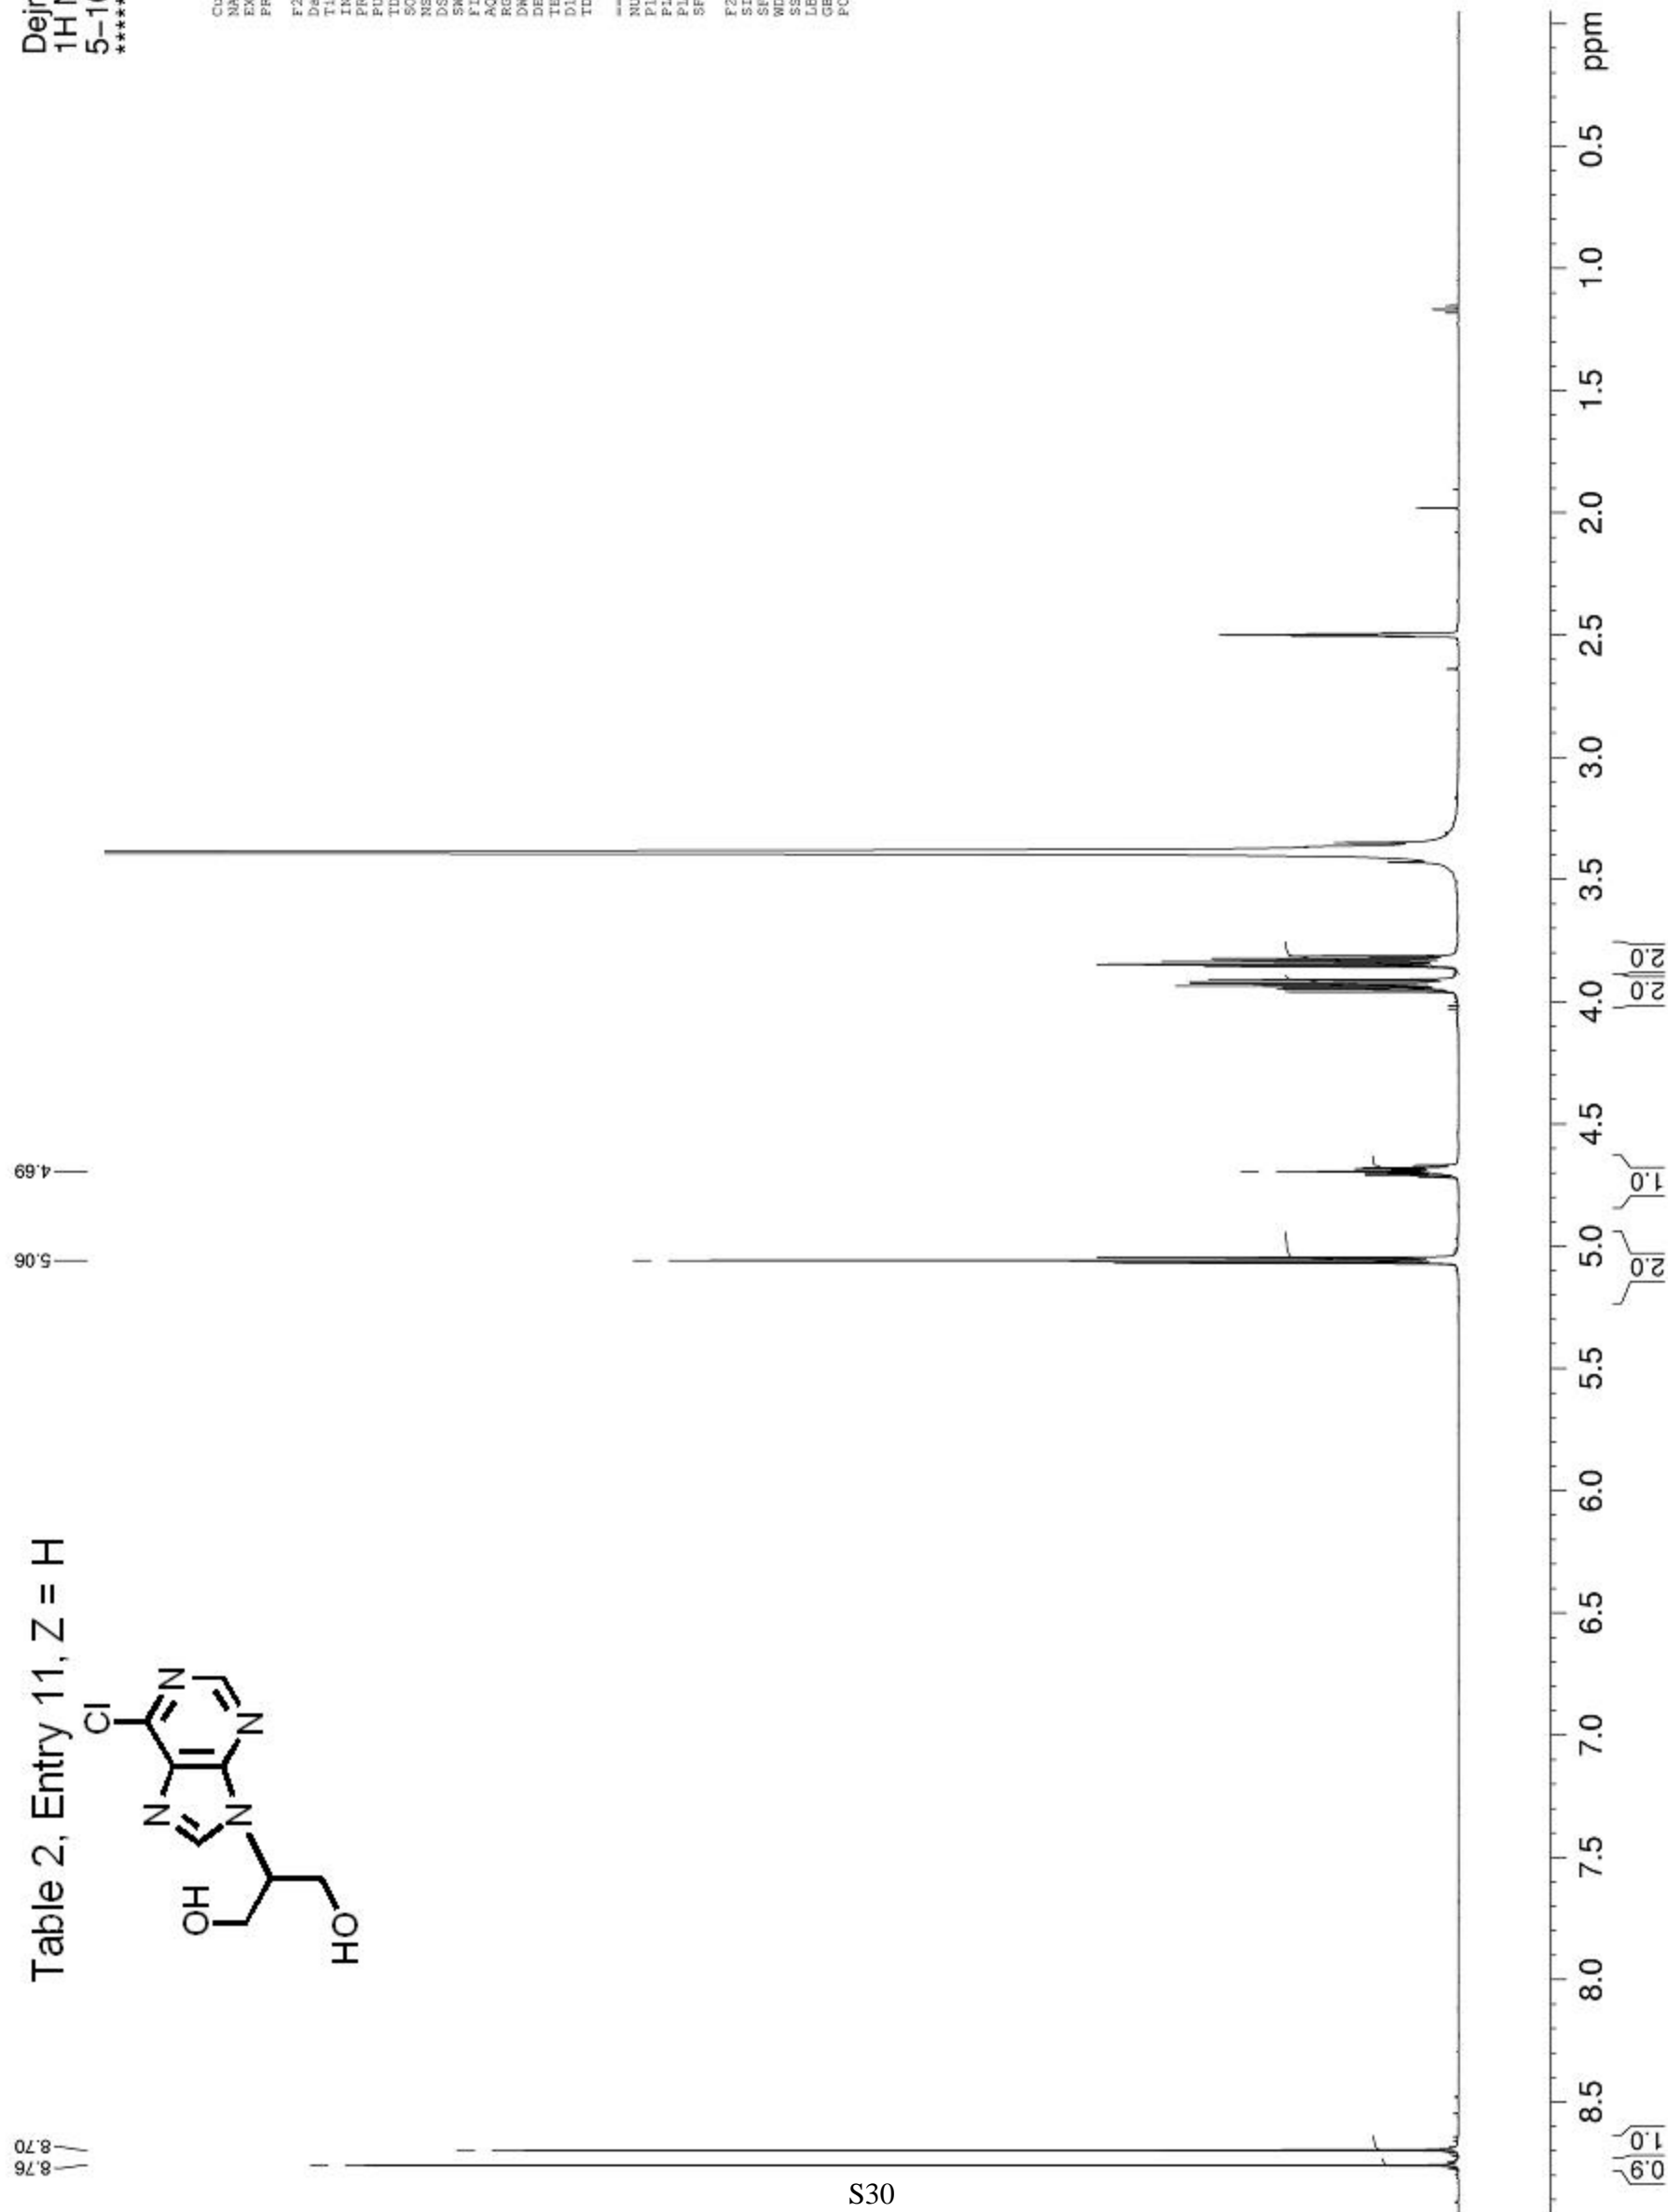

Table 2, Entry 11, Z = H

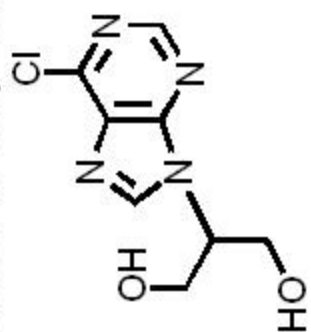

152.67  
151.41  
149.02  
147.24

131.20

60.57  
59.82

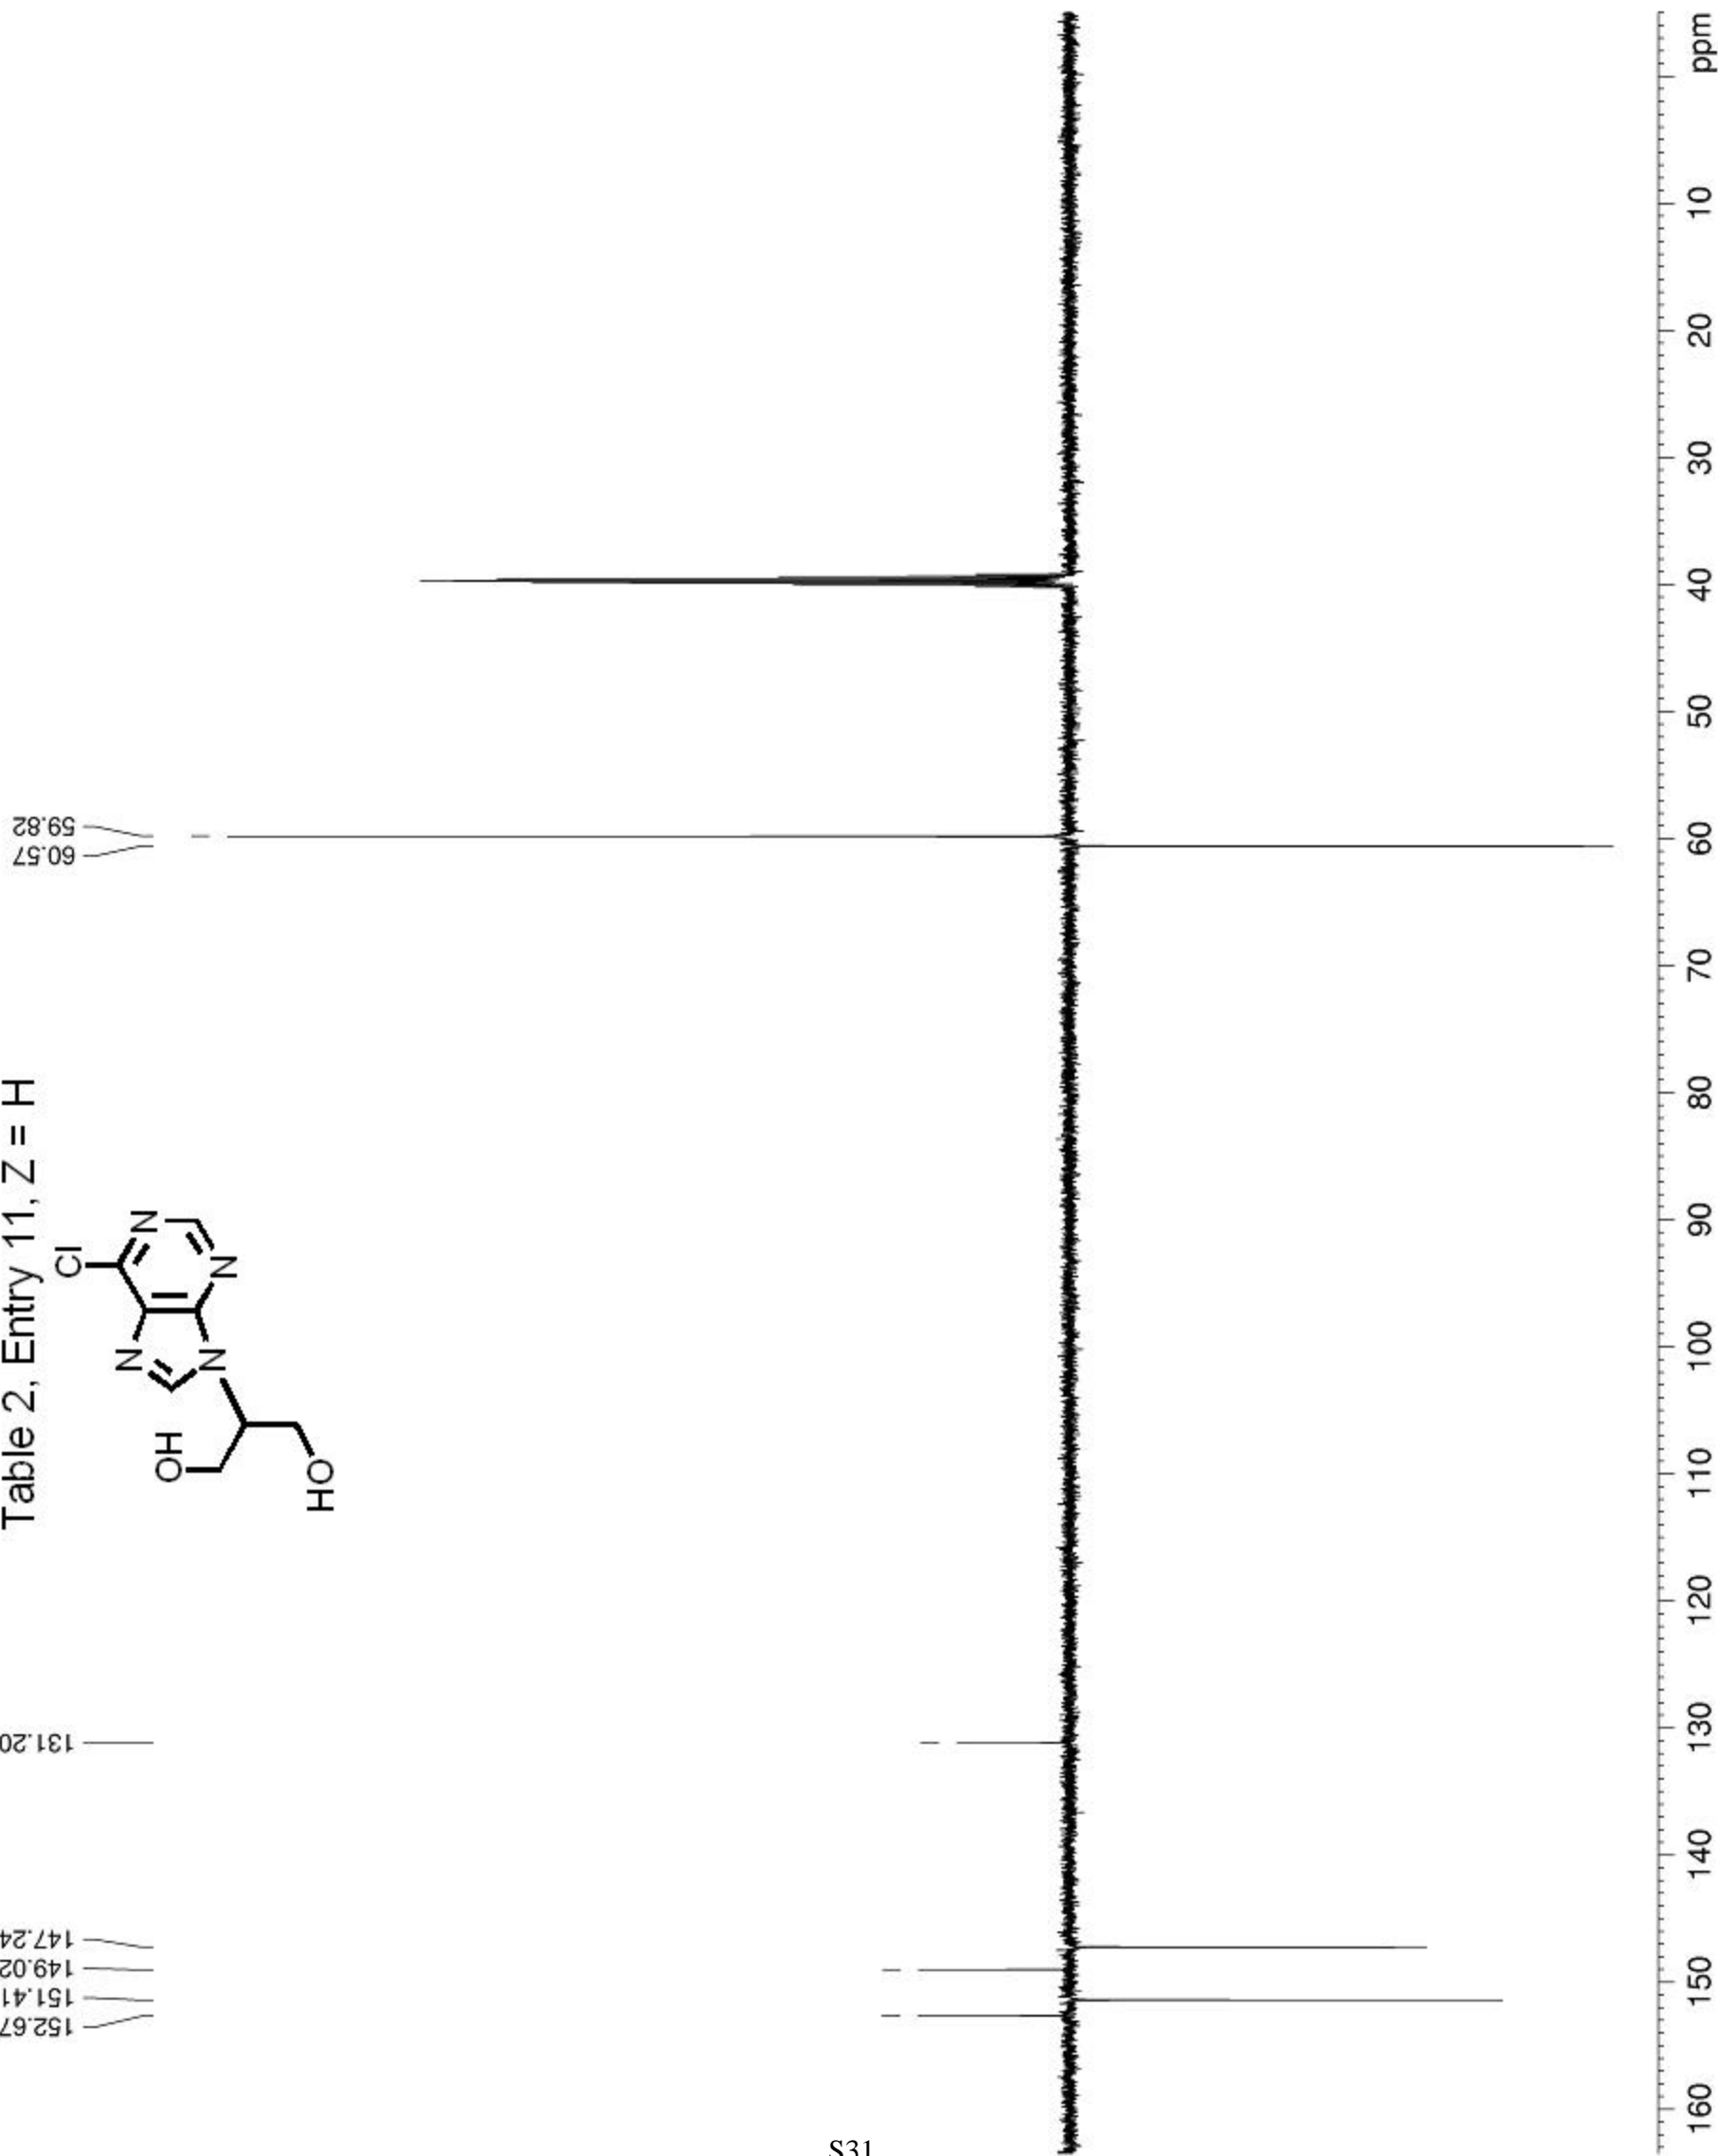

Current Data Parameters  
NAME Dejmek\_MD339  
EXPNO 2  
PROCNO 1  
F2 - Acquisition Parameters  
Date\_ 20111005  
Time 15.08  
INSTRUM spect  
PROBHD 5 mm TXI 1H-13  
PULPROG jmod  
TD 65536  
SOLVENT DMSO  
NS 928  
DS 4  
SWH 30030.029 Hz  
FIDRES 0.458222 Hz  
AQ 1.0912410 sec  
RG 29193  
DW 16.650 usec  
DE 6.50 usec  
TE 300.0 K  
CNST2 165.0000000  
CNST11 1.0000000  
D1 2.00000000 sec  
D20 0.00606061 sec  
TD0 1

==== CHANNEL f1 =====  
NUC1 13C  
P1 14.50 usec  
P2 29.00 usec  
PL1 0.00 dB  
PL1W 67.82093048 W  
SFO1 125.7263554 MHz

==== CHANNEL f2 =====  
CPDPRG2 waitz16  
NUC2 1H  
PCPD2 60.00 usec  
PL2 3.00 dB  
PL12 19.48 dB  
PL2W 4.28034639 W  
PL12W 0.09626734 W  
SFO2 499.9519998 MHz

F2 - Processing parameters  
SI 131072  
SF 125.7125562 MHz  
WDW EM  
SSB 0  
LB 1.00 Hz  
GB 0  
PC 1.00

Dejmek\_MD340  
1H NMR in DMSO  
30-9-11 DR  
\*\*\*\*\*

NAME Dejmek\_MD340  
EXPNO 1  
PROCNO 1  
Date\_ 20110930  
Time\_ 13.05  
INSTRUM spect  
PROBHD 5 mm TXI 1H-  
PULPROG zg30  
TD 60094  
SOLVENT DMSO  
NS 32  
DS 0  
SWH 7507.507 Hz  
FIDRES 0.124929 Hz  
AQ 4.0023770 sec  
RG 14.3  
DW 66.600 usec  
DE 6.00 usec  
TE 300.0 K  
D1 1.00000000 sec  
TD0 1

==== CHANNEL f1 =  
NUC1 1H  
P1 9.00 usec  
PL1 3.00 dB  
PL1W 4.28034639 V  
SFO1 499.9534997 M  
SI 131072  
SF 499.9500006 MHz  
WDW no  
SSB 0  
LB 0.00 Hz  
GB 0  
PC 1.00

Table 2, Entry 11, Z = NH<sub>2</sub>

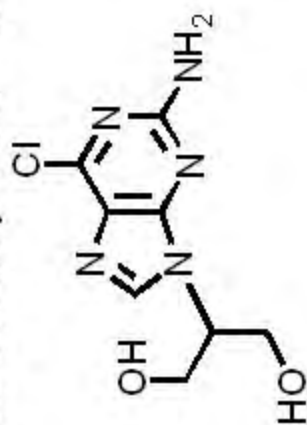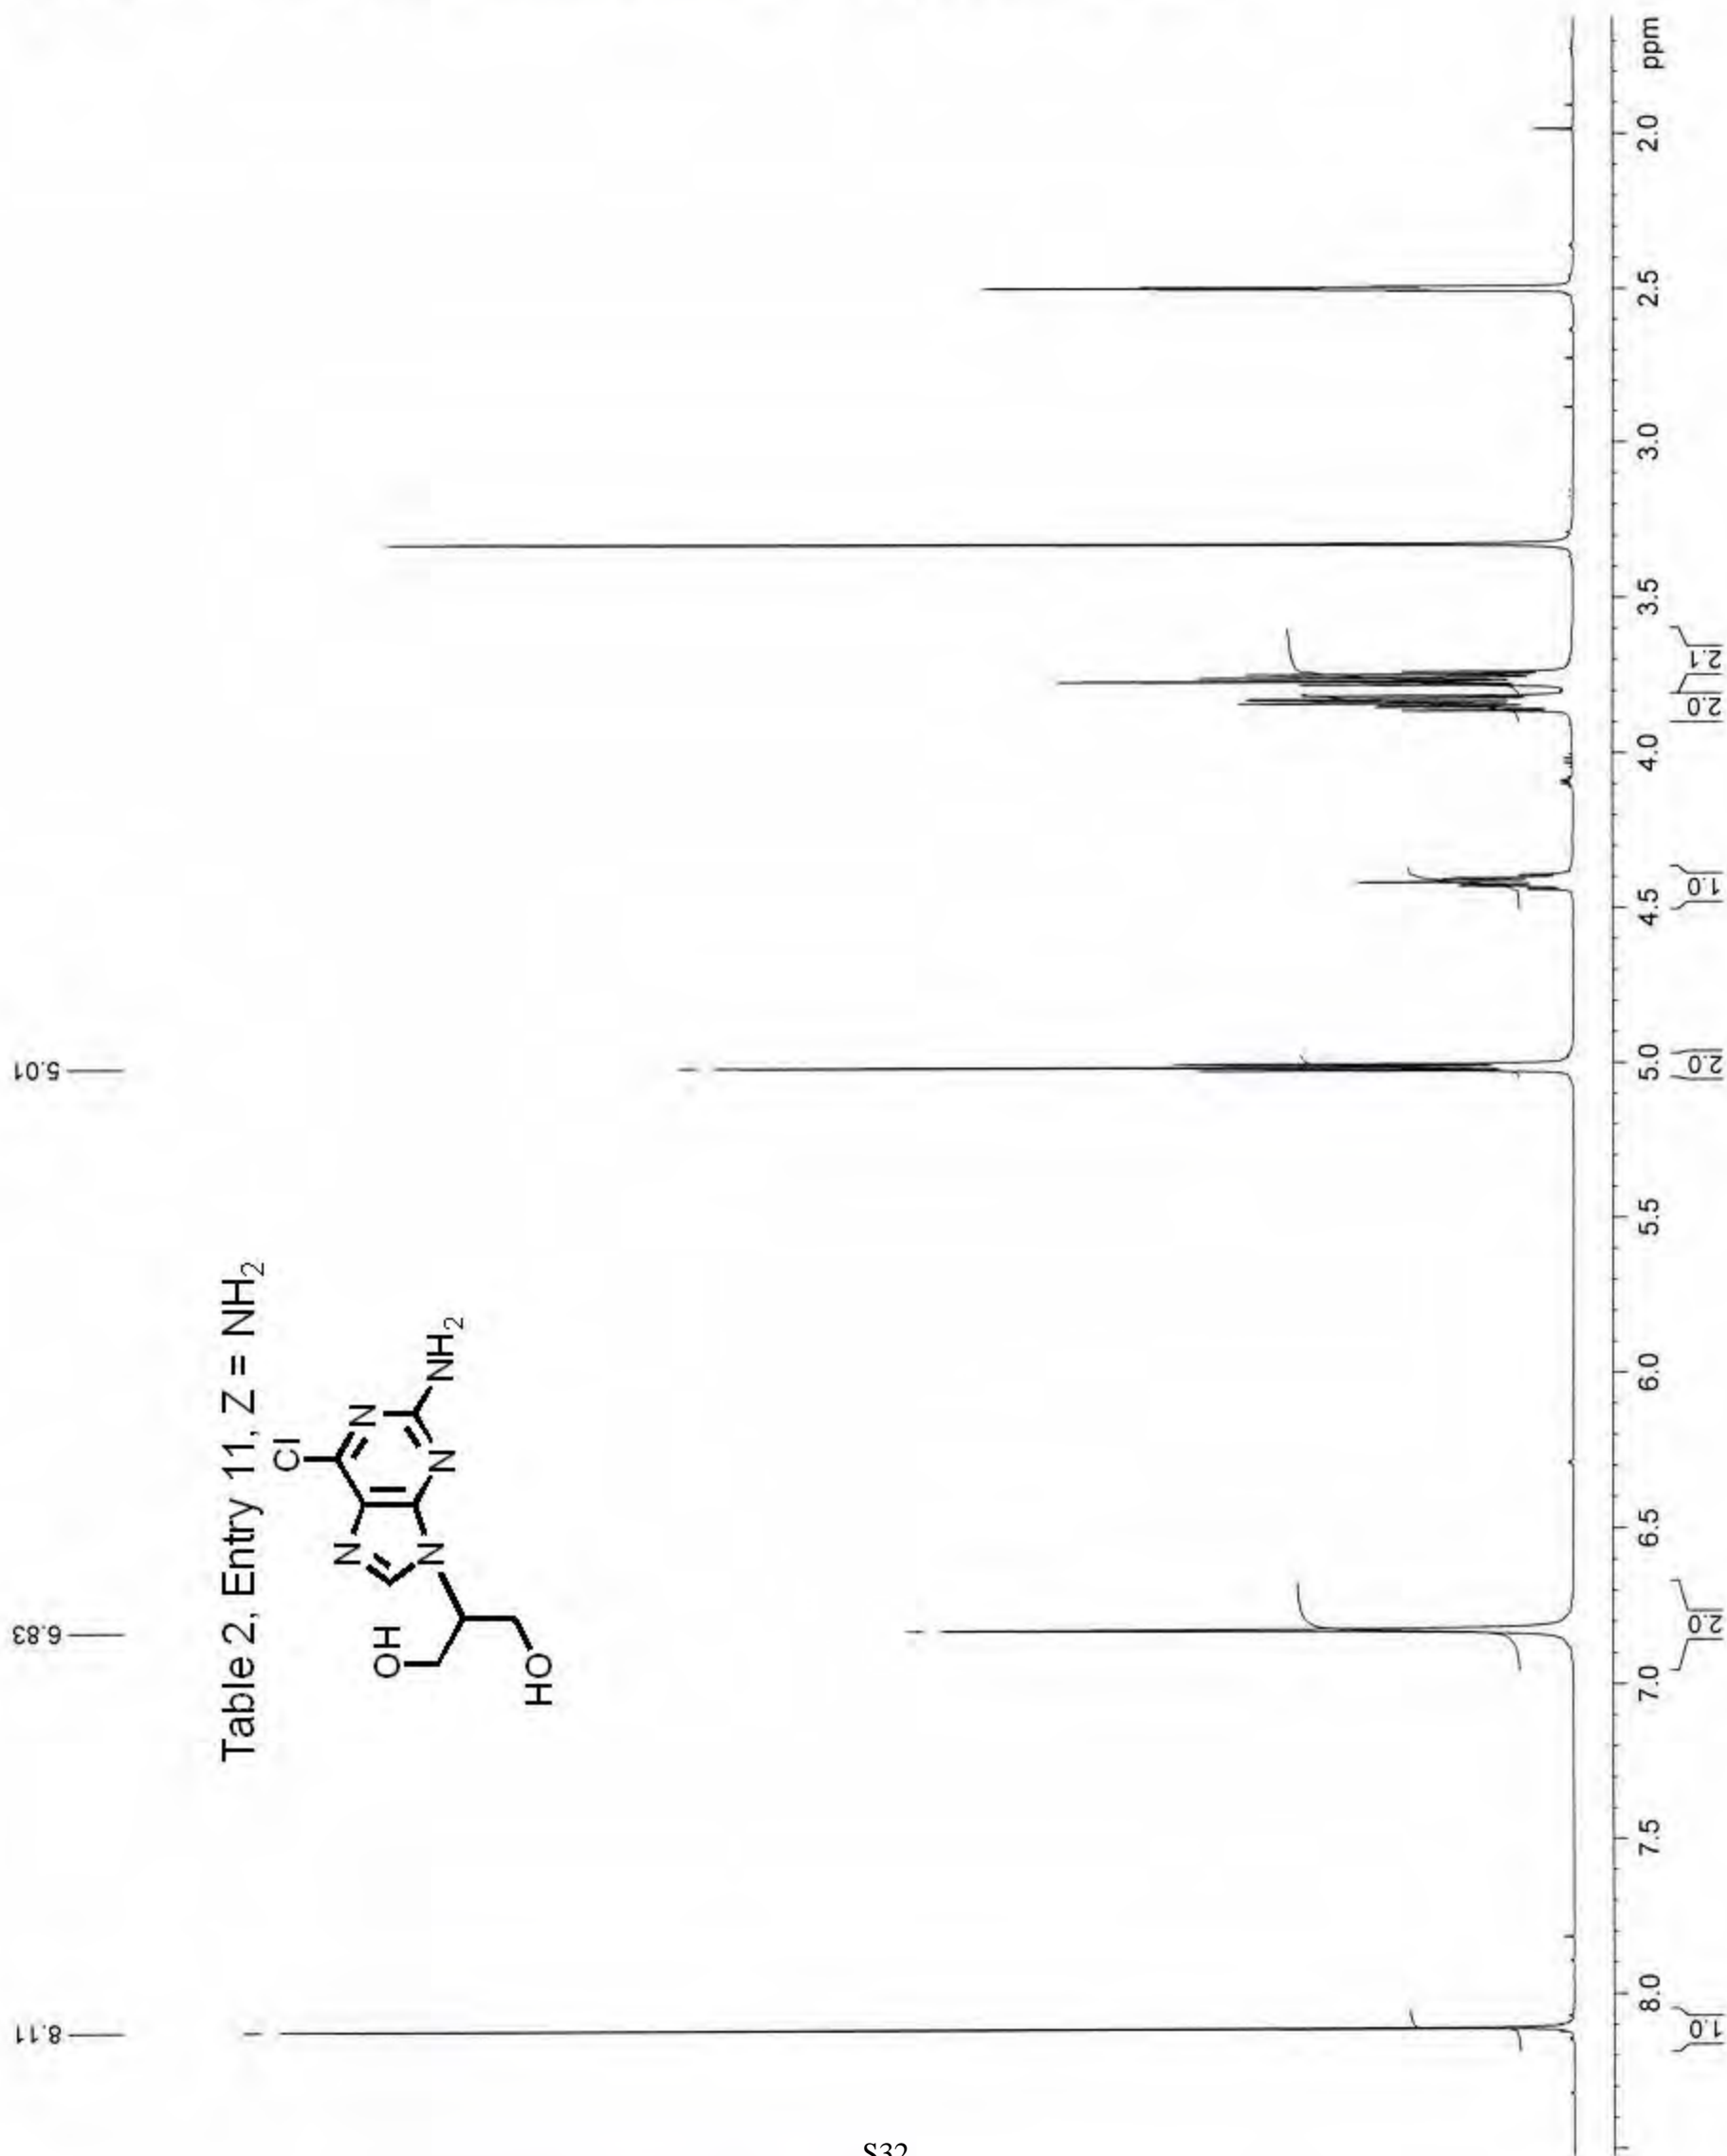



Table 2, Entry 11, Z = NH<sub>2</sub>

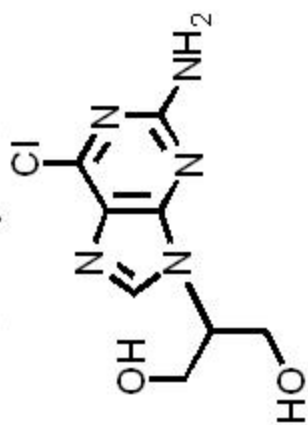

59.74  
59.21

123.65

142.85

149.28

154.64

159.66

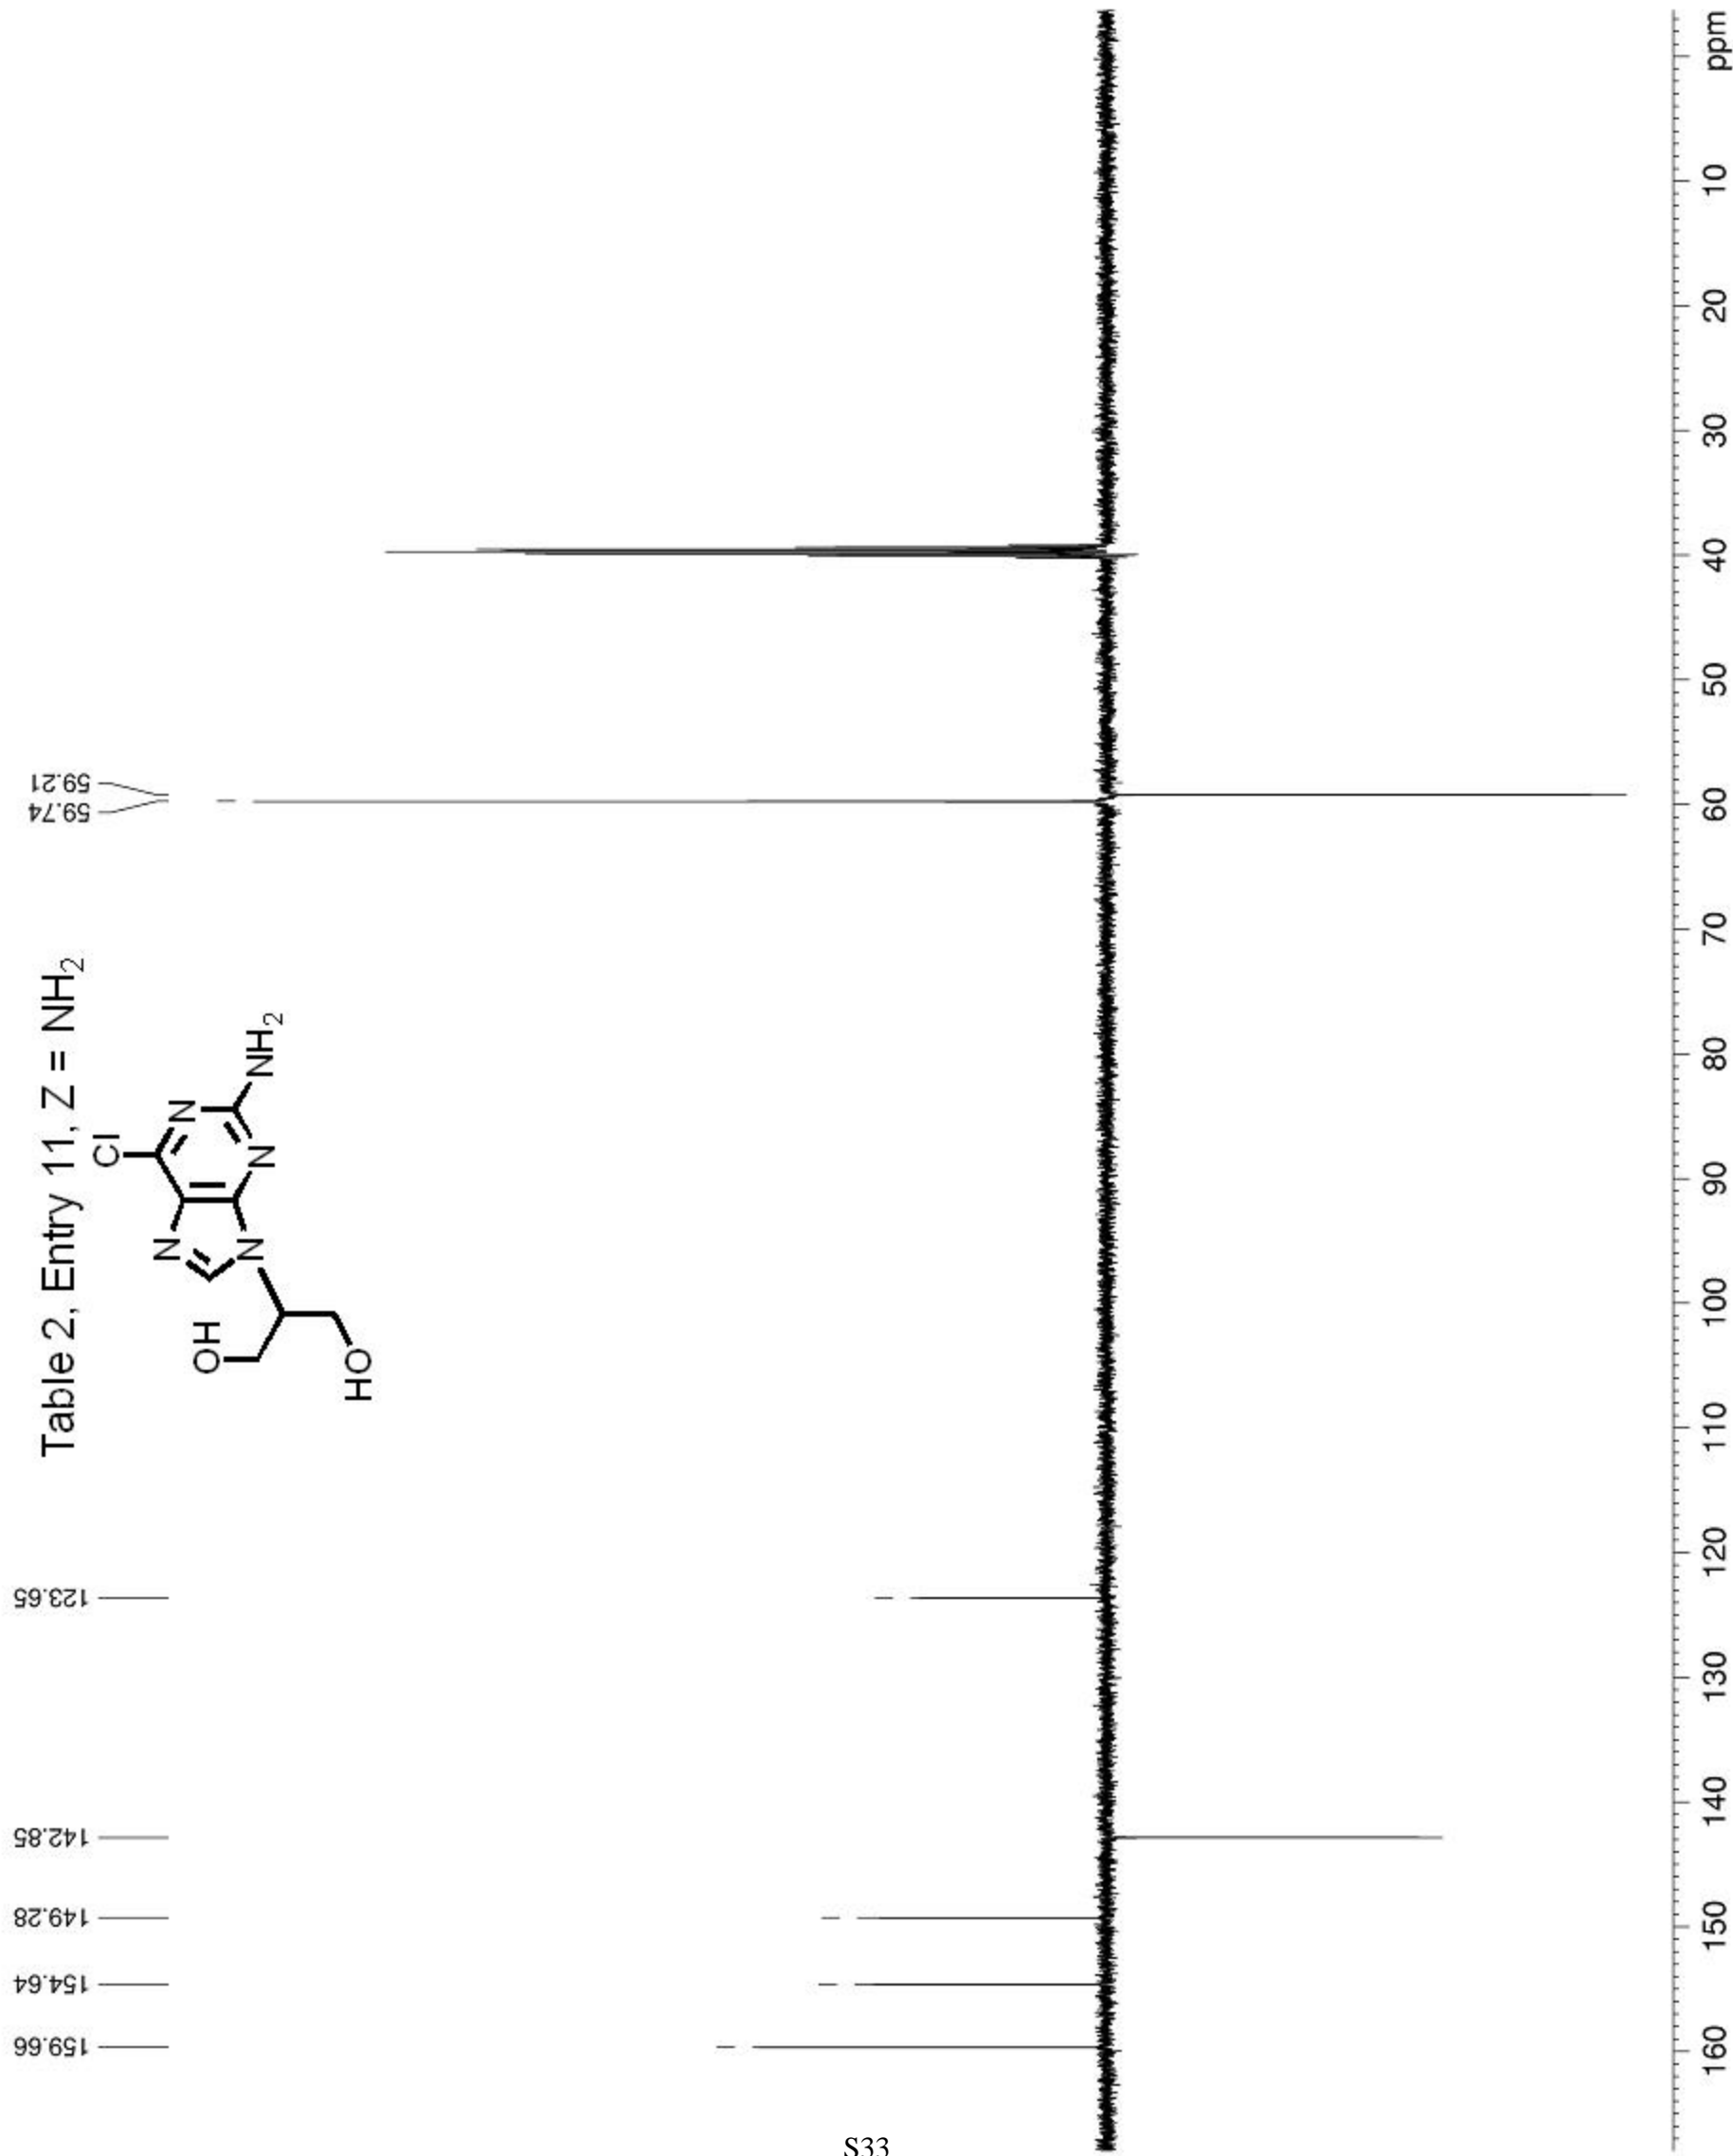

Dejmek\_MD340  
APT in DMSO  
30-9-11 DR  
\*\*\*\*\*

Current Data Parameters  
NAME Dejmek\_MD340  
EXPNO 2  
PROCNO 1

F2 - Acquisition Parameters  
Date\_ 20110930  
Time 13.50  
INSTRUM spect  
PROBHD 5 mm TXI 1H-13  
PULPROG jmod  
TD 65536  
SOLVENT DMSO  
NS 869  
DS 4  
SWH 30030.029 Hz  
FIDRES 0.458222 Hz  
AQ 1.0912410 sec  
RG 29193  
DW 16.650 usec  
DE 6.50 usec  
TE 300.0 K  
CNST2 165.0000000  
CNST11 1.0000000  
D1 2.000000000 sec  
D20 0.00606061 sec  
TD0 1

==== CHANNEL f1 =====  
NUC1 13C  
P1 14.50 usec  
P2 29.00 usec  
PL1 0.00 dB  
PL1W 67.82093048 W  
SFO1 125.7263554 MHz

==== CHANNEL f2 =====  
CPDPRG2 waitz16  
NUC2 1H  
PCPD2 60.00 usec  
PL2 3.00 dB  
PL12 19.48 dB  
PL2W 4.28034639 W  
PL12W 0.09626734 W  
SFO2 499.9519998 MHz

F2 - Processing parameters  
SI 131072  
SF 125.7125639 MHz  
WDW EM  
SSB 0  
LB 1.00 Hz  
GB 0  
PC 1.00

Dejmek\_MD346  
1H-NMR in DMSO  
30.9.2011 DR  
\*\*\*\*\*

NAME Dejmek\_MD346  
EXPNO 1  
PROCNO 1  
Date\_ 20110930  
Time 10.07  
INSTRUM spect  
PROBHD 5 mm CPTCI 1H-  
PULPROG zg30  
TD 72114  
SOLVENT DMSO  
NS 32  
DS 0  
SWH 9014.423 Hz  
FIDRES 0.125002 Hz  
AQ 3.9999733 sec  
RG 9  
DW 55.467 usec  
DE 20.00 usec  
TE 300.0 K  
D1 1.00000000 sec  
TD0 1

==== CHANNEL f1 =====  
NUC1 1H  
P1 10.00 usec  
PL1 8.10 dB  
PL1W 5.29101372 W  
SFO1 600.1330006 MHz  
SI 131072  
SF 600.1300066 MHz  
WDW no  
SSB 0  
LB 0.00 Hz  
GB 0  
PC 0.50

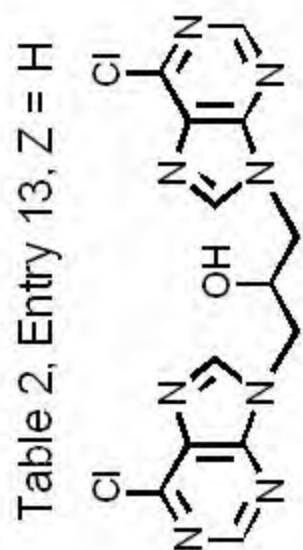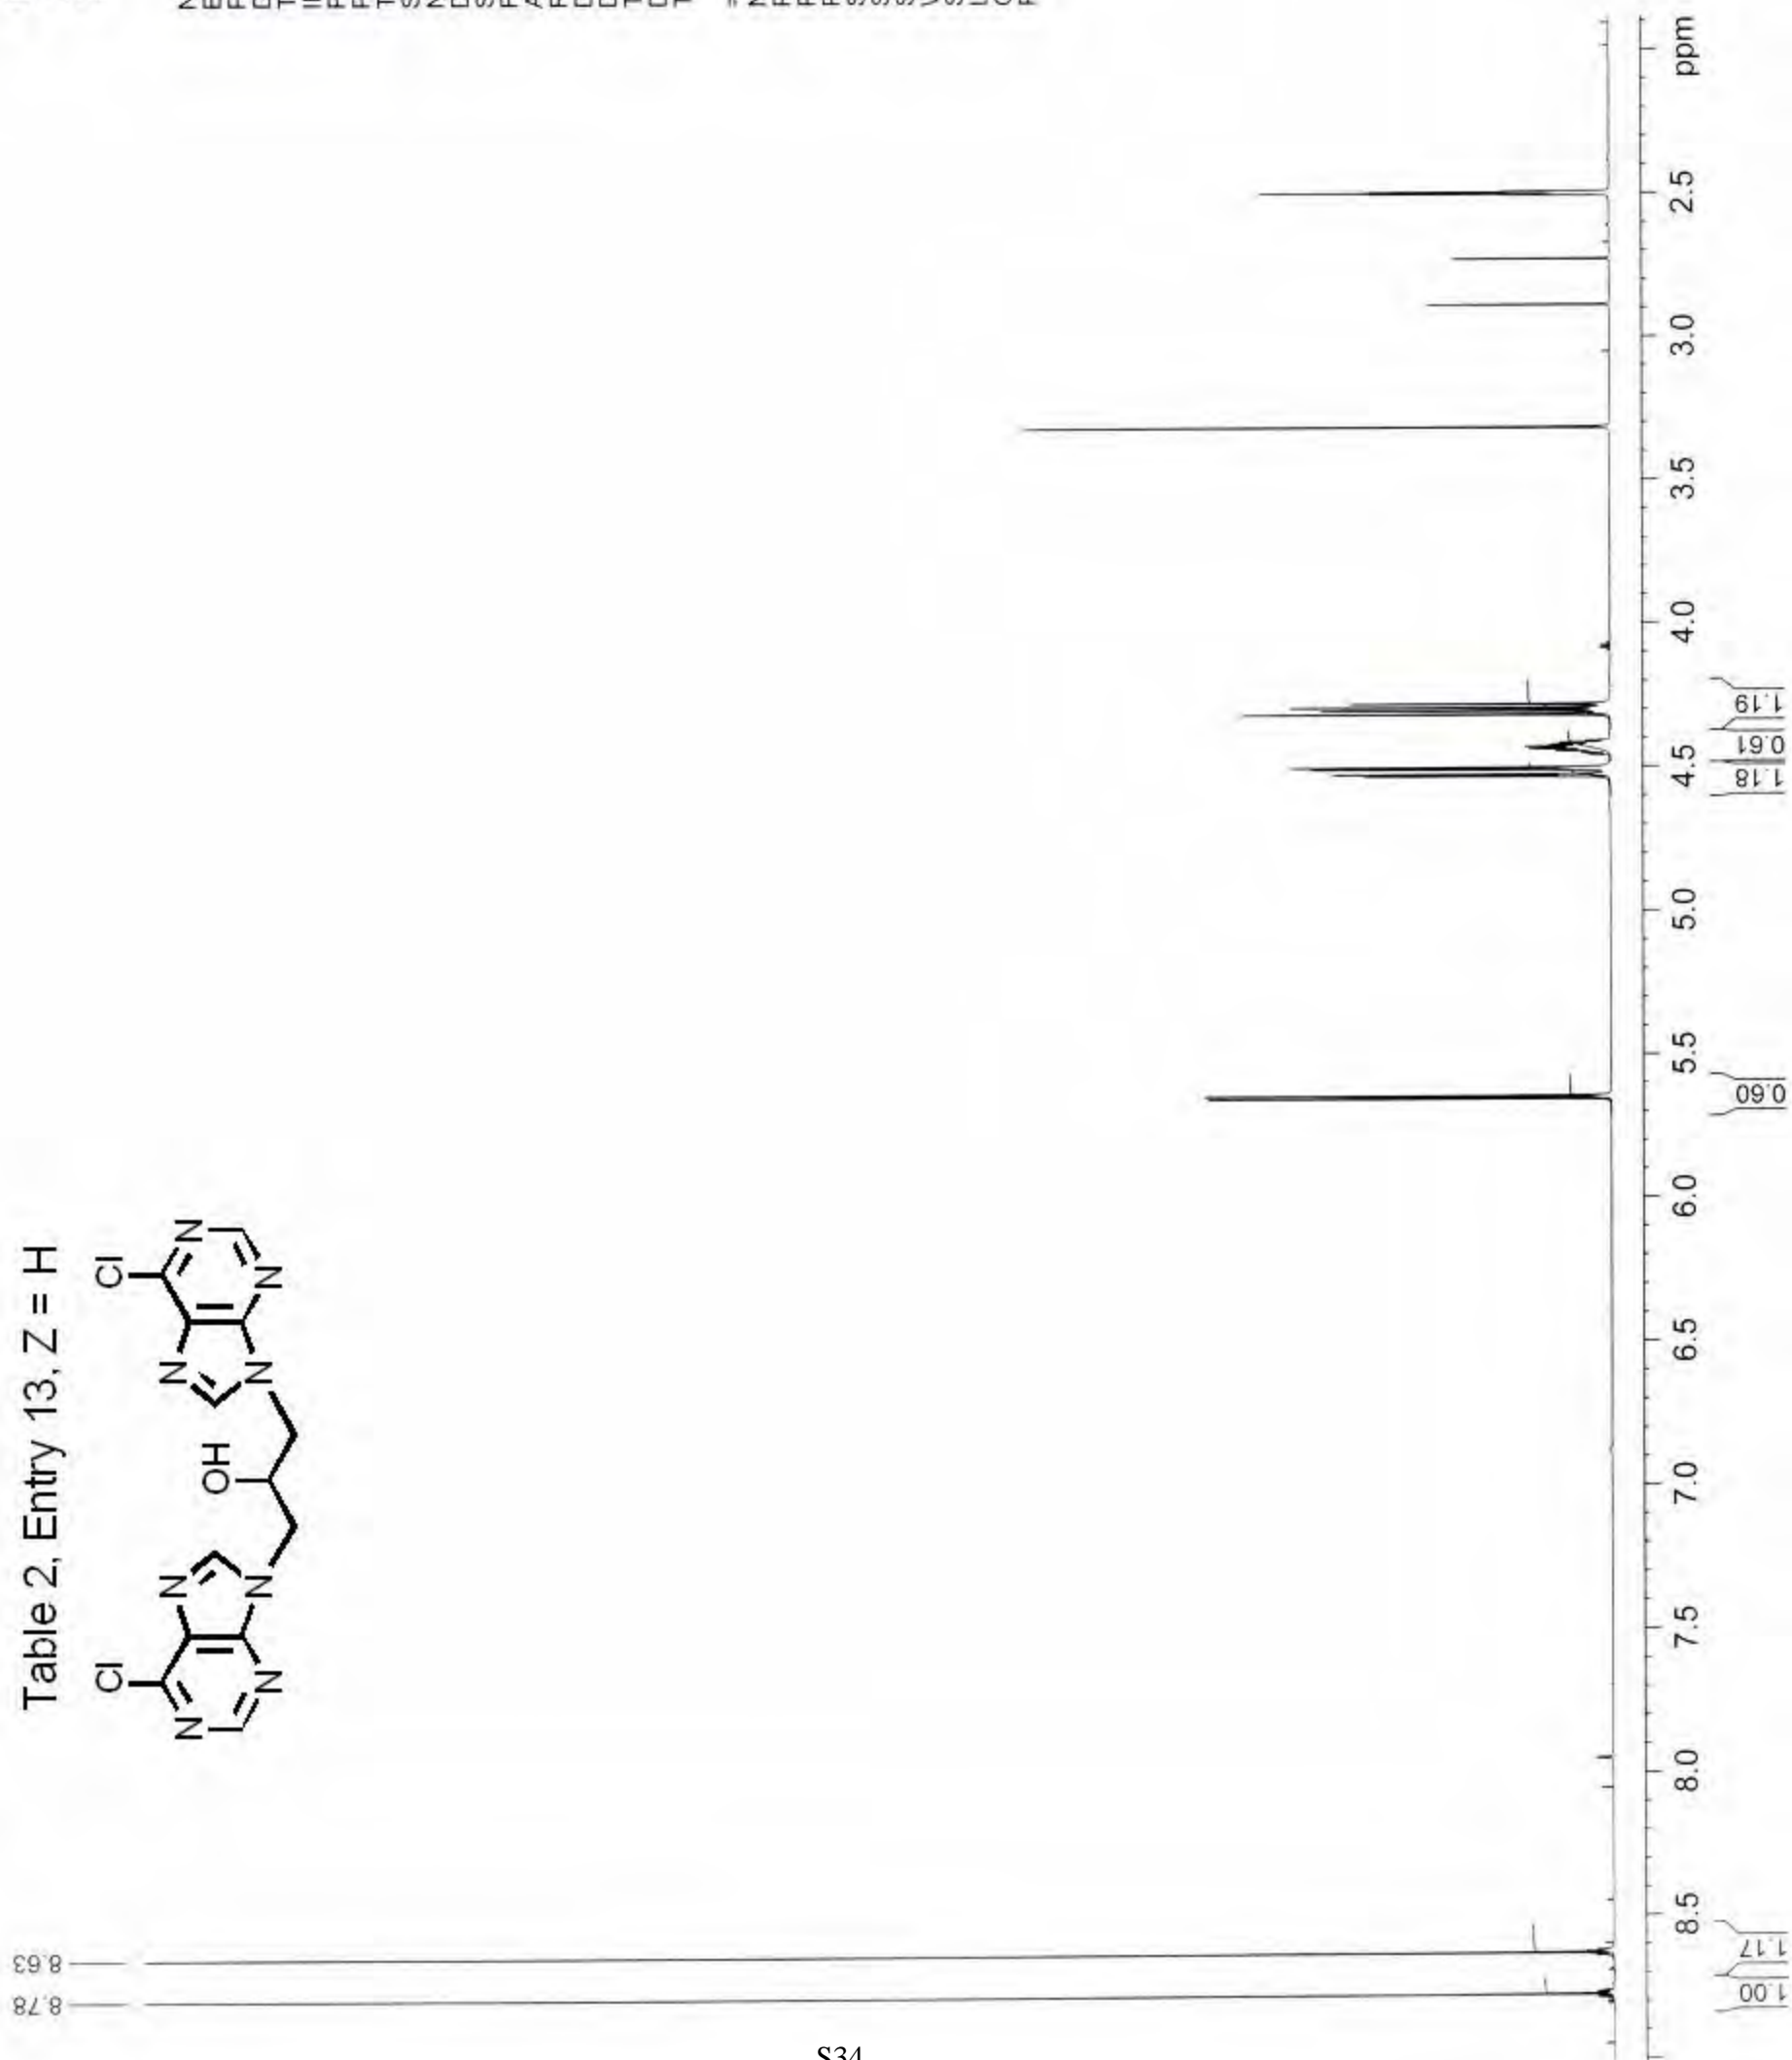

Table 2, Entry 13, Z = H

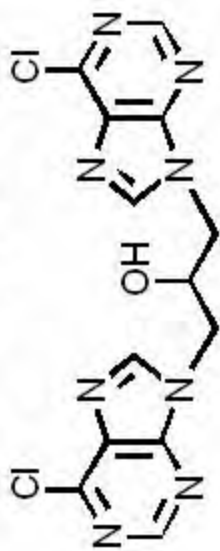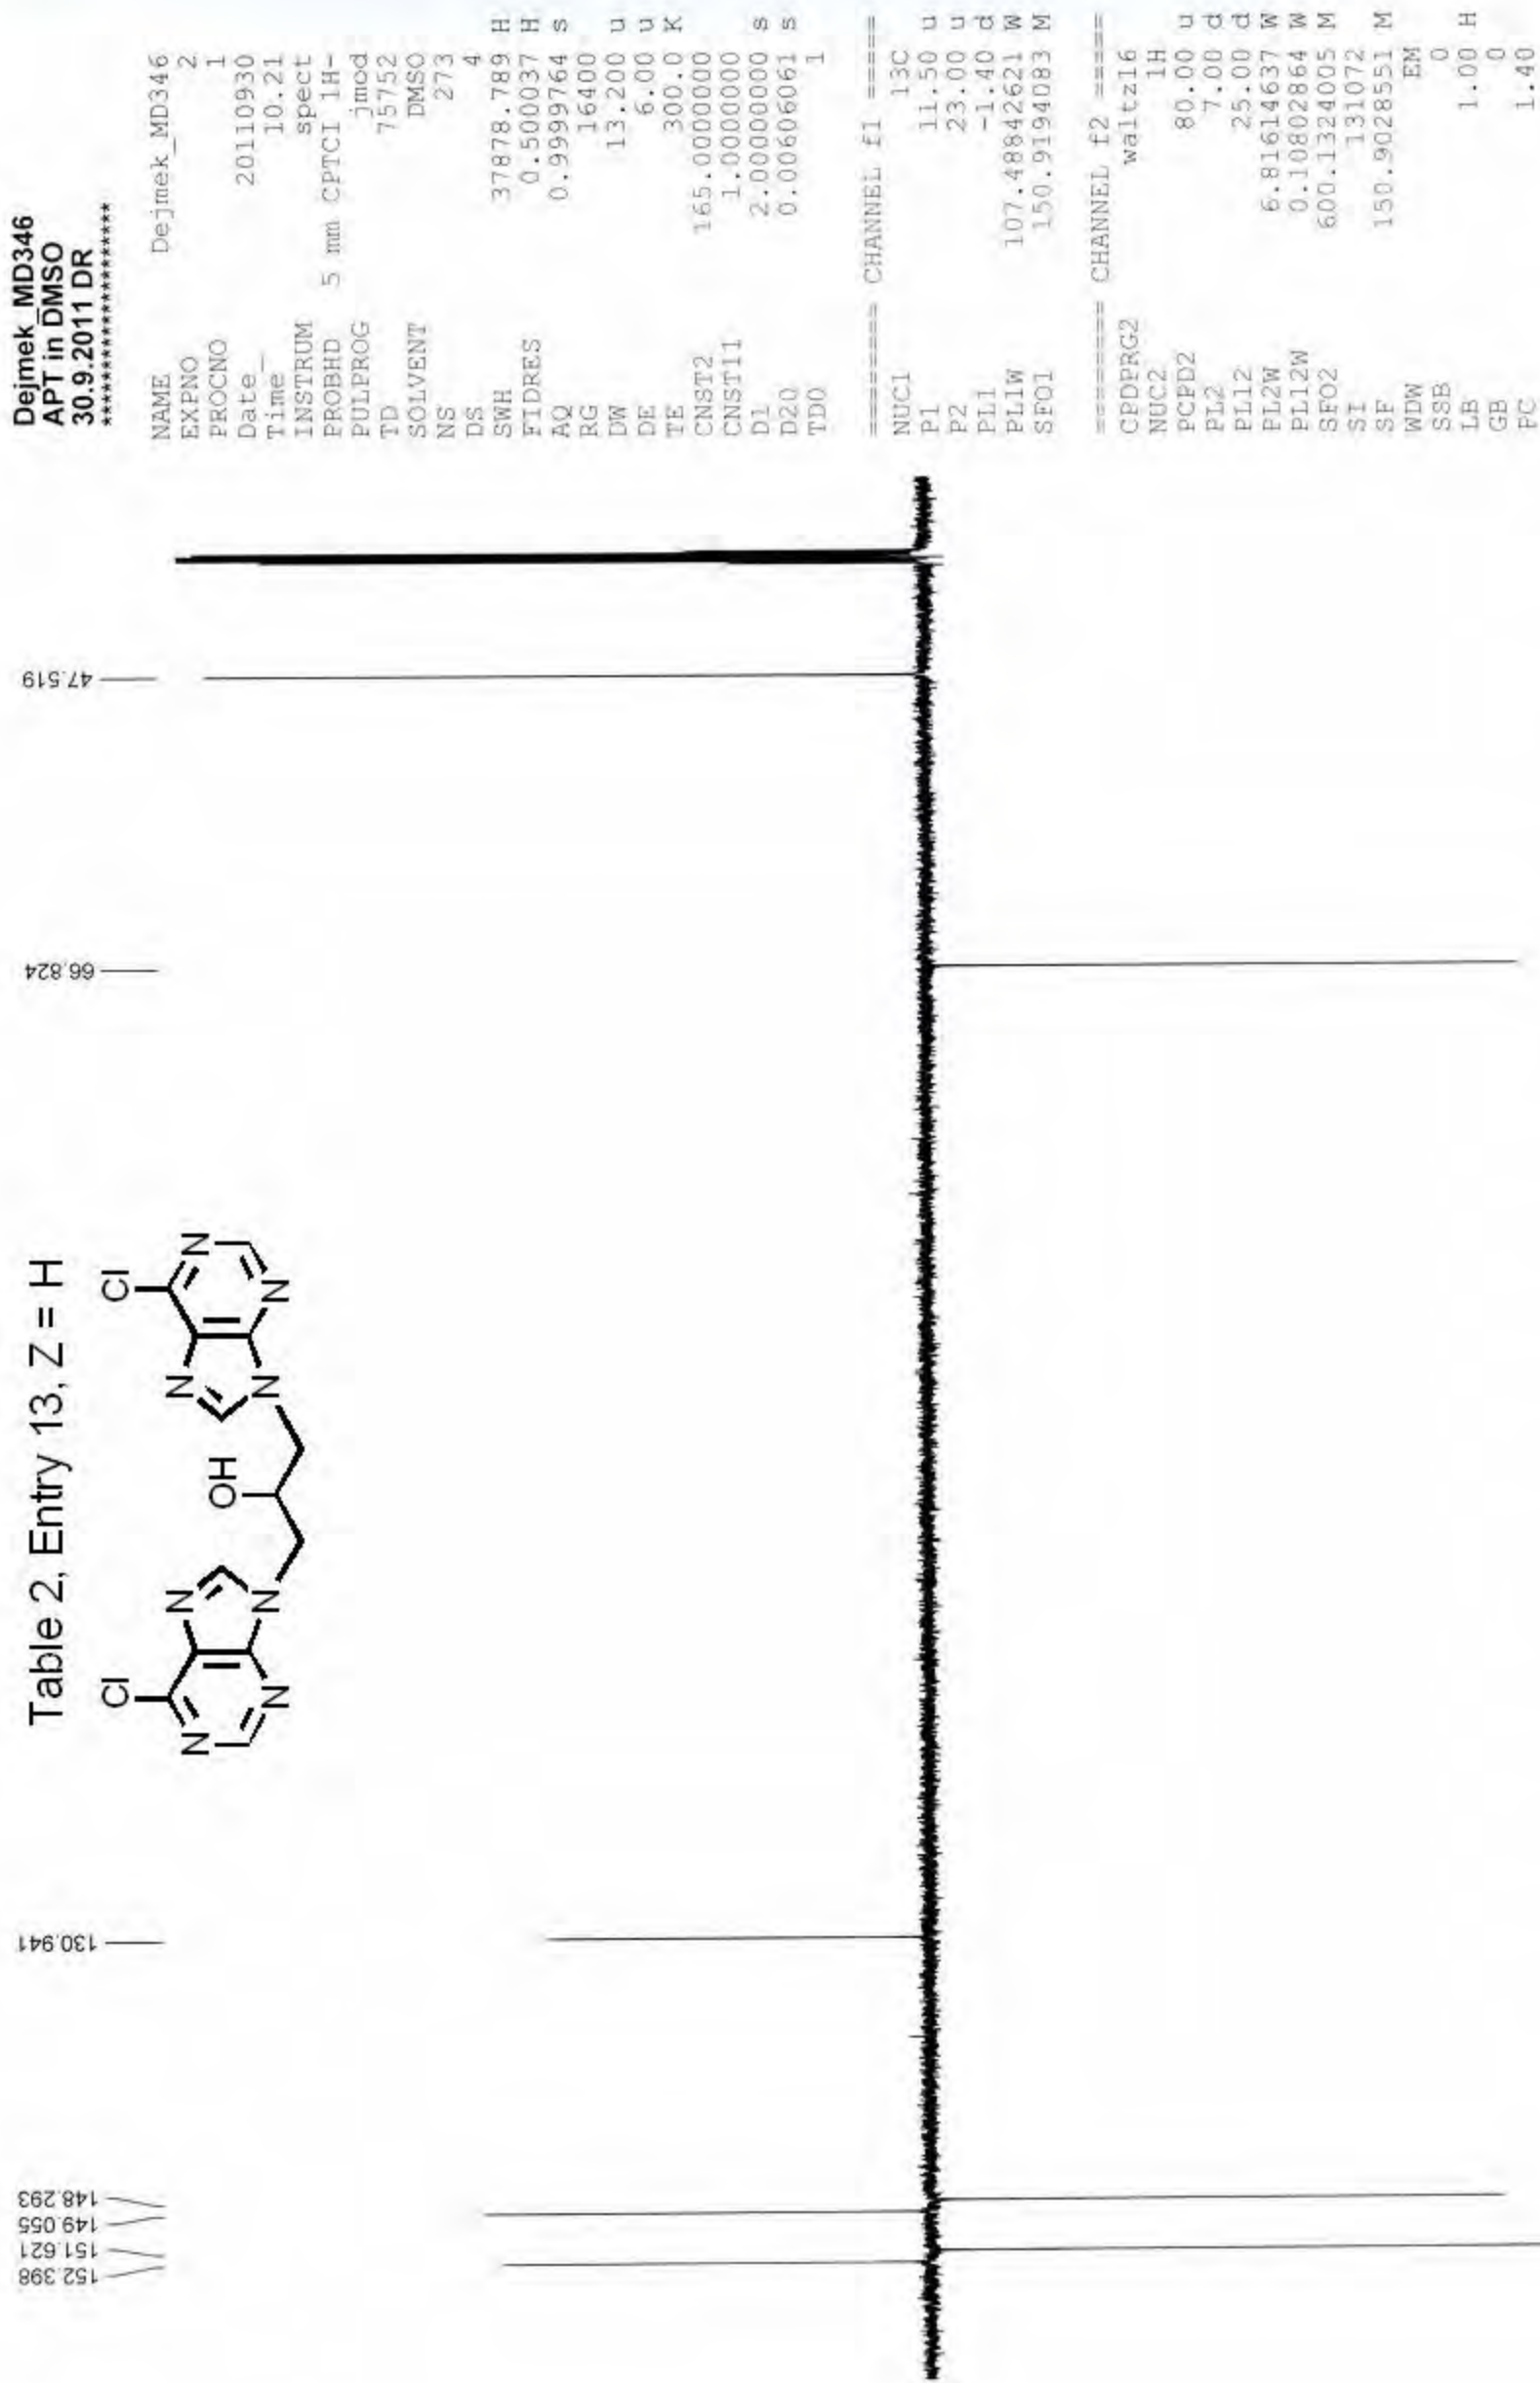

Table 2, Entry 13, Z = NH<sub>2</sub>

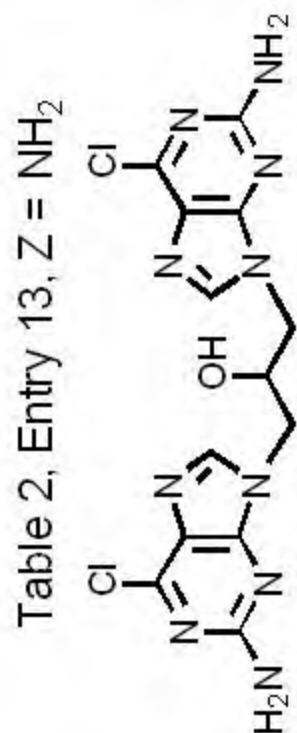

5.99  
5.90

6.88

8.05

Dejmek\_MD345  
1H-NMR in DMSO  
30.9.2011 DR  
\*\*\*\*\*

NAME Dejmek\_MD345  
EXPNO 1  
PROCNO 1  
Date\_ 20110930  
Time 9.16  
INSTRUM spect  
PROBHD 5 mm CPTCI 1H-  
PULPROG zg30  
TD 72114  
SOLVENT DMSO  
NS 32  
DS 0  
SWH 9014.423 Hz  
FIDRES 0.125002 Hz  
AQ 3.9999733 sec  
RG 9  
DW 55.467 usec  
DE 20.00 usec  
TE 300.0 K  
D1 1.00000000 sec  
TD0 1

==== CHANNEL f1 =====  
NUC1 1H  
P1 10.00 usec  
PL1 8.10 dB  
PL1W 5.29101372 W  
SFO1 600.1330006 MHz  
SI 131072  
SF 600.1300065 MHz  
WDW no  
SSB 0  
LB 0.00 Hz  
GB 0  
PC 0.50

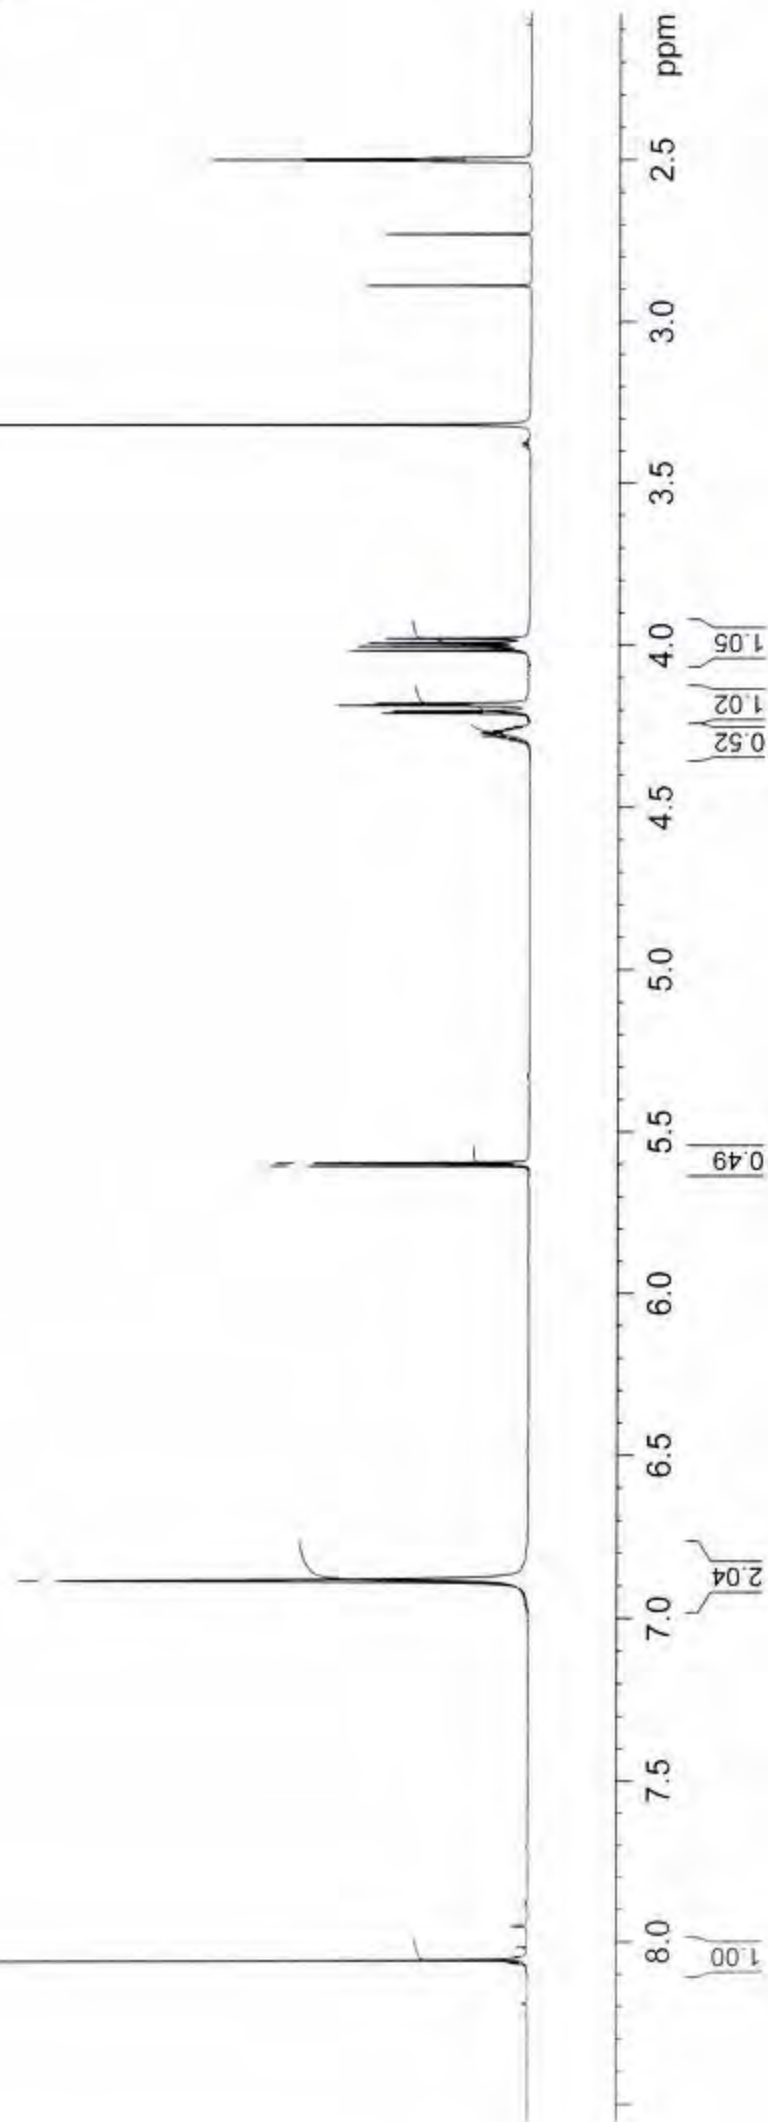

Dejmek\_MD345  
 APT in DMSO  
 30.9.2011 DR  
 \*\*\*\*\*

NAME Dejmek\_MD345  
 EXPNO 2  
 PROCNO 1  
 Date\_ 20110930  
 Time\_ 9.40  
 INSTRUM spect  
 PROBHD 5 mm CPTCI 1H-  
 PULPROG jmod  
 TD 75752  
 SOLVENT DMSO  
 NS 459  
 DS 4  
 SWH 37878.789 H  
 FIDRES 0.500037 H  
 AQ 0.9999764 s  
 RG 16400  
 DW 13.200 u  
 DE 6.00 u  
 TE 300.0 K  
 CNST2 165.000000  
 CNST11 1.0000000  
 D1 2.0000000 s  
 D20 0.00606061 s  
 TD0 1

==== CHANNEL f1 =====  
 NUC1 13C  
 P1 11.50 u  
 P2 23.00 u  
 PL1 -1.40 d  
 PL1W 107.48842621 W  
 SFO1 150.9194083 M

==== CHANNEL f2 =====  
 CPDPRG2 waltz16  
 NUC2 1H  
 PCPD2 80.00 u  
 PL2 7.00 d  
 PL12 25.00 d  
 PL2W 6.81614637 W  
 PL12W 0.10802864 W  
 SFO2 600.1324005 M  
 SI 131072  
 SE 150.9028542 M  
 WDW EM  
 SSB 0  
 LB 1.00 H  
 GB 0  
 PC 1.40

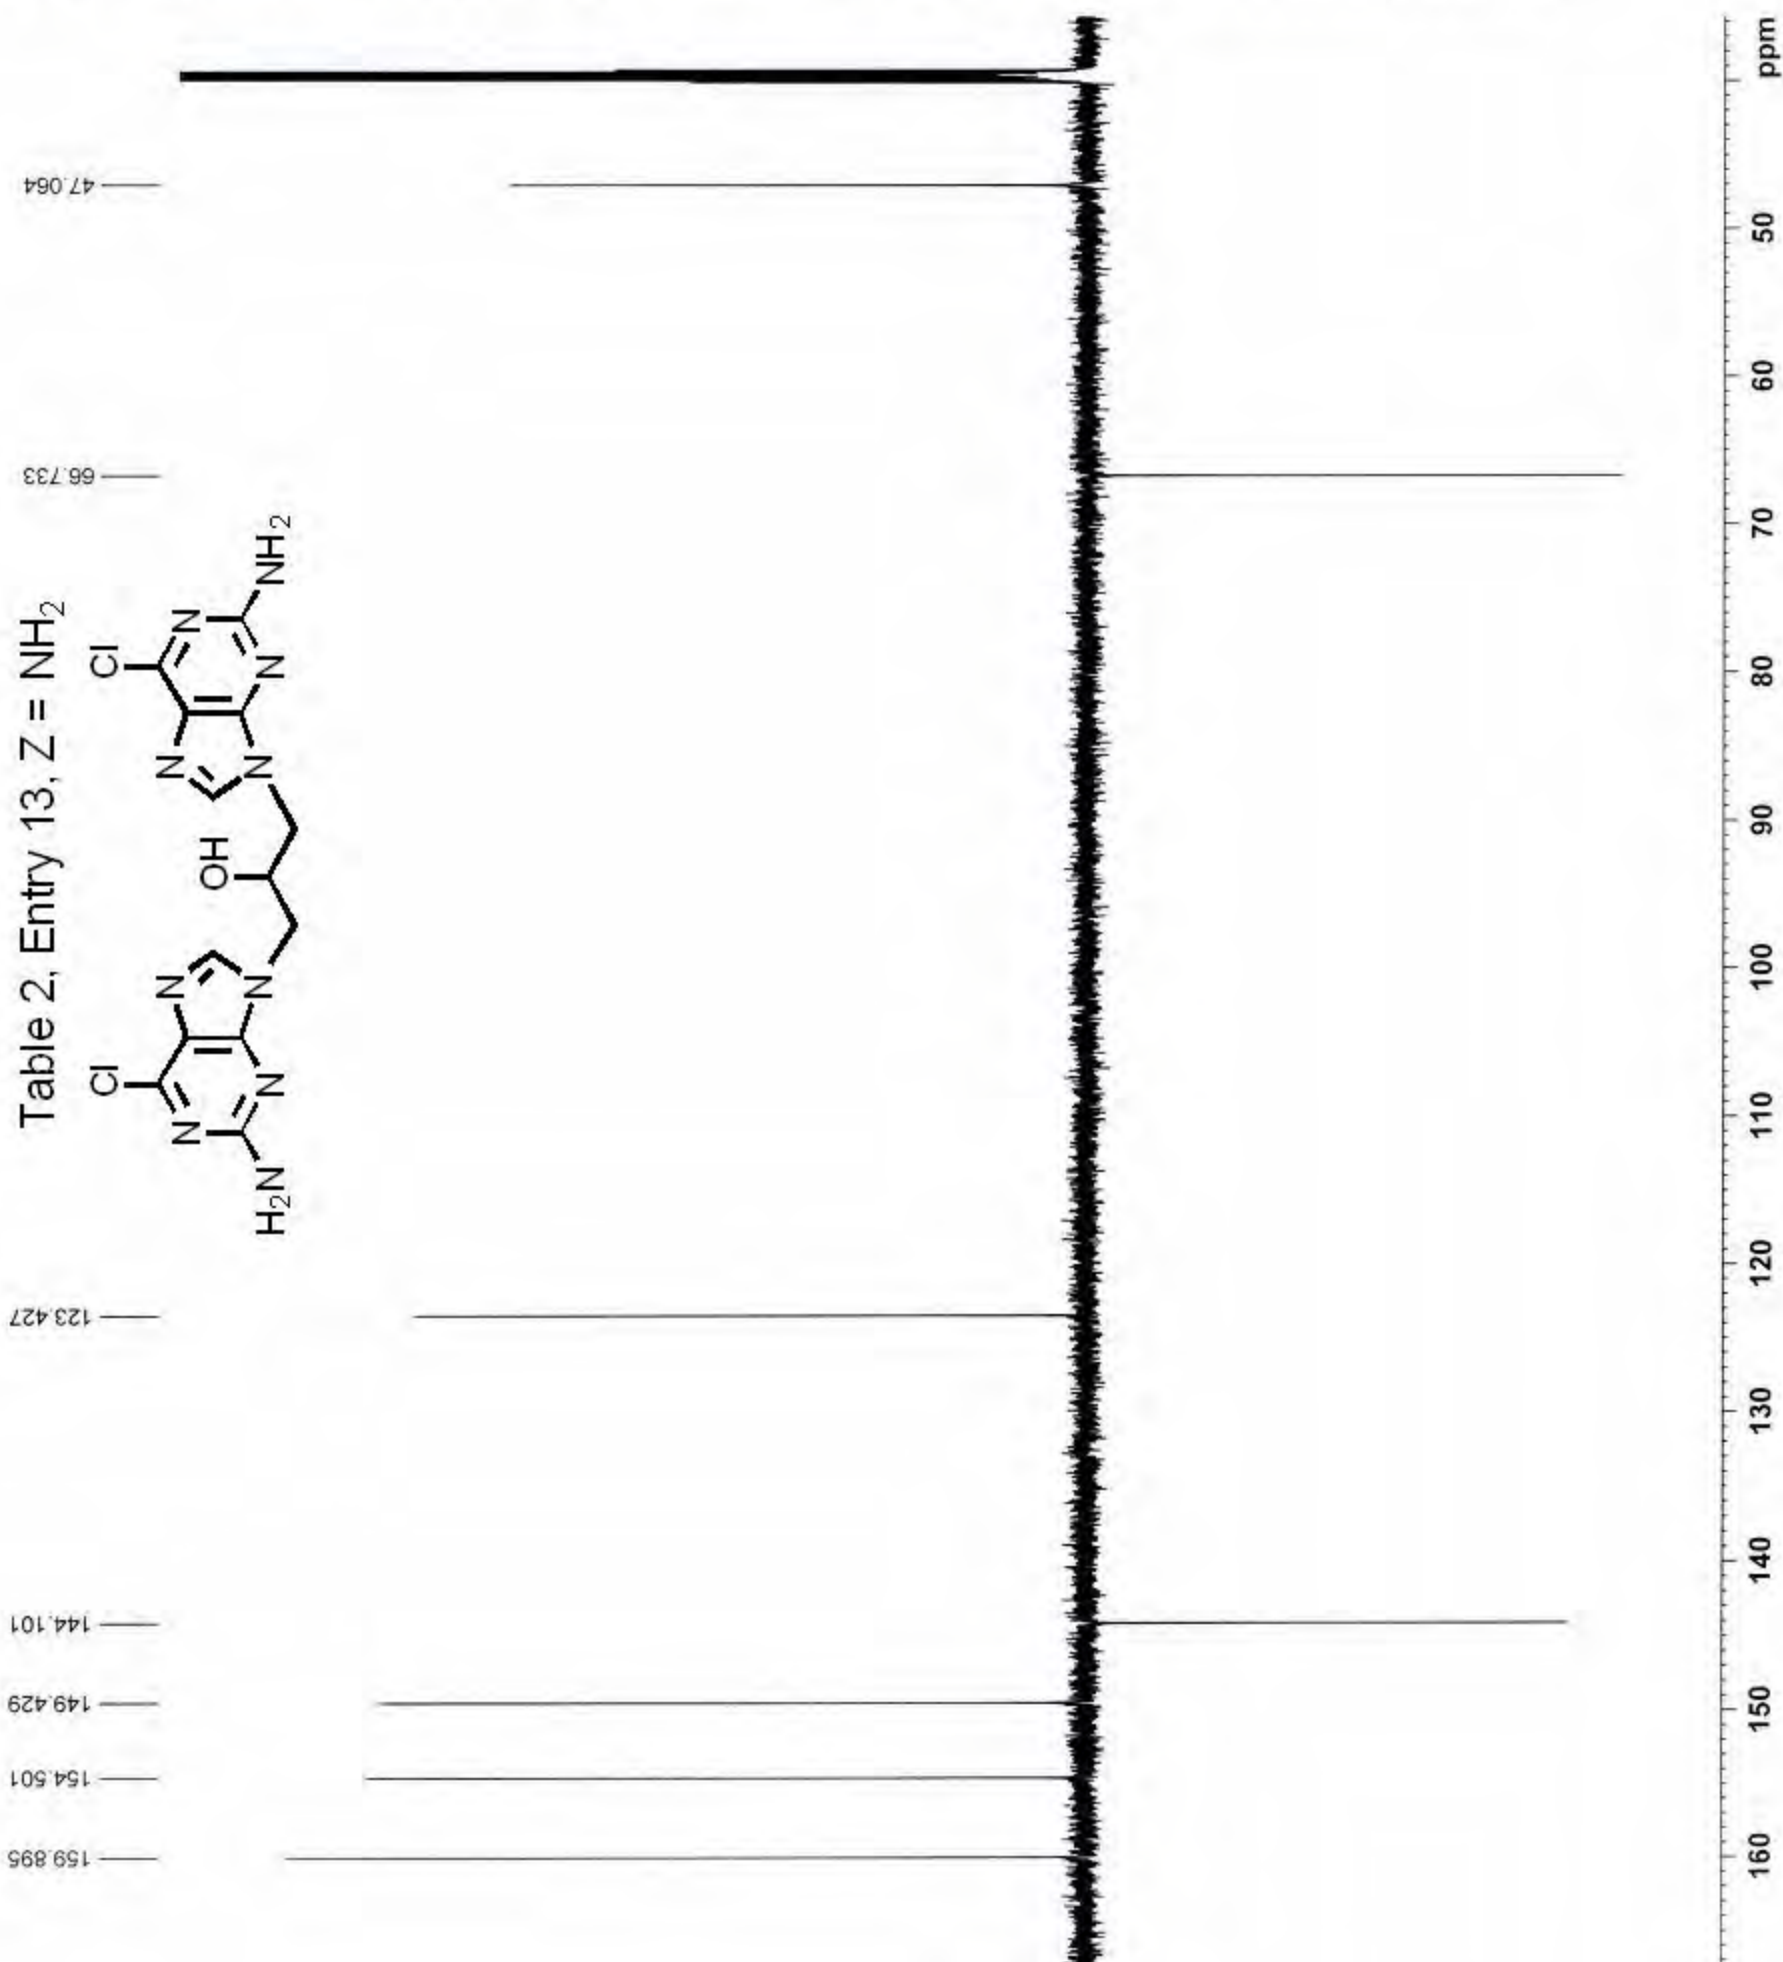

Table 2, Entry 14, Z = H

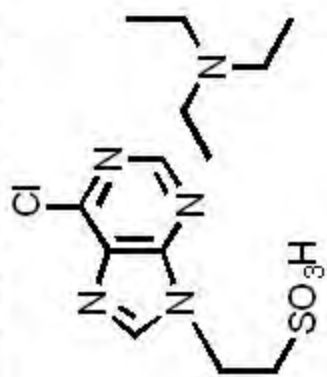

Dejmek\_MD348  
1H NMR in DMSO  
7-11-11 DR  
\*\*\*\*\*

NAME Dejmek\_MD348  
EXPNO 1  
PROCNO 1  
Date\_ 20111107  
Time\_ 10.00  
INSTRUM spect  
PROBHD 5 mm TXI 1H-  
PULPROG zg30  
TD 60094  
SOLVENT DMSO  
NS 32  
DS 0  
SWH 7507.507 Hz  
FIDRES 0.124929 Hz  
AQ 4.0023770 sec  
RG 14.3  
DW 66.600 usec  
DE 6.00 usec  
TE 300.0 K  
D1 1.00000000 sec  
TD0 1

==== CHANNEL f1 =  
NUC1 1H  
P1 8.00 usec  
PL1 0.00 dB  
PL1W 8.54041386 V  
SFO1 499.9534997 M  
SI 131072  
SF 499.9499978 MHz  
WDW no  
SSB 0  
LB 0.00 Hz  
GB 0  
PC 1.00

8.76  
8.67

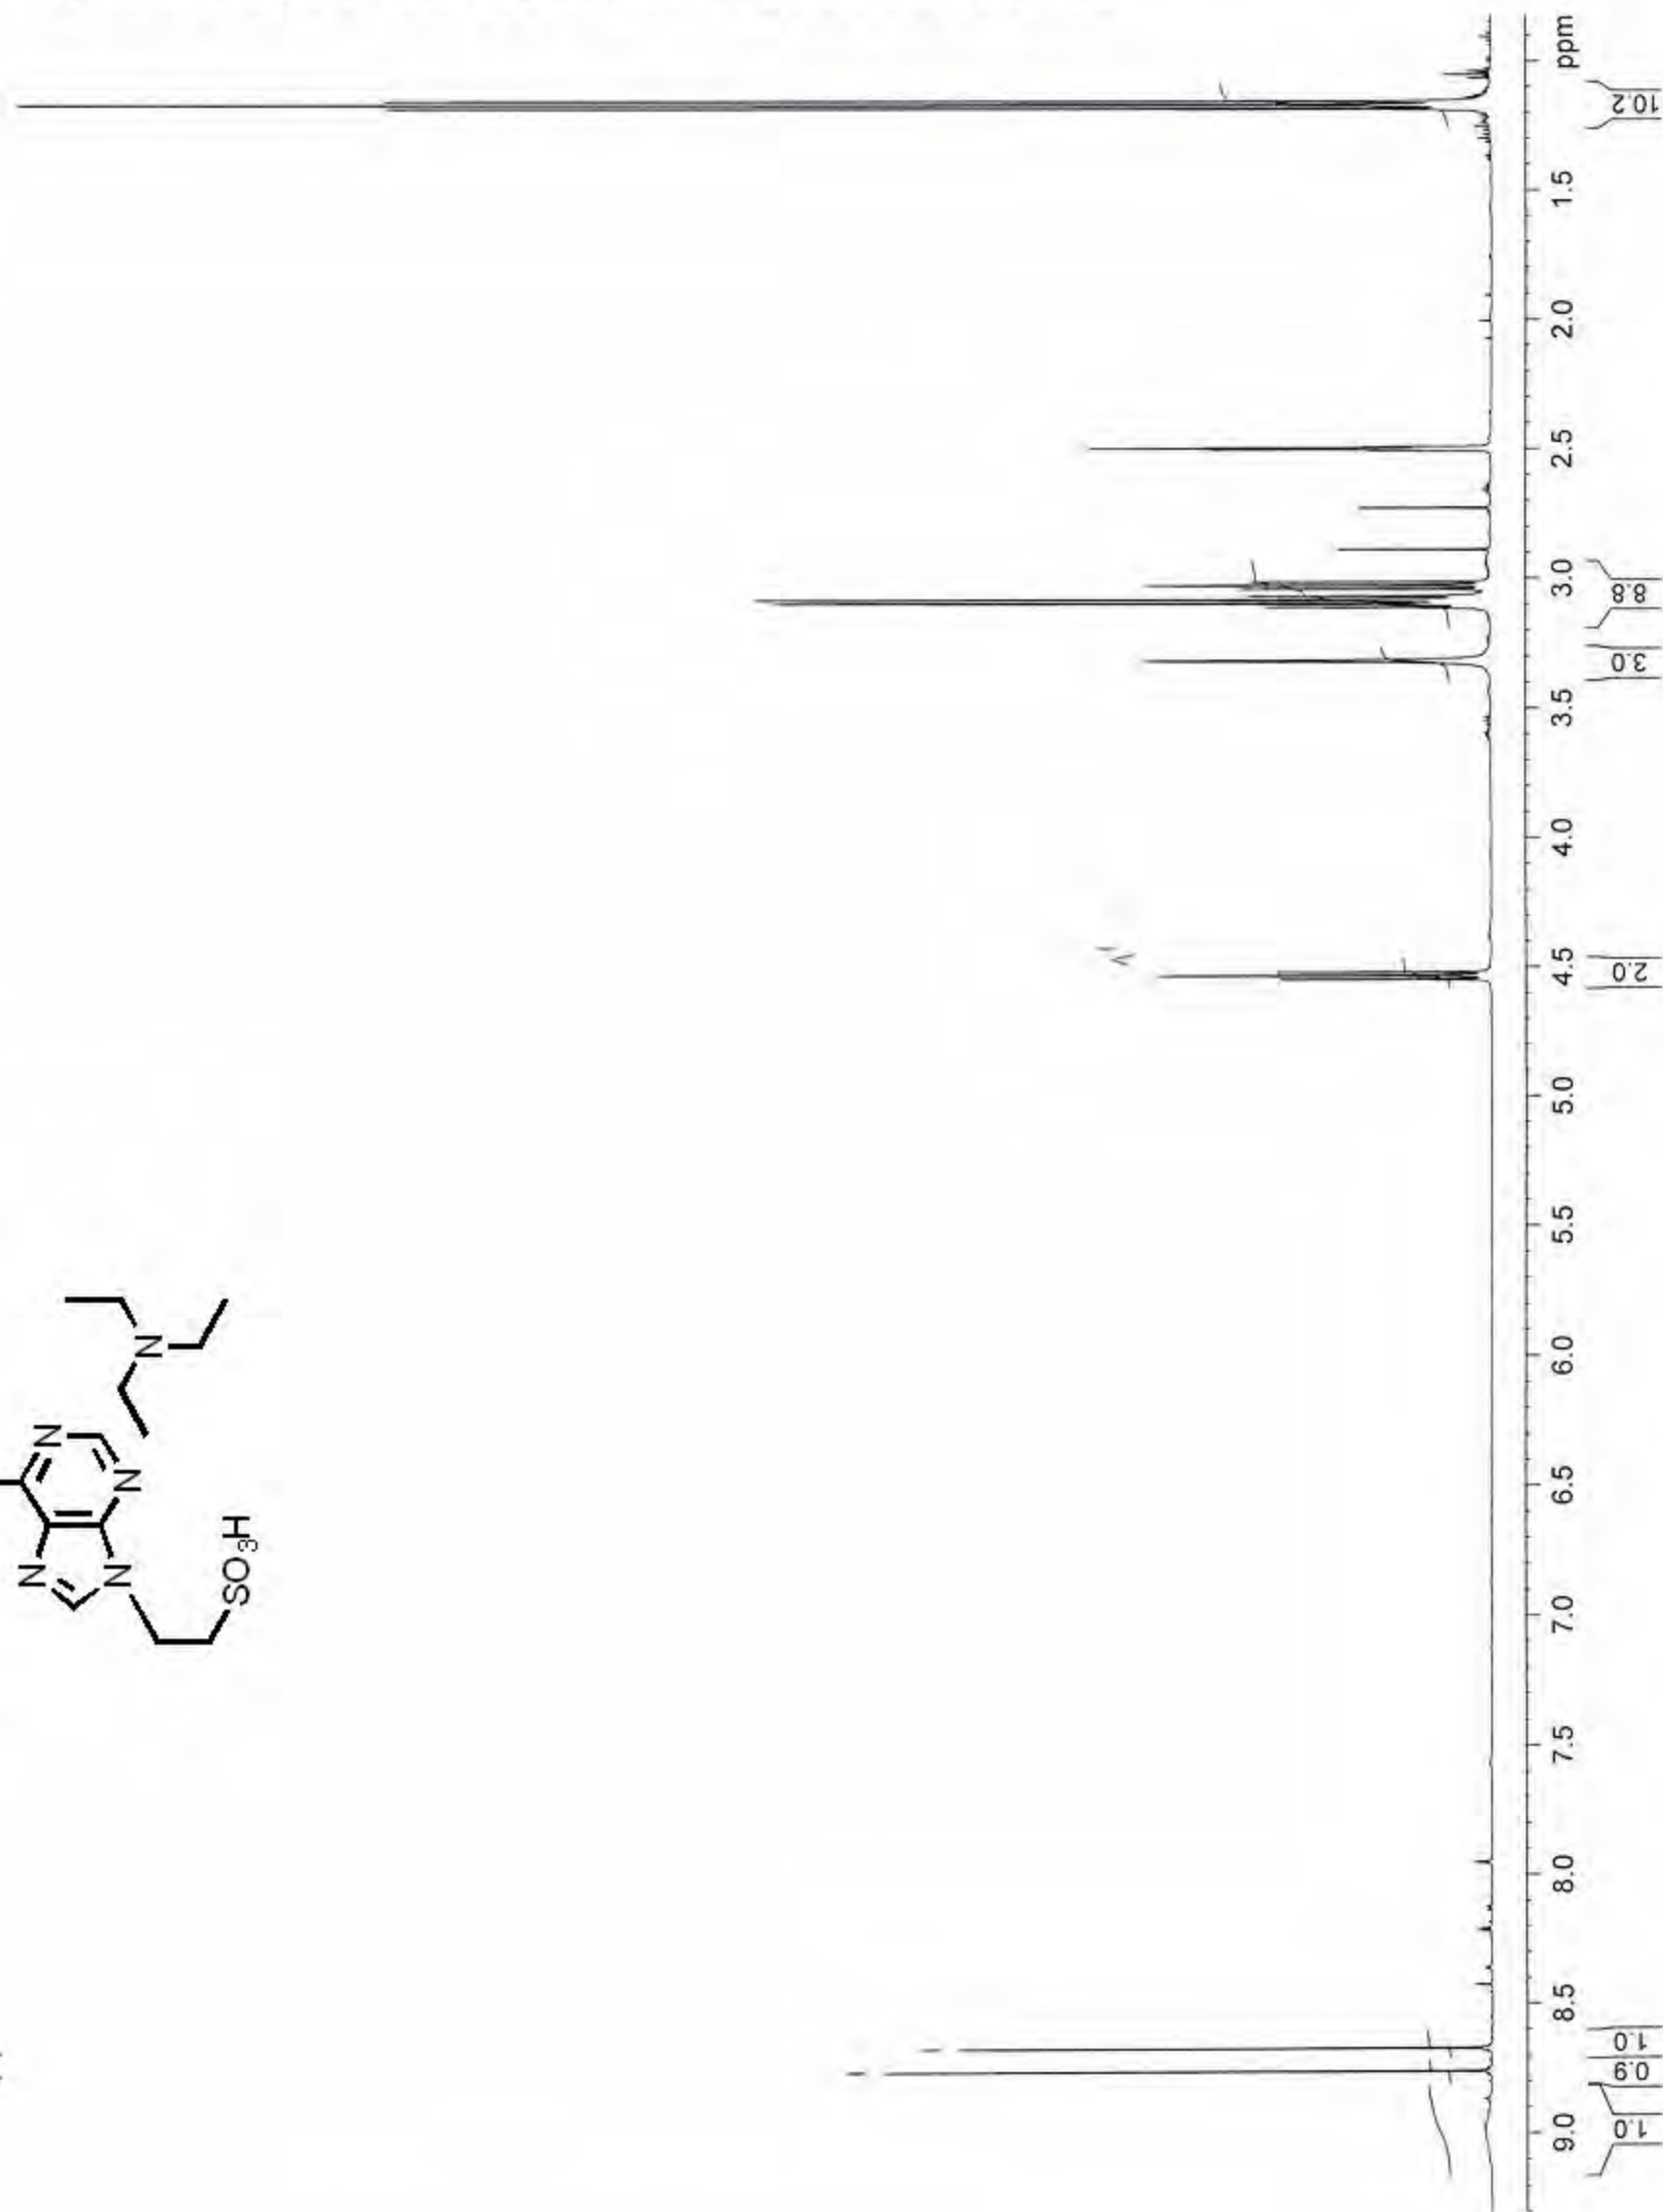

Table 2, Entry 14, Z = H

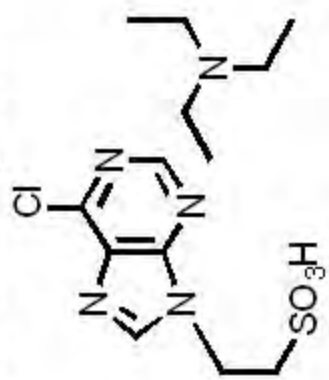

152.09  
 151.39  
 148.78  
 148.35

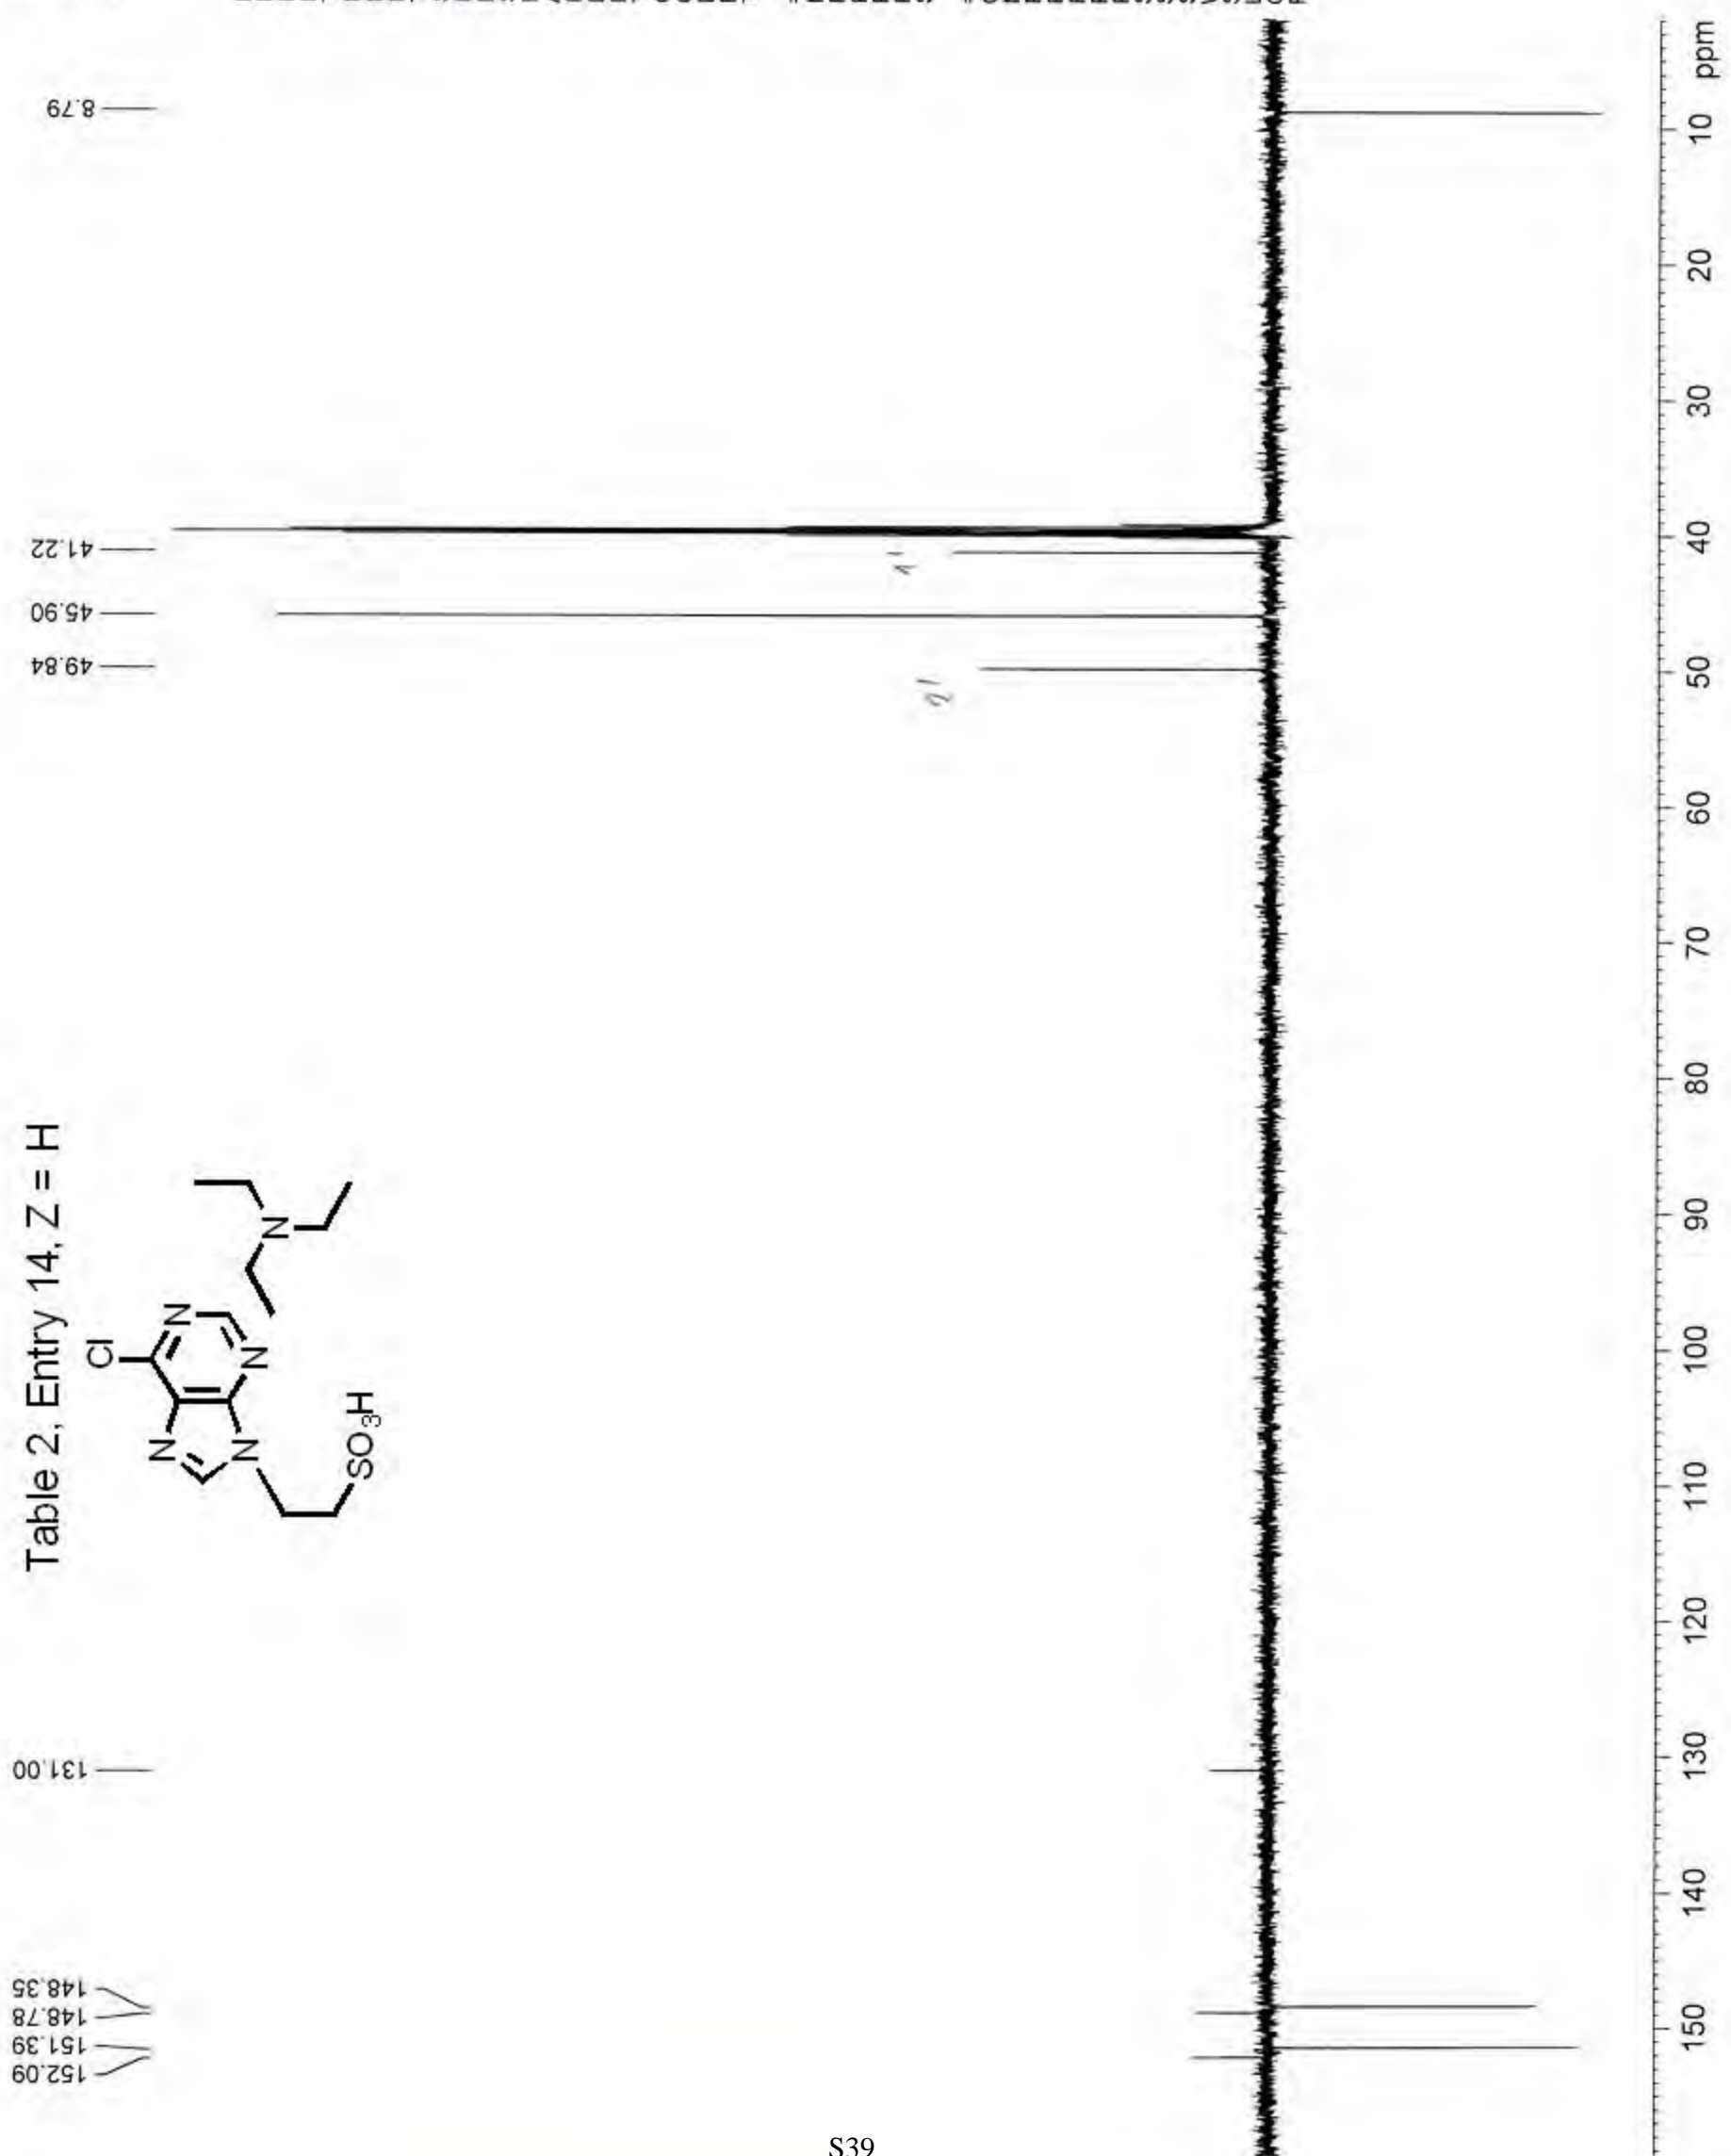

Dejmek\_MD348  
 APT in DMSO  
 7-11-11 DR  
 \*\*\*\*\*

NAME Dejmek\_MD348  
 EXPNO 2  
 PROCNO 1  
 Date\_ 20111107  
 Time 11.03  
 INSTRUM spect  
 PROBHD 5 mm TXI 1H-13  
 PULPROG jmod  
 TD 65536  
 SOLVENT DMSO  
 NS 1202  
 DS 4  
 SWH 30030.029 Hz  
 FIDRES 0.458222 Hz  
 AQ 1.0912410 sec  
 RG 29193  
 DW 16.650 usec  
 DE 6.50 usec  
 TE 300.0 K  
 CNST2 165.0000000  
 CNST11 1.0000000  
 D1 2.00000000 sec  
 D20 0.00606061 sec  
 TD0 1

==== CHANNEL f1 =====  
 NUC1 13C  
 P1 14.75 usec  
 P2 29.50 usec  
 PL1 0.00 dB  
 PL1W 67.82093048 W  
 SFO1 125.7263554 MHz  
 =====  
 CPDPRG2 waltz16  
 NUC2 1H  
 PCPD2 60.00 usec  
 PL2 0.00 dB  
 PL12 17.50 dB  
 PL2W 8.54041386 W  
 PL12W 0.15187243 W  
 SFO2 499.9519998 MHz  
 SI 131072  
 SF 125.7125648 MHz  
 WDW EM  
 SSB 0  
 LB 1.00 Hz  
 GB 0  
 PC 1.00

Table 2, Entry 14, Z = NH<sub>2</sub>

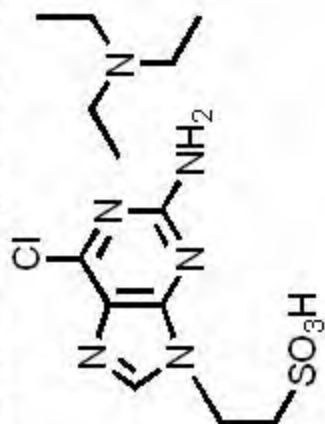

8.94  
8.12  
6.91

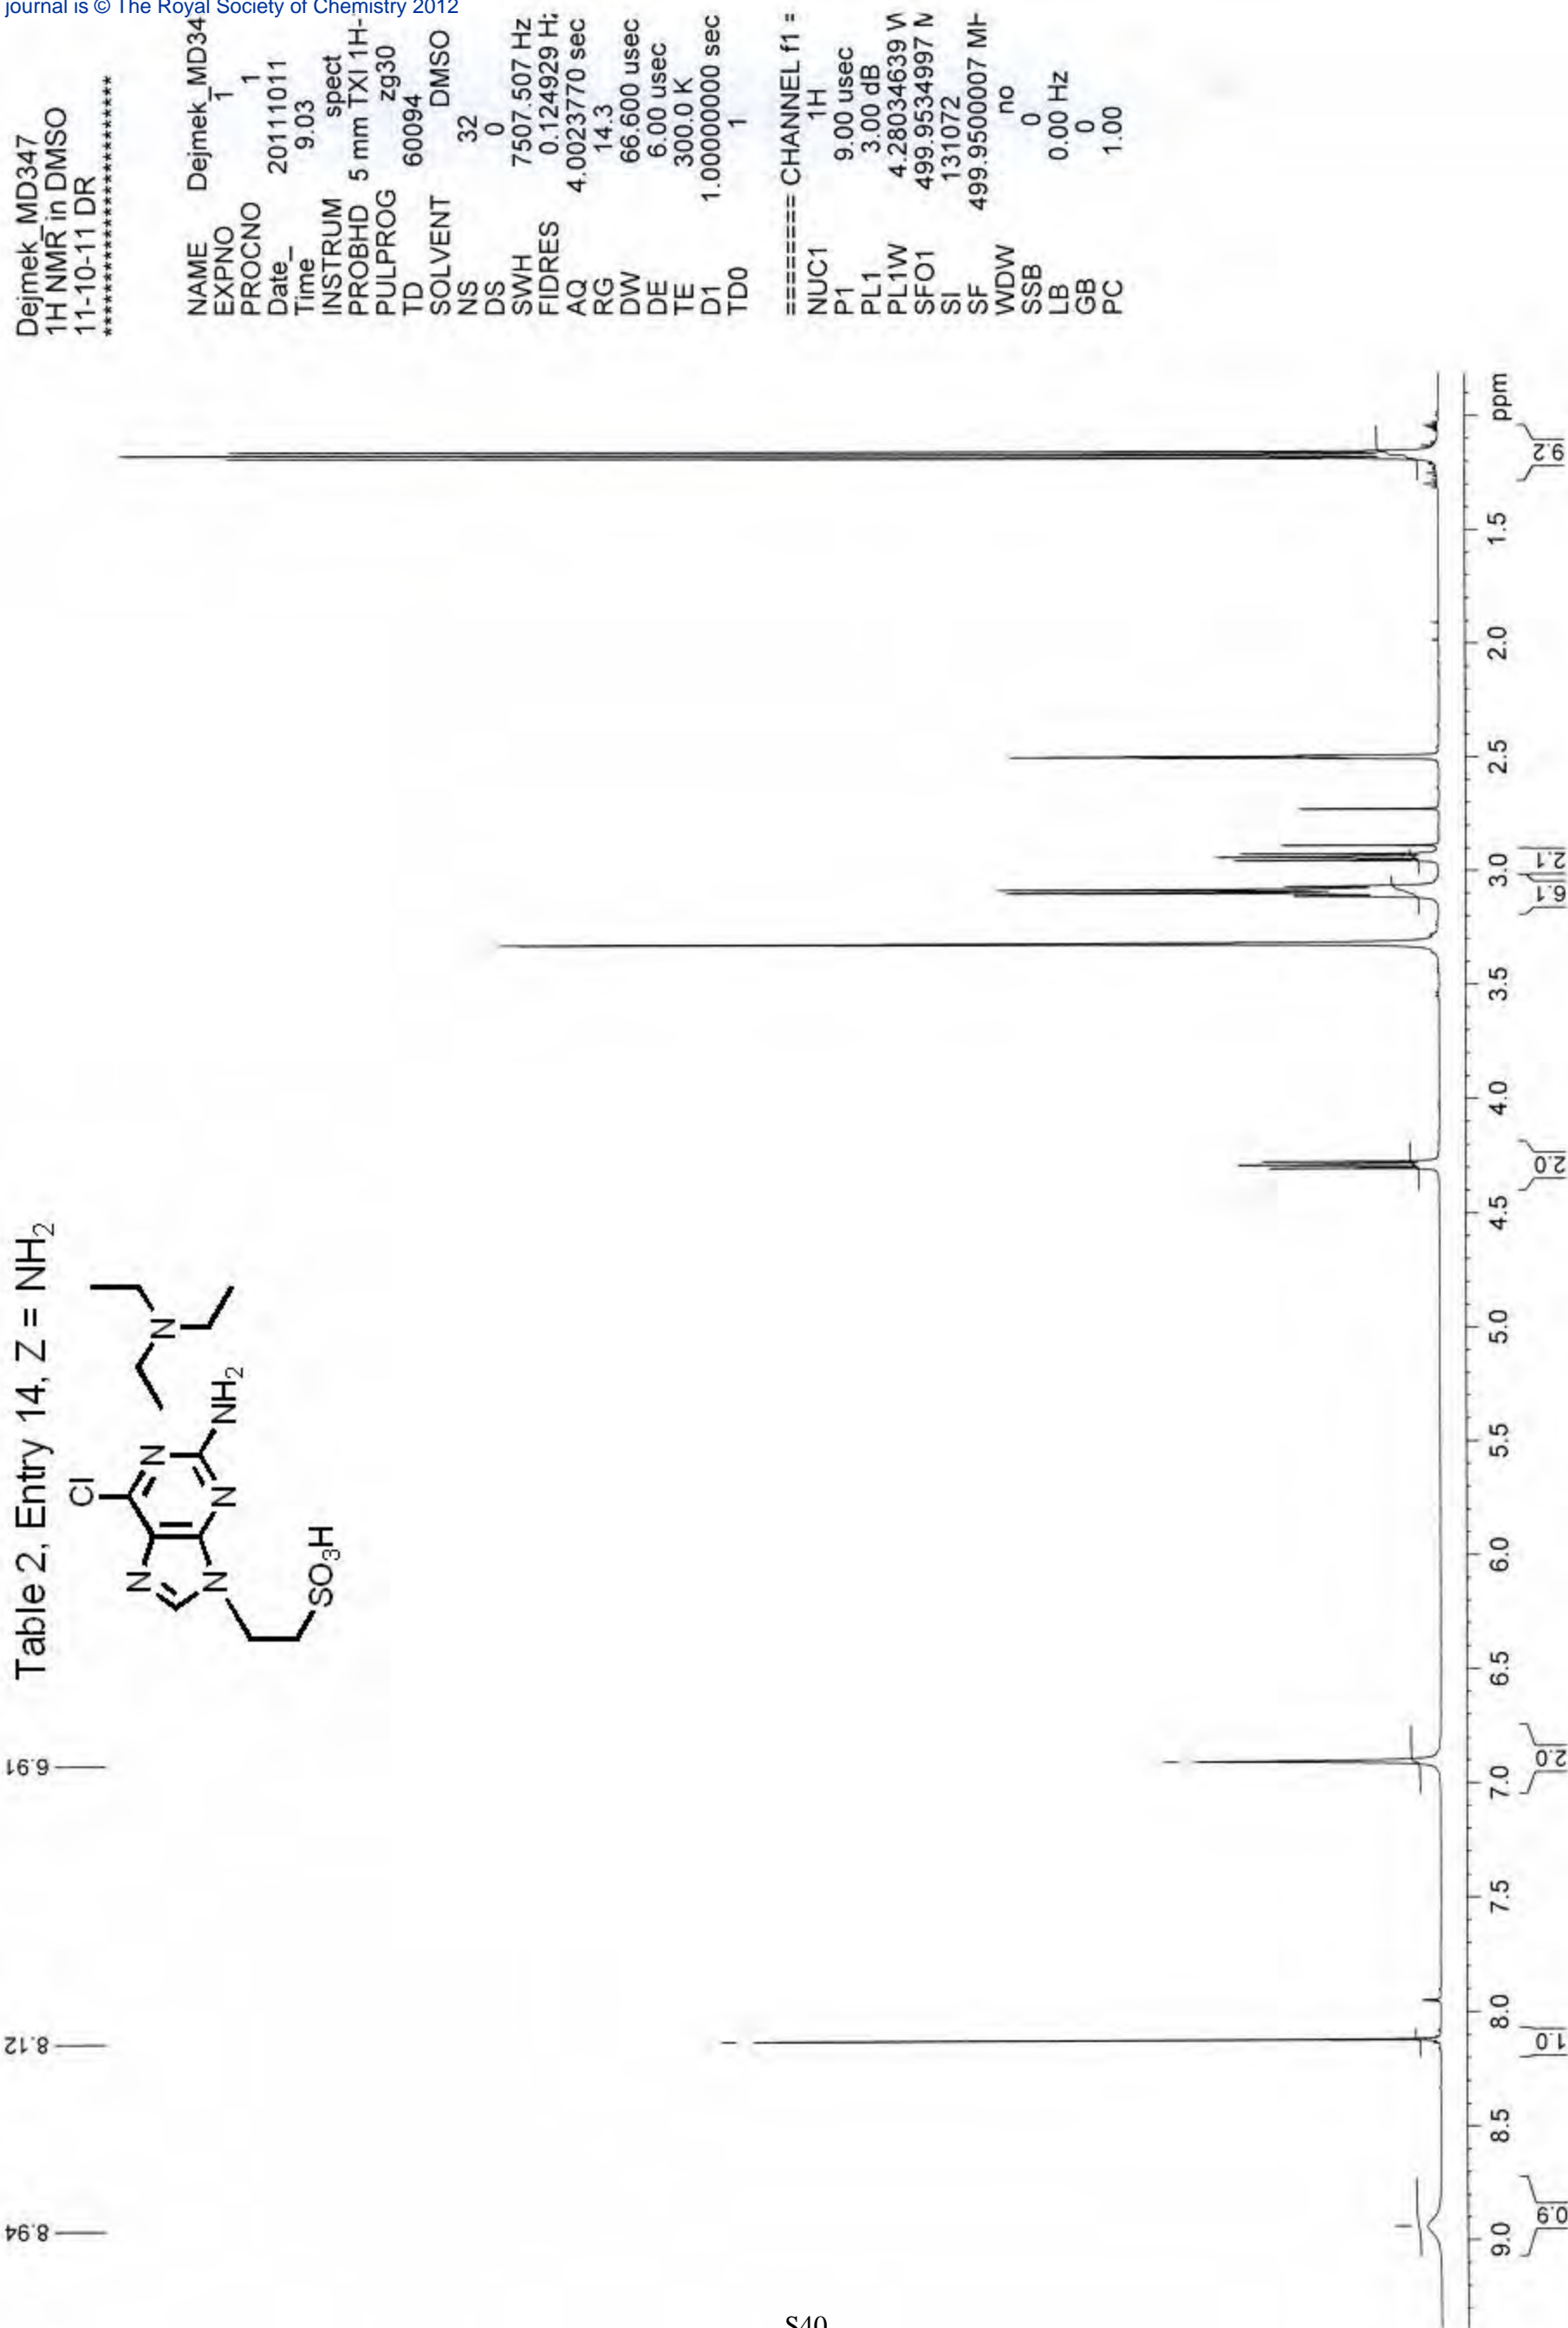



Table 2, Entry 14, Z = NH<sub>2</sub>

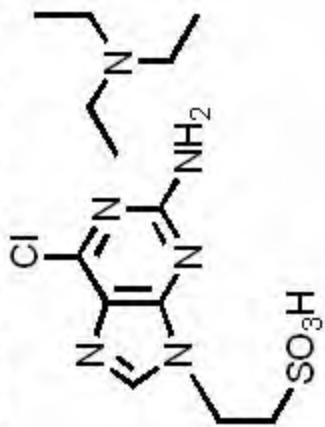

Dejmek\_MD347  
APT in DMSO  
11-10-11 DR  
\*\*\*\*\*

NAME Dejmek\_MD347  
EXPNO 2  
PROCNO 1  
Date\_ 20111011  
Time\_ 9.30  
INSTRUM spect  
PROBHD 5 mm TXI 1H-13  
PULPROG jmod  
TD 65536  
SOLVENT DMSO  
NS 1066  
DS 4  
SWH 30030.029 Hz  
FIDRES 0.458222 Hz  
AQ 1.0912410 sec  
RG 29193  
DW 16.650 usec  
DE 6.50 usec  
TE 300.0 K  
CNST2 165.000000  
CNST11 1.000000  
D1 2.0000000 sec  
D20 0.00606061 sec  
TD0 1

==== CHANNEL f1 =====  
NUC1 13C  
P1 14.50 usec  
P2 29.00 usec  
PL1 0.00 dB  
PL1W 67.82093048 W  
SFO1 125.7263554 MHz

==== CHANNEL f2 =====  
CPDPRG2 waltz16  
NUC2 1H  
PCPD2 60.00 usec  
PL2 3.00 dB  
PL12 19.48 dB  
PL2W 4.28034639 W  
PL12W 0.09626734 W  
SFO2 499.9519998 MHz  
SI 131072  
SF 125.7125653 MHz  
WDFW EM  
SSB 0  
LB 1.00 Hz  
GB 0  
PC 1.00

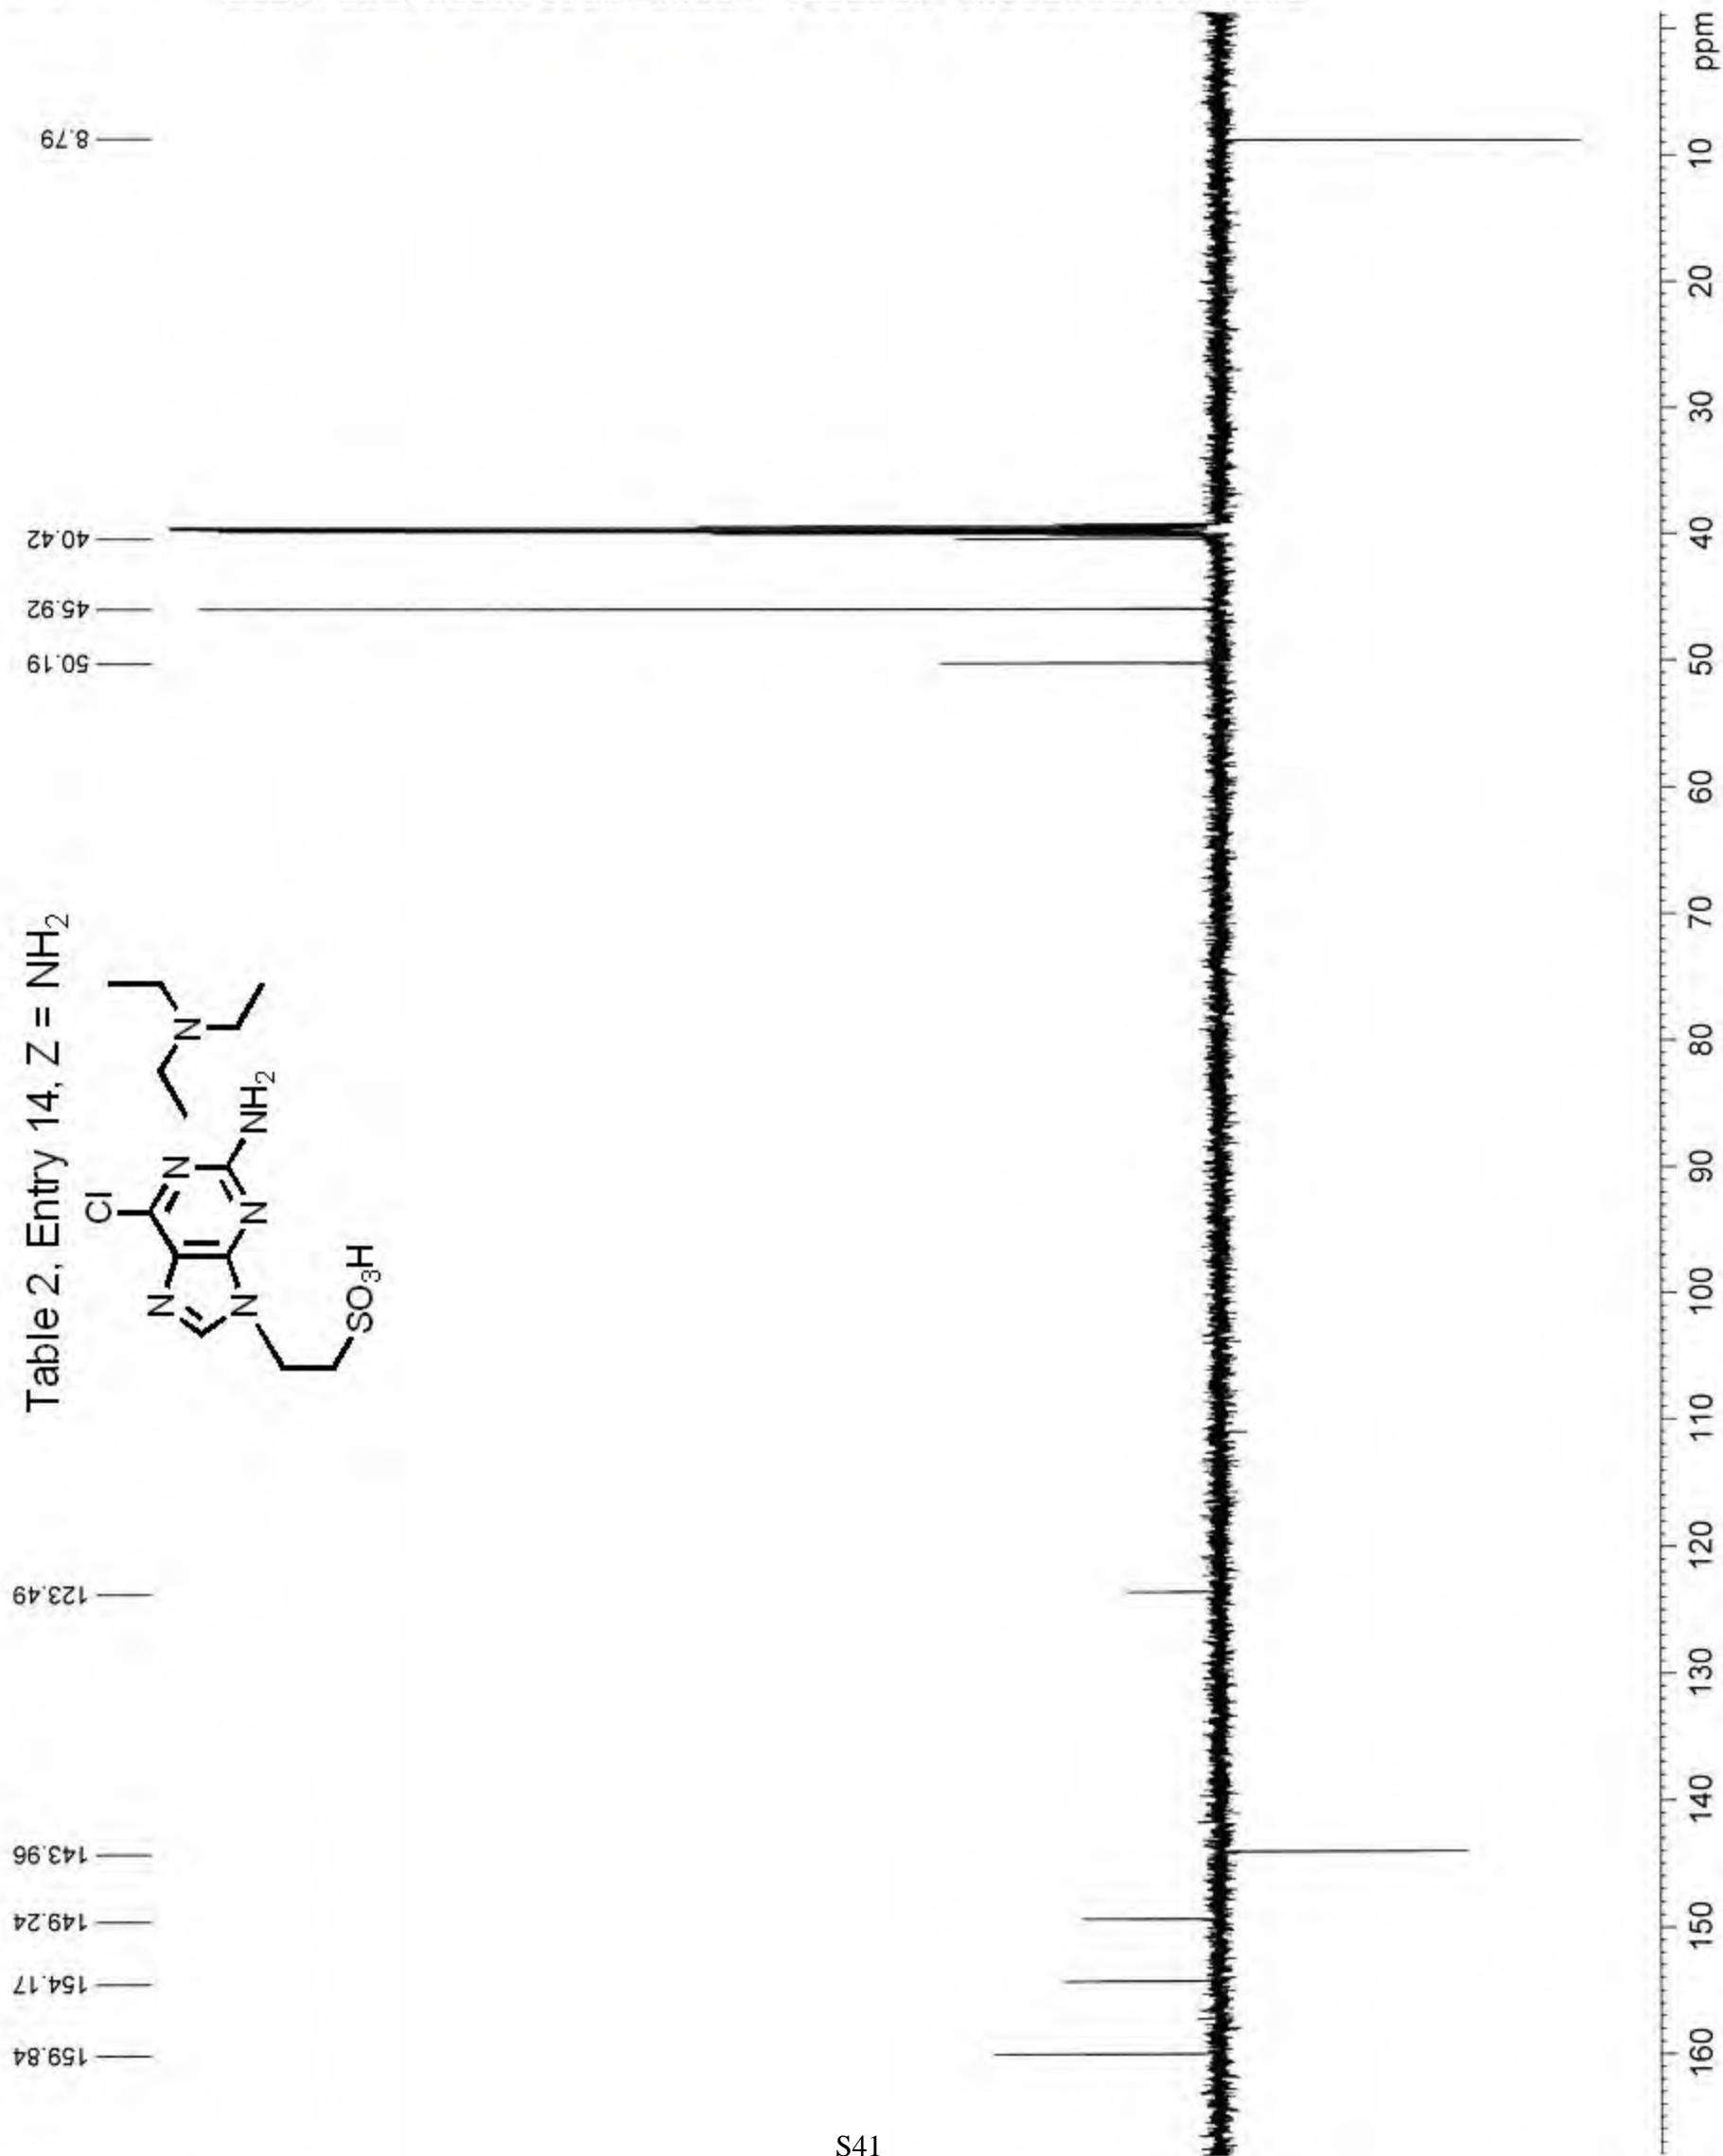

Table 2, Entry 15, Z = H

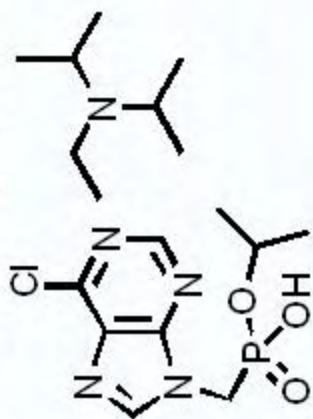

9.96  
9.96  
9.96  
9.96  
9.96  
9.96  
8.76  
8.67

Dejmek\_MD338  
 1H NMR in DMSO  
 15-9-11 DR  
 \*\*\*\*\*

Current Data Parameters  
 NAME Dejmek\_MD338  
 EXPNO 1  
 PROCNO 1  
 F2 - Acquisition Parameters  
 Date\_ 20110915  
 Time\_ 19.18  
 INSTRUM spect  
 PROBHD 5 mm TBO BB-1H  
 PULPROG zg30  
 TD 48856  
 SOLVENT DMSO  
 NS 32  
 DS 0  
 SWH 7500.000 Hz  
 FIDRES 0.167202 Hz  
 AQ 2.950499 sec  
 RG 36  
 DW 66.667 usec  
 DE 20.00 usec  
 TE 298.2 K  
 DI 0.00000000 sec  
 TDO 1  
 CHANNEL f1  
 NUC1 1H  
 P1 11.68 usec  
 PL1 -2.00 dB  
 PL1W 31.84857368 W  
 SFO1 499.8424525 MHz  
 F2 - Processing Parameters  
 SI 131072  
 SF 499.8400042 MHz  
 MDW no  
 SSB 0  
 LB 0.00 Hz  
 GB 0  
 PC 0.50

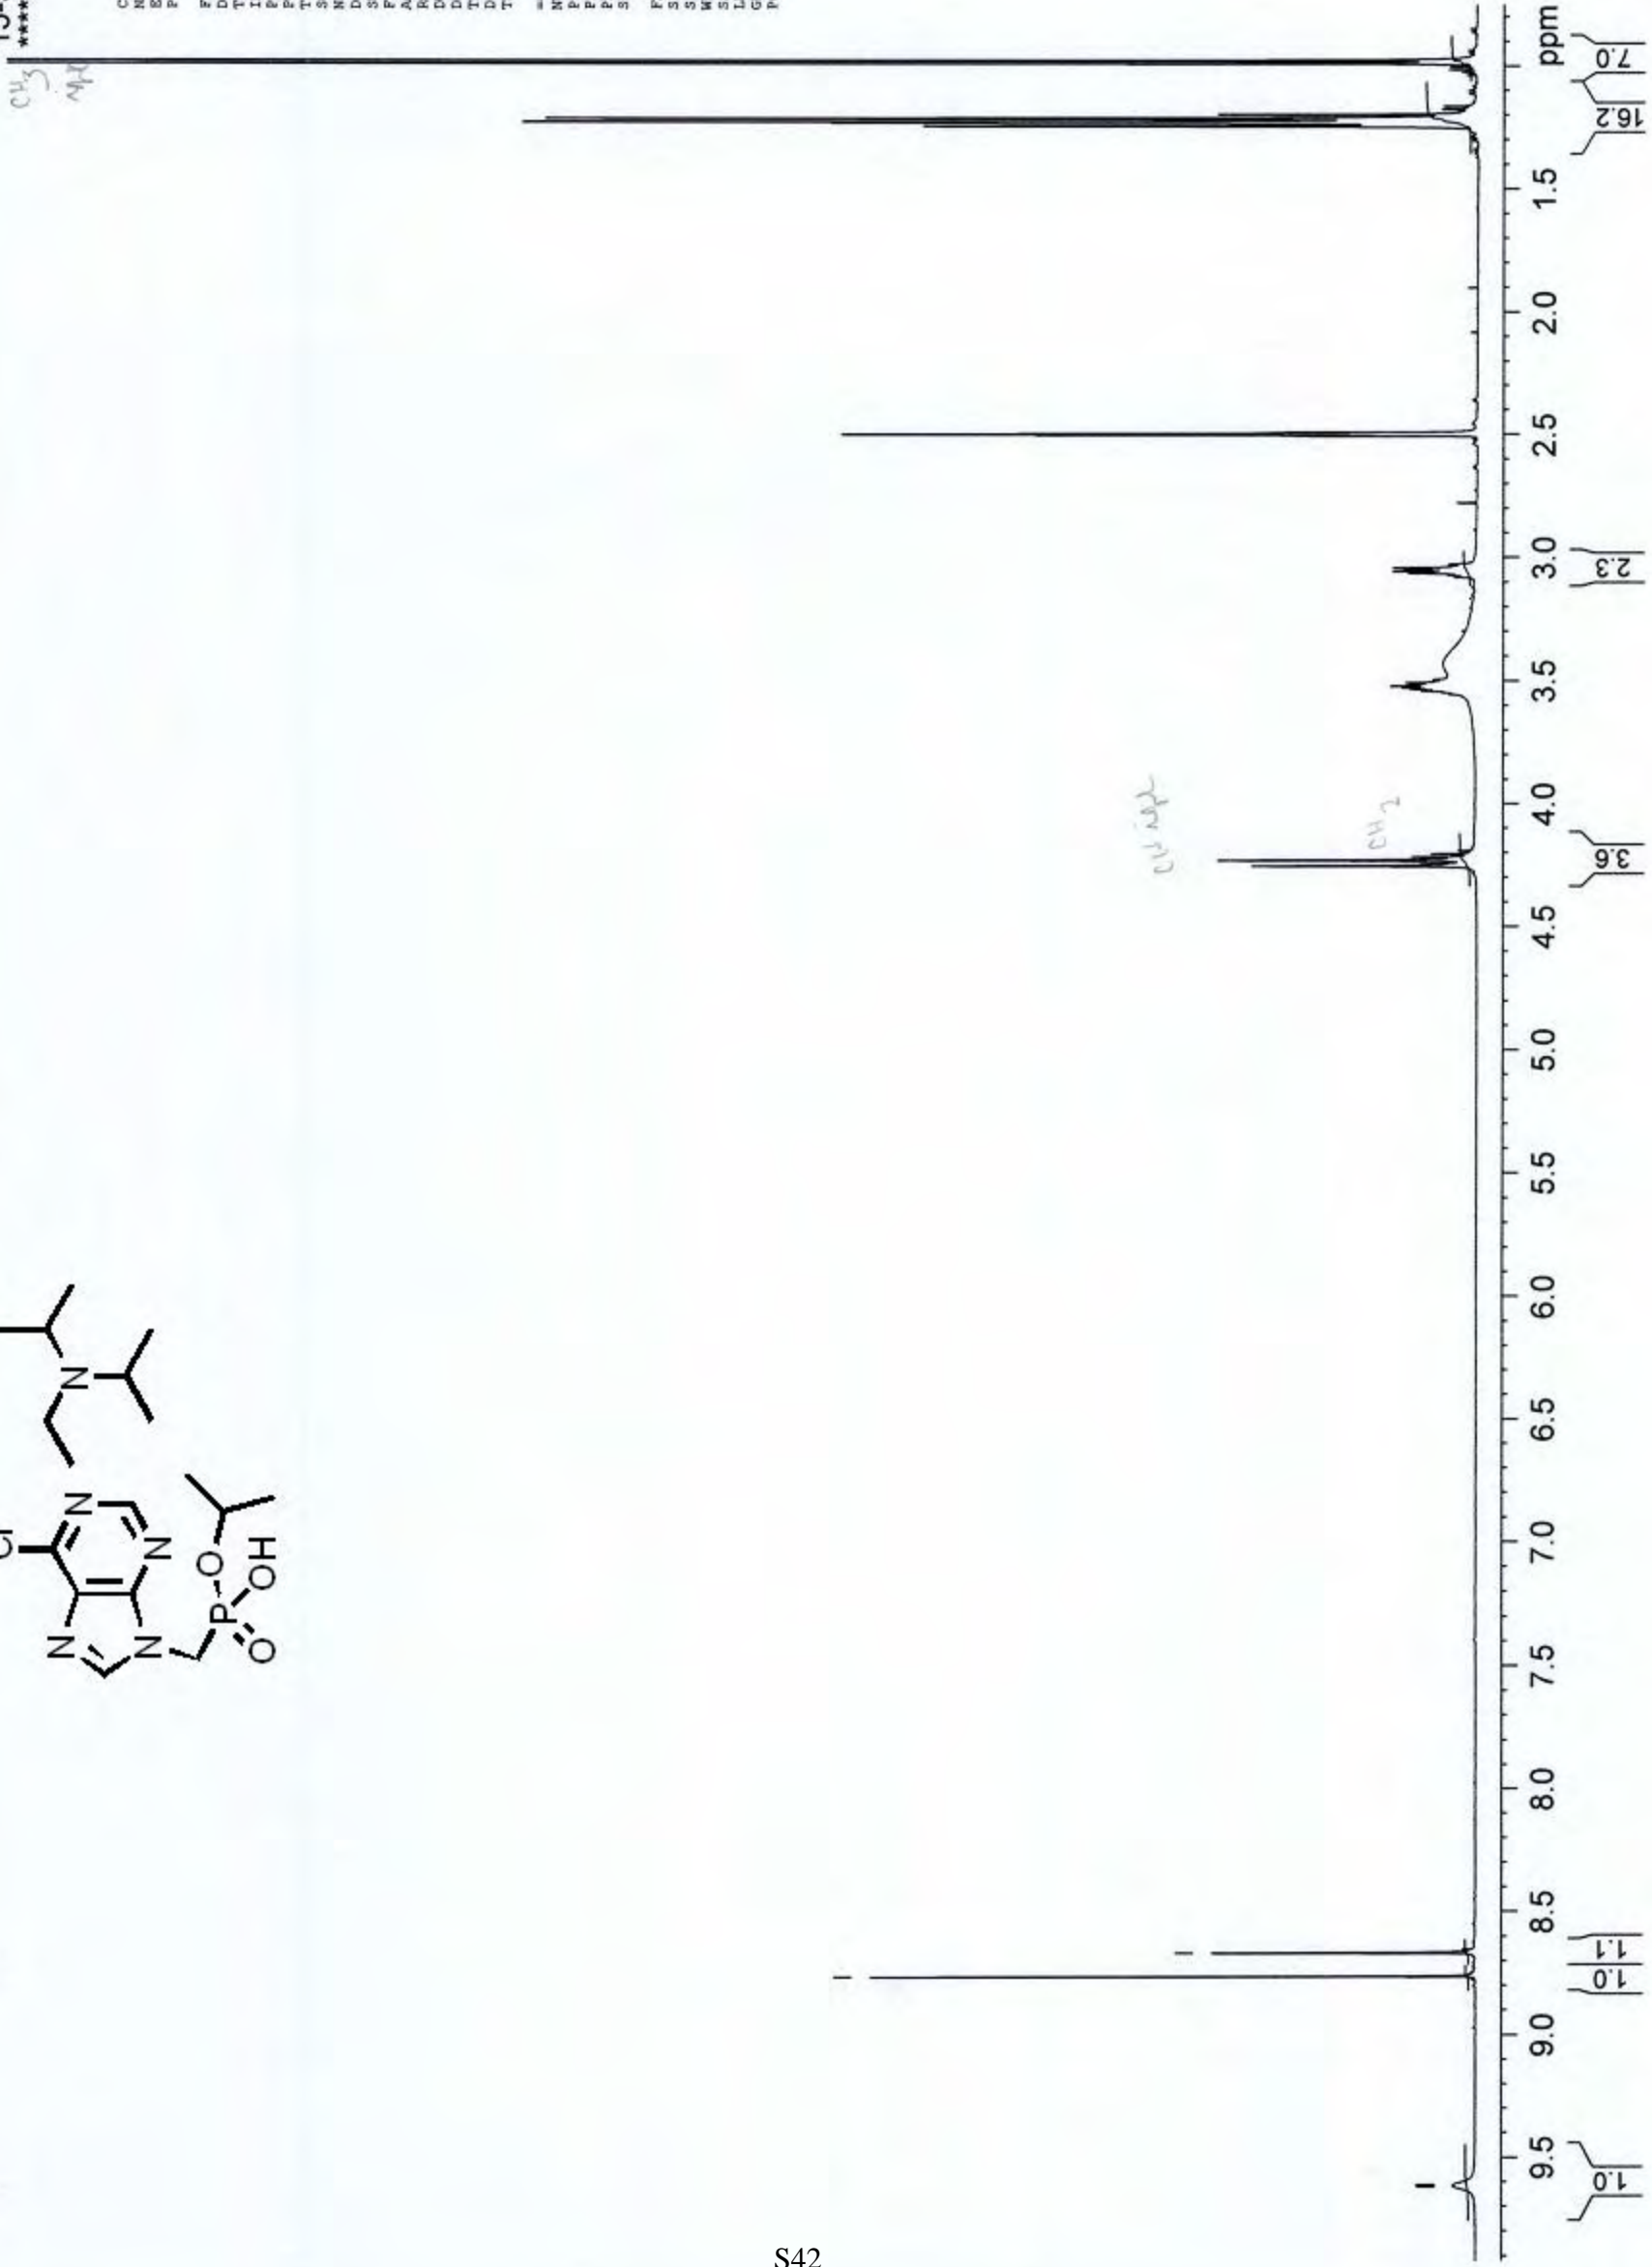

Table 2, Entry 15, Z = H

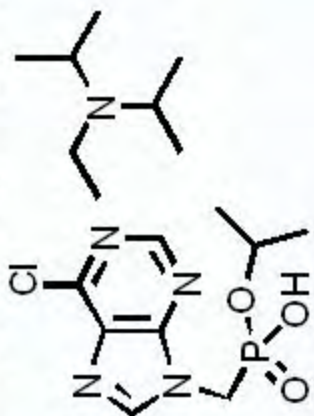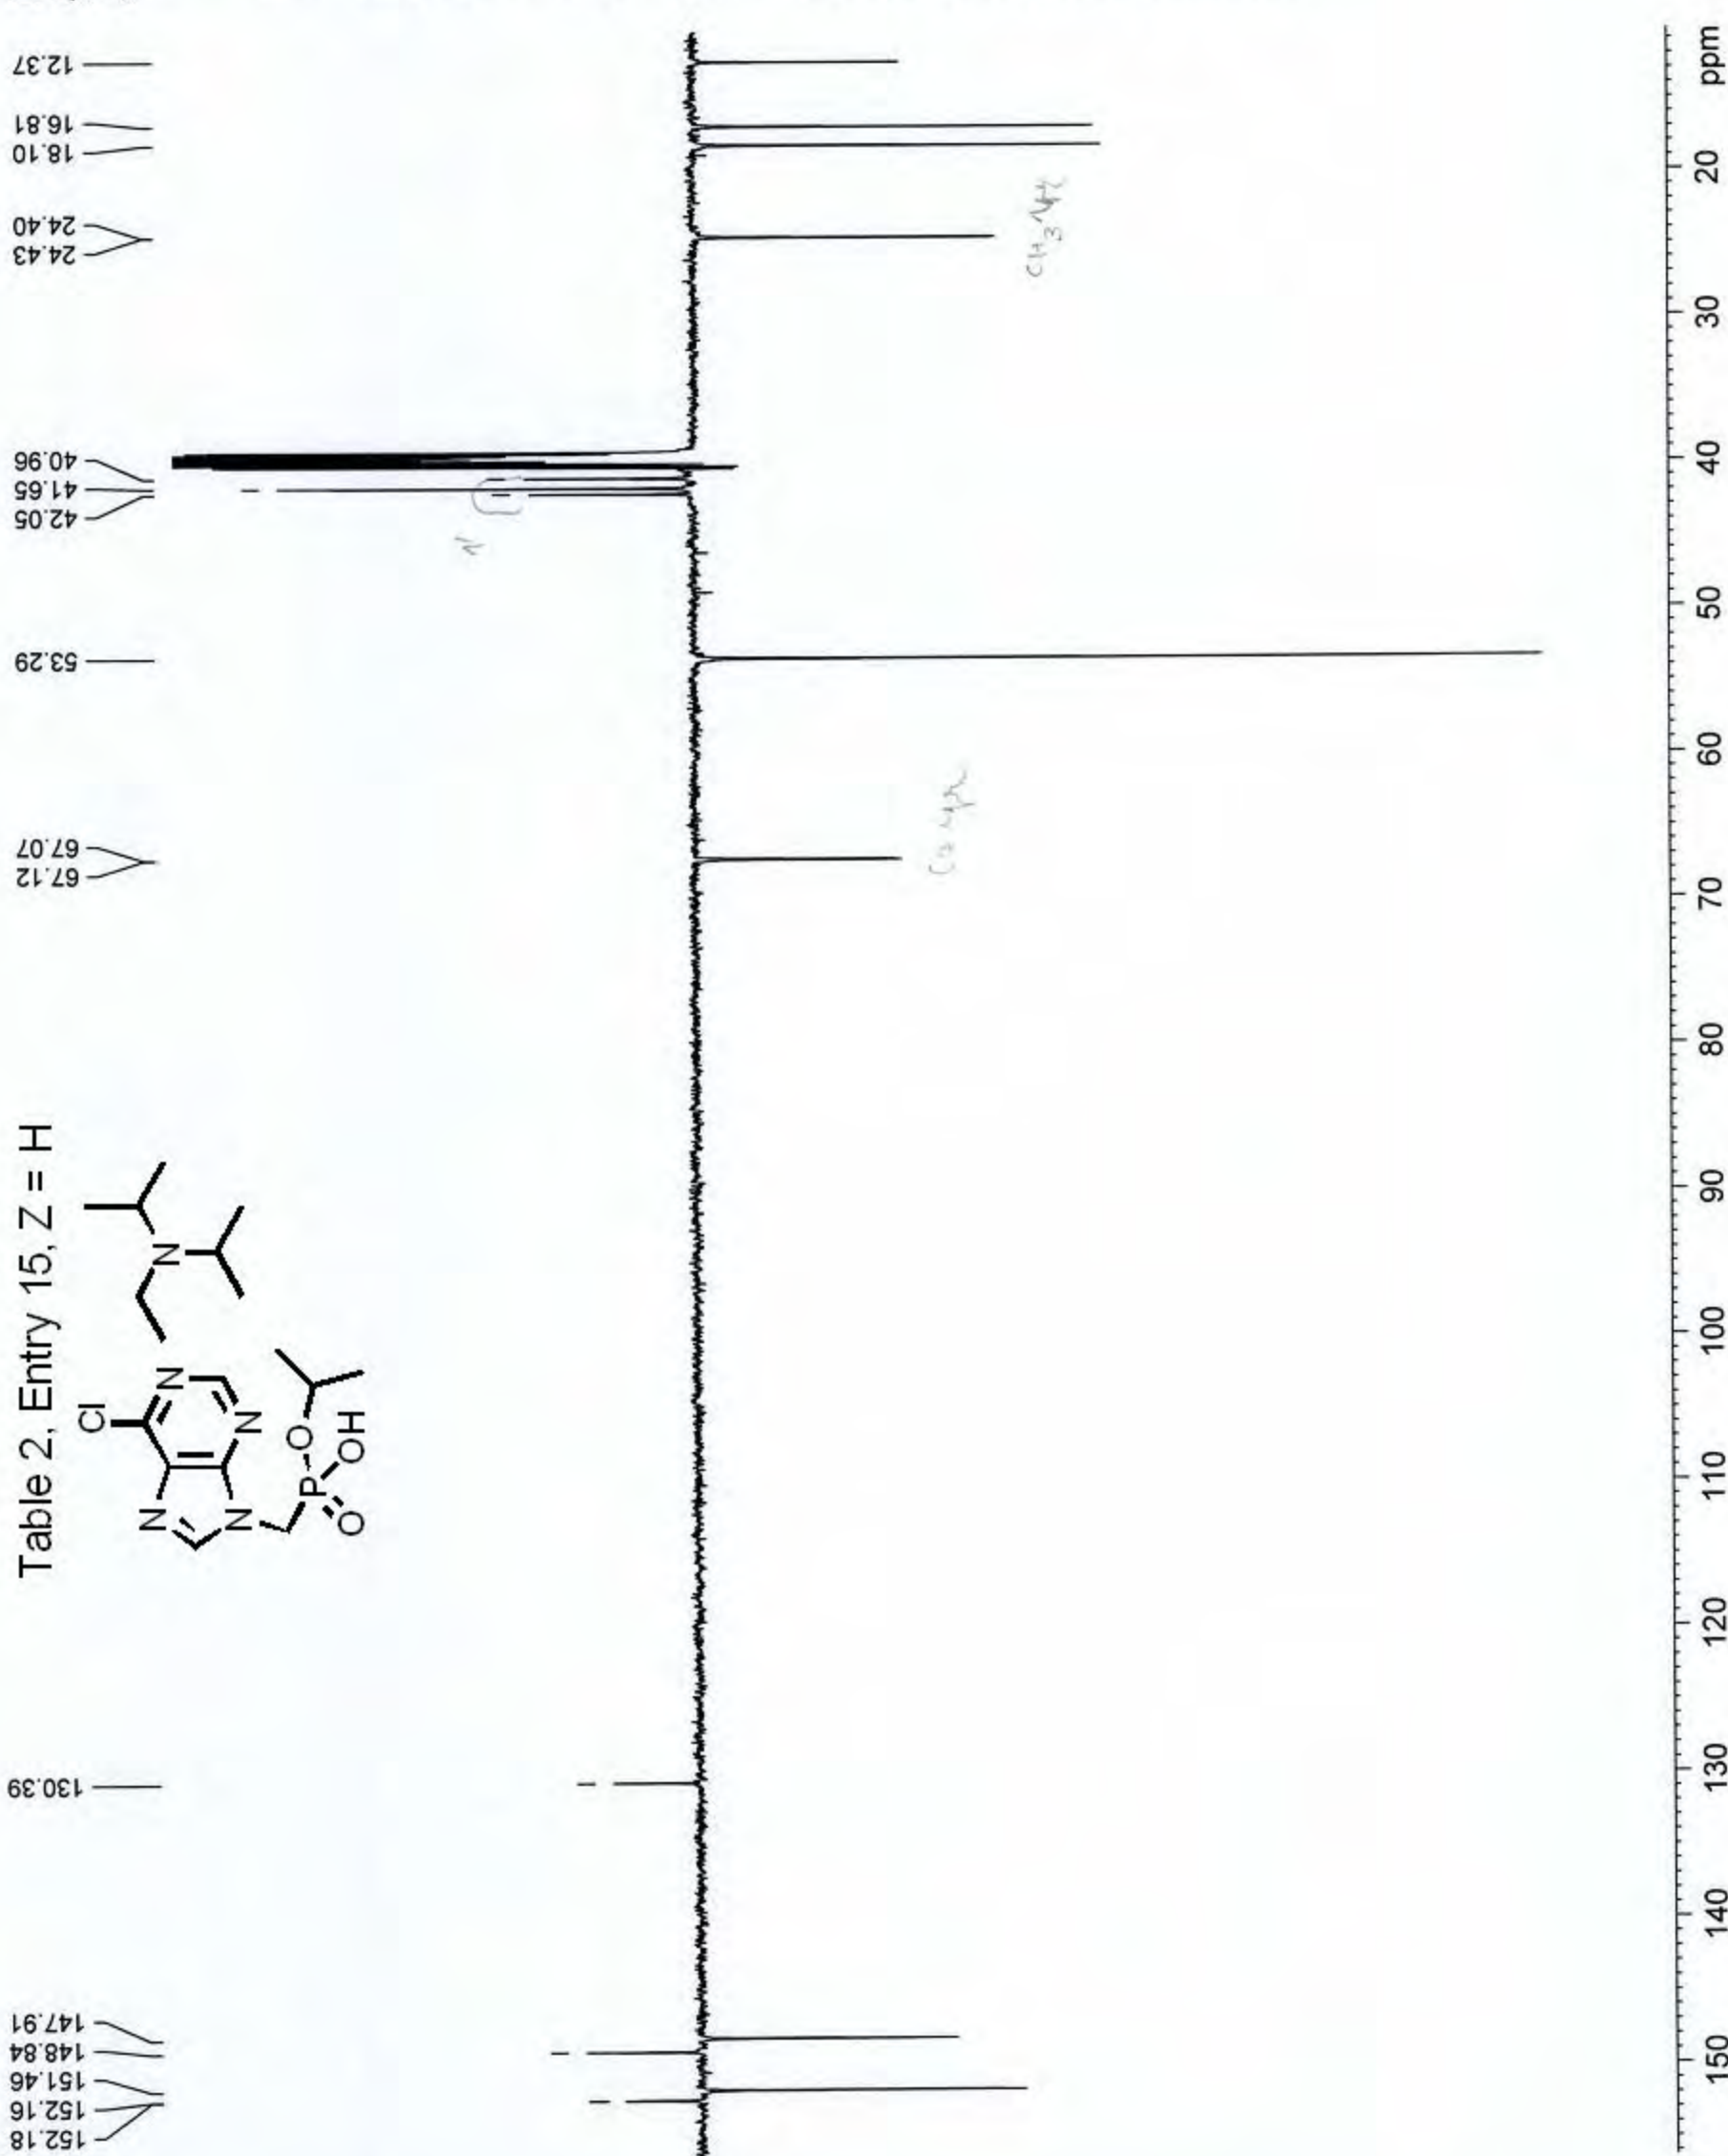

Dejmek\_MD338  
APT in DMSO  
15-9-11 DR  
\*\*\*\*\*

Current Data Parameters  
NAME Dejmek\_MD338  
EXPNO 2  
PROCNO 1  
F2 - Acquisition Parameters  
Date\_ 20110915  
Time 19.30  
INSTRUM spect  
PROBHD 5 mm TBO BB-1H  
PULPROG jmod  
TD 65536  
SOLVENT DMSO  
NS 10240  
DS 4  
SWH 29761.904 Hz  
FIDRES 0.454131 Hz  
AQ 1.1010548 sec  
RG 2050  
DW 16.800 usec  
DE 6.00 usec  
TE 298.2 K  
CNST2 165.0000000  
CNST11 1.0000000  
D1 2.0000000 sec  
D20 0.00606061 sec  
TD0 1  
===== CHANNEL f1 =====  
NUC1 13C  
P1 8.00 usec  
P2 16.00 usec  
PL1 -0.30 dB  
PL1W 104.96985626 W  
SFO1 125.6974365 MHz  
===== CHANNEL f2 =====  
CPDPRG2 waltz16  
NUC2 1H  
PCPD2 80.00 usec  
PL2 -2.00 dB  
PL12 14.71 dB  
PL2W 31.84857368 W  
PL12W 0.67934436 W  
SFO2 499.8419994 MHz  
F2 - Processing parameters  
SI 131072  
SF 125.6849030 MHz  
WDW EM  
SSB 0  
LB 3.00 Hz  
GB 0  
PC 0.50

Table 2, Entry 15, Z = NH<sub>2</sub>

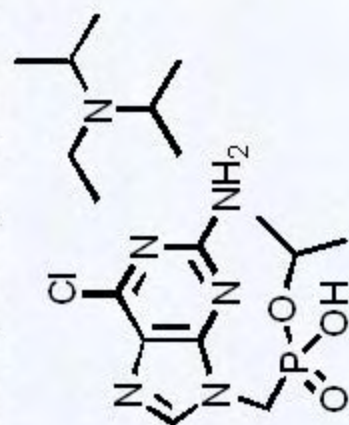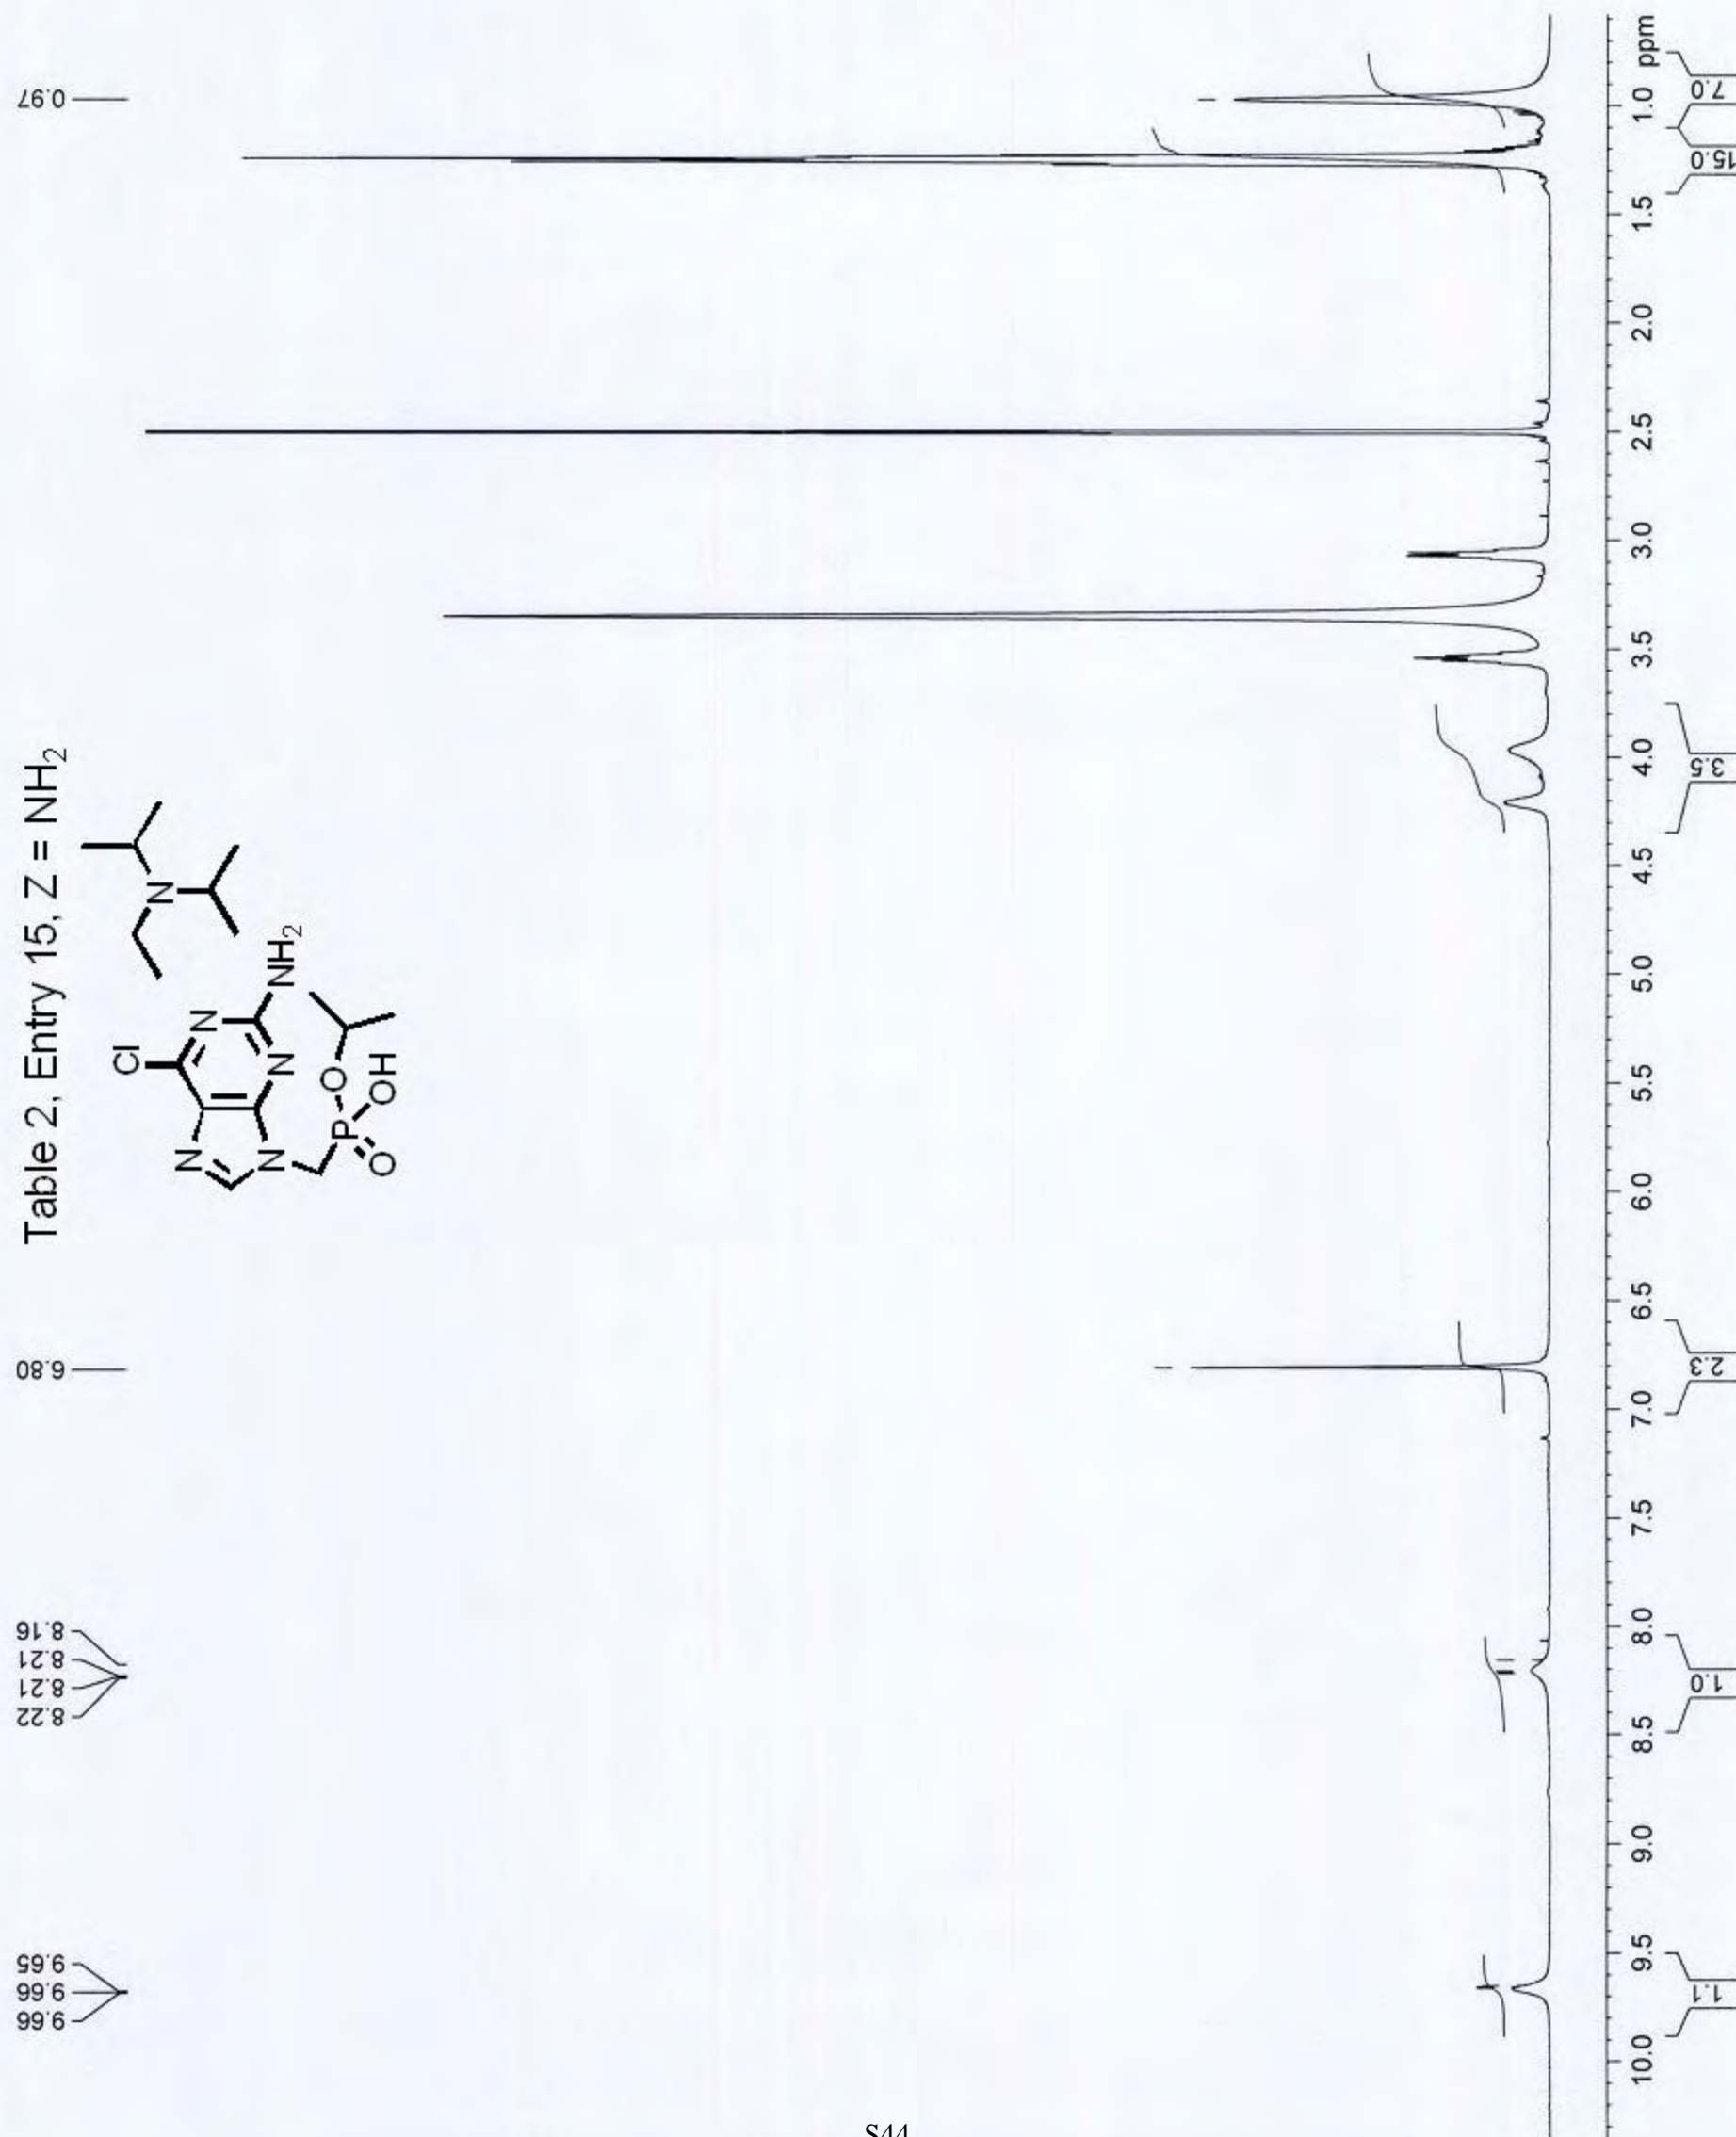

Dejmek\_MD333  
1H NMR in DMSO  
26-9-11 DR  
\*\*\*\*\*

NAME Dejmek\_MD333  
EXPNO 1  
PROCNO 1  
Date\_ 20110926  
Time\_ 8.58  
INSTRUM spect  
PROBHD 5 mm TXI 1H-  
PULPROG zg30  
TD 60094  
SOLVENT DMSO  
NS 32  
DS 0  
SWH 7507.507 Hz  
FIDRES 0.124929 Hz  
AQ 4.0023770 sec  
RG 14.3  
DW 66.600 usec  
DE 6.00 usec  
TE 300.0 K  
D1 1.0000000 sec  
TD0 1

==== CHANNEL f1 =  
NUC1 1H  
P1 9.00 usec  
PL1 3.00 dB  
PL1W 4.28034639 V  
SFO1 499.9534997 M  
SI 131072  
SF 499.9500008 MH  
WDW no  
SSB 0  
LB 0.00 Hz  
GB 0  
PC 1.00

Table 2, Entry 15, Z = NH<sub>2</sub>

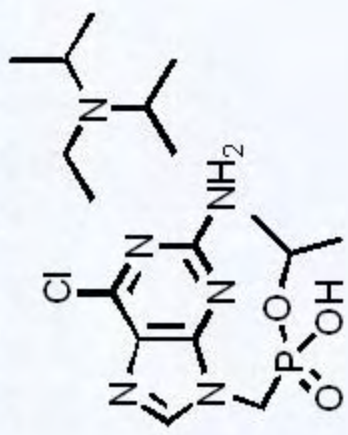

Dejmek\_MD333  
APT in DMSO  
26-9-11 DR  
\*\*\*\*\*

NAME Dejmek\_MD333  
EXPNO 2  
PROCNO 1  
Date\_ 20110926  
Time\_ 10.17  
INSTRUM spect  
PROBHD 5 mm TXI 1H-13  
PULPROG jmod  
TD 65536  
SOLVENT DMSO  
NS 4257  
DS 4  
SWH 30030.029 Hz  
FIDRES 0.458222 Hz  
AQ 1.0912410 sec  
RG 29193  
DE 16.650 usec  
TE 300.0 K  
CNST2 165.0000000  
CNST11 1.0000000  
D1 2.00000000 sec  
D20 0.00606061 sec  
TD0 1

==== CHANNEL f1 =====  
NUC1 13C  
P1 14.50 usec  
P2 29.00 usec  
PL1 0.00 dB  
PL1W 67.82093048 W  
SFO1 125.7263554 MHz

==== CHANNEL f2 =====  
CPDPRG2 waltz16  
NUC2 1H  
PCPD2 60.00 usec  
PL2 3.00 dB  
PL12 19.48 dB  
PL2W 4.28034639 W  
PL12W 0.09626734 W  
SFO2 499.9519998 MHz  
SI 131072  
SF 125.7125647 MHz  
WDW EM  
SSB 0  
LB 1.00 Hz  
GB 0  
PC 1.00

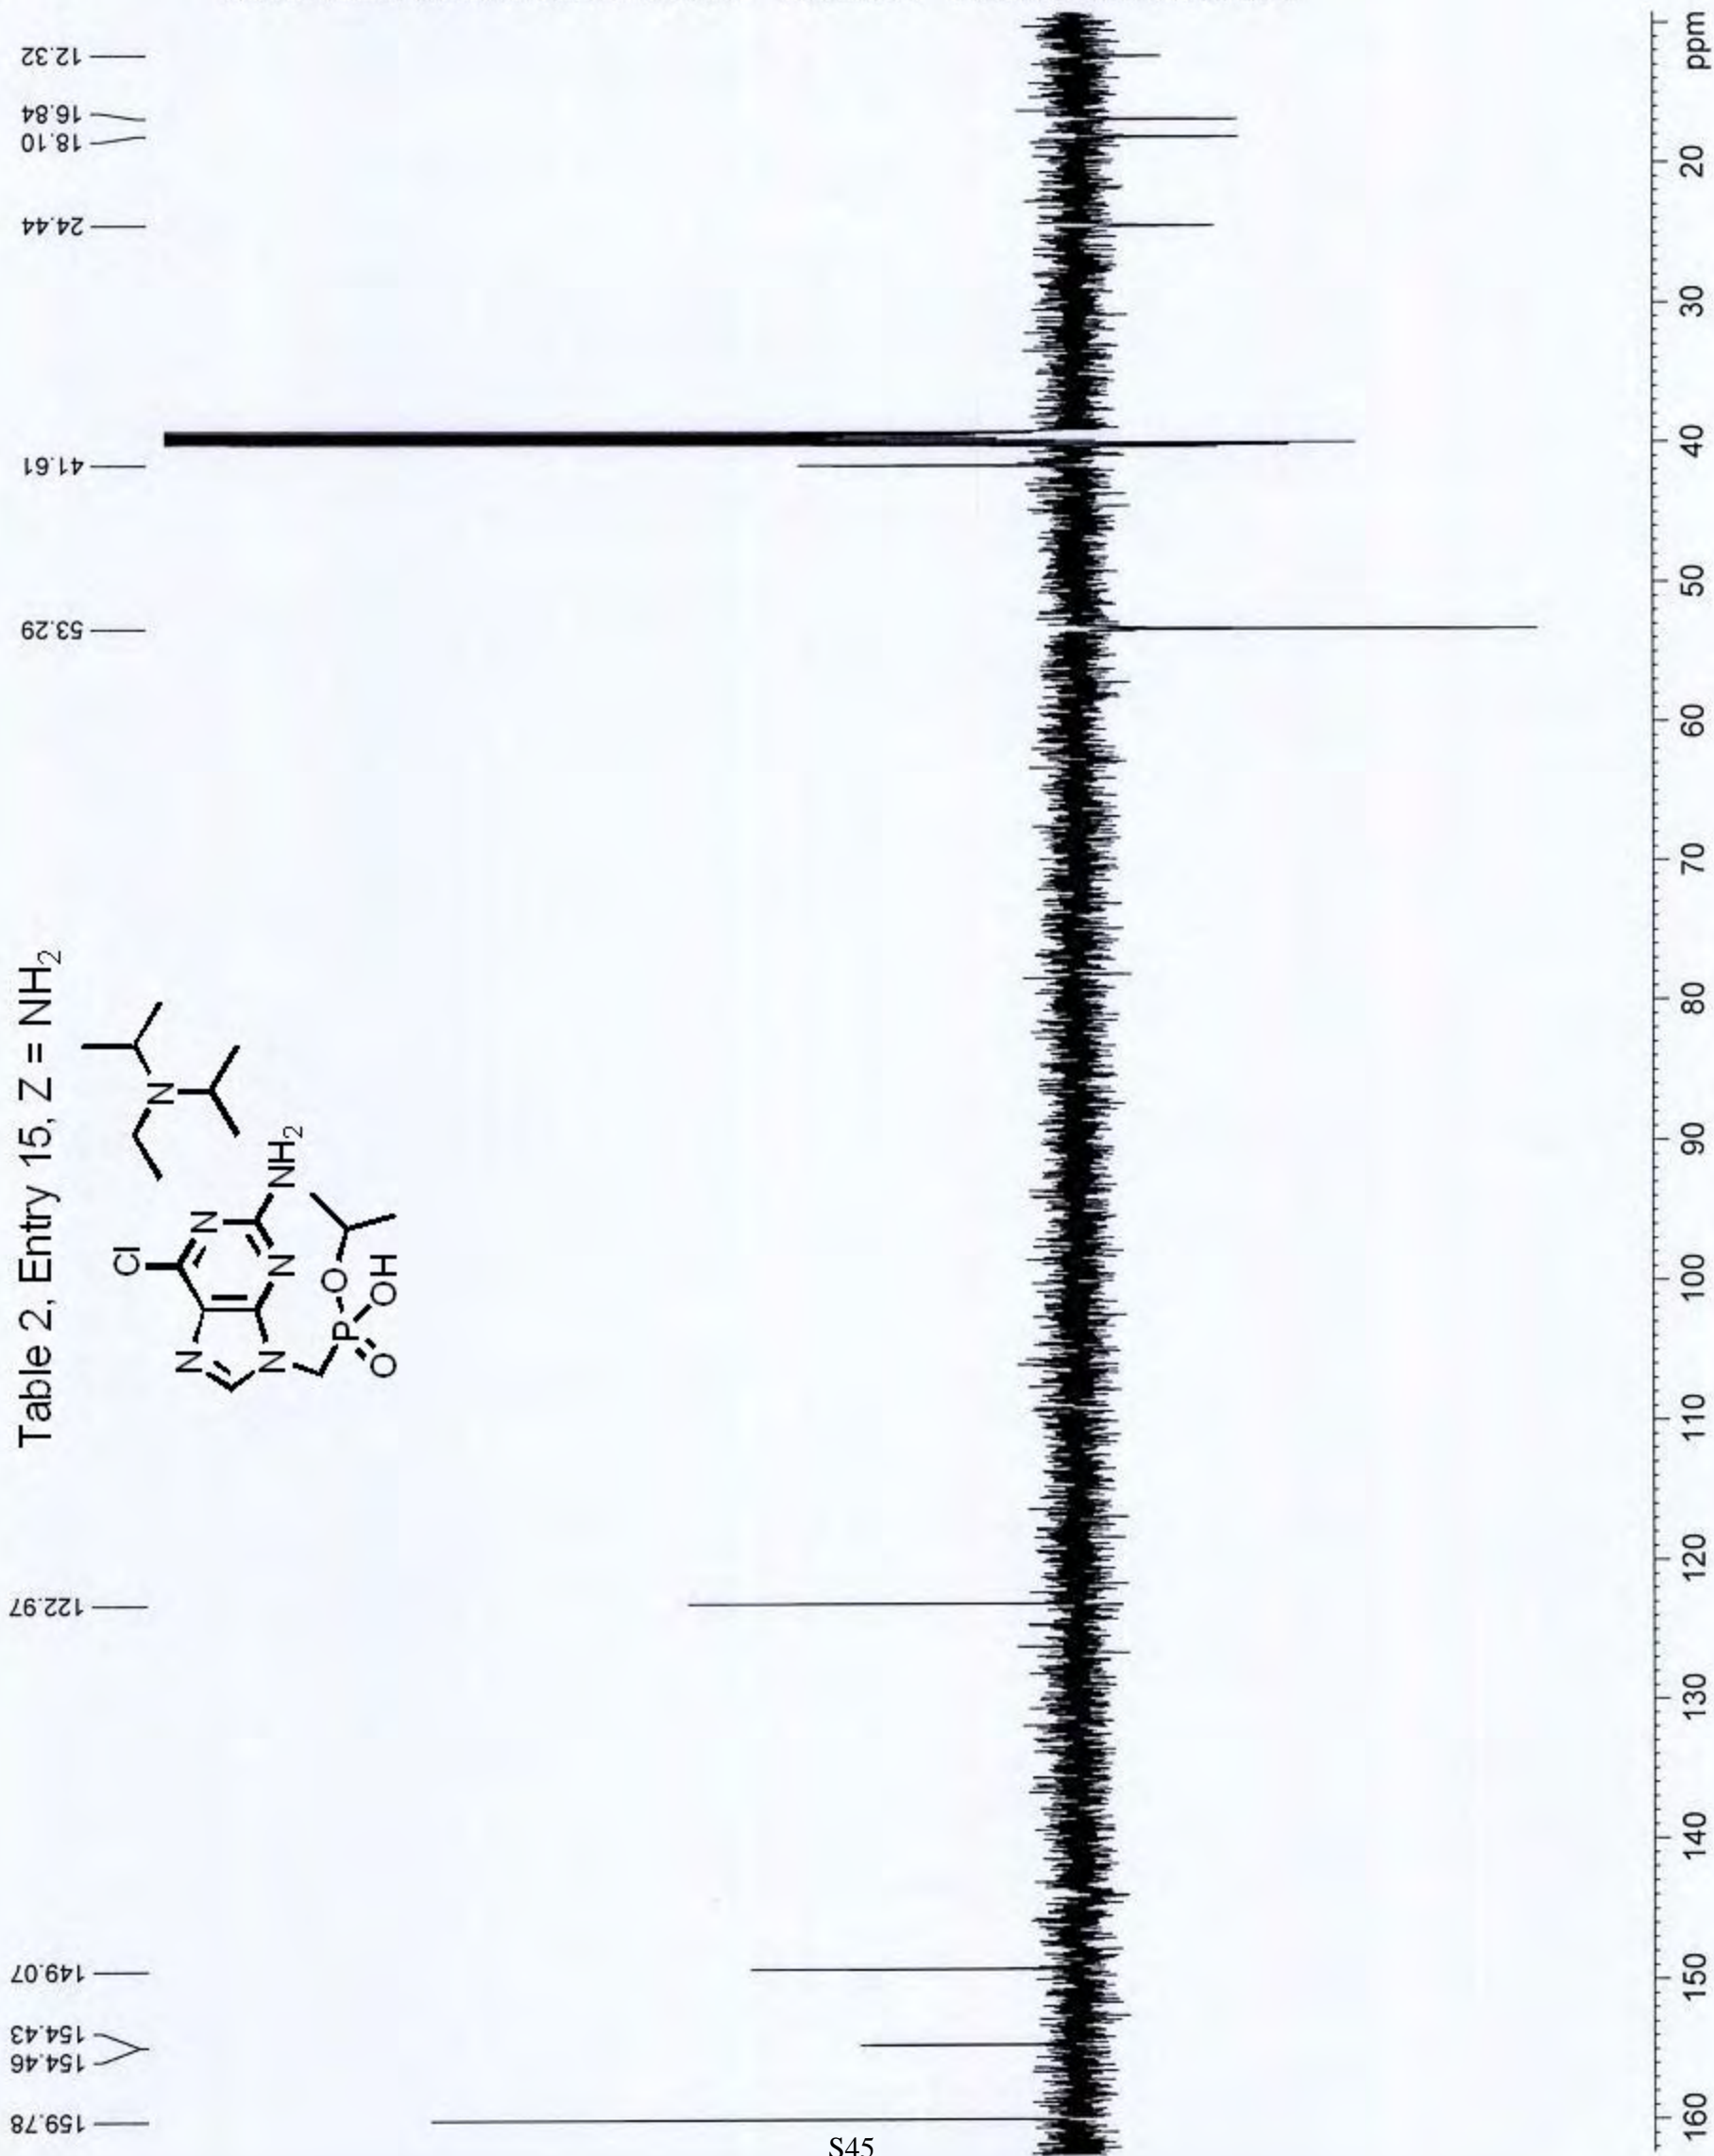

Table 2, Entry 16, Z = H

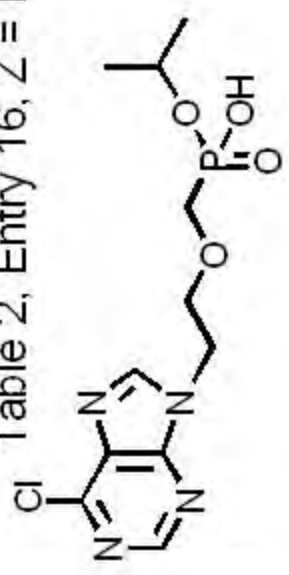

Dejmek\_MD395  
1H NMR in DMSO  
15-12-11 DR  
\*\*\*\*\*

Current Data Parameters  
NAME Dejmek\_MD395  
EXPNO 1  
PROCNO 1  
F2 - Acquisition Parameters  
Date\_ 20111215  
Time 14.14  
INSTRUM spect  
PROBHD 5 mm TXI 1H-13  
PULPROG zg30  
TD 60094  
SOLVENT DMSO  
NS 32  
DS 0  
SWH 7507.507 Hz  
FIDRES 0.124929 Hz  
AQ 4.0023770 sec  
RG 14.3  
EQ 66.600 usec  
DE 6.00 usec  
TE 300.0 K  
D1 1.00000000 sec  
TD0 1  
===== CHANNEL f1 =====  
NUC1 1H  
P1 8.00 usec  
PL1 0.00 dB  
PL1M 8.54041386 M  
SFO1 499.953497 MHz  
F2 - Processing parameters  
SI 489.9499973 MHz  
SF 131.072  
WDW no  
SSB 0  
LB 0.00 Hz  
GB 0  
PC 1.00

8.78  
8.77

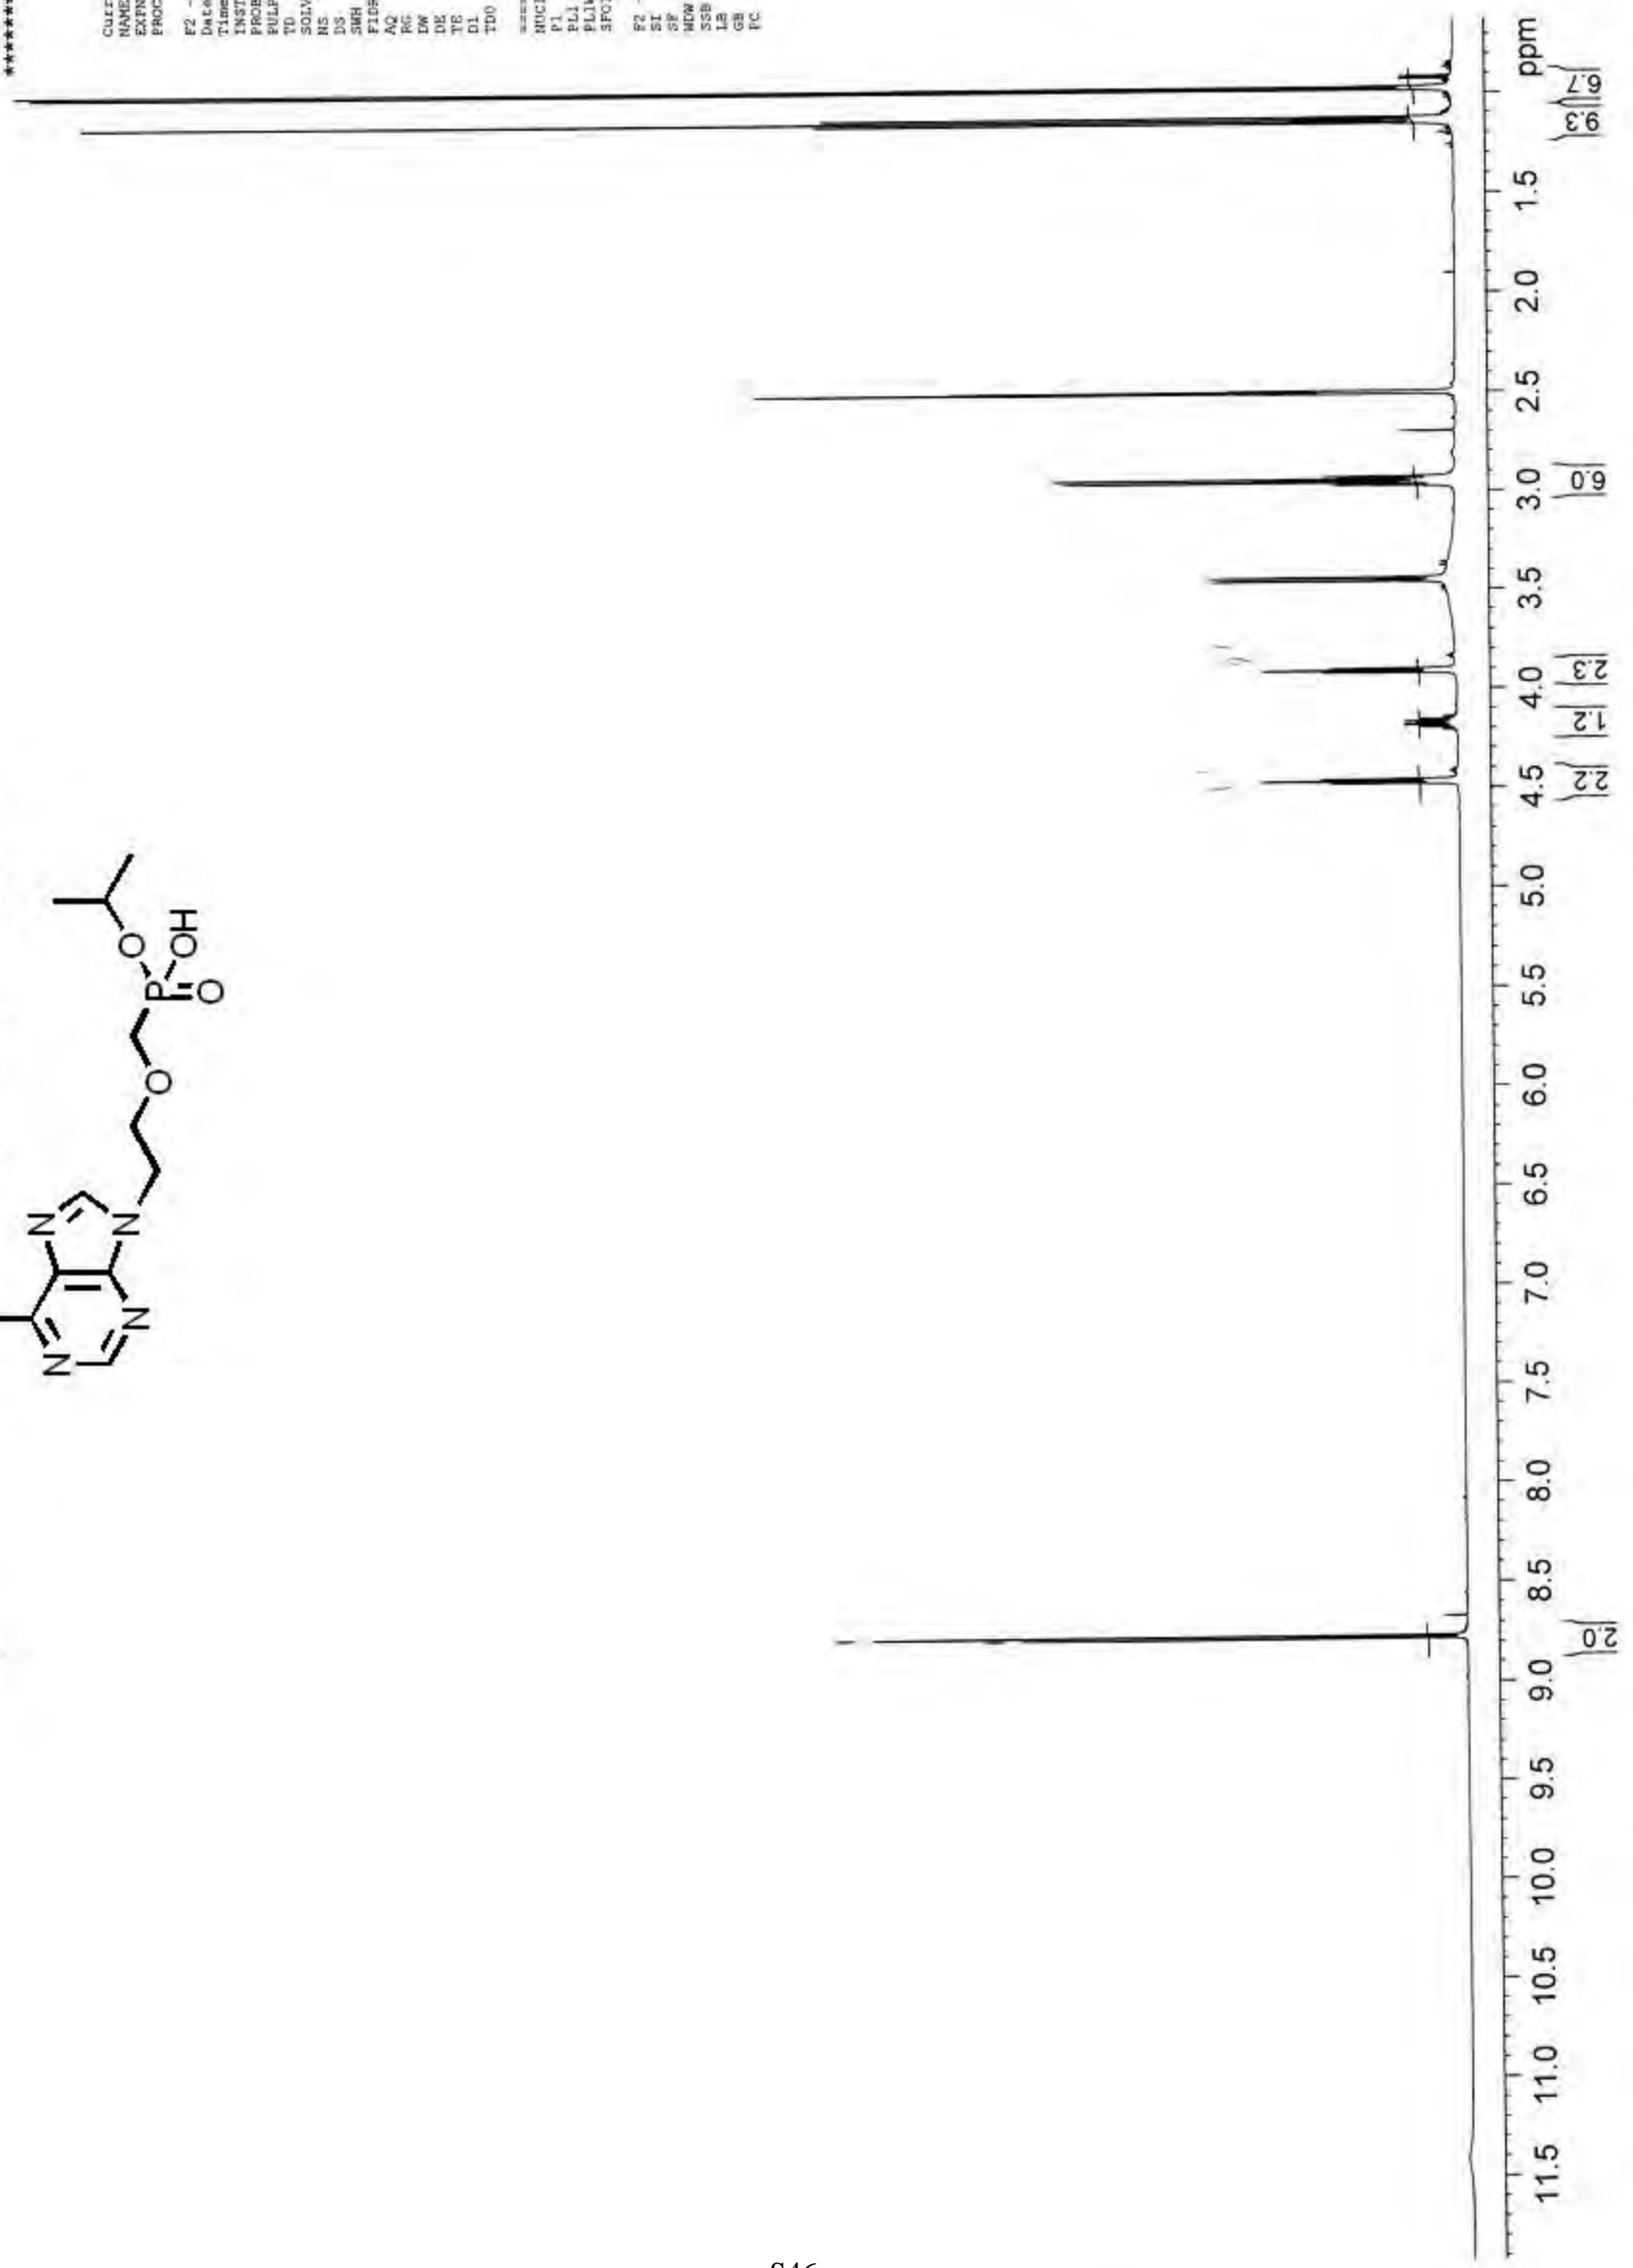

Dejmek\_MD395  
 APT in DMSO  
 15-12-11 DR  
 \*\*\*\*\*

NAME Dejmek\_MD395  
 EXPNO 2  
 PROCNO 1  
 Date\_ 20111215  
 Time 15.09  
 INSTRUM spect  
 PROBHD 5 mm TXI 1H-13  
 PULPROG jmod  
 TD 65536  
 SOLVENT DMSO  
 NS 1048  
 DS 4  
 SWH 30030.029 Hz  
 FIDRES 0.458222 Hz  
 AQ 1.0912410 sec  
 RG 29193  
 DW 16.650 usec  
 DE 6.50 usec  
 TE 300.0 K  
 CNST2 165.0000000  
 CNST11 1.0000000  
 D1 2.00000000 sec  
 D20 0.00606061 sec  
 TD0 1

===== CHANNEL f1 =====  
 NUC1 13C  
 P1 14.75 usec  
 P2 29.50 usec  
 PL1 0.00 dB  
 PL1W 67.82093048 W  
 SFO1 125.7263554 MHz

===== CHANNEL f2 =====  
 CPDPRG2 waltz16  
 NUC2 1H  
 PCPD2 60.00 usec  
 PL2 0.00 dB  
 PL12 17.50 dB  
 PL2W 8.54041386 W  
 PL12W 0.15187243 W  
 SFO2 499.9519998 MHz  
 SI 131072  
 SF 125.7125648 MHz  
 WDW EM  
 SSB 0  
 LB 1.00 Hz  
 GB 0  
 PC 1.00

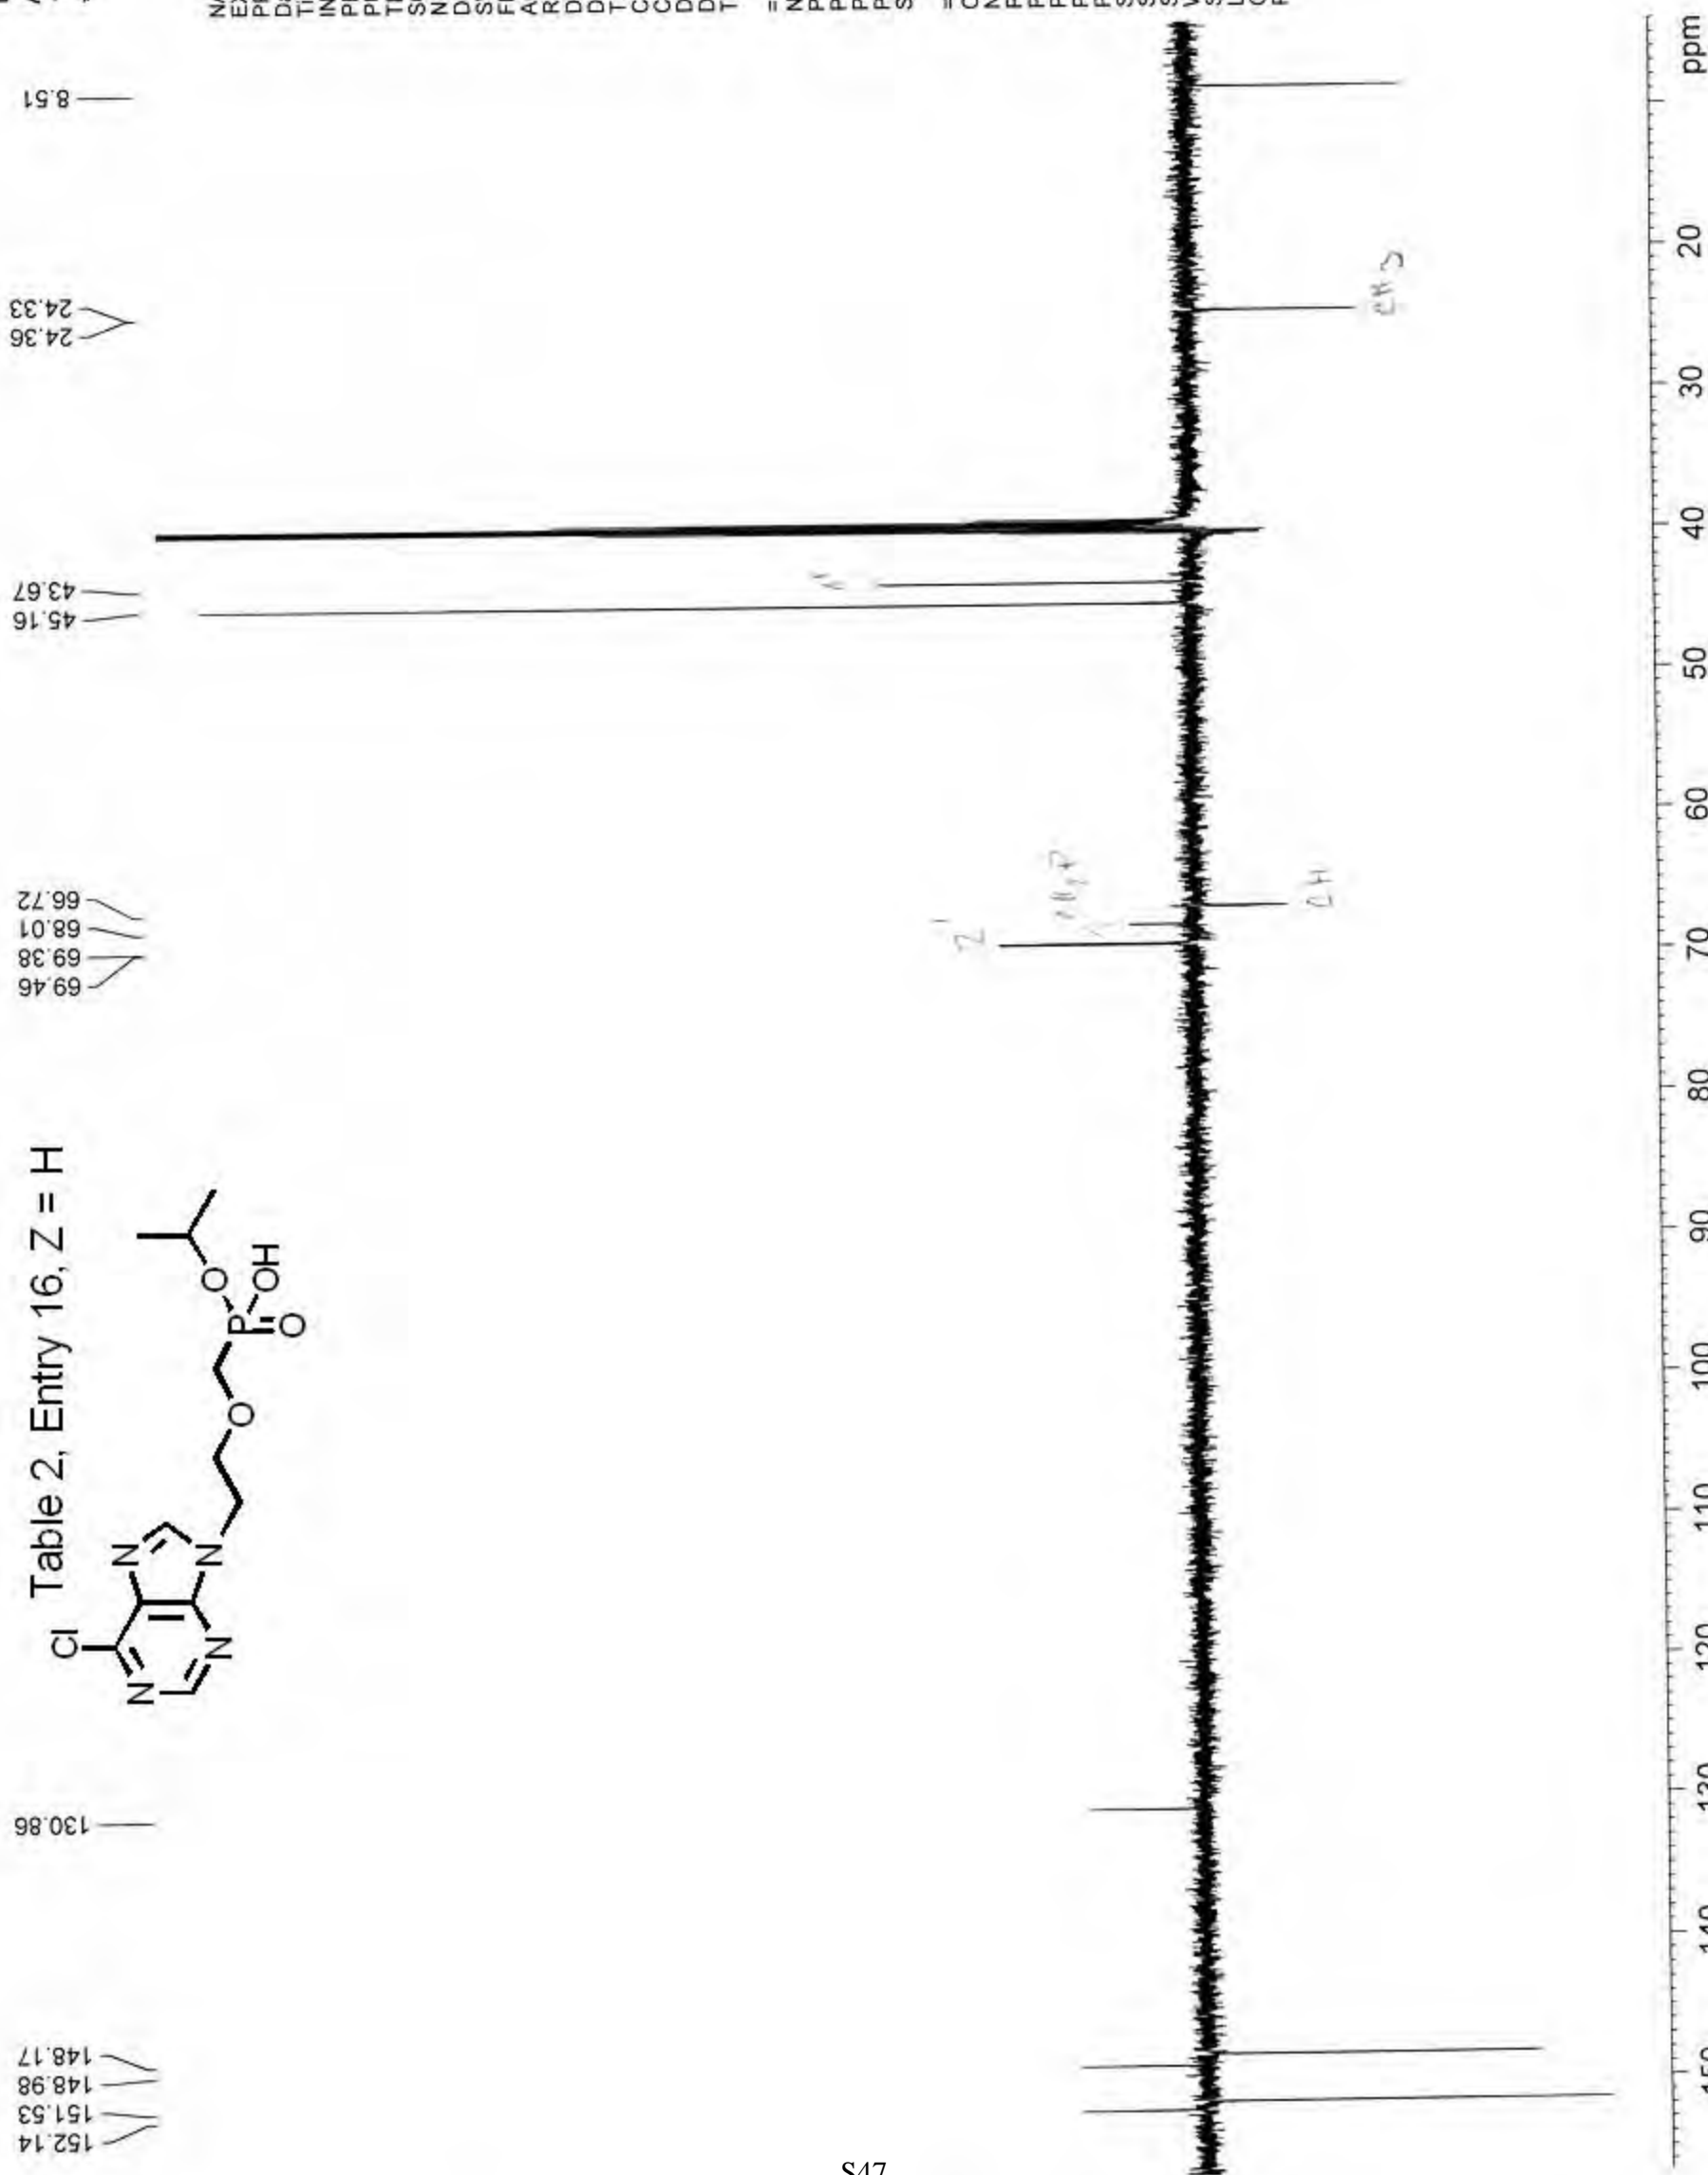

Table 2, Entry 16, Z = H

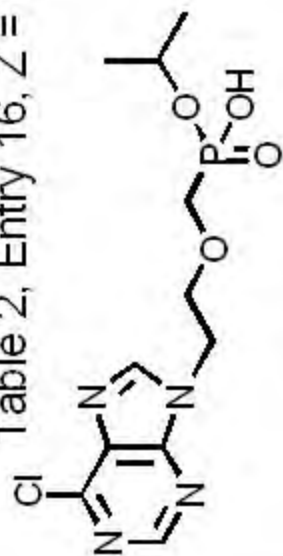

Dejmek\_MD396  
1H NMR in DMSO  
16-12-11 DR  
\*\*\*\*\*

NAME Dejmek\_MD396  
EXPNO 1  
PROCNO 1  
Date\_ 20111216  
Time 9.04  
INSTRUM spect  
PROBHD 5 mm TXI 1H-13  
PULPROG zg30  
TD 60094  
SOLVENT DMSO  
NS 32  
DS 0  
SWH 7507.507 Hz  
FIDRES 0.124929 Hz  
AQ 4.0023770 sec  
RG 14.3  
DW 66.600 usec  
DE 6.00 usec  
TE 300.0 K  
D1 1.0000000 sec  
TD0 1

==== CHANNEL f1 =====  
NUC1 1H  
P1 8.00 usec  
PL1 0.00 dB  
PL1W 8.54041386 W  
SFO1 499.9534997 MHz  
SI 131072  
SF 499.9499979 MHz  
WDW no  
SSB 0  
LB 0.00 Hz  
GB 0  
PC 1.00

Cl Table 2, Entry 16, Z = NH<sub>2</sub>

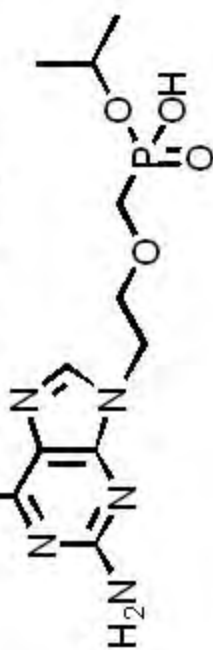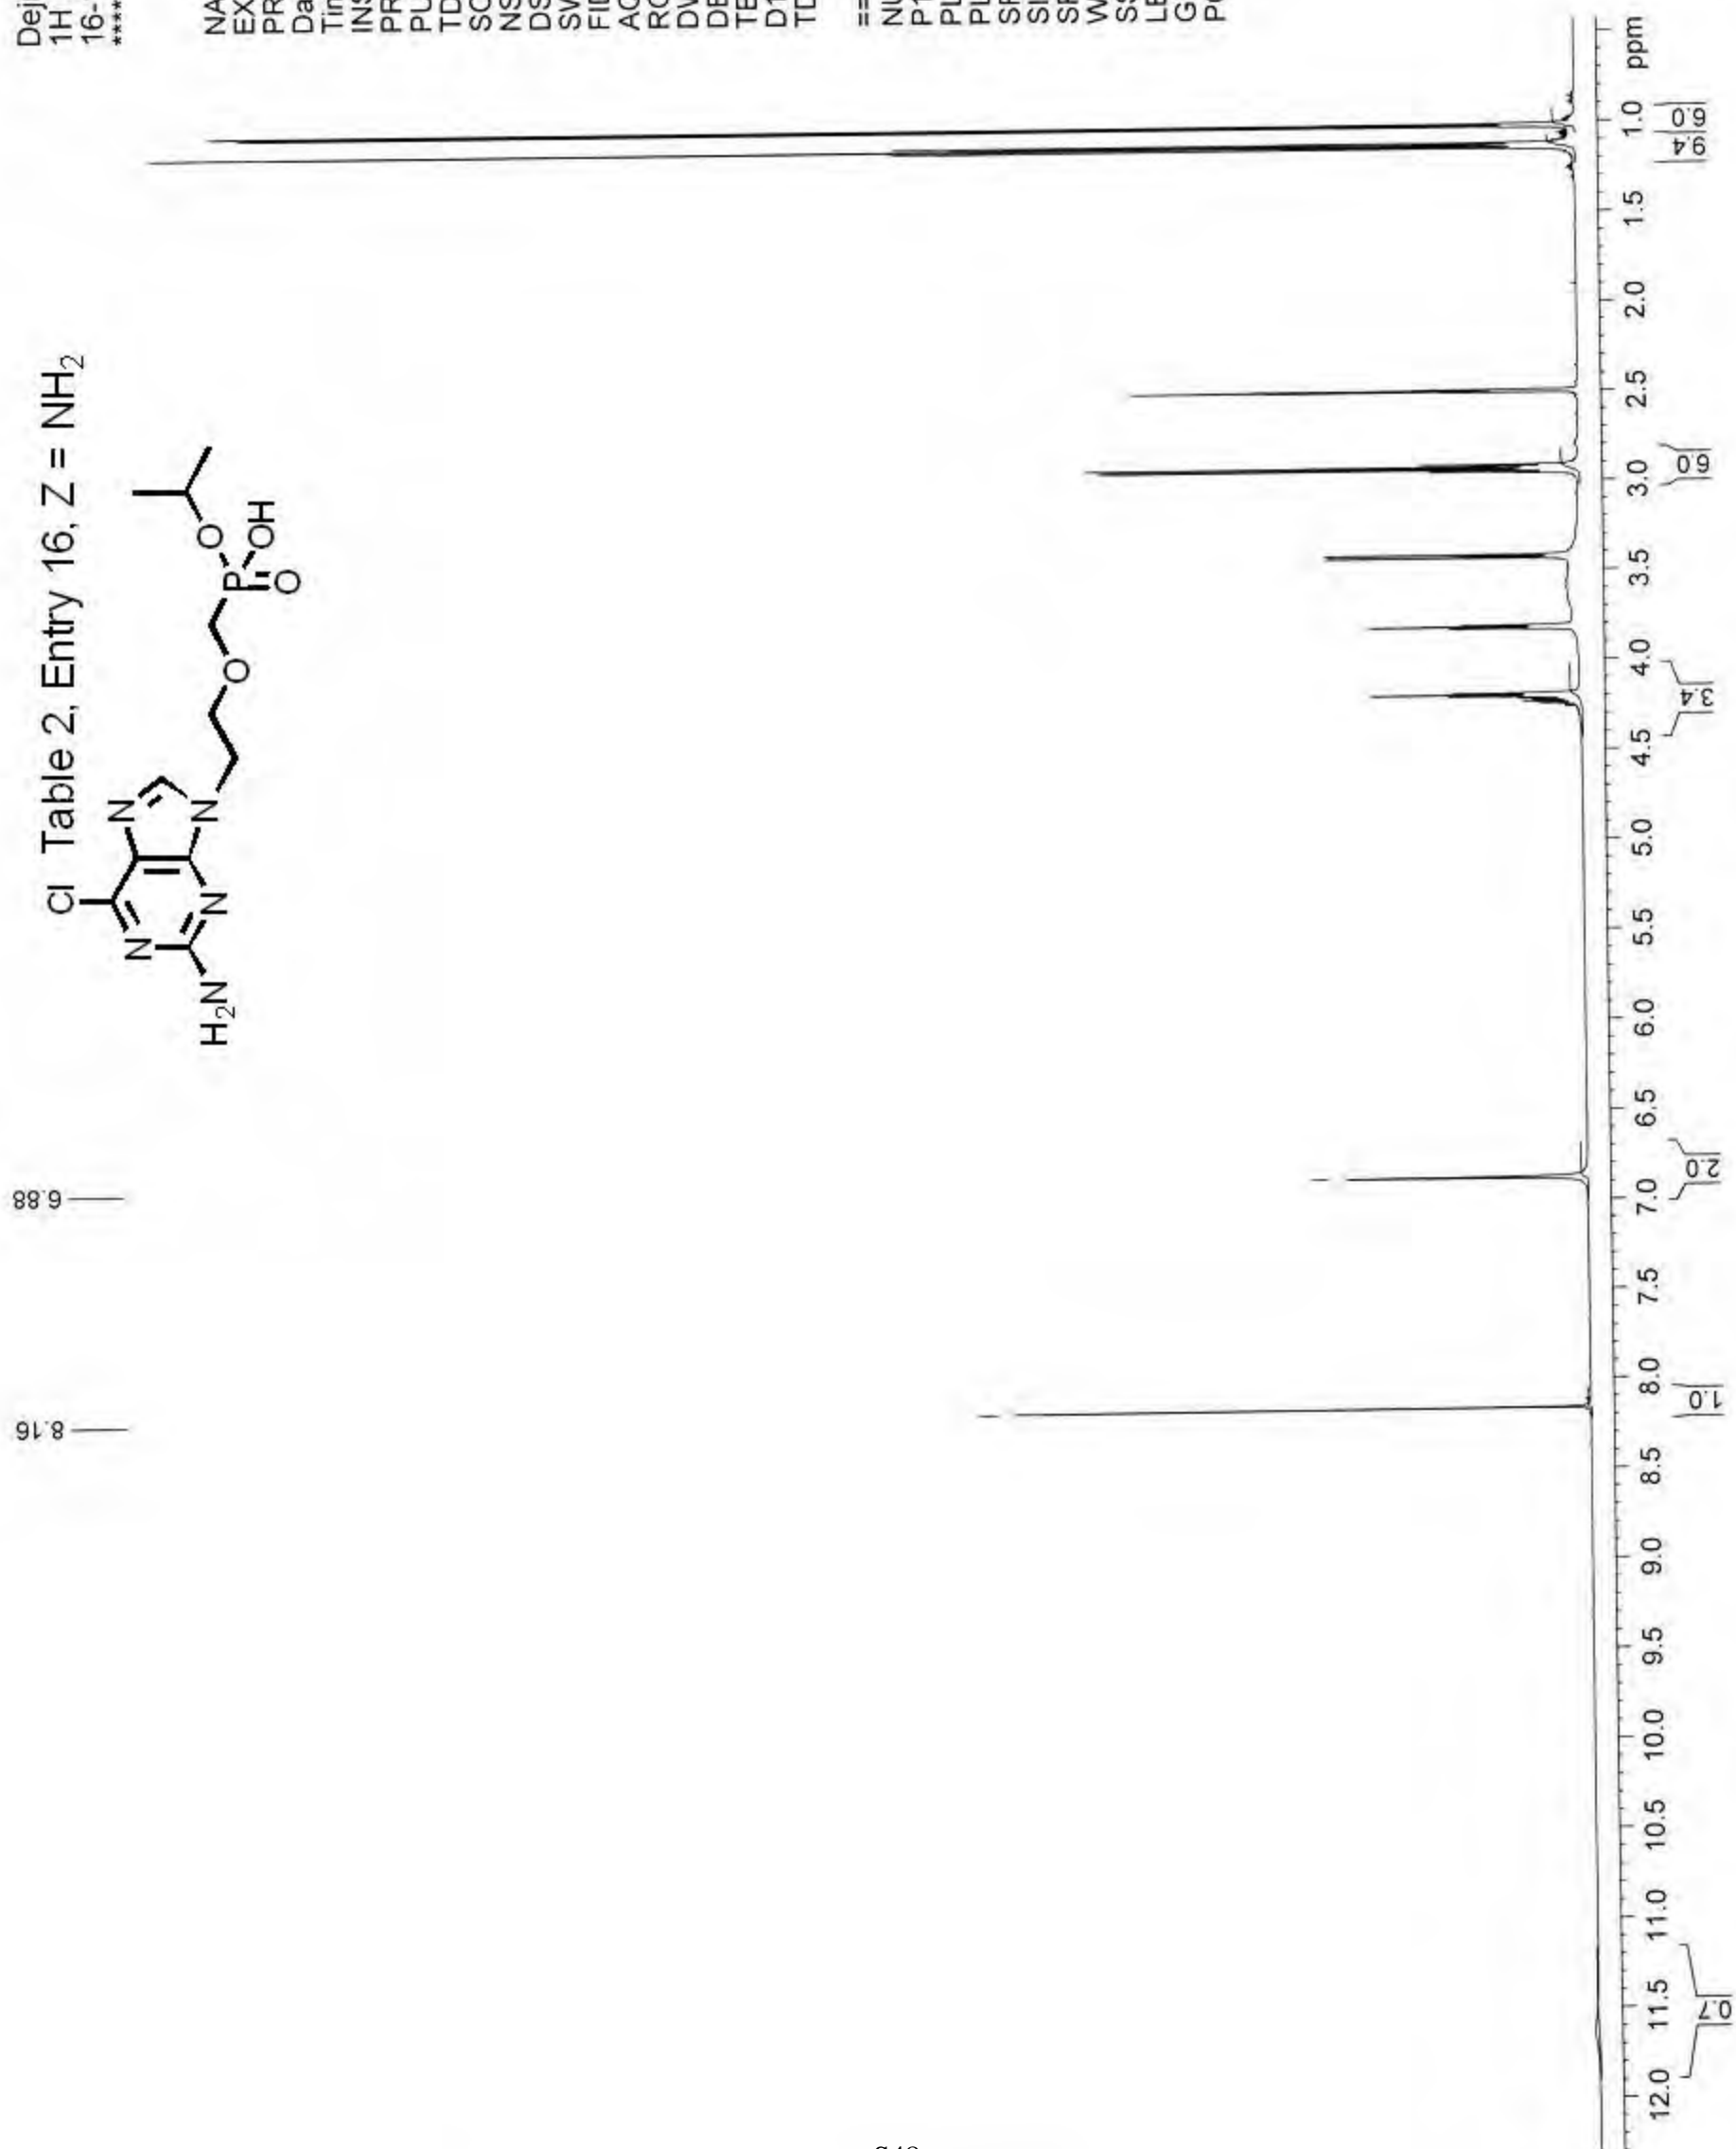



Dejmek\_MD396  
APT in DMSO  
16-12-11 DR  
\*\*\*\*\*

NAME Dejmek\_MD396  
EXPNO 2  
PROCNO 1  
Date\_ 20111216  
Time\_ 9.25  
INSTRUM spect  
PROBHD 5 mm TXI 1H-13  
PULPROG jmod  
TD 65536  
SOLVENT DMSO  
NS 389  
DS 4  
SWH 30030.029 Hz  
FIDRES 0.458222 Hz  
AQ 1.0912410 sec  
RG 29193  
DW 16.650 usec  
DE 6.50 usec  
TE 300.0 K  
CNST2 165.0000000  
CNST11 1.0000000  
D1 2.00000000 sec  
D20 0.00606061 sec  
TD0 1

==== CHANNEL f1 =====  
NUC1 13C  
P1 14.75 usec  
P2 29.50 usec  
PL1 0.00 dB  
PL1W 67.82093048 W  
SFO1 125.7263554 MHz

==== CHANNEL f2 =====  
CPDPRG2 waltz16  
NUC2 1H  
PCPD2 60.00 usec  
PL2 0.00 dB  
PL12 17.50 dB  
PL2W 8.54041386 W  
PL12W 0.15187243 W  
SFO2 499.9519998 MHz  
SI 131072  
SF 125.7125635 MHz  
WDW EM  
SSB 0  
LB 1.00 Hz  
GB 0  
PC 1.00

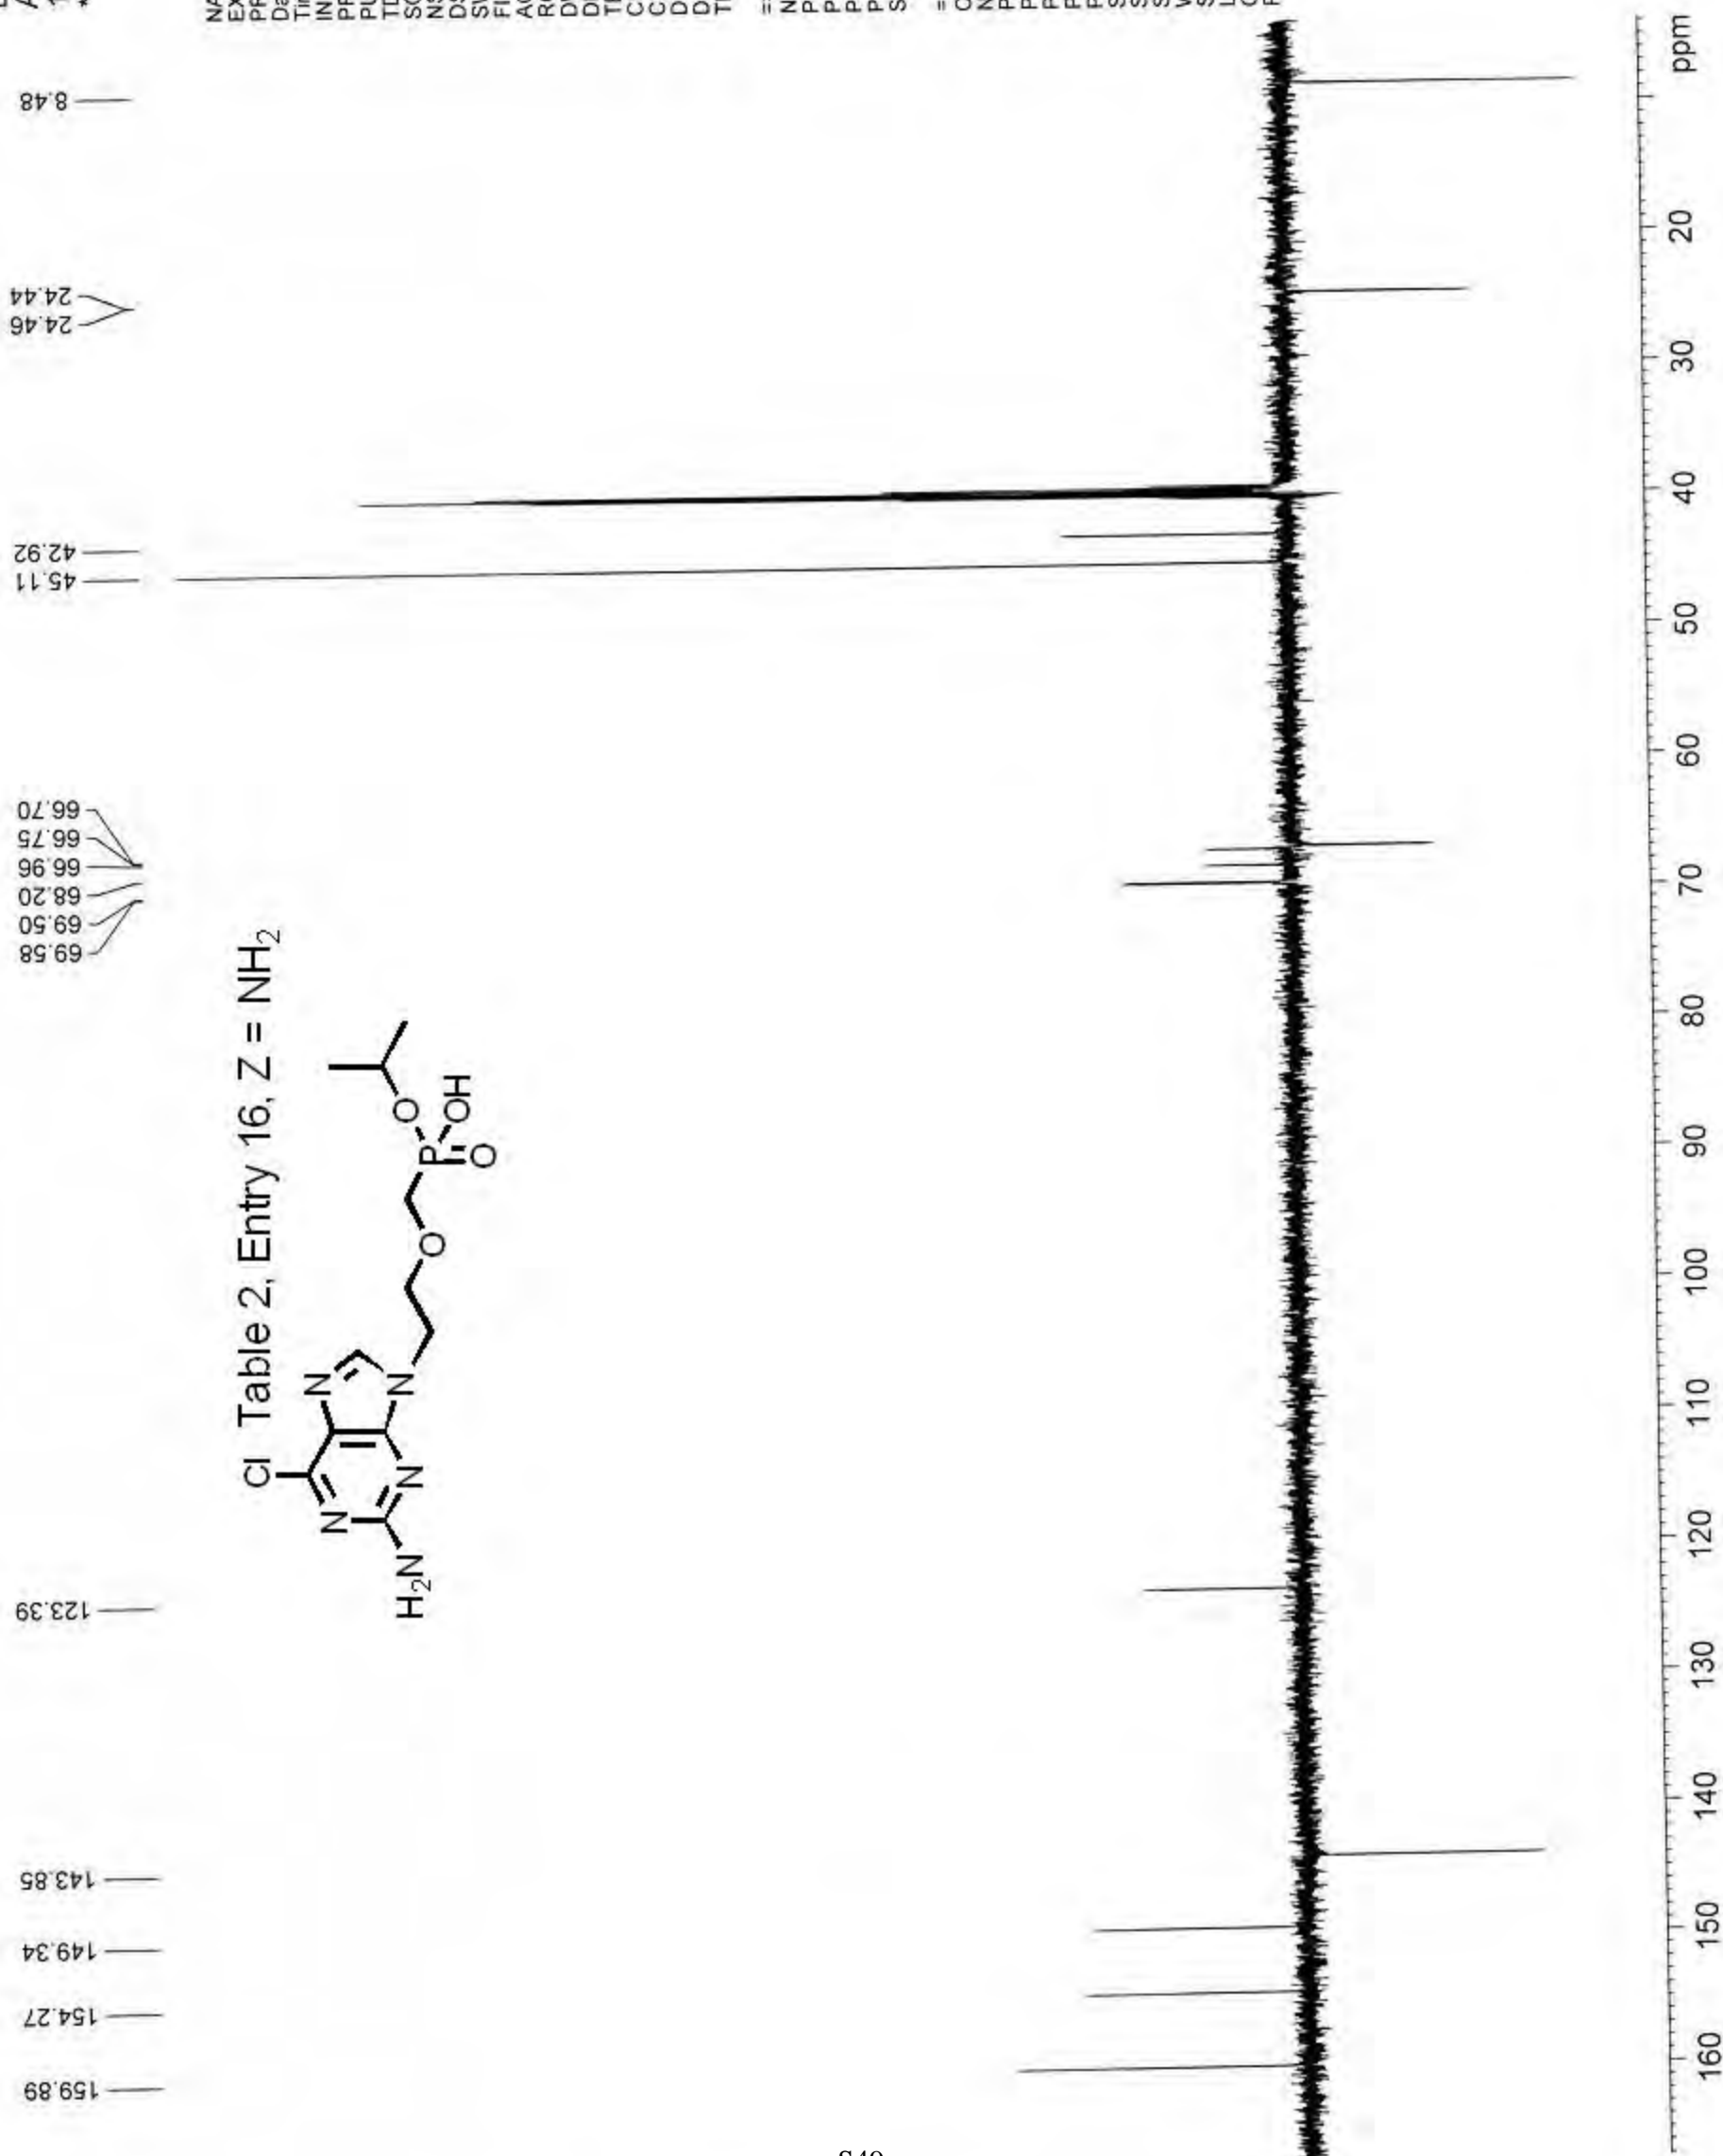

Dejmek\_MD379  
 1H NMR in DMSO  
 25-11-11 DR  
 \*\*\*\*\*

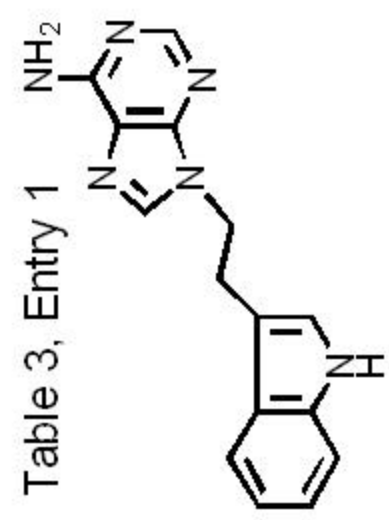

```

Current Data Parameters
NAME      Dejmek_MD379
EXPNO    1
PROCNO   1

F2 - Acquisition Parameters
Date_    20111125
Time     16.15
INSTRUM  spect
PROBHD   5 mm TXI 1H-13
PULPROG  zg30
TD       65536
SOLVENT  DMSO
NS       32
DS       0
SWH      7507.507 Hz
FIDRES   0.124929 Hz
AQ       4.0023770 sec
RG       14.3
DN       66.600 usec
DE       6.00 usec
TE       300.0 K
D1       1.00000000 sec
TD0      1

===== CHANNEL f1 =====
NUC1     1H
P1       8.00 usec
PL1     0.00 dB
PL1W    8.54041386 W
SFO1    499.9534997 MHz

F2 - Processing parameters
SI       131072
SF       499.9499979 MHz
WDW      hc
SSB      0
LB       0.00 Hz
GB       0
PC       1.00
    
```

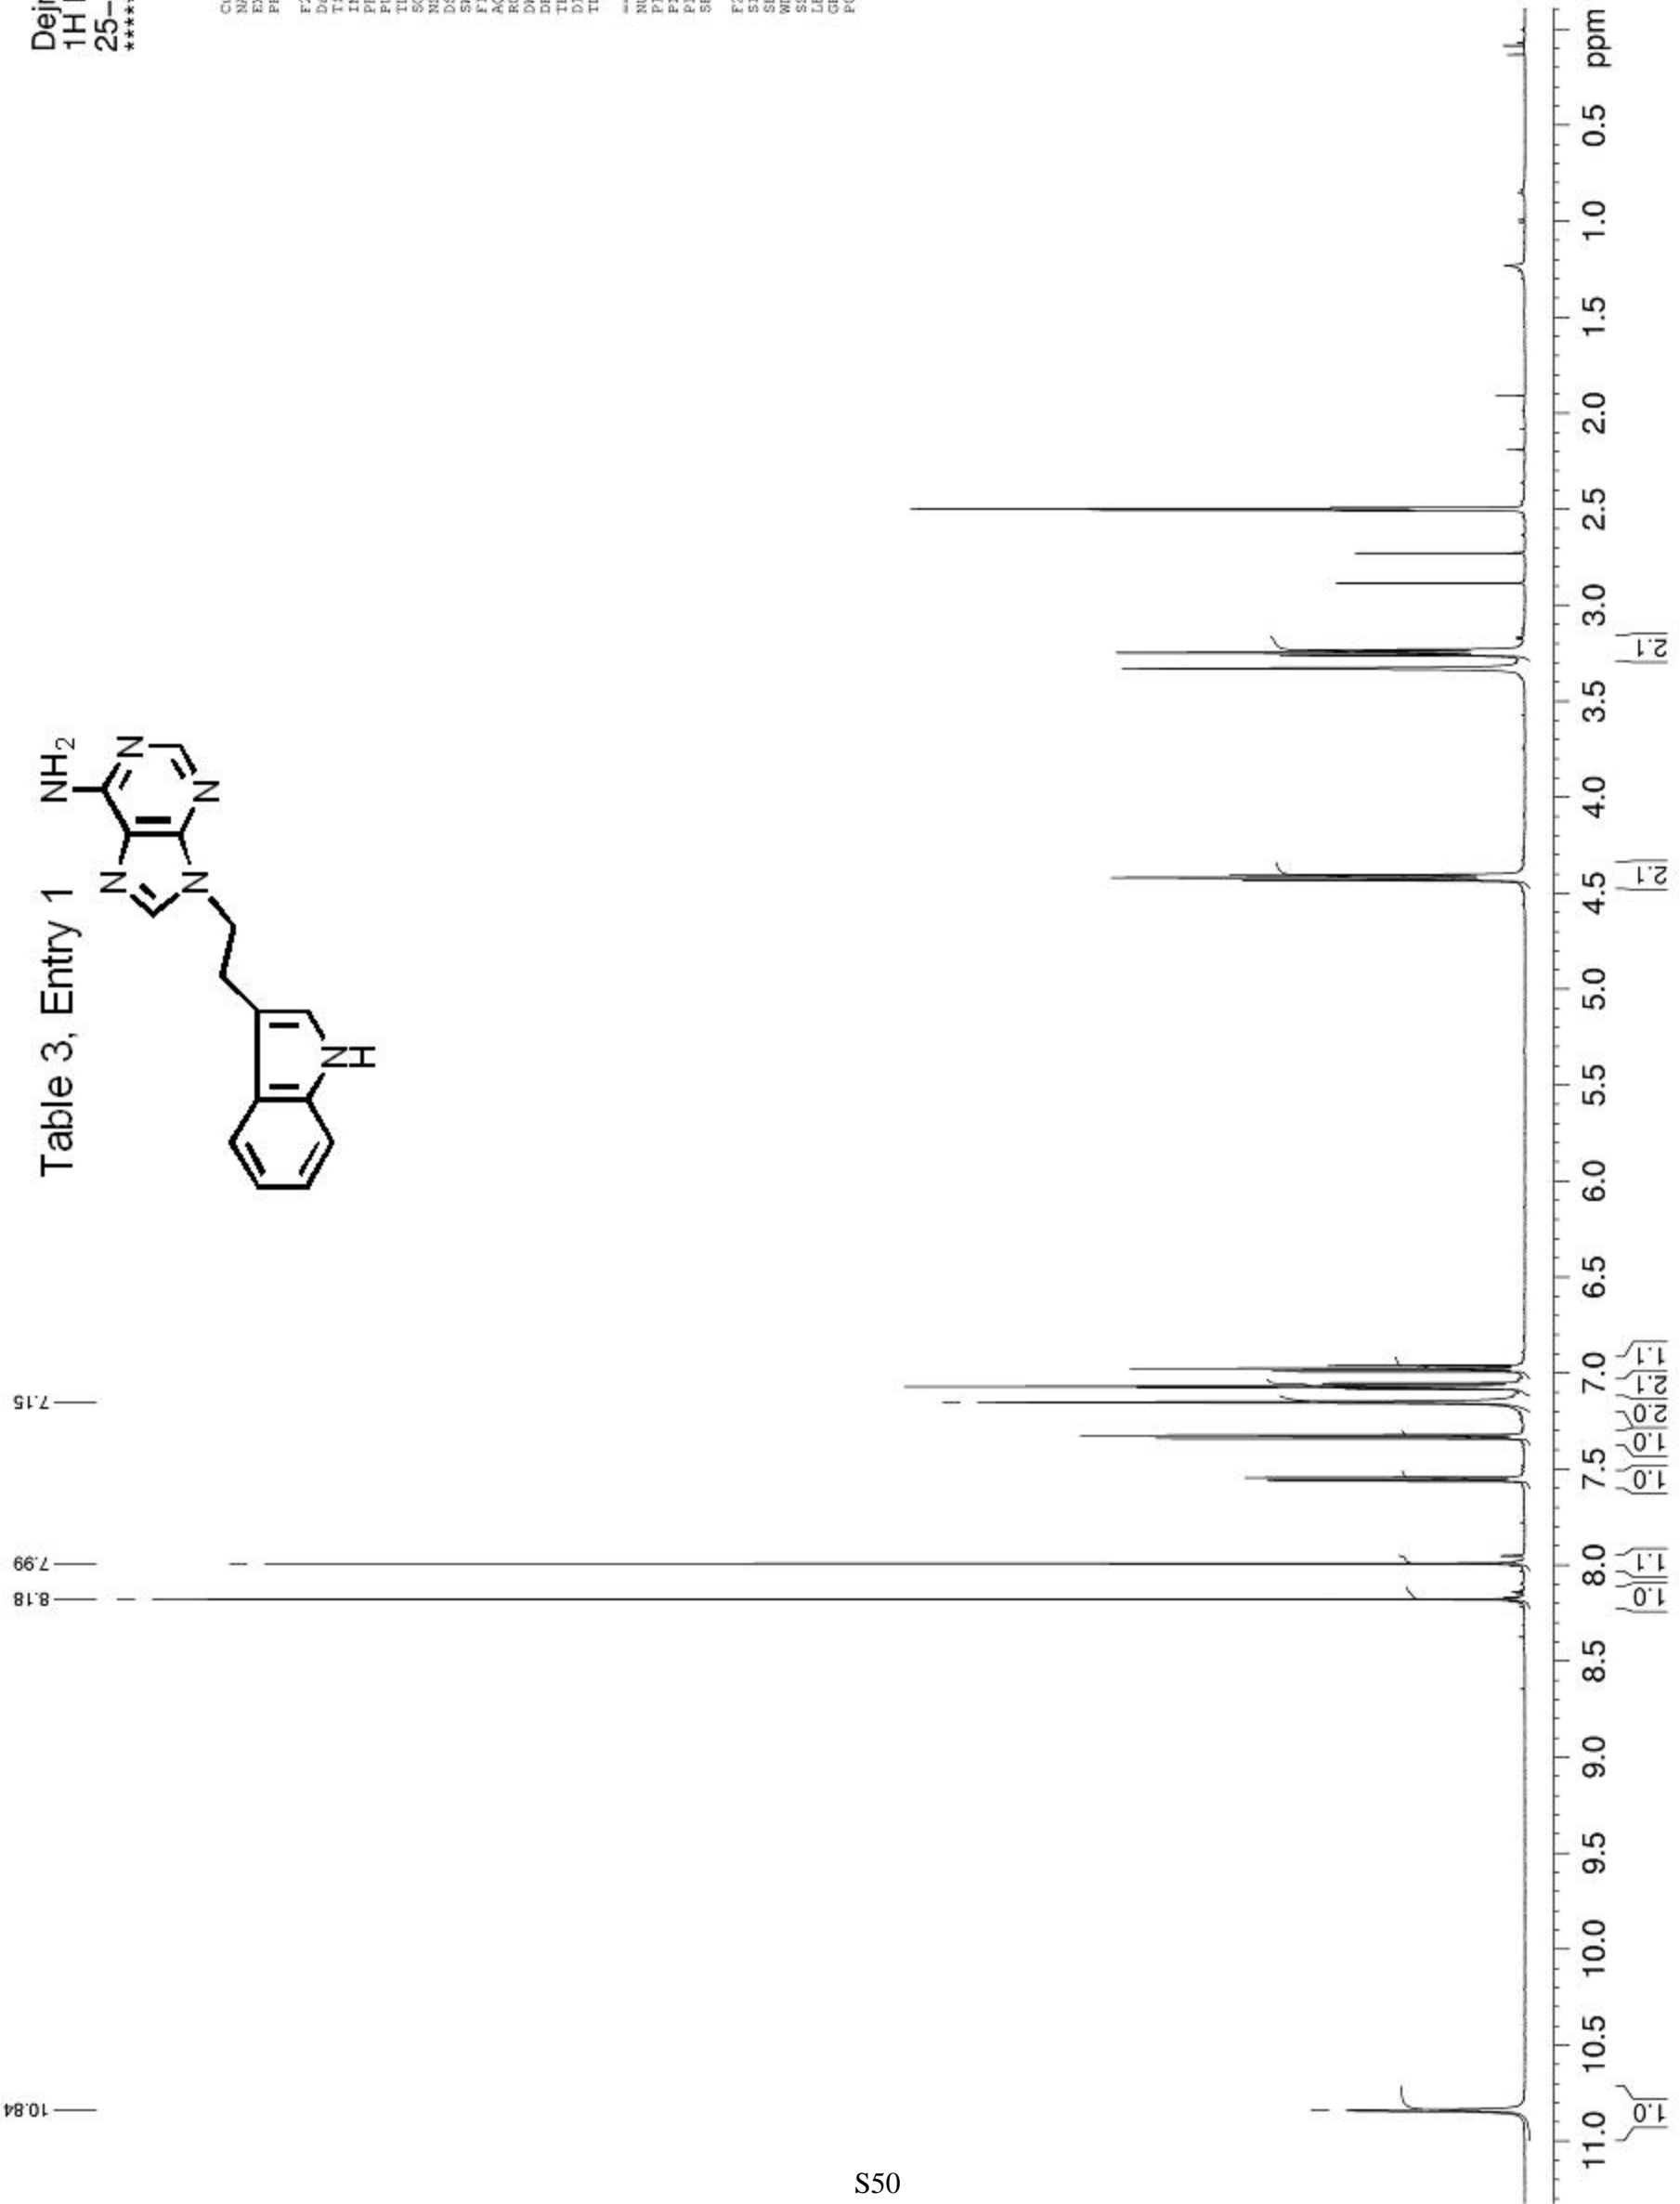

Dejmek\_MD379  
APT in DMSO  
25-11-11 DR  
\*\*\*\*\*

NAME Dejmek\_MD379  
EXPNO 2  
PROCNO 1  
Date\_ 20111125  
Time\_ 16.32  
INSTRUM spect  
PROBHD 5 mm TXI 1H-13  
PULPROG jmod  
TD 65536  
SOLVENT DMSO  
NS 312  
DS 4  
SWH 30030.029 Hz  
FIDRES 0.458222 Hz  
AQ 1.0912410 sec  
RG 29193  
DW 16.650 usec  
DE 6.50 usec  
TE 300.0 K  
CNST2 165.0000000  
CNST11 1.0000000  
D1 2.00000000 sec  
D20 0.00606061 sec  
TD0 1

==== CHANNEL f1 =====  
NUC1 13C  
P1 14.75 usec  
P2 29.50 usec  
PL1 0.00 dB  
PL1W 67.82093048 W  
SFO1 125.7263554 MHz

==== CHANNEL f2 =====  
CPDPRG2 waltz16  
NUC2 1H  
PCPD2 60.00 usec  
PL2 0.00 dB  
PL12 17.50 dB  
PL2W 8.54041386 W  
PL12W 0.15187243 W  
SFO2 499.9519998 MHz  
SI 131072  
SF 125.7125642 MHz  
WDW EM  
SSB 0  
LB 1.00 Hz  
GB 0  
PC 1.00

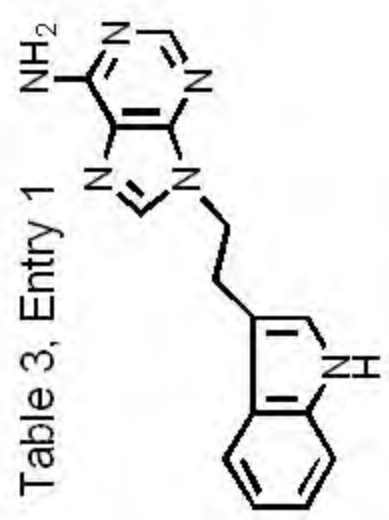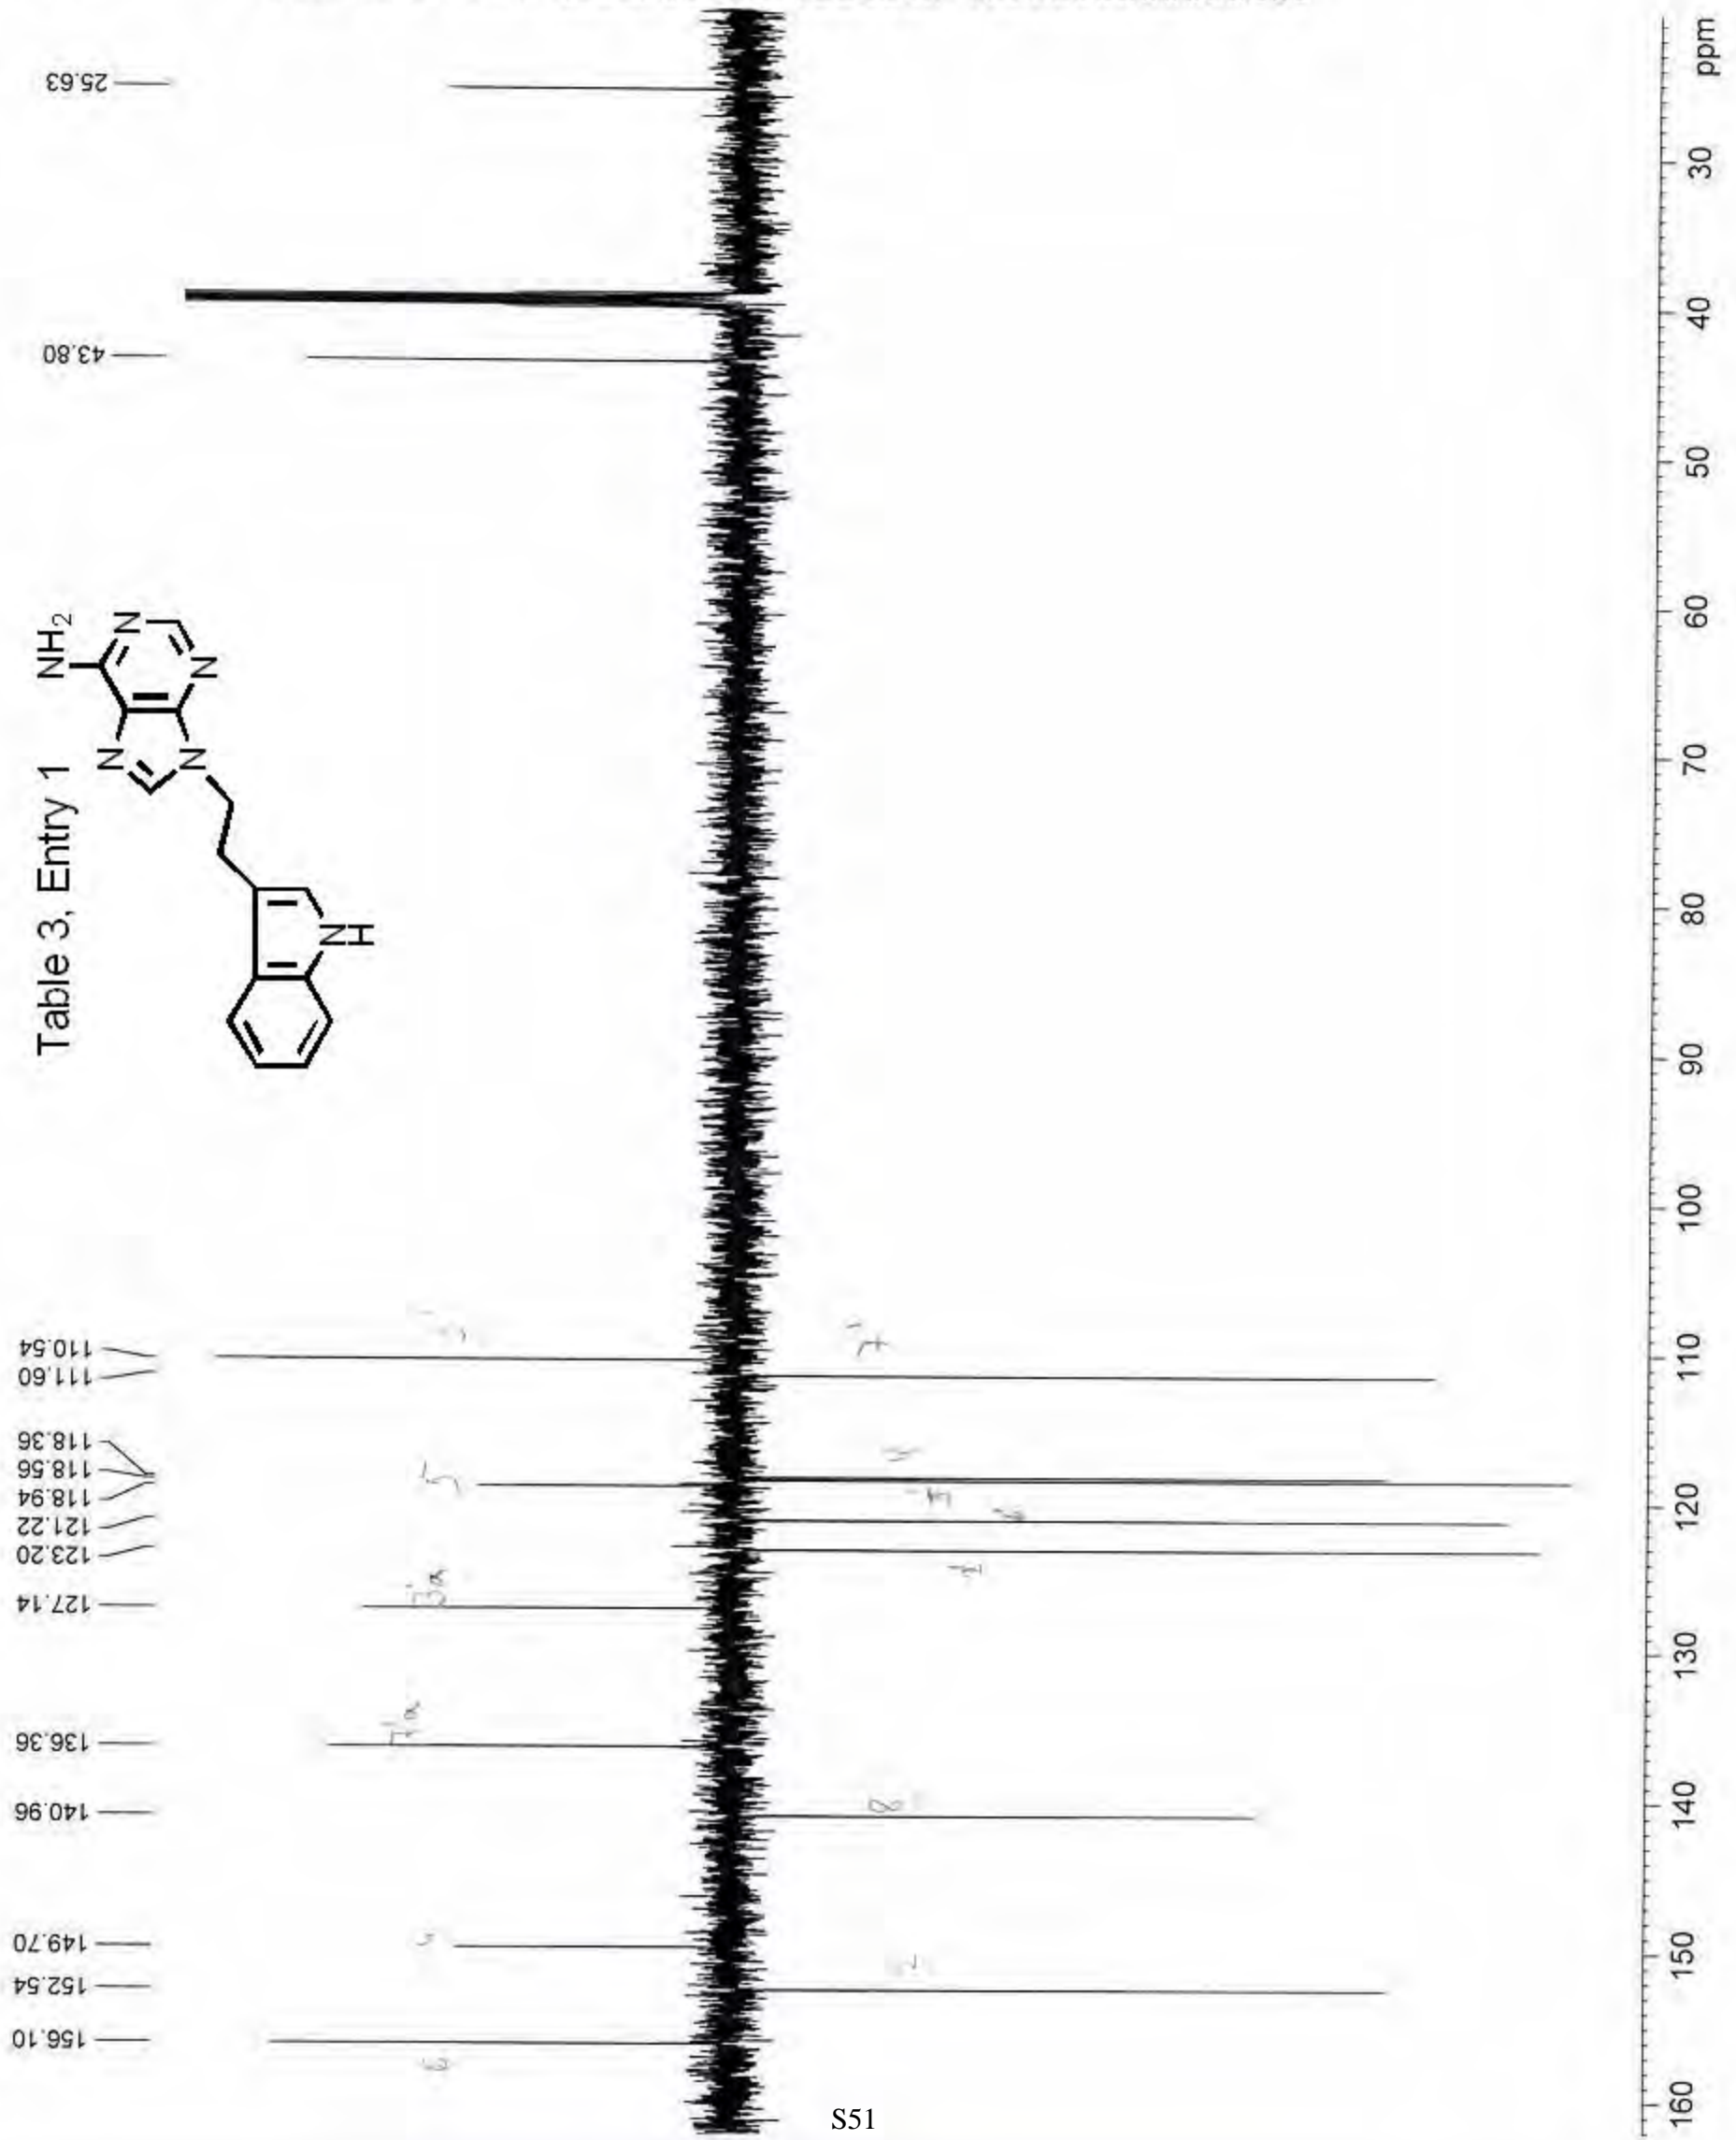

10.84

8.28  
8.00  
7.80  
7.79

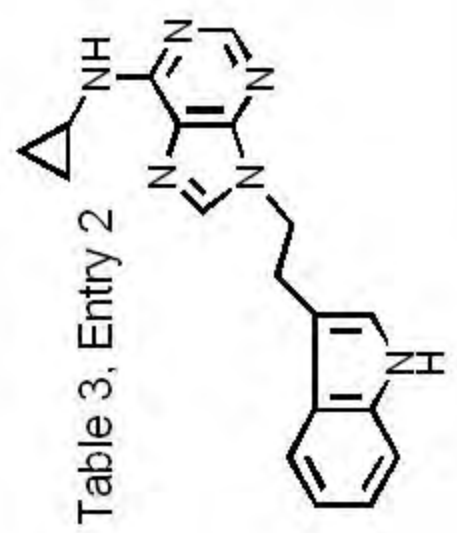

Dejmek\_MD378  
1H NMR in DMSO  
6-12-11 DR  
\*\*\*\*\*

NAME Dejmek\_MD378  
EXPNO 1  
PROCNO 1  
Date\_ 20111206  
Time 15.25  
INSTRUM spect  
PROBHD 5 mm TXI 1H-13  
PULPROG zg30  
TD 60094  
SOLVENT DMSO  
NS 32  
DS 0  
SWH 7507.507 Hz  
FIDRES 0.124929 Hz  
AQ 4.0023770 sec  
RG 14.3  
DW 66.600 usec  
DE 6.00 usec  
TE 300.0 K  
D1 1.00000000 sec  
TD0 1

S52

==== CHANNEL f1 =====  
NUC1 1H  
P1 8.00 usec  
PL1 0.00 dB  
PL1W 8.54041386 W  
SFO1 499.9534997 MHz  
SI 131072  
SF 499.9499979 MHz  
WDW no  
SSB 0  
LB 0.00 Hz  
GB 0  
PC 1.00

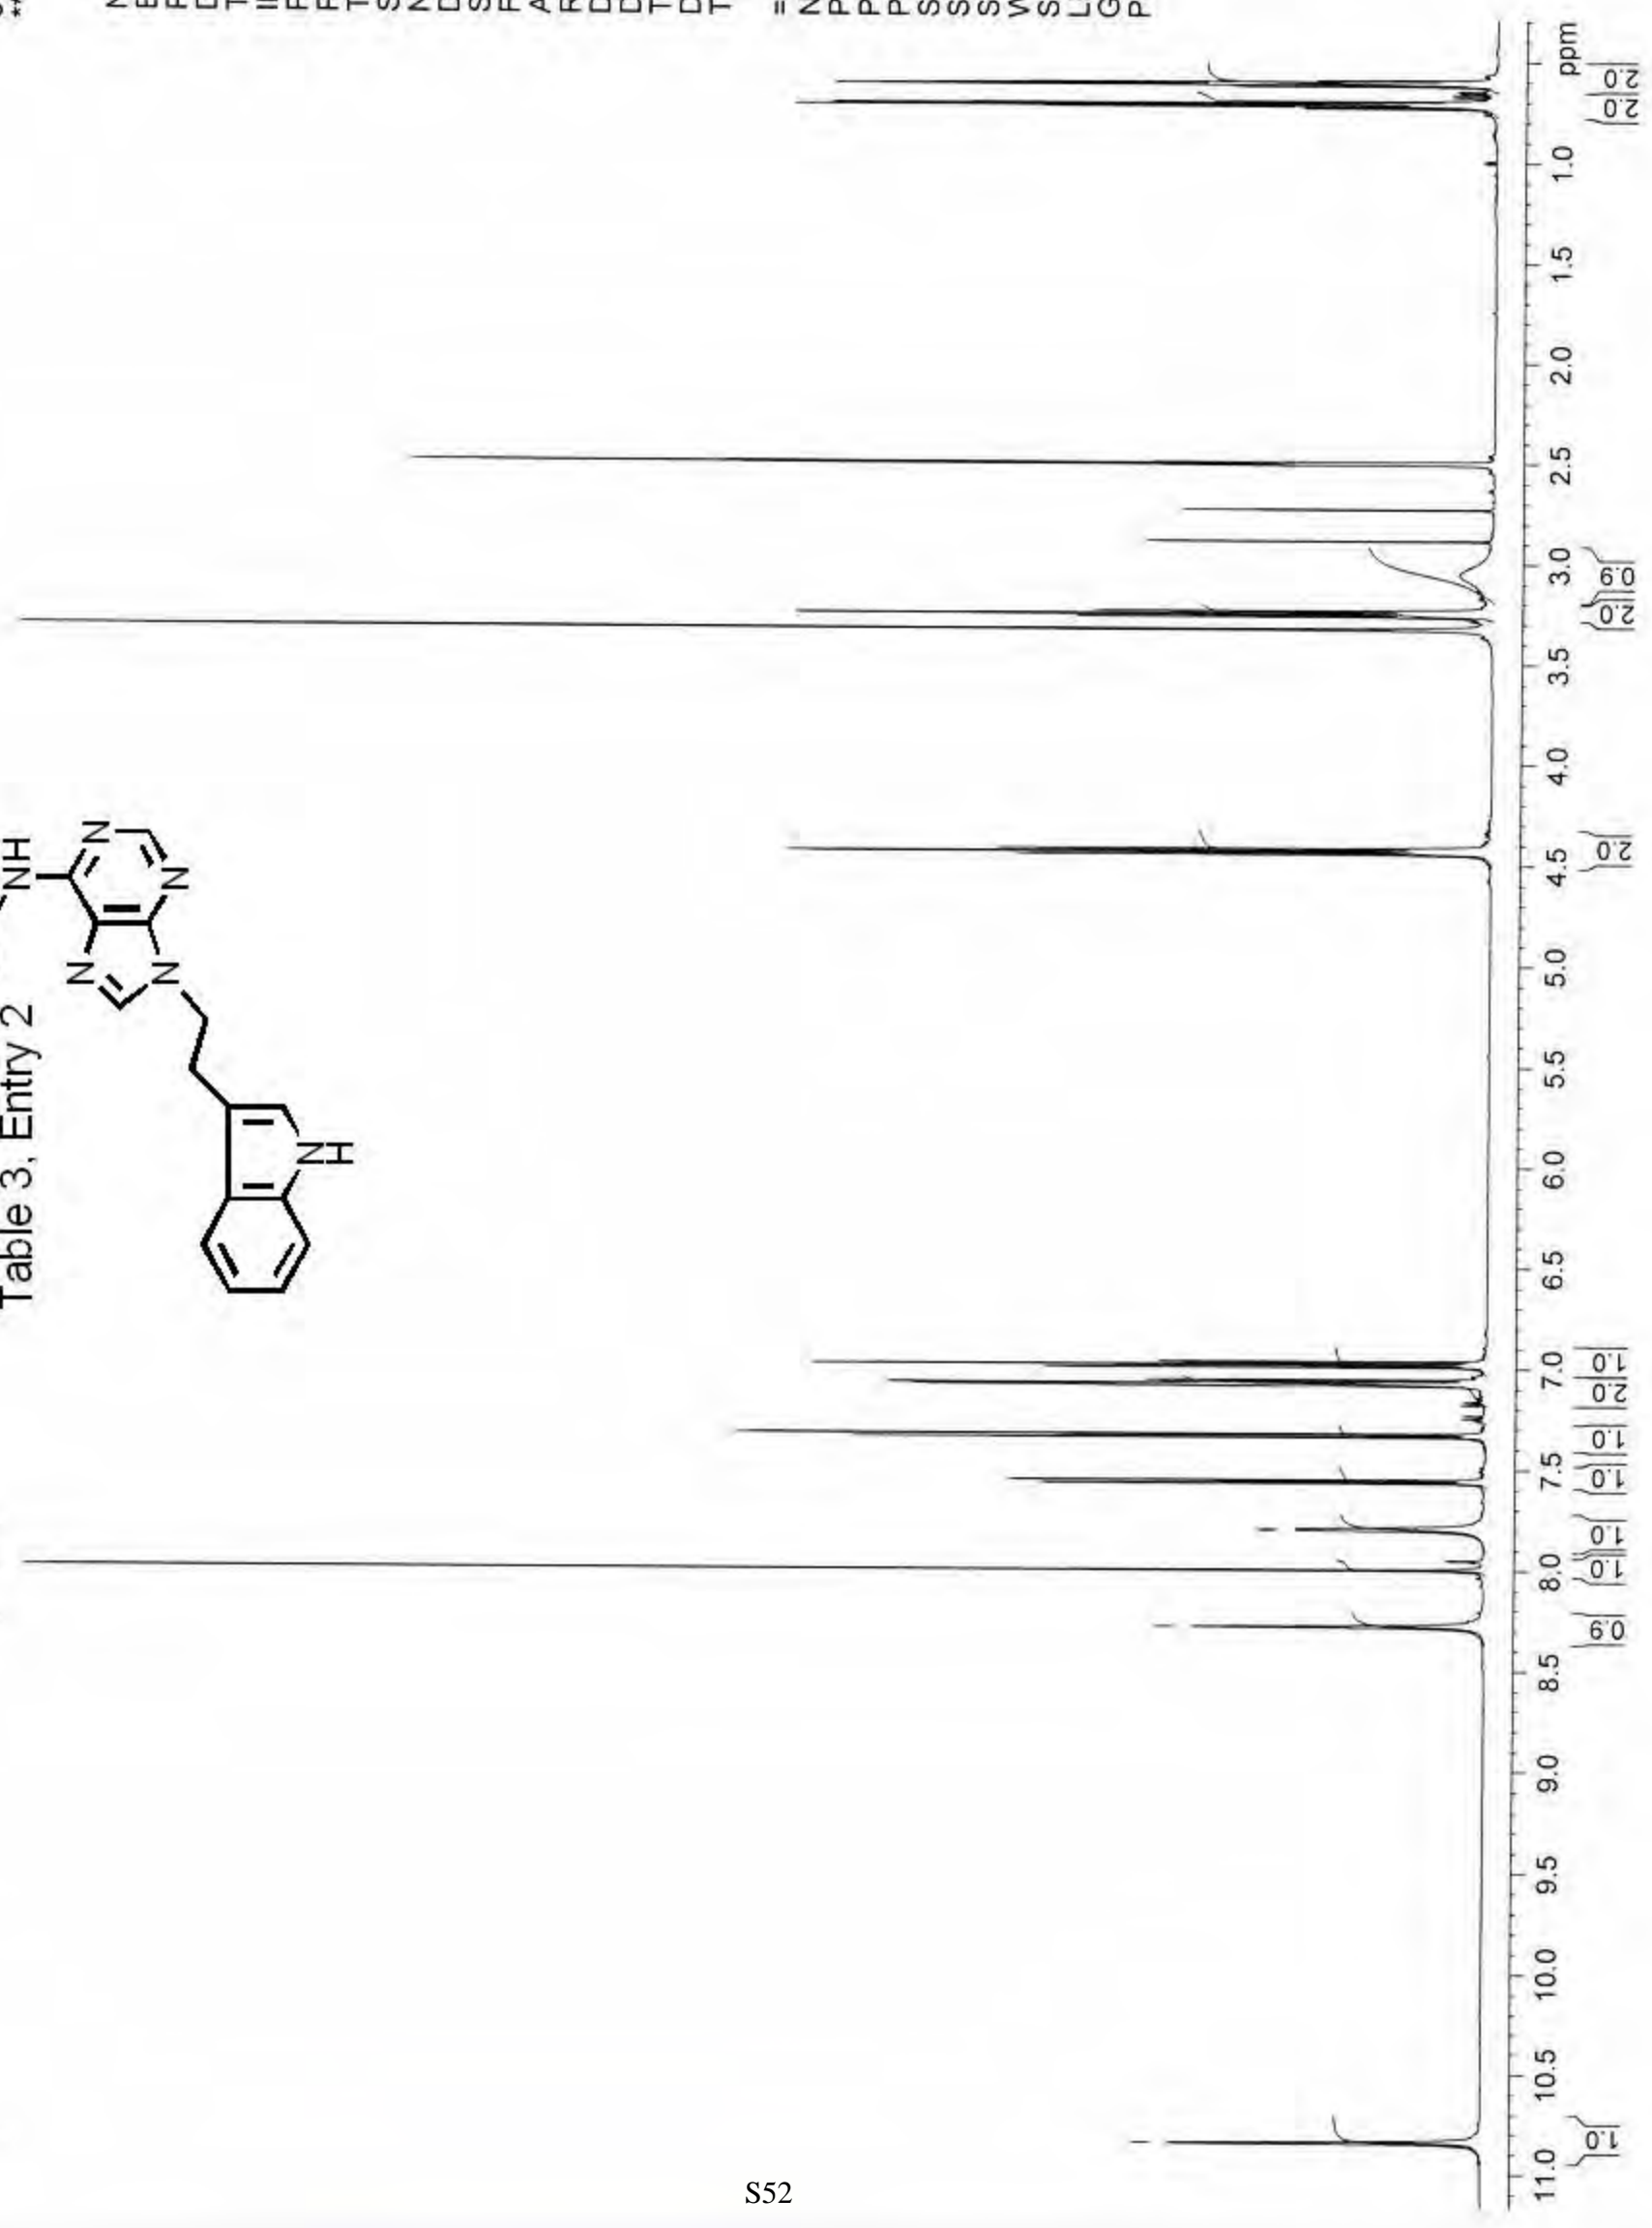

Dejmek\_MD378  
 APT in DMSO  
 6-12-11 DR  
 \*\*\*\*\*

NAME Dejmek\_MD378  
 EXPNO 2  
 PROCNO 1  
 Date\_ 20111206  
 Time 15.41  
 INSTRUM spect  
 PROBHD 5 mm TXI 1H-13  
 PULPROG jmod  
 TD 65536  
 SOLVENT DMSO  
 NS 1271  
 DS 4  
 SWH 30030.029 Hz  
 FIDRES 0.458222 Hz  
 AQ 1.0912410 sec  
 RG 29193  
 DW 16.650 usec  
 DE 6.50 usec  
 TE 300.0 K  
 CNST2 165.0000000  
 CNST11 1.0000000  
 D1 2.00000000 sec  
 D20 0.00606061 sec  
 TDO 1

==== CHANNEL f1 =====  
 NUC1 13C  
 P1 14.75 usec  
 P2 29.50 usec  
 PL1 0.00 dB  
 PL1W 67.82093048 W  
 SFO1 125.7263554 MHz

==== CHANNEL f2 =====  
 CPDPRG2 waltz16  
 NUC2 1H  
 PCPD2 60.00 usec  
 PL2 0.00 dB  
 PL12 17.50 dB  
 PL2W 8.54041386 W  
 PL12W 0.15187243 W  
 SFO2 499.9519998 MHz  
 SI 131072  
 SF 125.7125645 MHz  
 WDW EM  
 SSB 0  
 LB 1.00 Hz  
 GB 0  
 PC 1.00

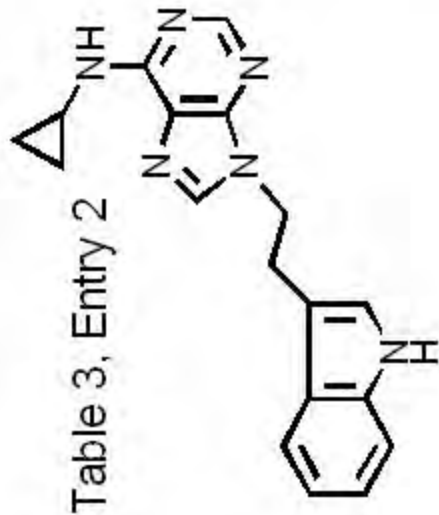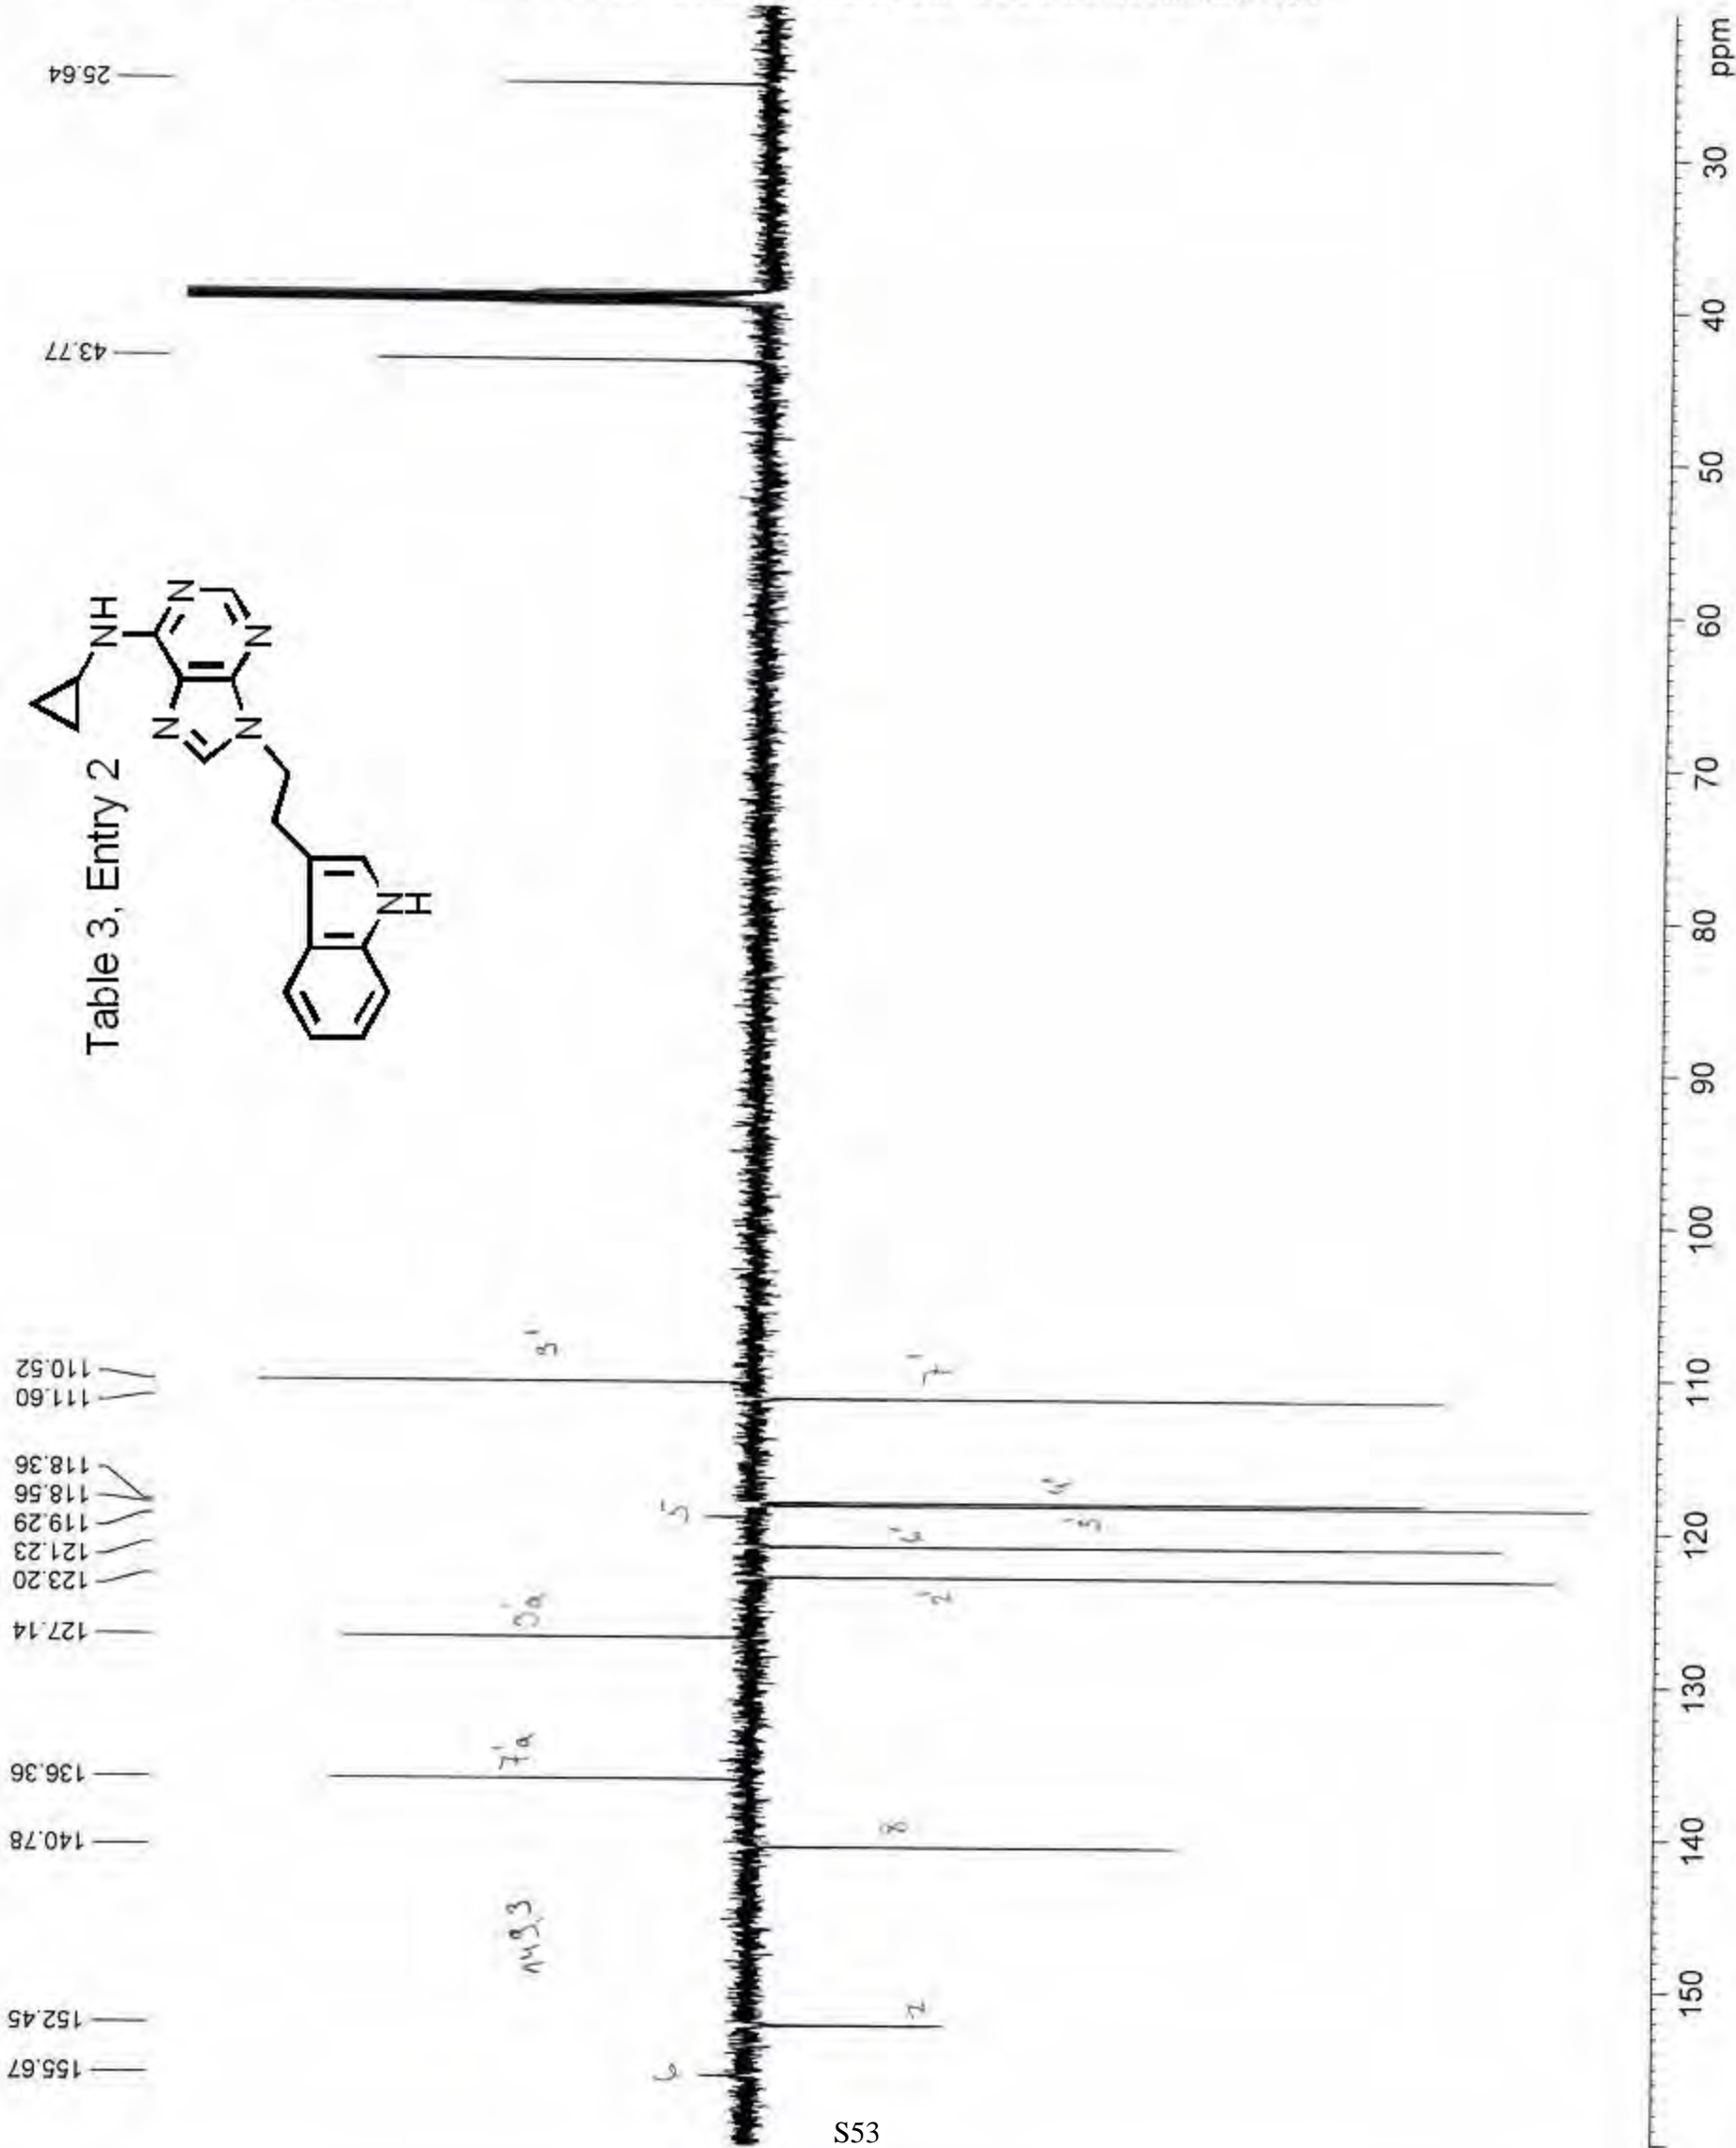

Dejmek\_MD380  
1H-NMR in DMSO  
2.12.2011 DR  
\*\*\*\*\*

Current Data Parameters  
NAME Dejmek\_MD380  
EXPNO 1  
PROCNO 1

F2 - Acquisition Parameters  
Date\_ 20111202  
Time 8.28  
INSTRUM spect  
PROBHD 5 mm BBI 1H/0-  
PULPROG zg30  
TD 7214  
F2 7214  
SOLVENT DMSO  
NS 32  
DS 0  
SWH 9014.423 Hz  
FIDRES 0.125002 Hz  
AQ 3.9999733 sec  
RG 9  
DN 55.467 usec  
DE 20.00 usec  
TE 300.0 K  
D1 1.00000000 sec  
TD0 1

===== CHANNEL f1 =====  
NUC1 1H  
P1 11.95 usec  
PL 2.33 dB  
PL1W 19.9735792 W  
SFO1 600.1342009 MHz

F2 - Processing parameters  
SI 131072  
SF 600.1300067 MHz  
WDW nc  
SSB 0  
LB 0.00 Hz  
GB 0  
PC 0.50

Table 3, Entry 3

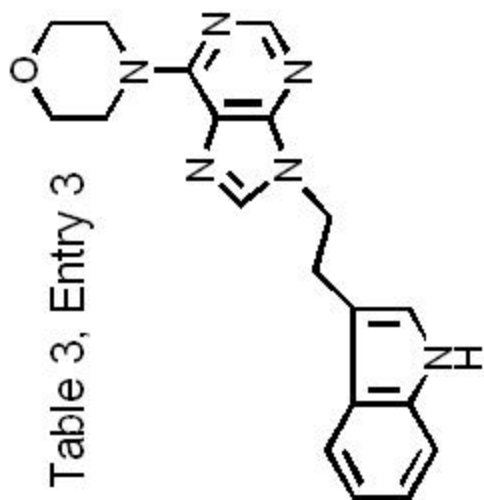

4.19

8.06

8.30

10.84

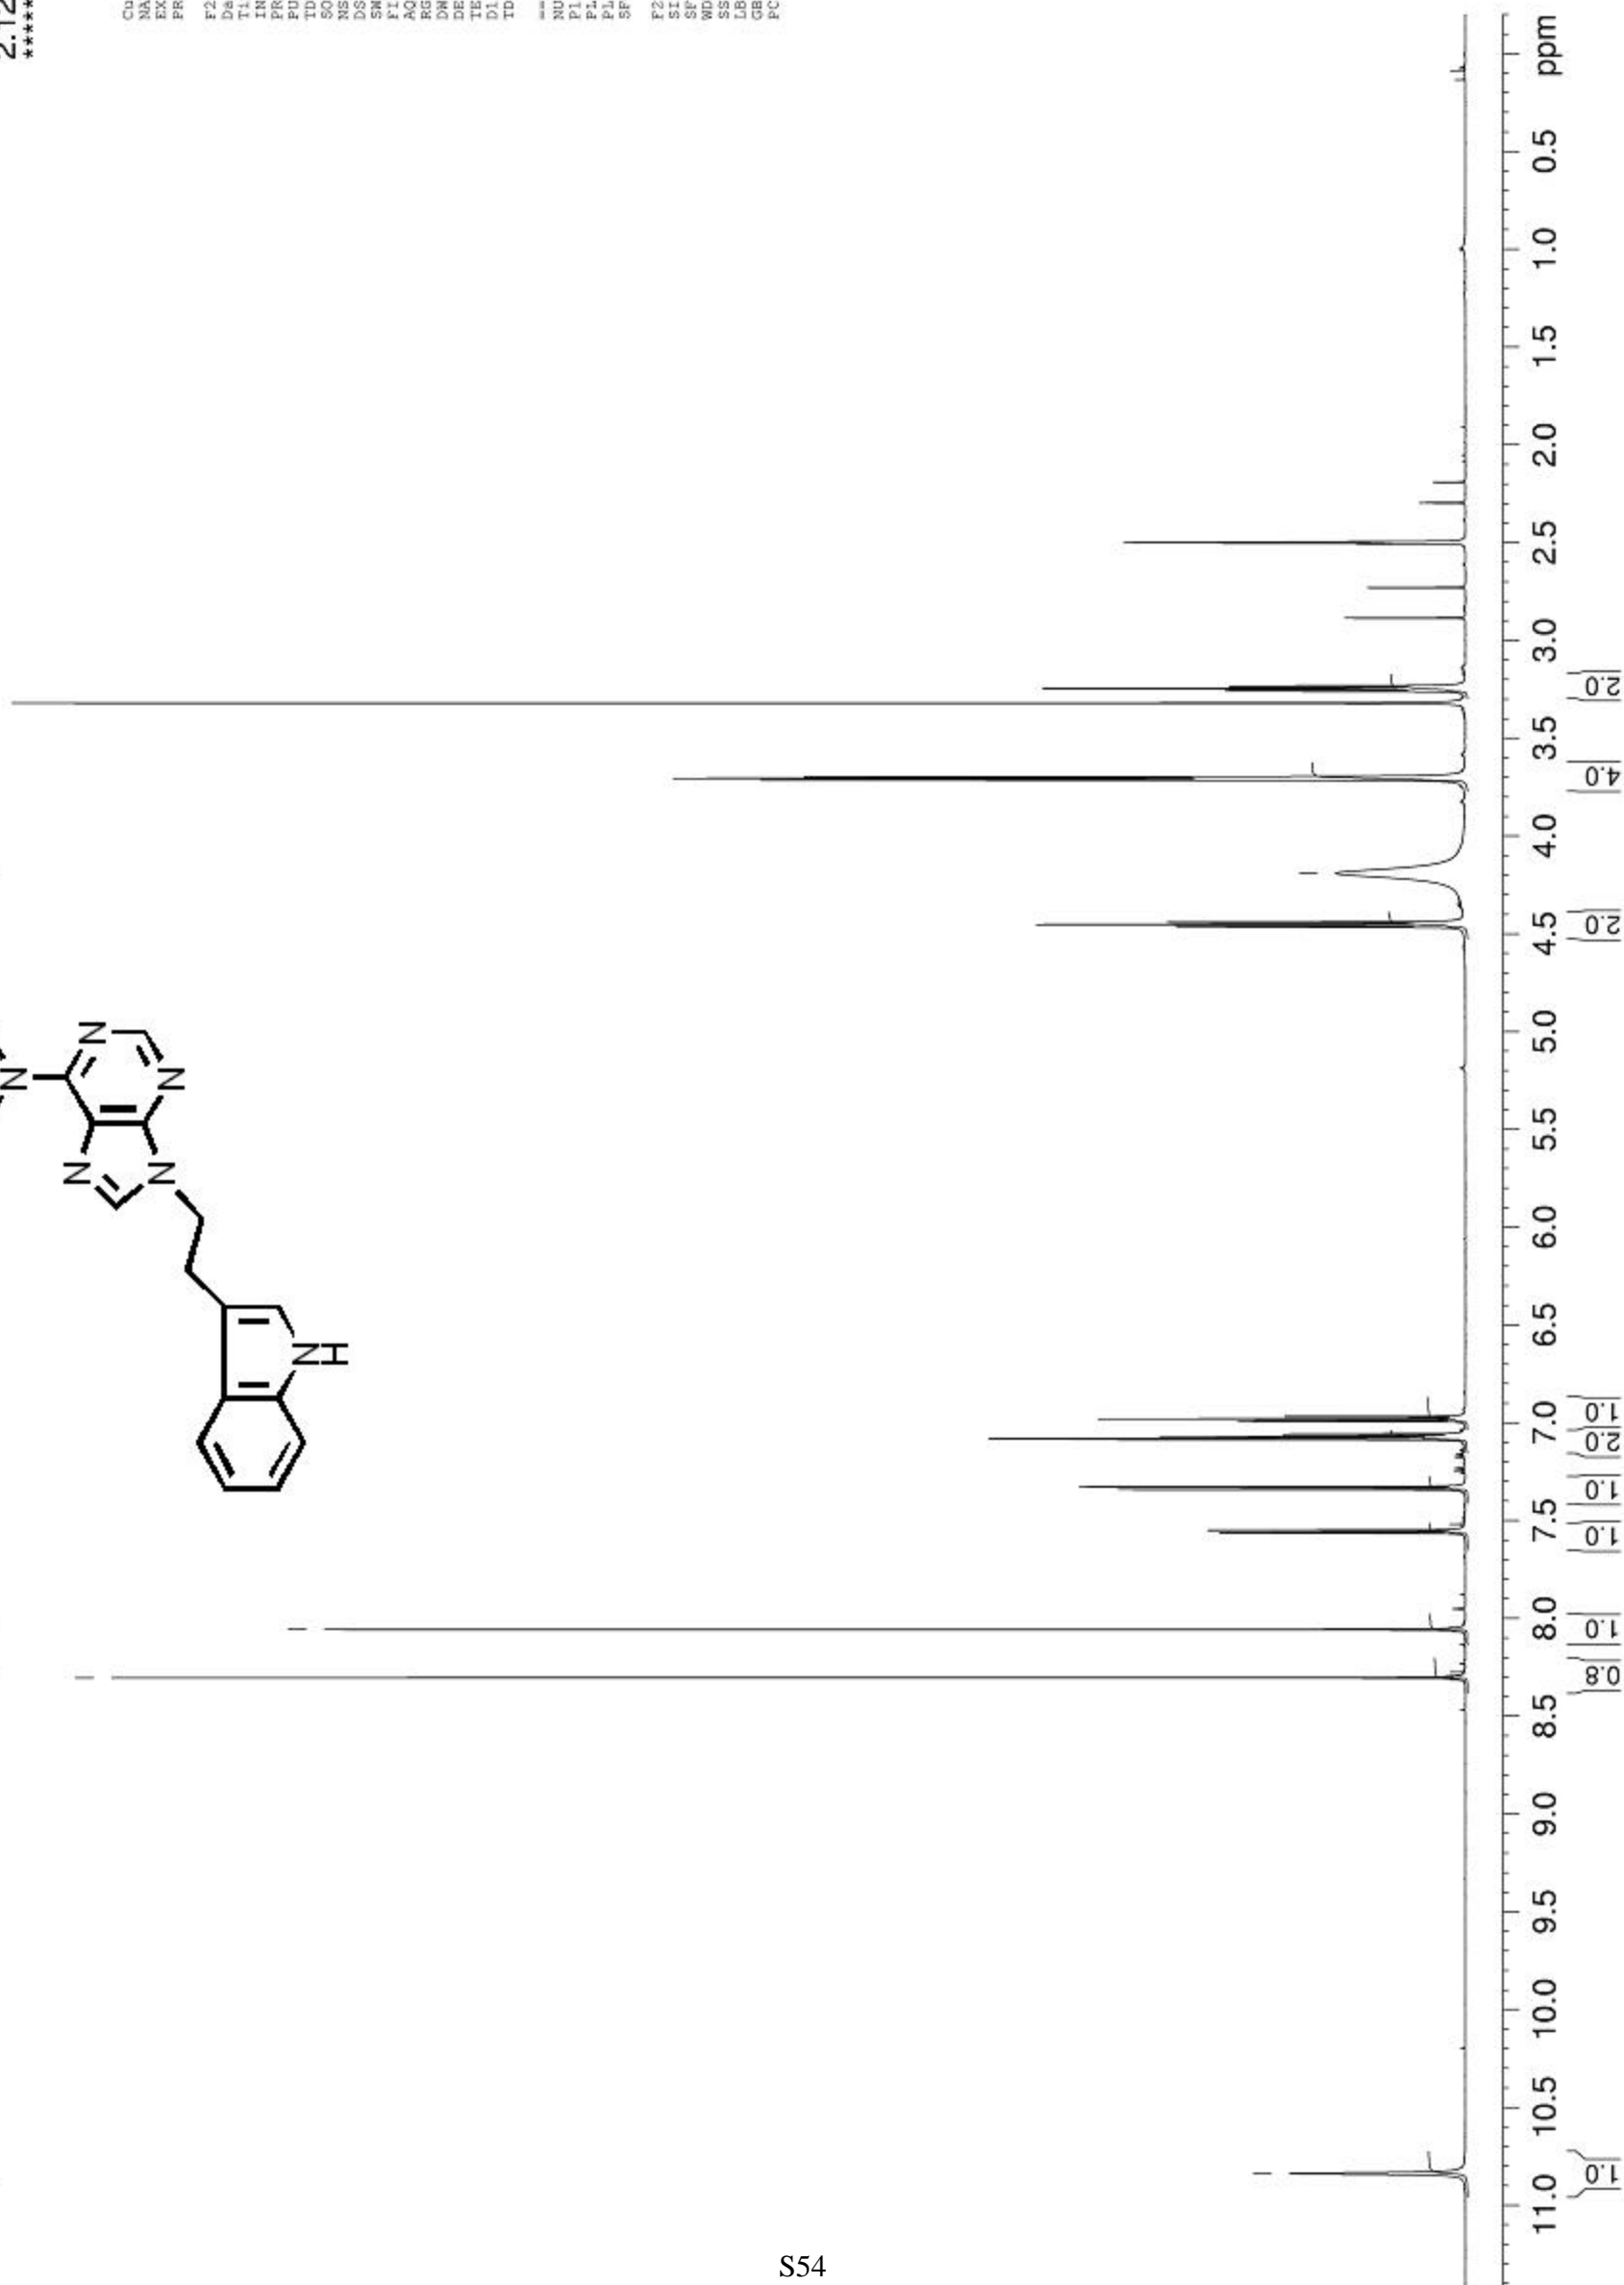

Dejmek\_MD380  
 APT in DMSO  
 2.12.2011 DR  
 \*\*\*\*\*

NAME Dejmek\_MD380  
 EXPNO 2  
 PROCNO 1  
 Date\_ 20111202  
 Time\_ 9.05  
 INSTRUM spect  
 PROBHD 5 mm BBI 1H/D-  
 PULPROG jmod  
 TD 75752  
 SOLVENT DMSO  
 NS 1450  
 DS 4  
 SWH 37878.789 H  
 FIDRES 0.500037 H  
 AQ 0.9999764 S  
 RG 16400  
 DW 13.200 u  
 DE 6.00 u  
 TE 300.0 K  
 CNST2 165.0000000  
 CNST11 1.0000000  
 D1 2.0000000 S  
 D20 0.00606061 S  
 TD0 1

==== CHANNEL f1 =====  
 NUC1 13C  
 P1 13.25 u  
 P2 26.50 u  
 PL1 -2.10 d  
 PL1W 126.28787994 W  
 SFO1 150.9194083 M

==== CHANNEL f2 =====  
 CPDPRG2 waltz16  
 NUC2 1H  
 PCPD2 80.00 u  
 PL2 2.33 d  
 PL12 18.84 d  
 PL2W 19.97739792 W  
 PL12W 0.44620958 W  
 SFO2 600.1324005 M  
 SI 131072  
 SF 150.9028607 M  
 WDW EM  
 SSB 0  
 LB 1.00 H  
 GB 0  
 PC 1.40

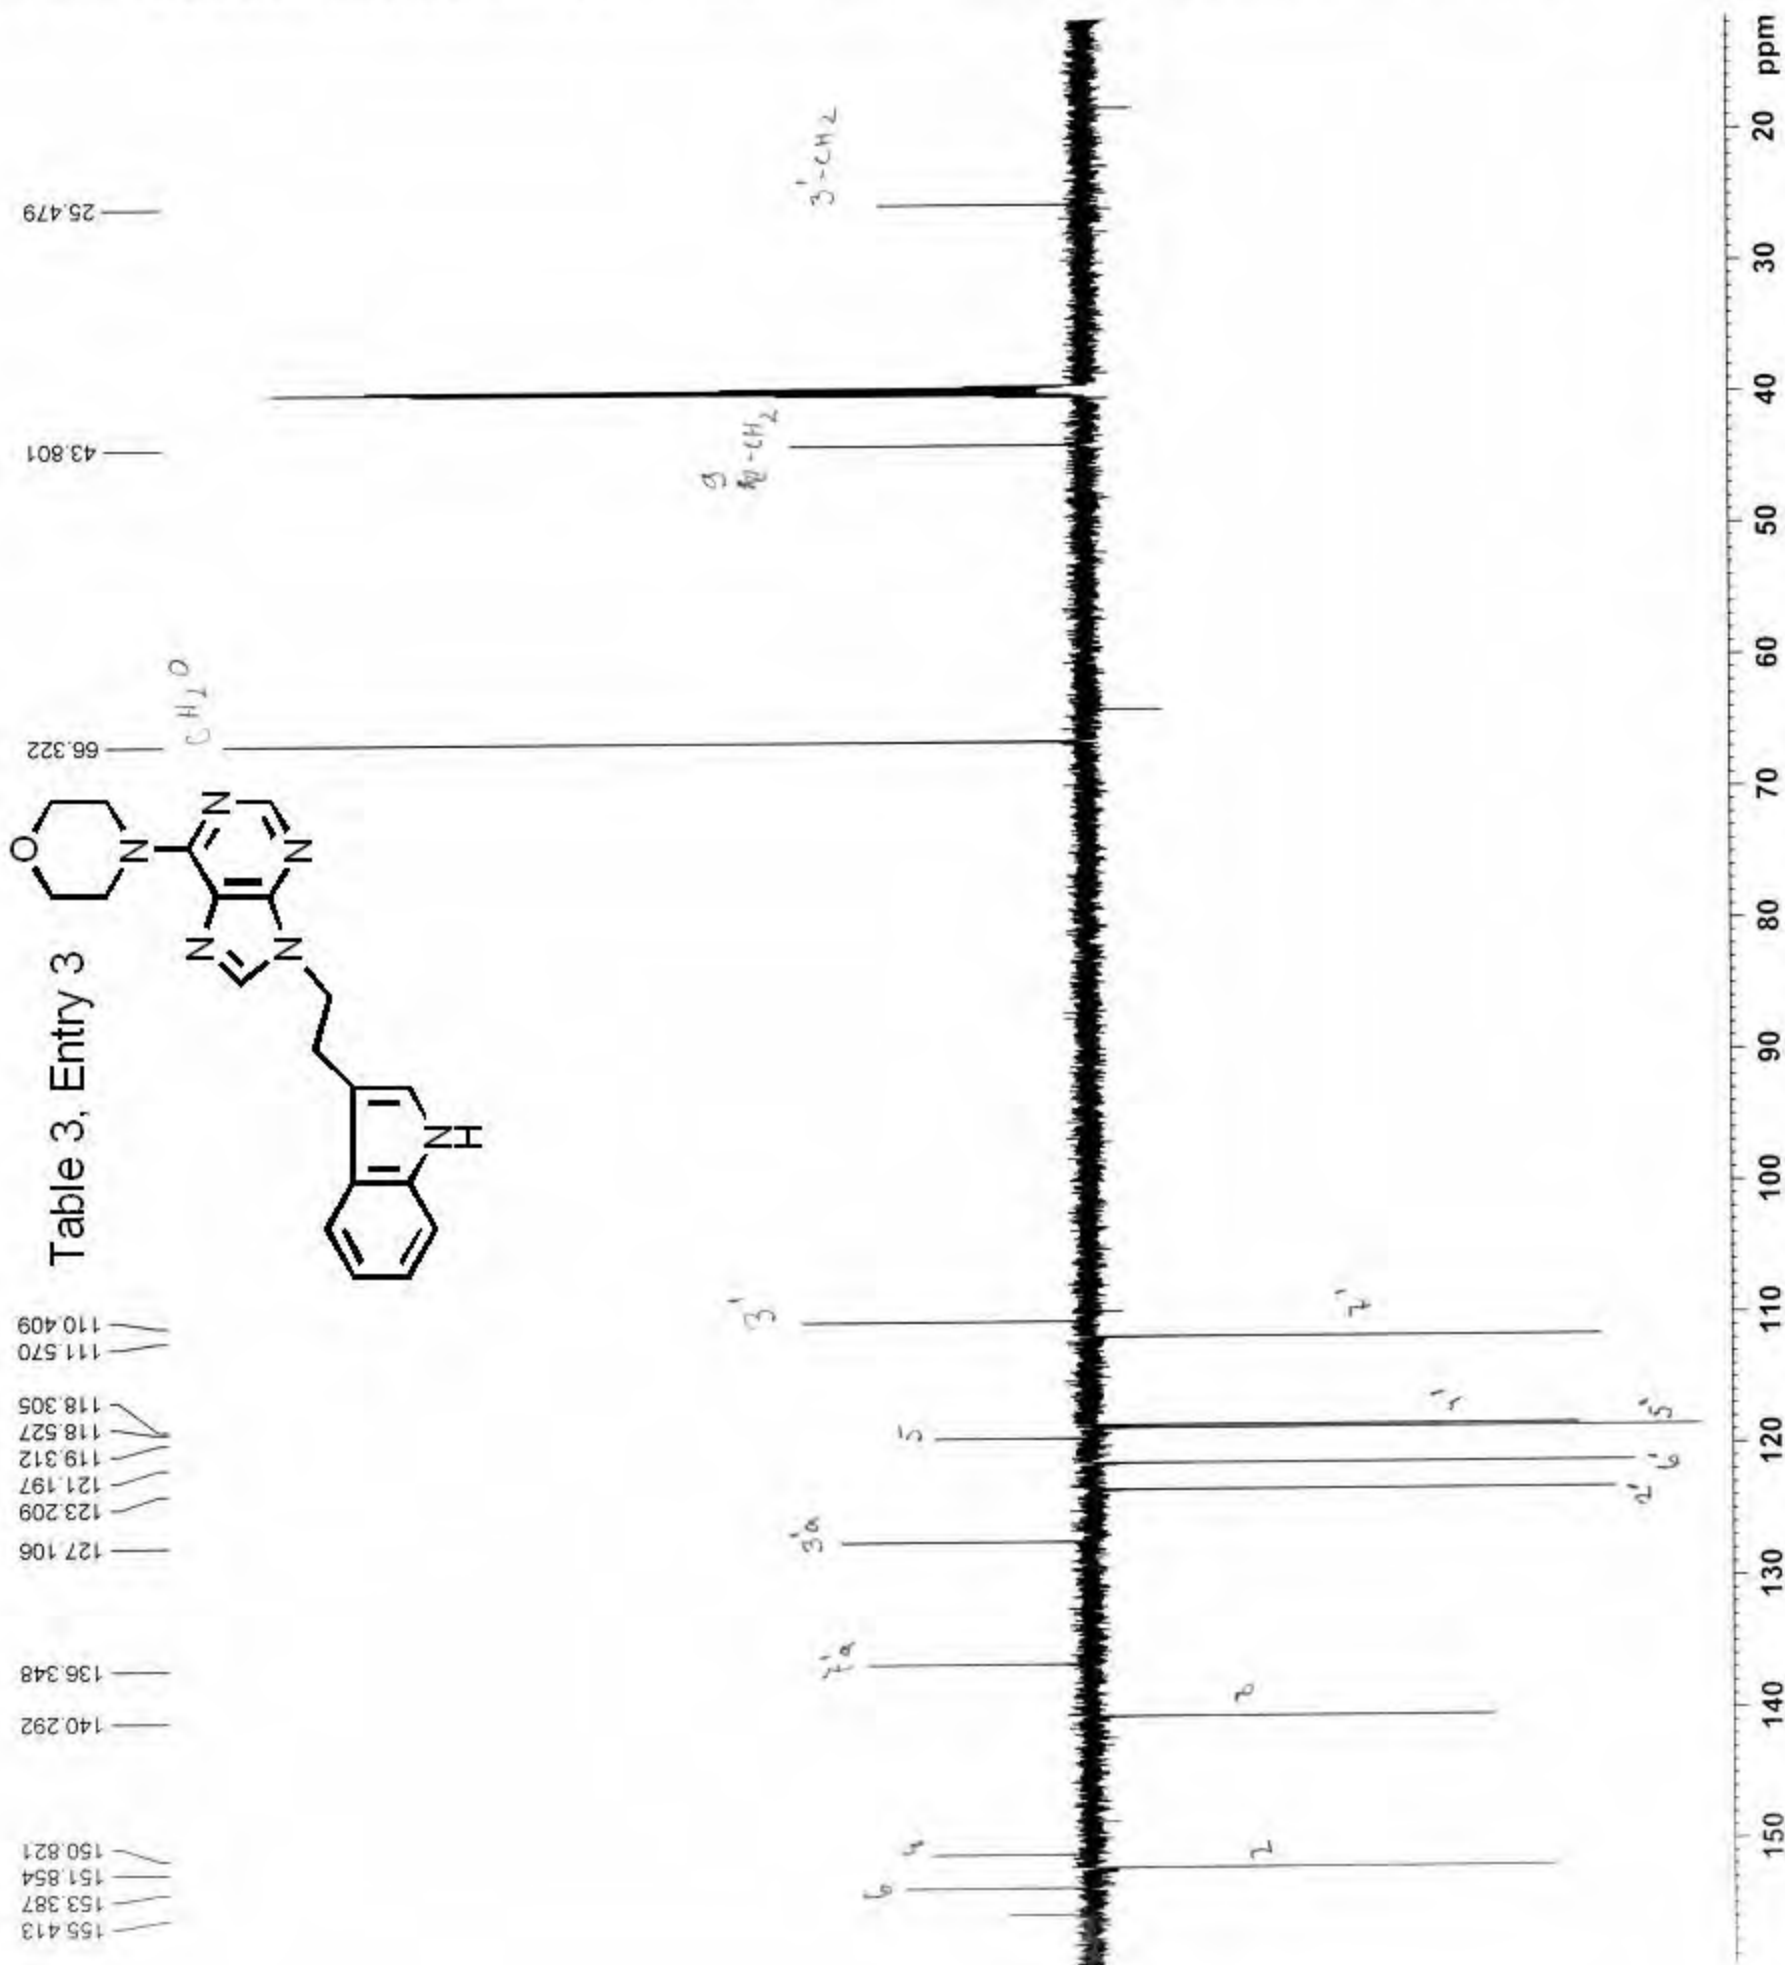

Table 3, Entry 4

Dejmek\_MD382  
 1H-NMR in DMSO  
 19.12.2011 DR  
 \*\*\*\*\*

```

Current Data Parameters
NAME      Dejmek_MD382
EXPNO    1
PROCNO   1

F2 - Acquisition Parameters
Date_     20111219
Time      14.35
INSTRUM   spect
PROBHD    5 mm BBI 1H/0-
PULPROG   zg30
TD         7214
SOLVENT   DMSO
NS         32
DS         0
SWH        9014.423 Hz
FIDRES     0.125002 Hz
AQ         3.9999733 sec
RG         9
DN         55.467 usec
DE         20.00 usec
TE         300.1 K
D1         1.00000000 sec
TD0        1

===== CHANNEL f1 =====
NUC1       1H
P1         11.95 usec
PL1        2.33 dB
PL1W       19.97739792 W
SFO1       600.1342009 MHz

F2 - Processing parameters
SI         131072
SF         600.1300067 MHz
WDW        nc
SSB        0
LB         0.00 Hz
GB         0
PC         0.50
    
```

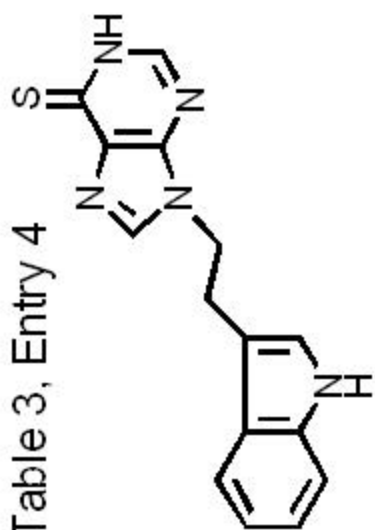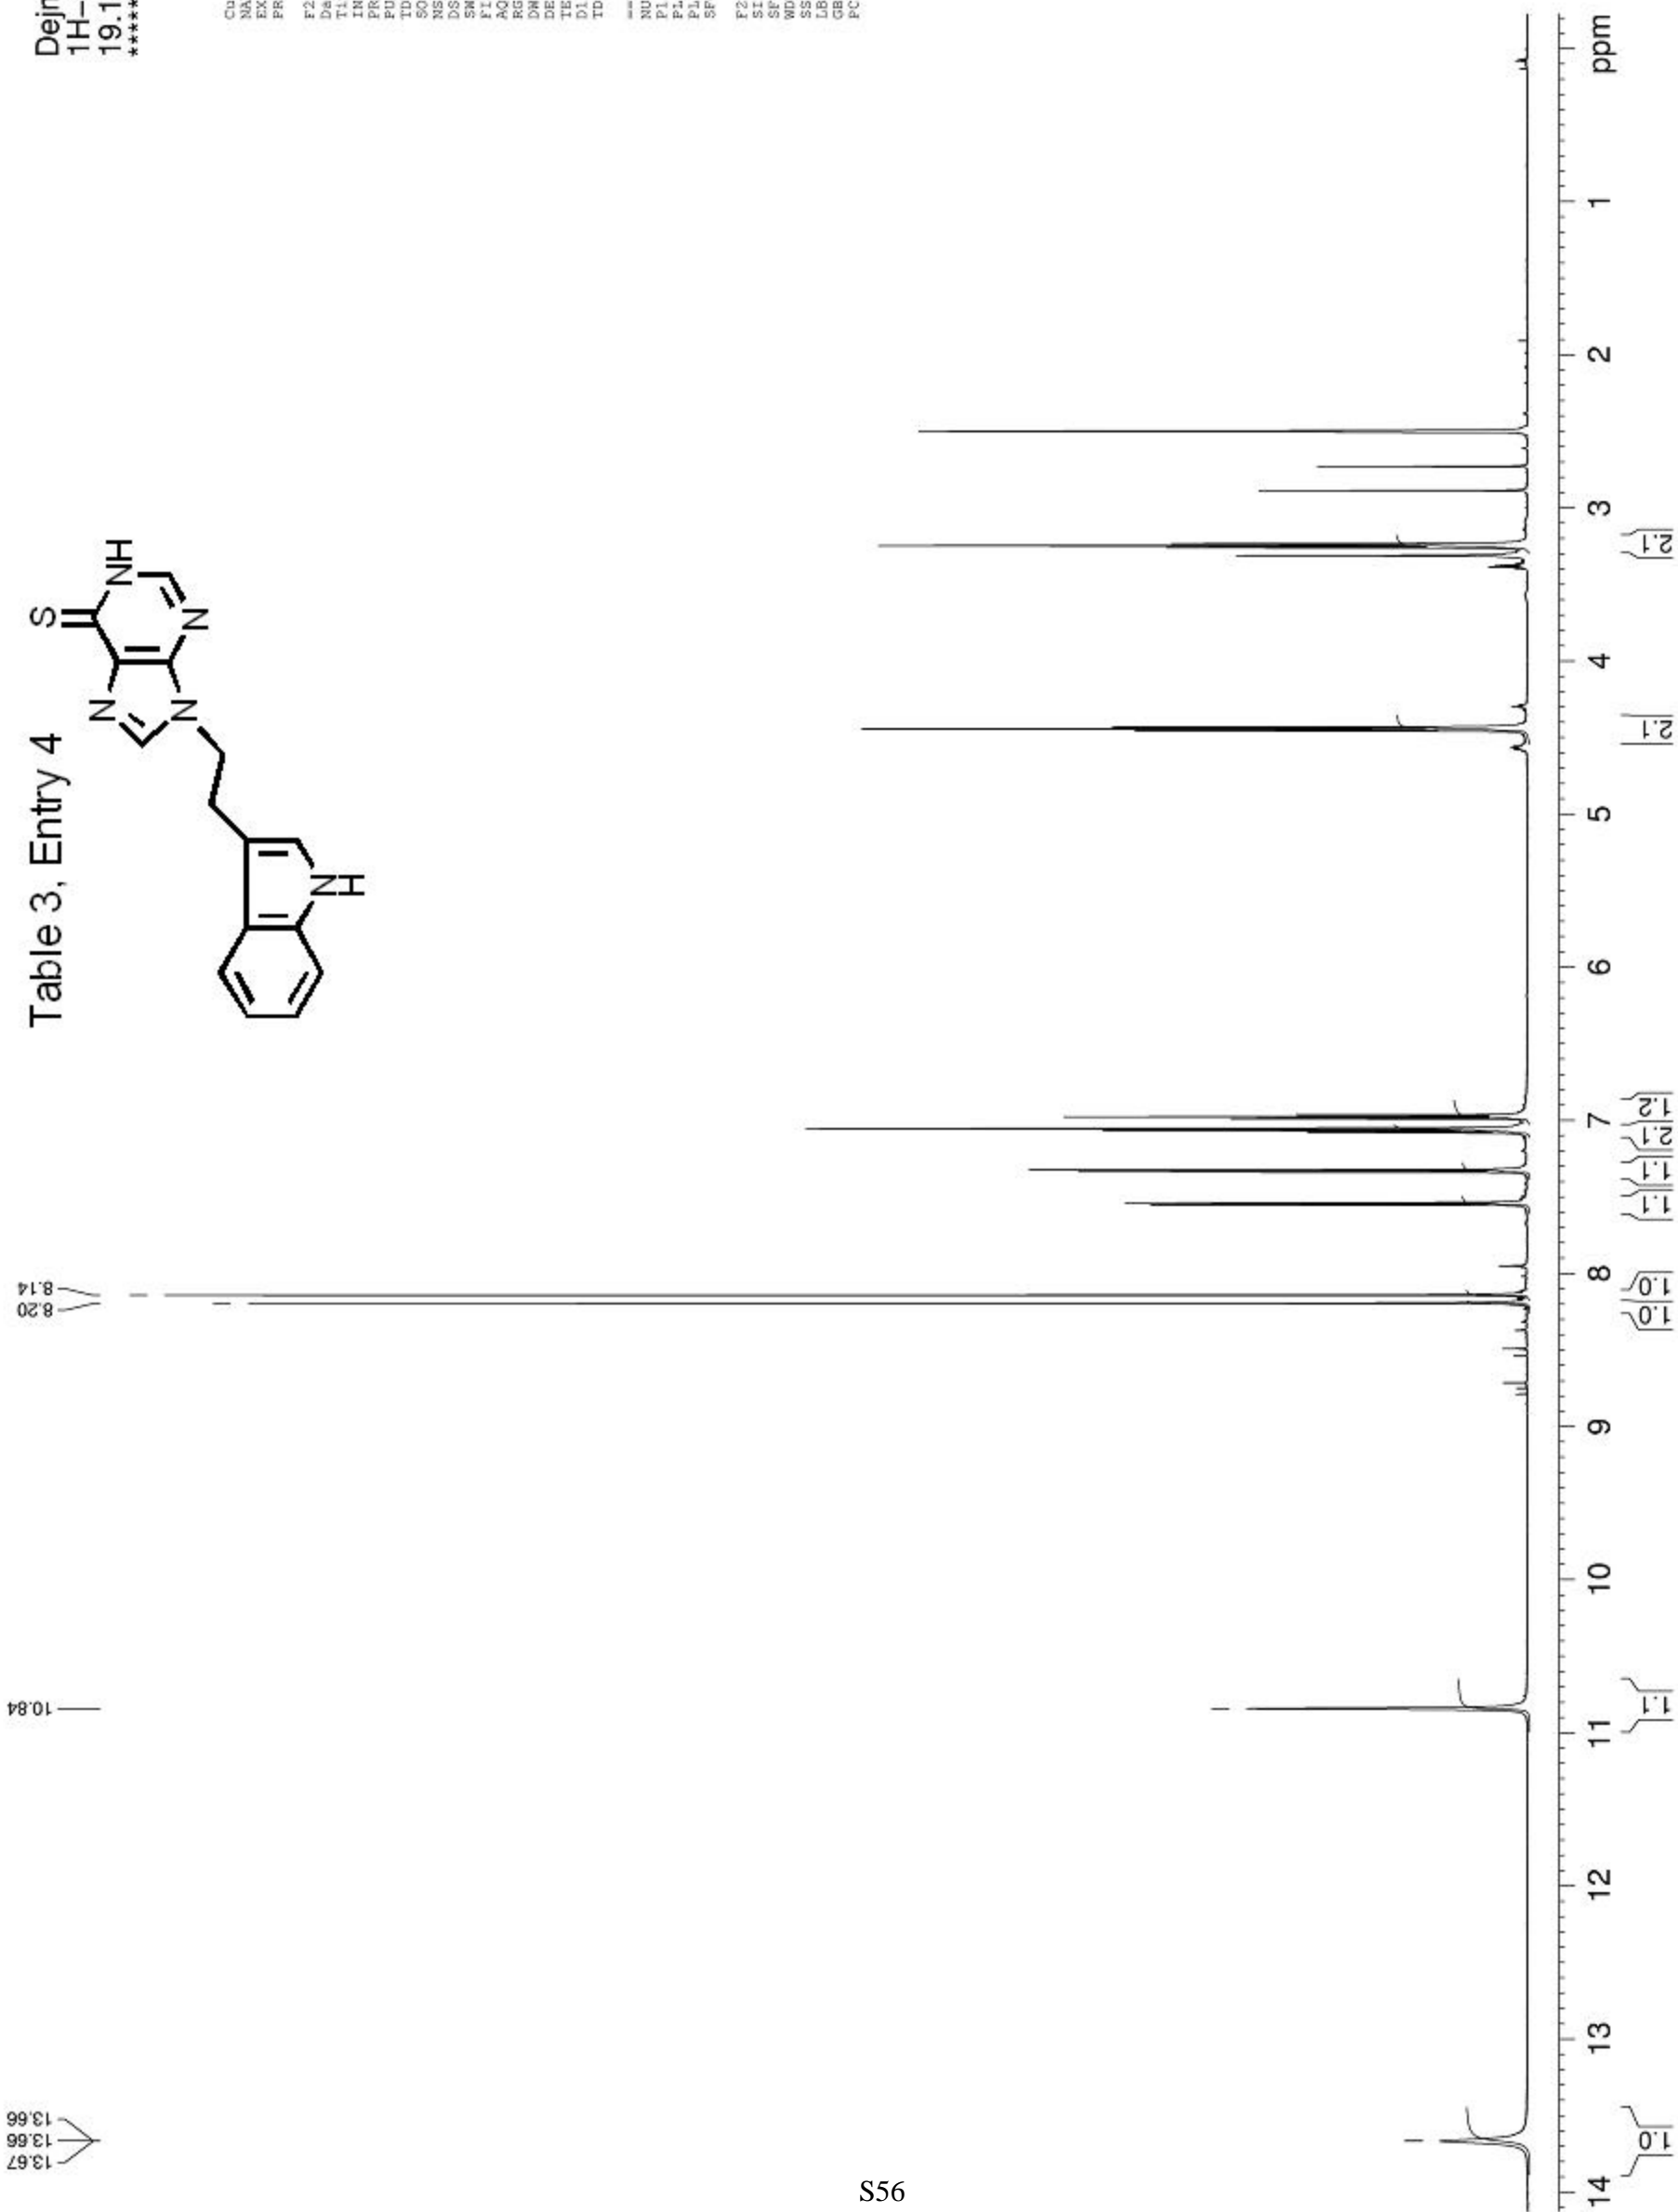



Dejmek\_MD382  
 APT in DMSO  
 19.12.2011 DR  
 \*\*\*\*\*

NAME Dejmek\_MD382  
 EXPNO 2  
 PROCNO 1  
 Date\_ 20111219  
 Time\_ 15.49  
 INSTRUM spect  
 PROBHD 5 mm BBI 1H/D-  
 PULPROG jmod  
 TD 75752  
 SOLVENT DMSO  
 NS 1461  
 DS 4  
 SWH 37878.789 H  
 FIDRES 0.500037 H  
 AQ 0.9999764 S  
 RG 16400  
 DW 13.200 u  
 DE 6.00 u  
 TE 300.0 K  
 CNST2 165.0000000  
 CNST11 1.0000000  
 D1 2.0000000 S  
 D20 0.00606061 S  
 TD0 1

==== CHANNEL f1 =====  
 NUC1 13C  
 P1 13.25 u  
 P2 26.50 u  
 PL1 -2.10 d  
 PL1W 126.28787994 W  
 SFO1 150.9194083 M

==== CHANNEL f2 =====  
 CPDPRG2 waltz16  
 NUC2 1H  
 PCPD2 80.00 u  
 PL2 2.33 d  
 PL12 18.84 d  
 PL2W 19.97739792 W  
 PL12W 0.44620958 W  
 SFO2 600.1324005 M  
 SI 131072  
 SF 150.9028619 M  
 WDW EM  
 SSB 0  
 LB 1.00 H  
 GB 0  
 FC 1.40

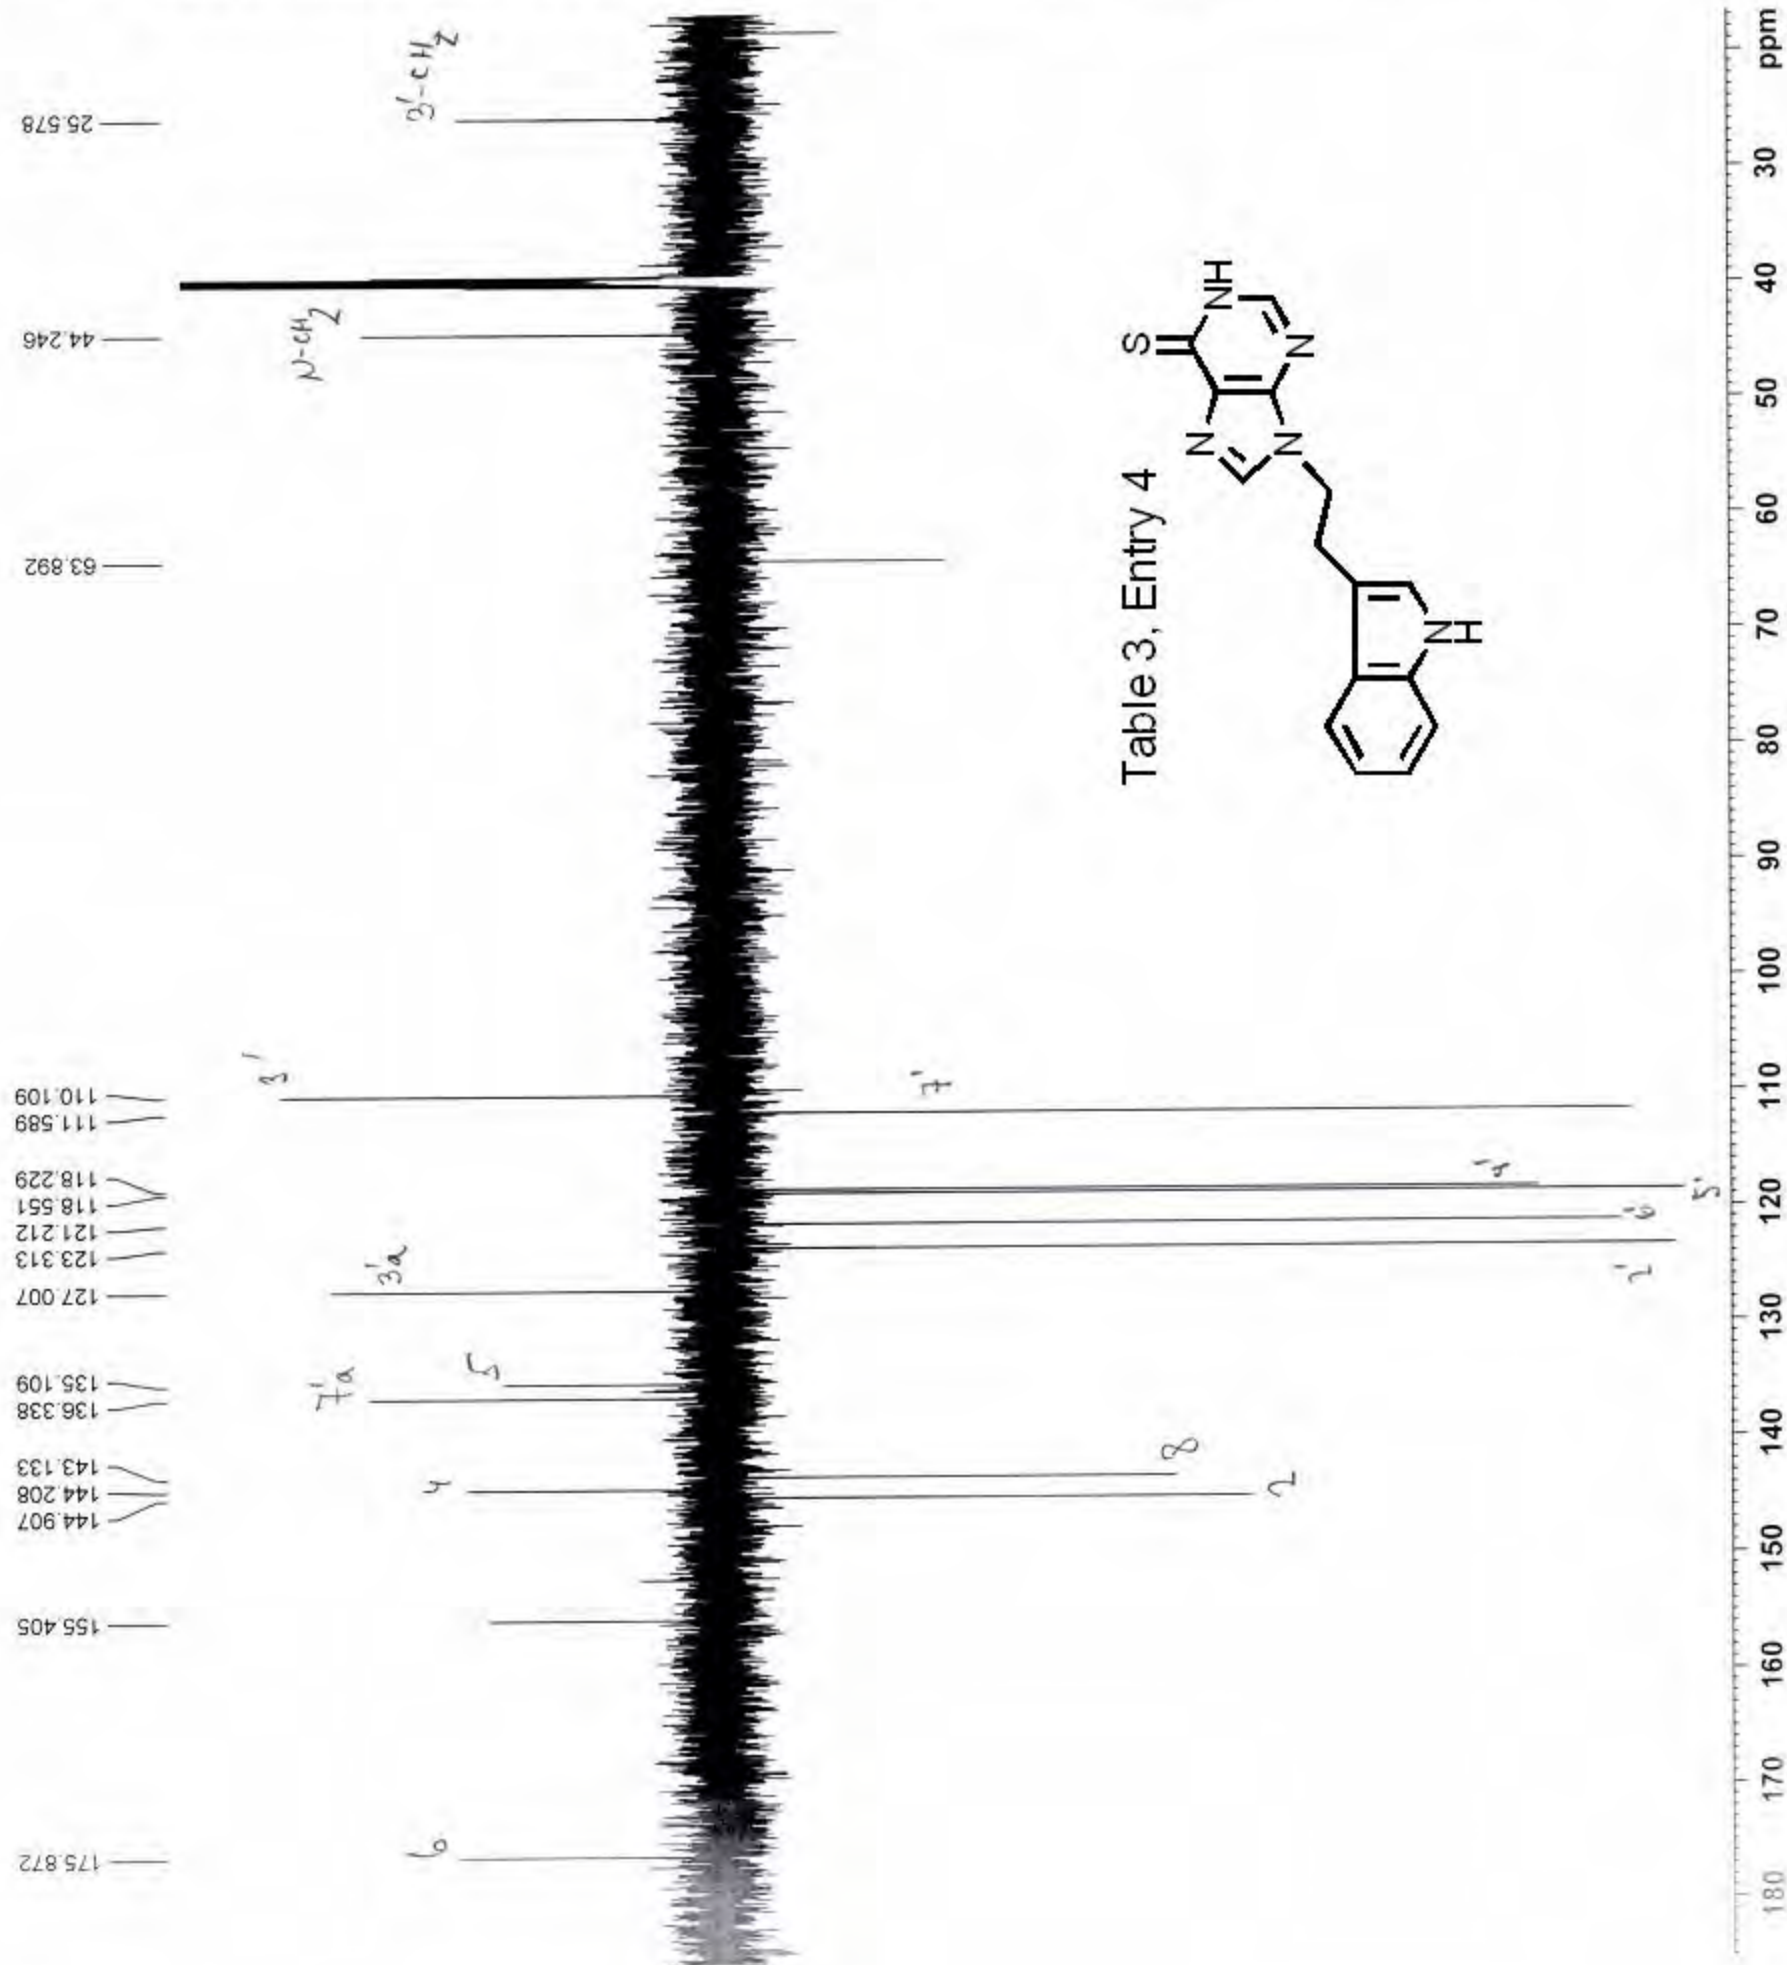

Table 3, Entry 4

Table 3, Entry 5

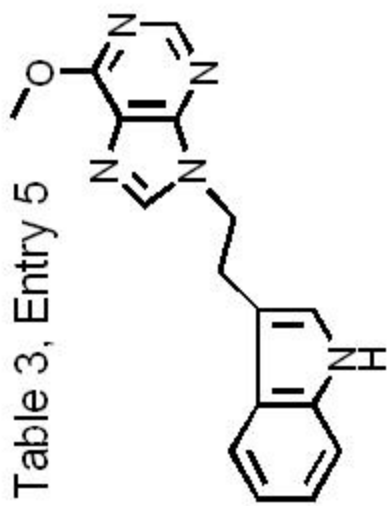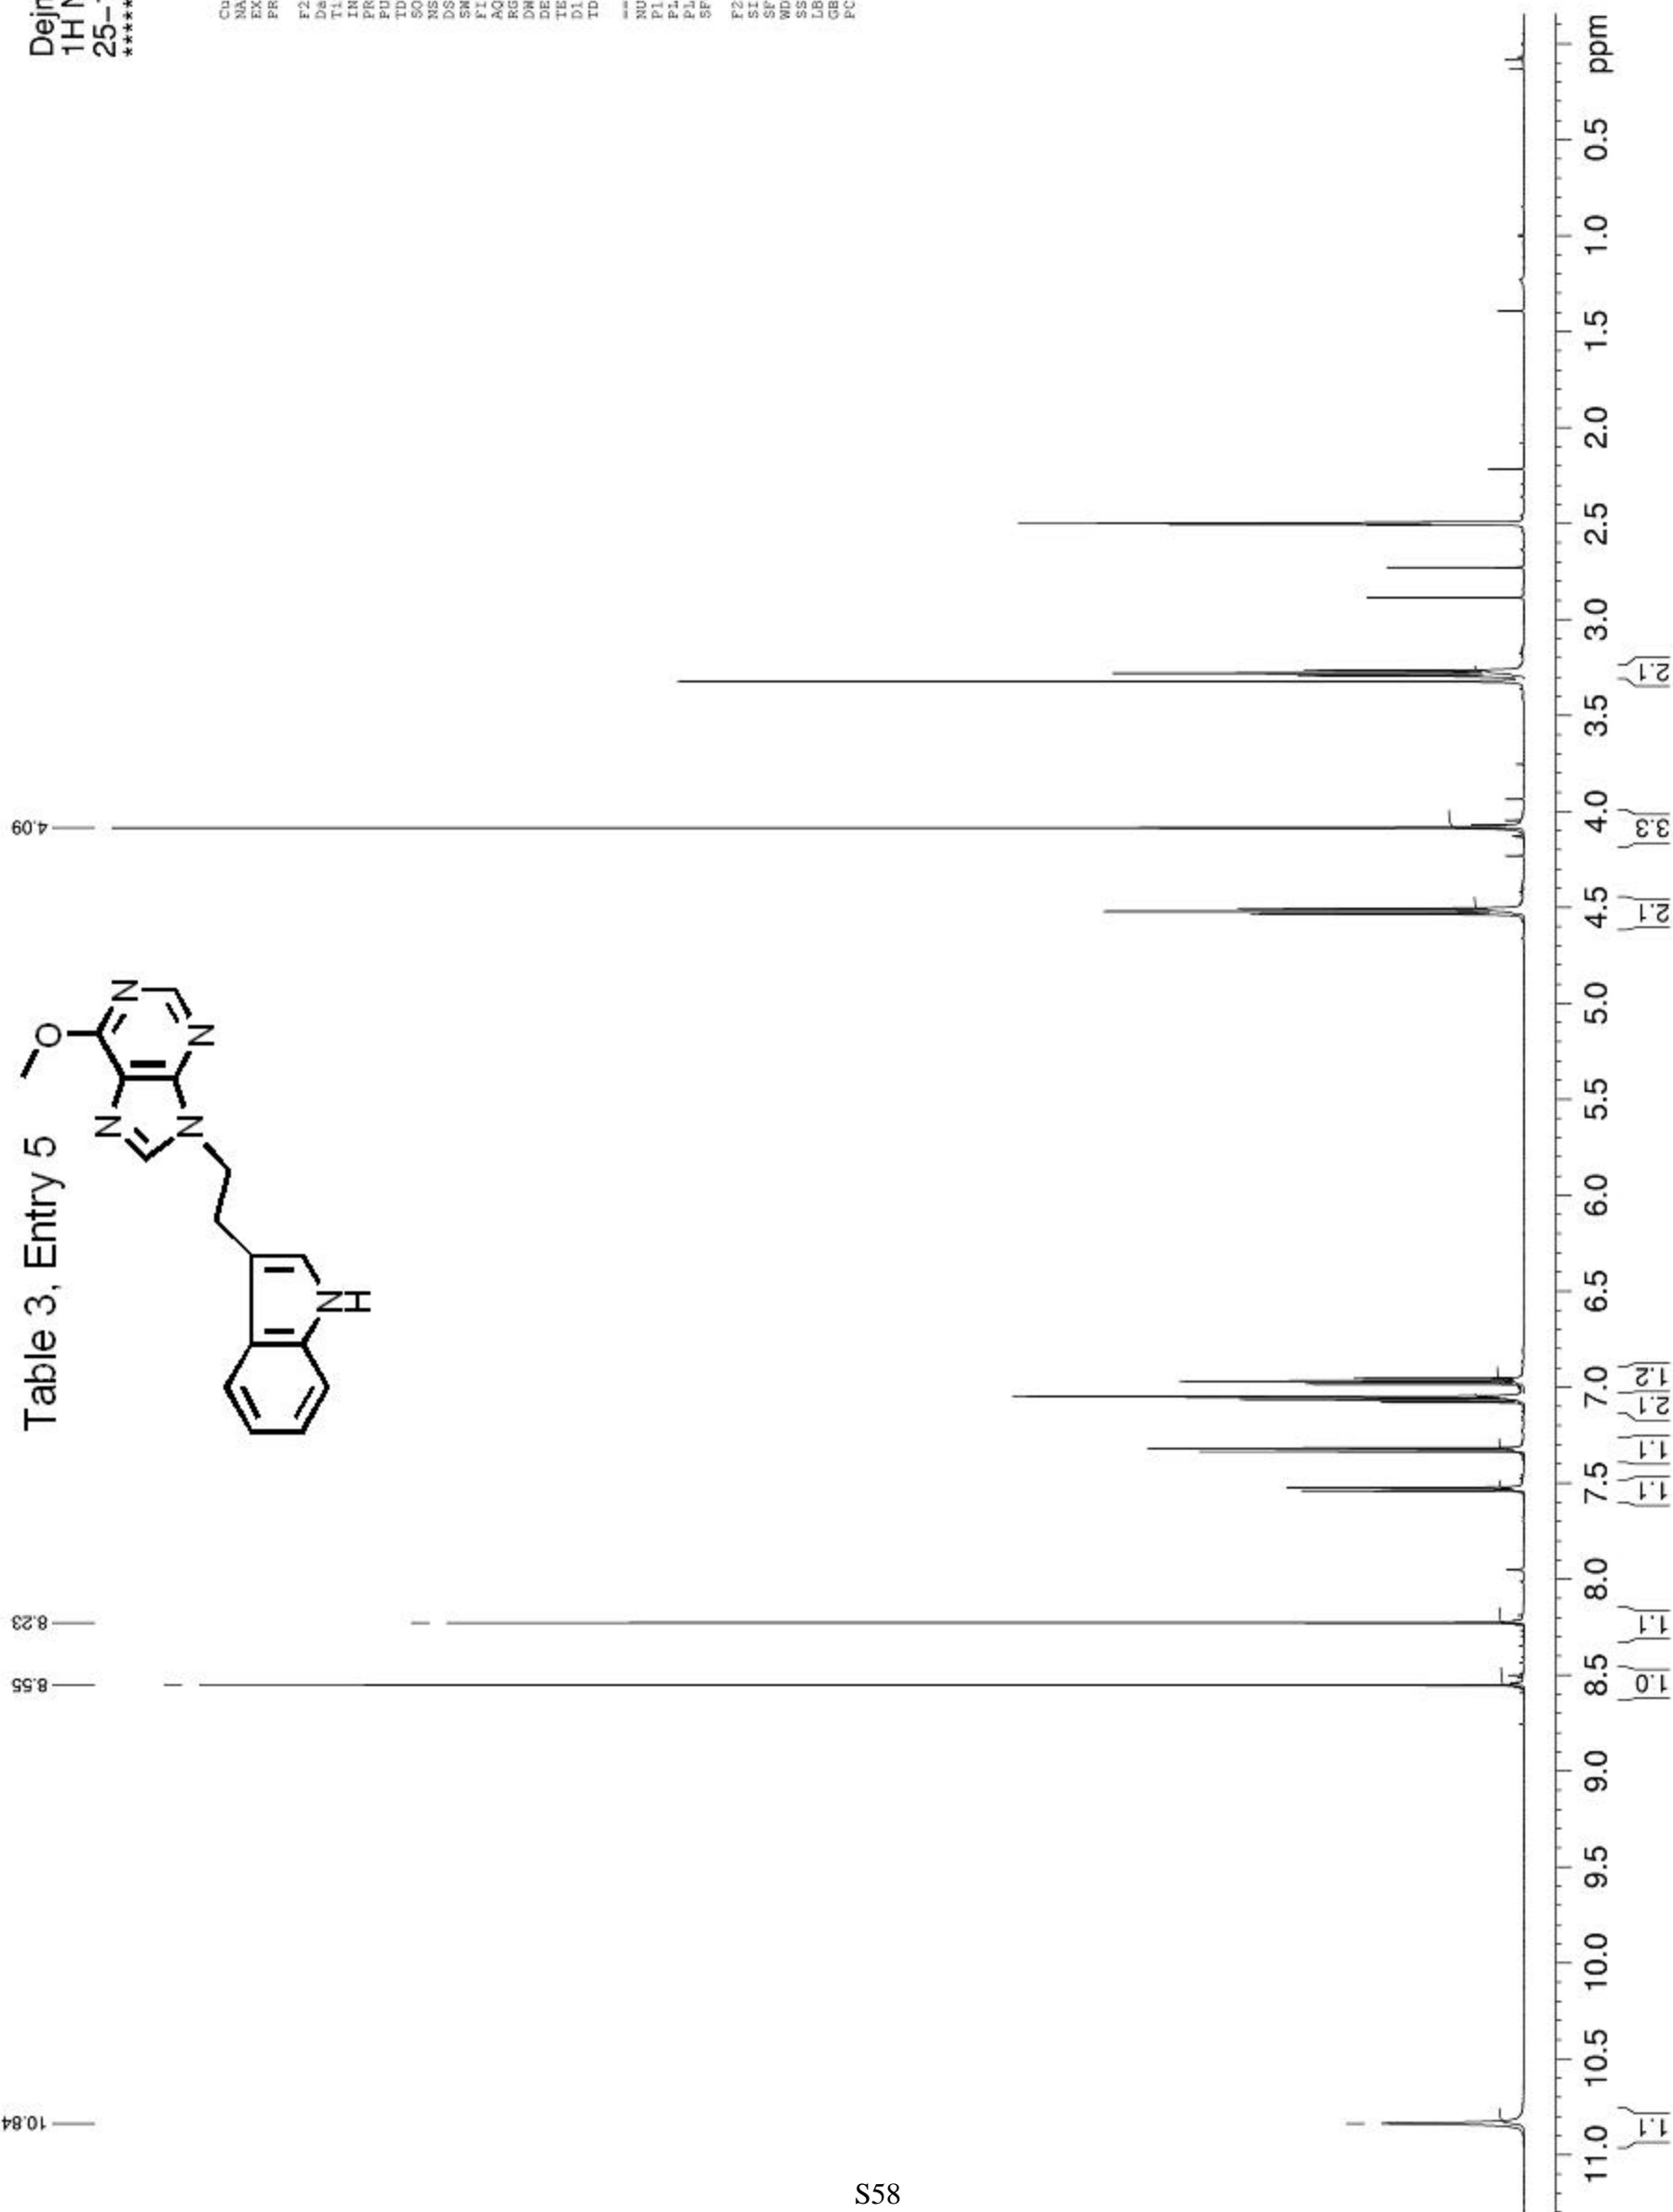

Dejmek\_MD394  
1H NMR in DMSO  
25-11-11 DR  
\*\*\*\*\*

Current Data Parameters  
NAME Dejmek\_MD394  
EXPNO 1  
PROCNO 1  
F2 - Acquisition Parameters  
Date\_ 20111125  
Time 9.24  
INSTRUM spect  
PROBHD 5 mm TXI 1H-13  
PULPROG zg30  
TD 60094  
SOLVENT DMSO  
NS 32  
DS 0  
SWH 7507.507 Hz  
FIDRES 0.124929 Hz  
AQ 4.0023770 sec  
RG 14.3  
DN 66.600 usec  
DE 6.00 usec  
TE 300.0 K  
D1 1.00000000 sec  
TD0 1  
CHANNEL f1  
NUC1 1H  
P1 8.00 usec  
PL 0.00 dB  
PL1 8.54041386 W  
SFO1 499.9534997 MHz  
F2 - Processing parameters  
SI 131072  
SF 499.9499980 MHz  
WDW nc  
SSB 0  
LB 0.00 Hz  
GB 0  
PC 1.00

Table 3, Entry 5

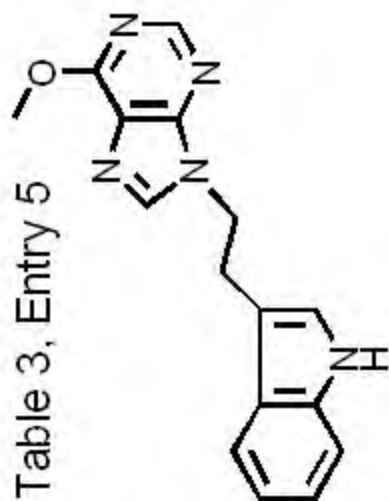

Dejmek\_MD394  
APT in DMSO  
25-11-11 DR  
\*\*\*\*\*

NAME Dejmek\_MD394  
EXPNO 2  
PROCNO 1  
Date\_ 20111125  
Time\_ 10.03  
INSTRUM spect  
PROBHD 5 mm TXI 1H-13  
PULPROG jmod  
TD 65536  
SOLVENT DMSO  
NS 737  
DS 4  
SWH 30030.029 Hz  
FIDRES 0.458222 Hz  
AQ 1.0912410 sec  
RG 29193  
DW 16.650 usec  
DE 6.50 usec  
TE 300.0 K  
CNST2 165.0000000  
CNST11 1.0000000  
D1 2.00000000 sec  
D20 0.00606061 sec  
TD0 1

==== CHANNEL f1 =====  
NUC1 13C  
P1 14.75 usec  
P2 29.50 usec  
PL1 0.00 dB  
PL1W 67.82093048 W  
SFO1 125.7263554 MHz

==== CHANNEL f2 =====  
CPDPRG2 waltz16  
NUC2 1H  
PCPD2 60.00 usec  
PL2 0.00 dB  
PL12 17.50 dB  
PL2W 8.54041386 W  
PL12W 0.15187243 W  
SFO2 499.9519998 MHz  
SI 131072  
SF 125.7125648 MHz  
WDW EM  
SSB 0  
LB 1.00 Hz  
GB 0  
PC 1.00

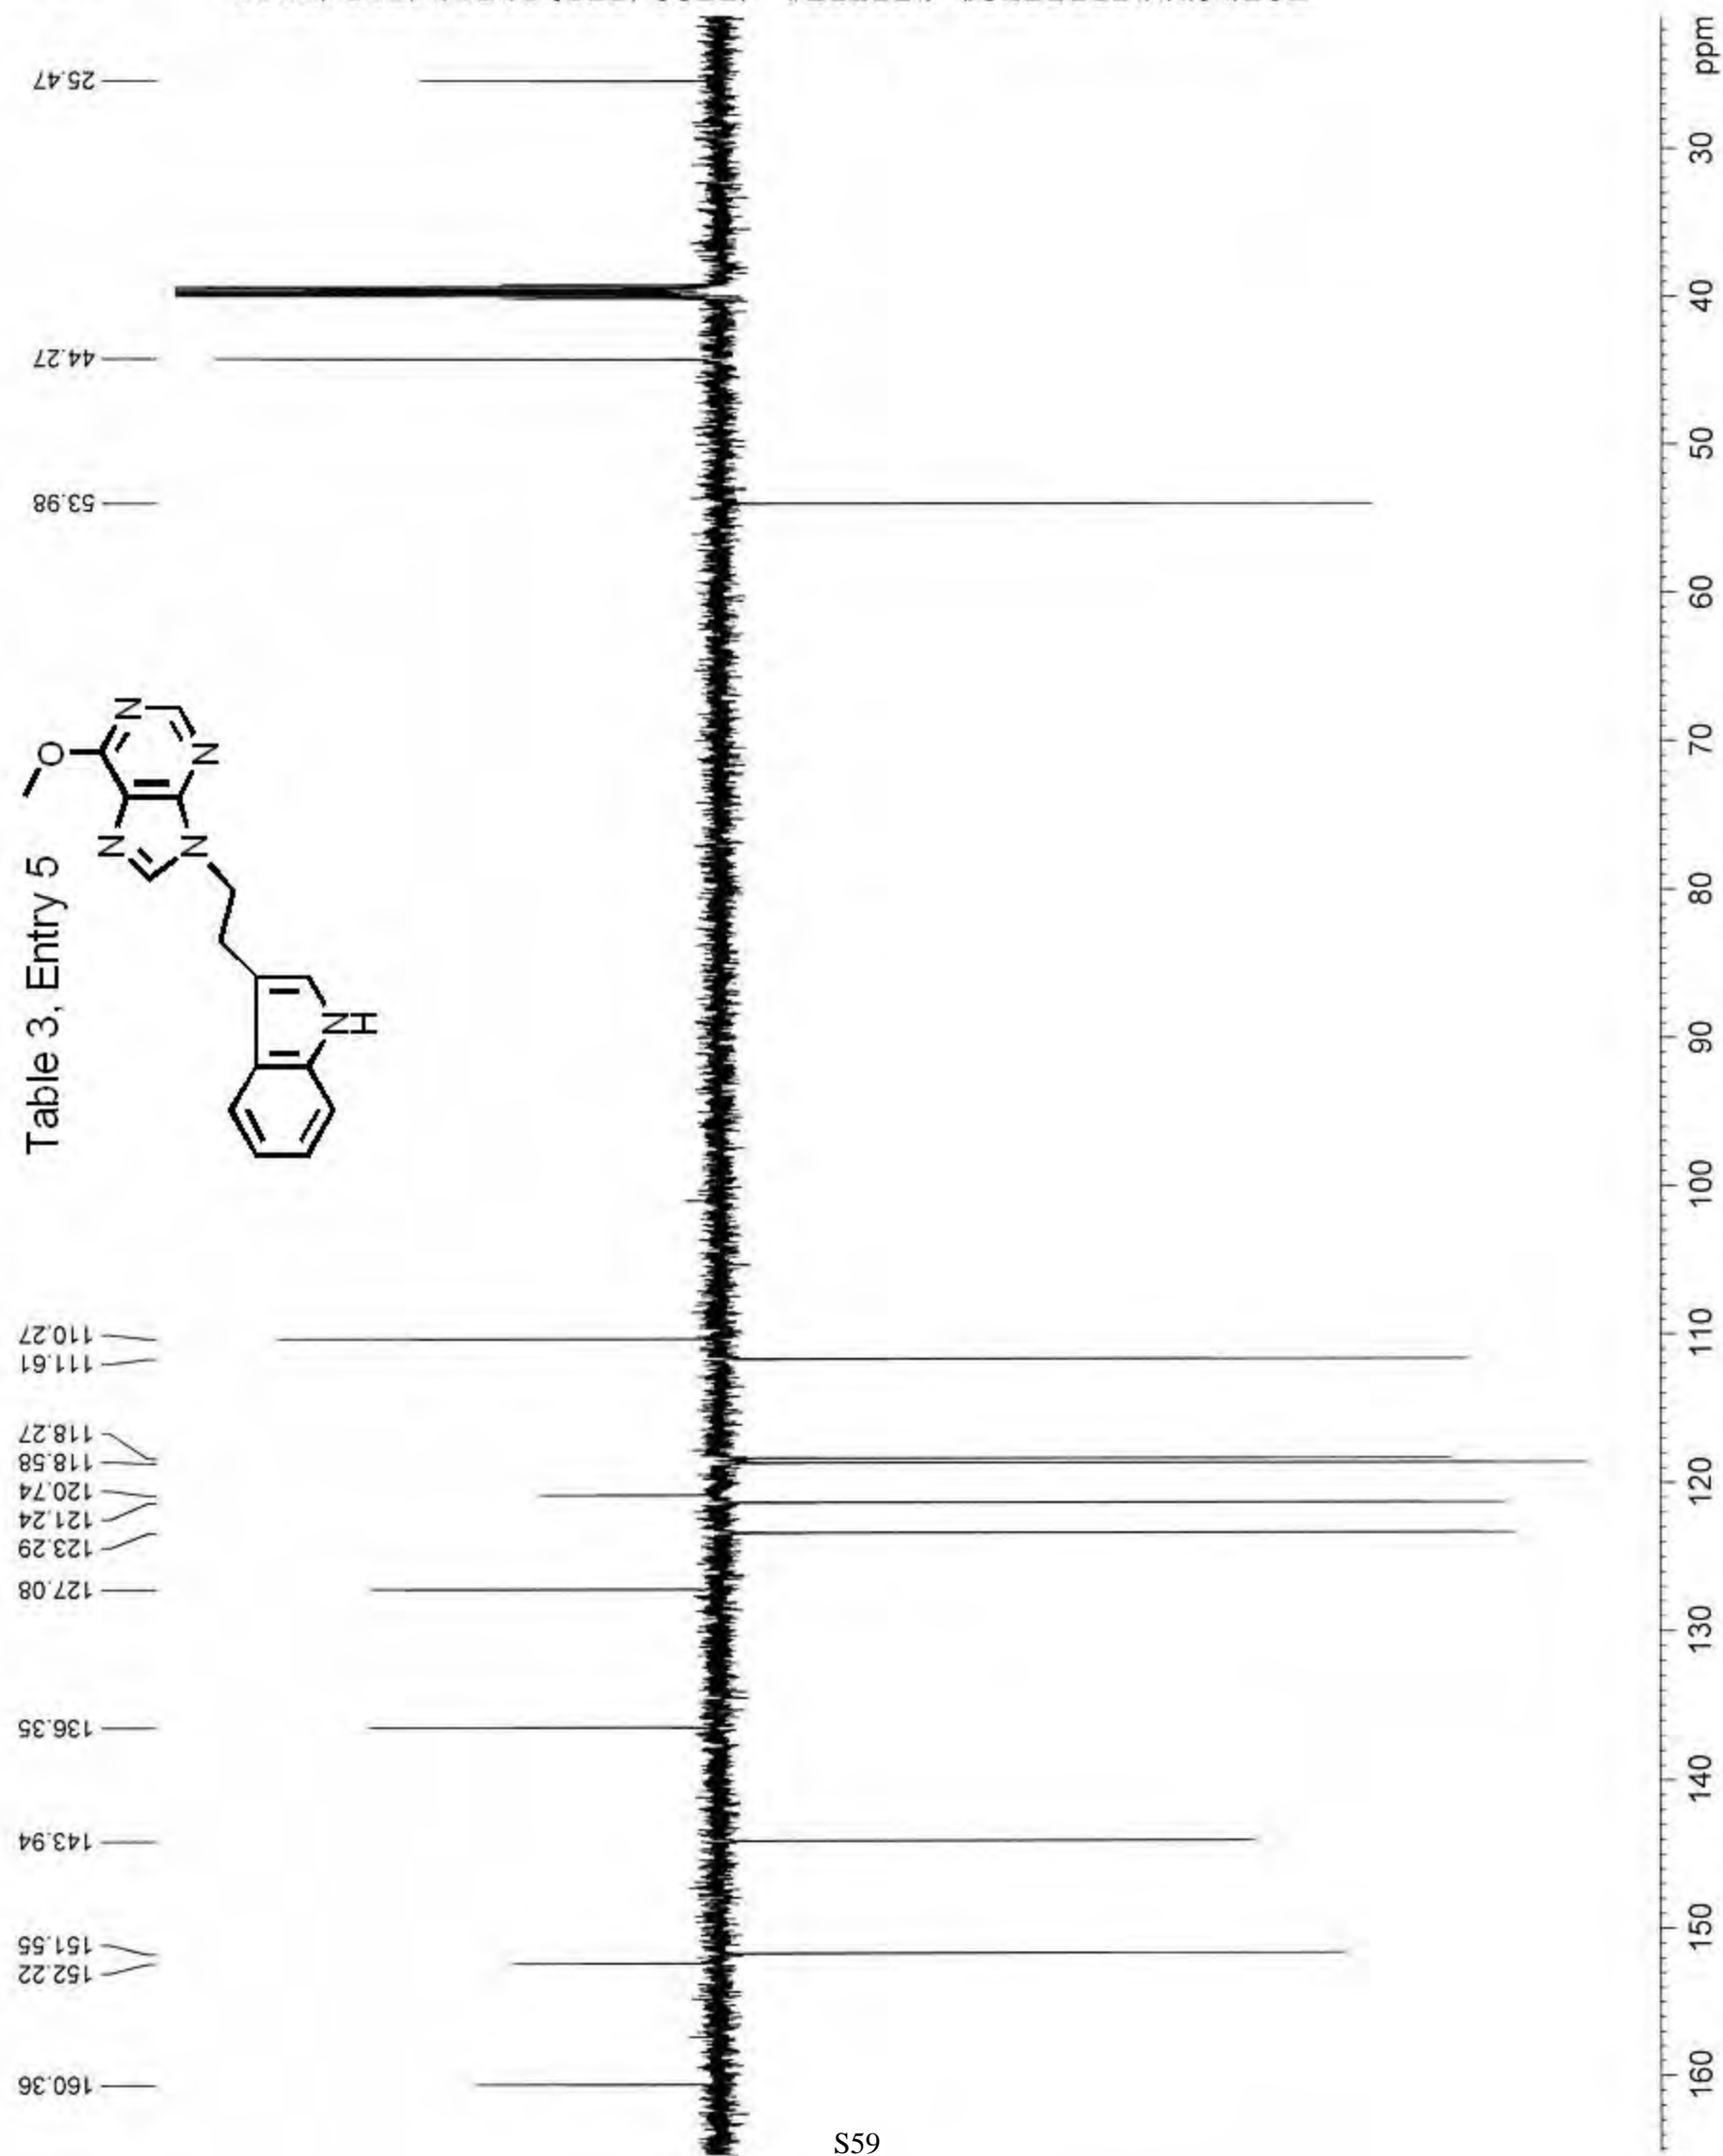

Table 3, Entry 6

Dejmek\_MD350  
1H NMR in DMSO  
6-10-11 DR  
\*\*\*\*\*

Current Data Parameters  
NAME Dejmek\_MD350  
EXPNO 1  
PROCNO 1  
F2 - Acquisition Parameters  
Date\_ 20111006  
Time 9.43  
INSTRUM spect  
PROBHD 5 mm TXI 1H-13  
PULPROG zg30  
TD 60094  
SOLVENT DMSO  
NS 32  
DS 0  
SWH 7507.507 Hz  
FIDRES 0.124929 Hz  
AQ 4.0023770 sec  
RG 14.3  
DN 66.600 usec  
DE 6.00 usec  
TE 300.0 K  
D1 1.00000000 sec  
TD0 1  
CHANNEL f1  
NUC1 1H  
P1 9.00 usec  
PL 3.00 dB  
PL1W 4.28034639 W  
SFO1 499.9534997 MHz  
F2 - Processing parameters  
SI 131072  
SF 499.9500006 MHz  
WDW nc  
SSB 0  
LB 0.00 Hz  
GB 0  
PC 1.00

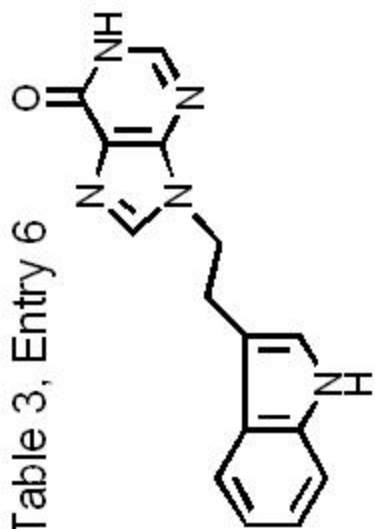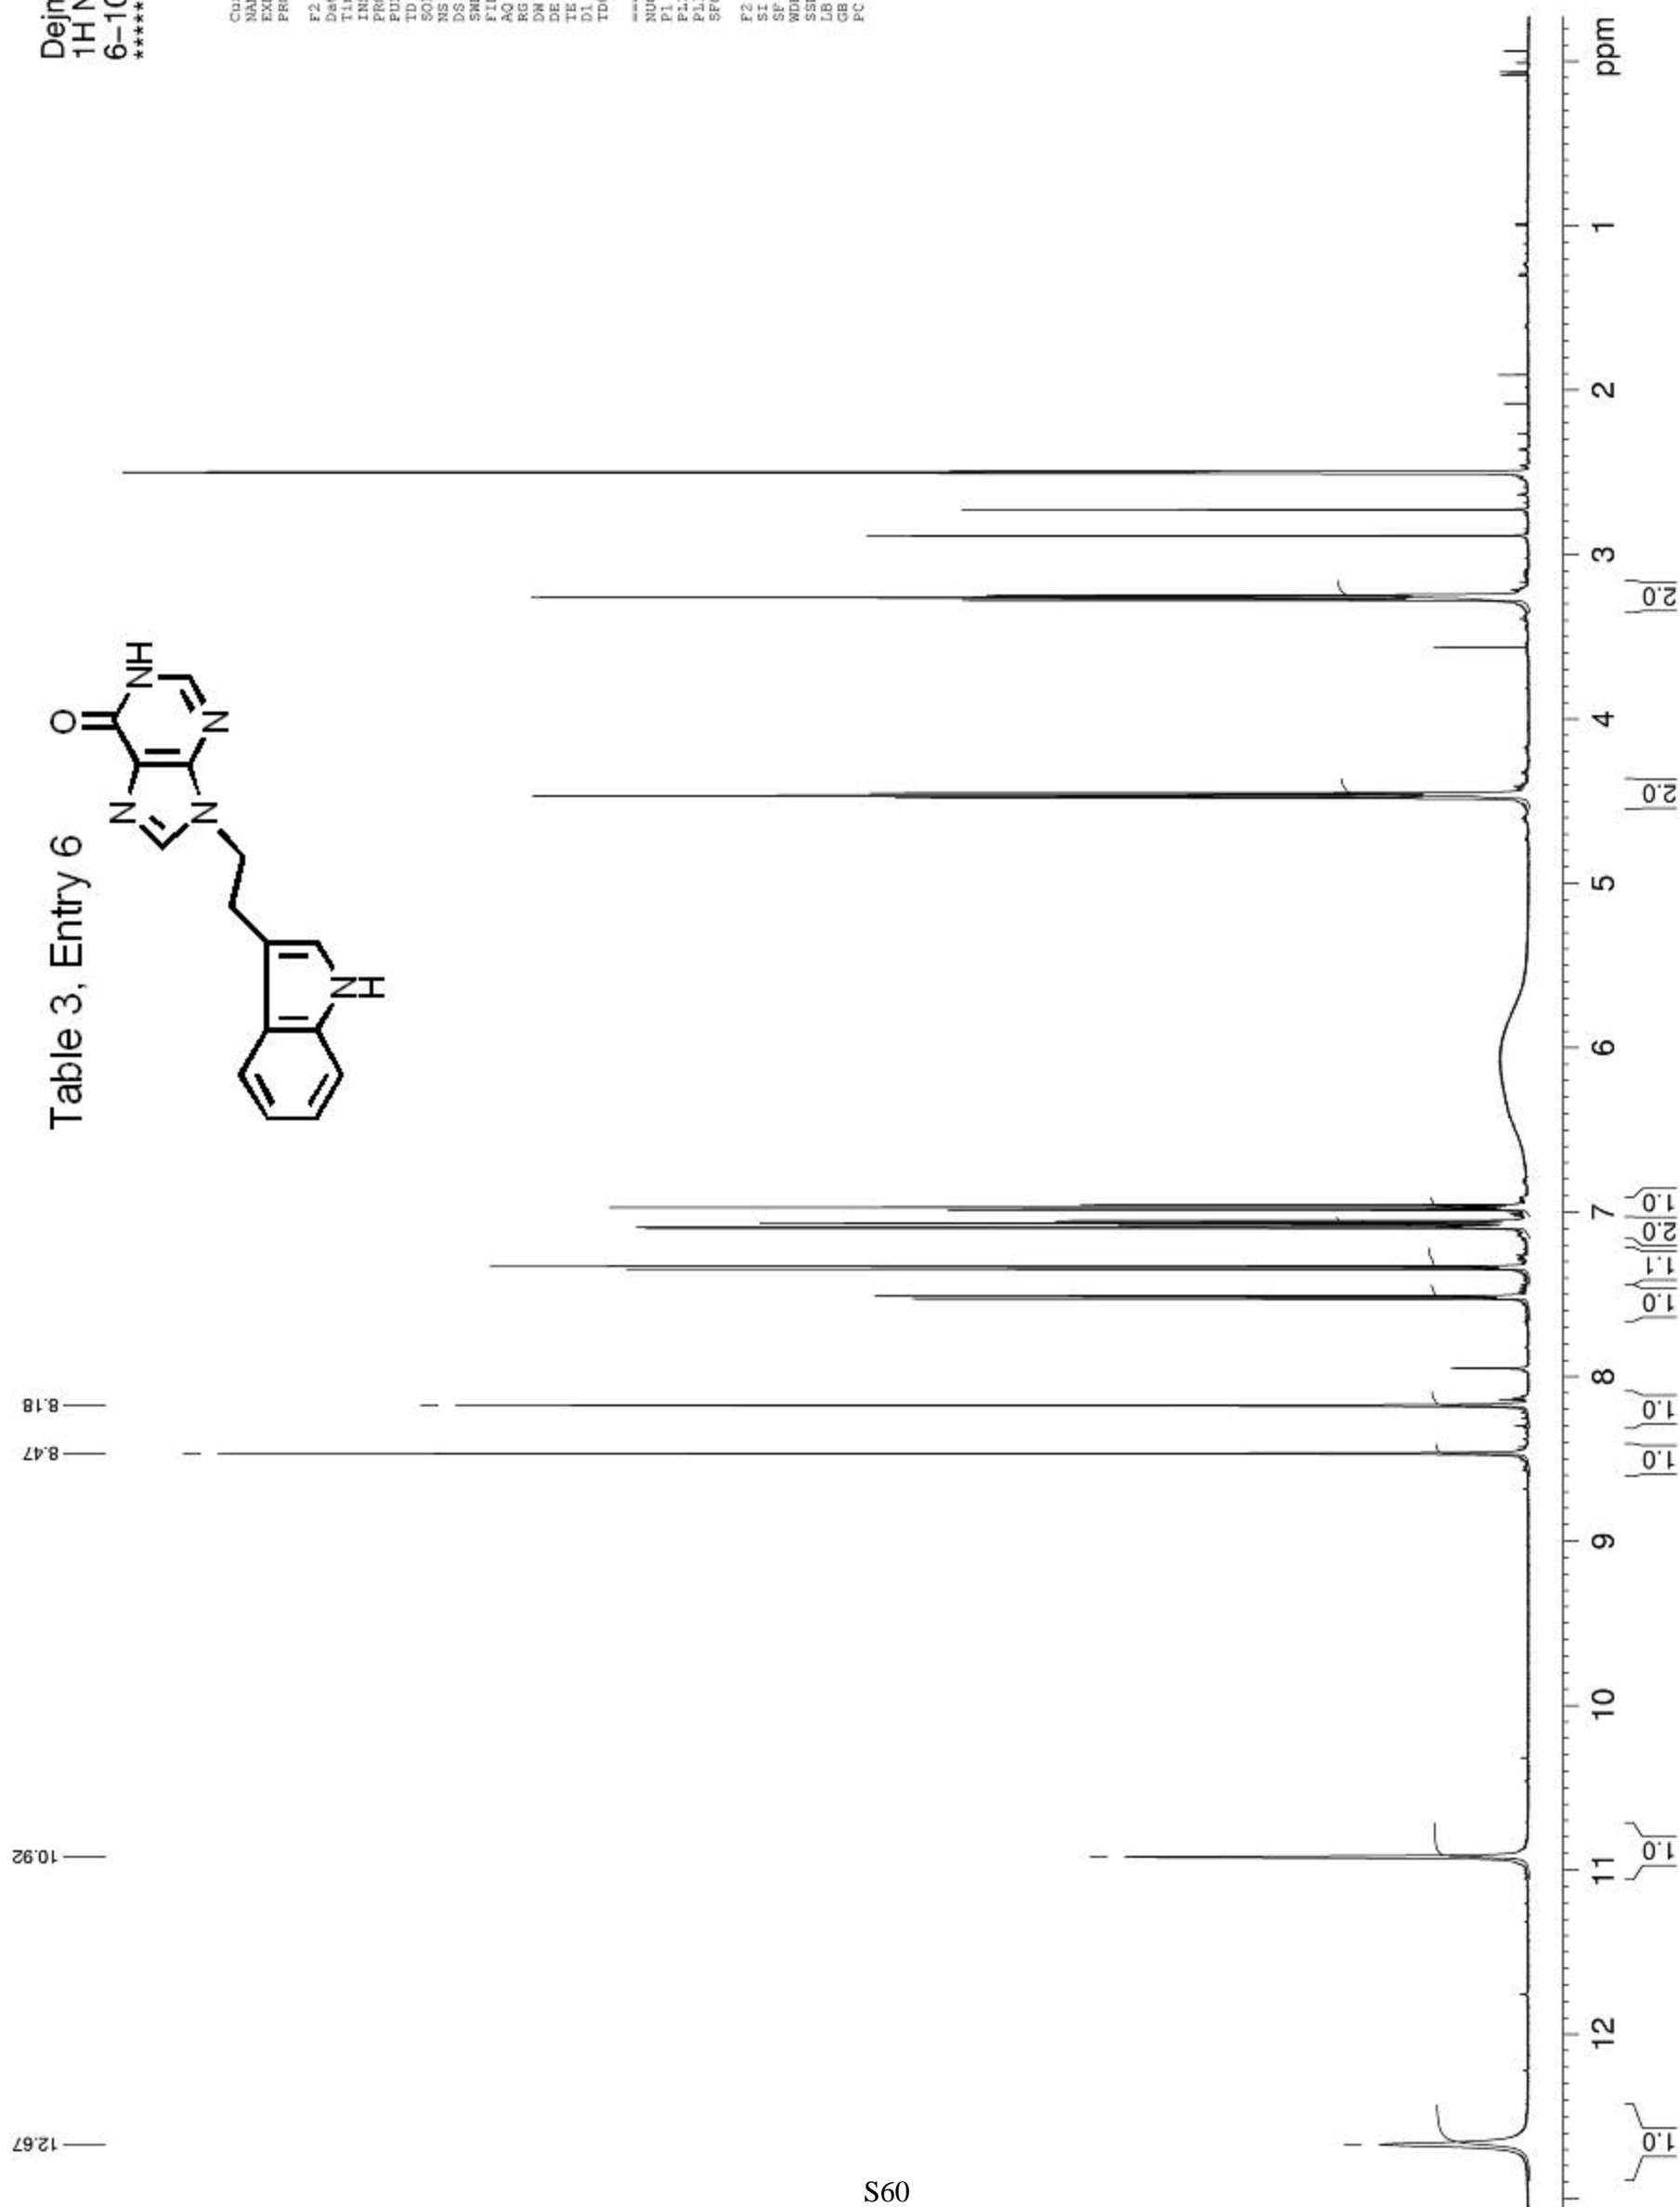

Table 3, Entry 6

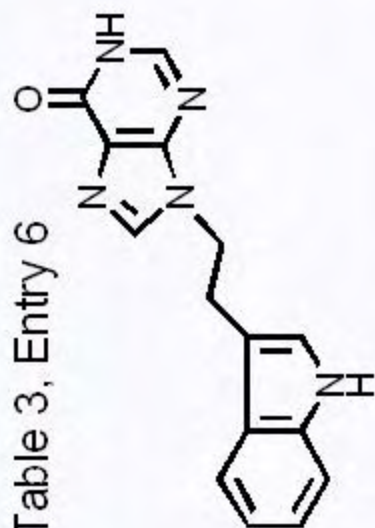

Dejmek\_MD350  
APT in DMSO  
6-10-11 DR  
\*\*\*\*\*

NAME Dejmek\_MD350  
EXPNO 2  
PROCNO 1  
Date\_ 20111006  
Time\_ 9.47  
INSTRUM spect  
PROBHD 5 mm TXI 1H-13  
PULPROG jmod  
TD 65536  
SOLVENT DMSO  
NS 922  
DS 4  
SWH 30030.029 Hz  
FIDRES 0.458222 Hz  
AQ 1.0912410 sec  
RG 29193  
DW 16.650 usec  
DE 6.50 usec  
TE 300.0 K  
CNST2 165.0000000  
CNST11 1.0000000  
D1 2.00000000 sec  
D20 0.00606061 sec  
TD0 1

==== CHANNEL f1 =====  
NUC1 13C  
P1 14.50 usec  
P2 29.00 usec  
PL1 0.00 dB  
PL1W 67.82093048 W  
SFO1 125.7263554 MHz

==== CHANNEL f2 =====  
CPDPRG2 waltz16  
NUC2 1H  
PCPD2 60.00 usec  
PL2 3.00 dB  
PL12 19.48 dB  
PL2W 4.26034639 W  
PL12W 0.09626734 W  
SFO2 499.9519998 MHz  
SI 131072  
SF 125.7125644 MHz  
WDW EM  
SSB 0  
LB 1.00 Hz  
GB 0  
PC 1.00

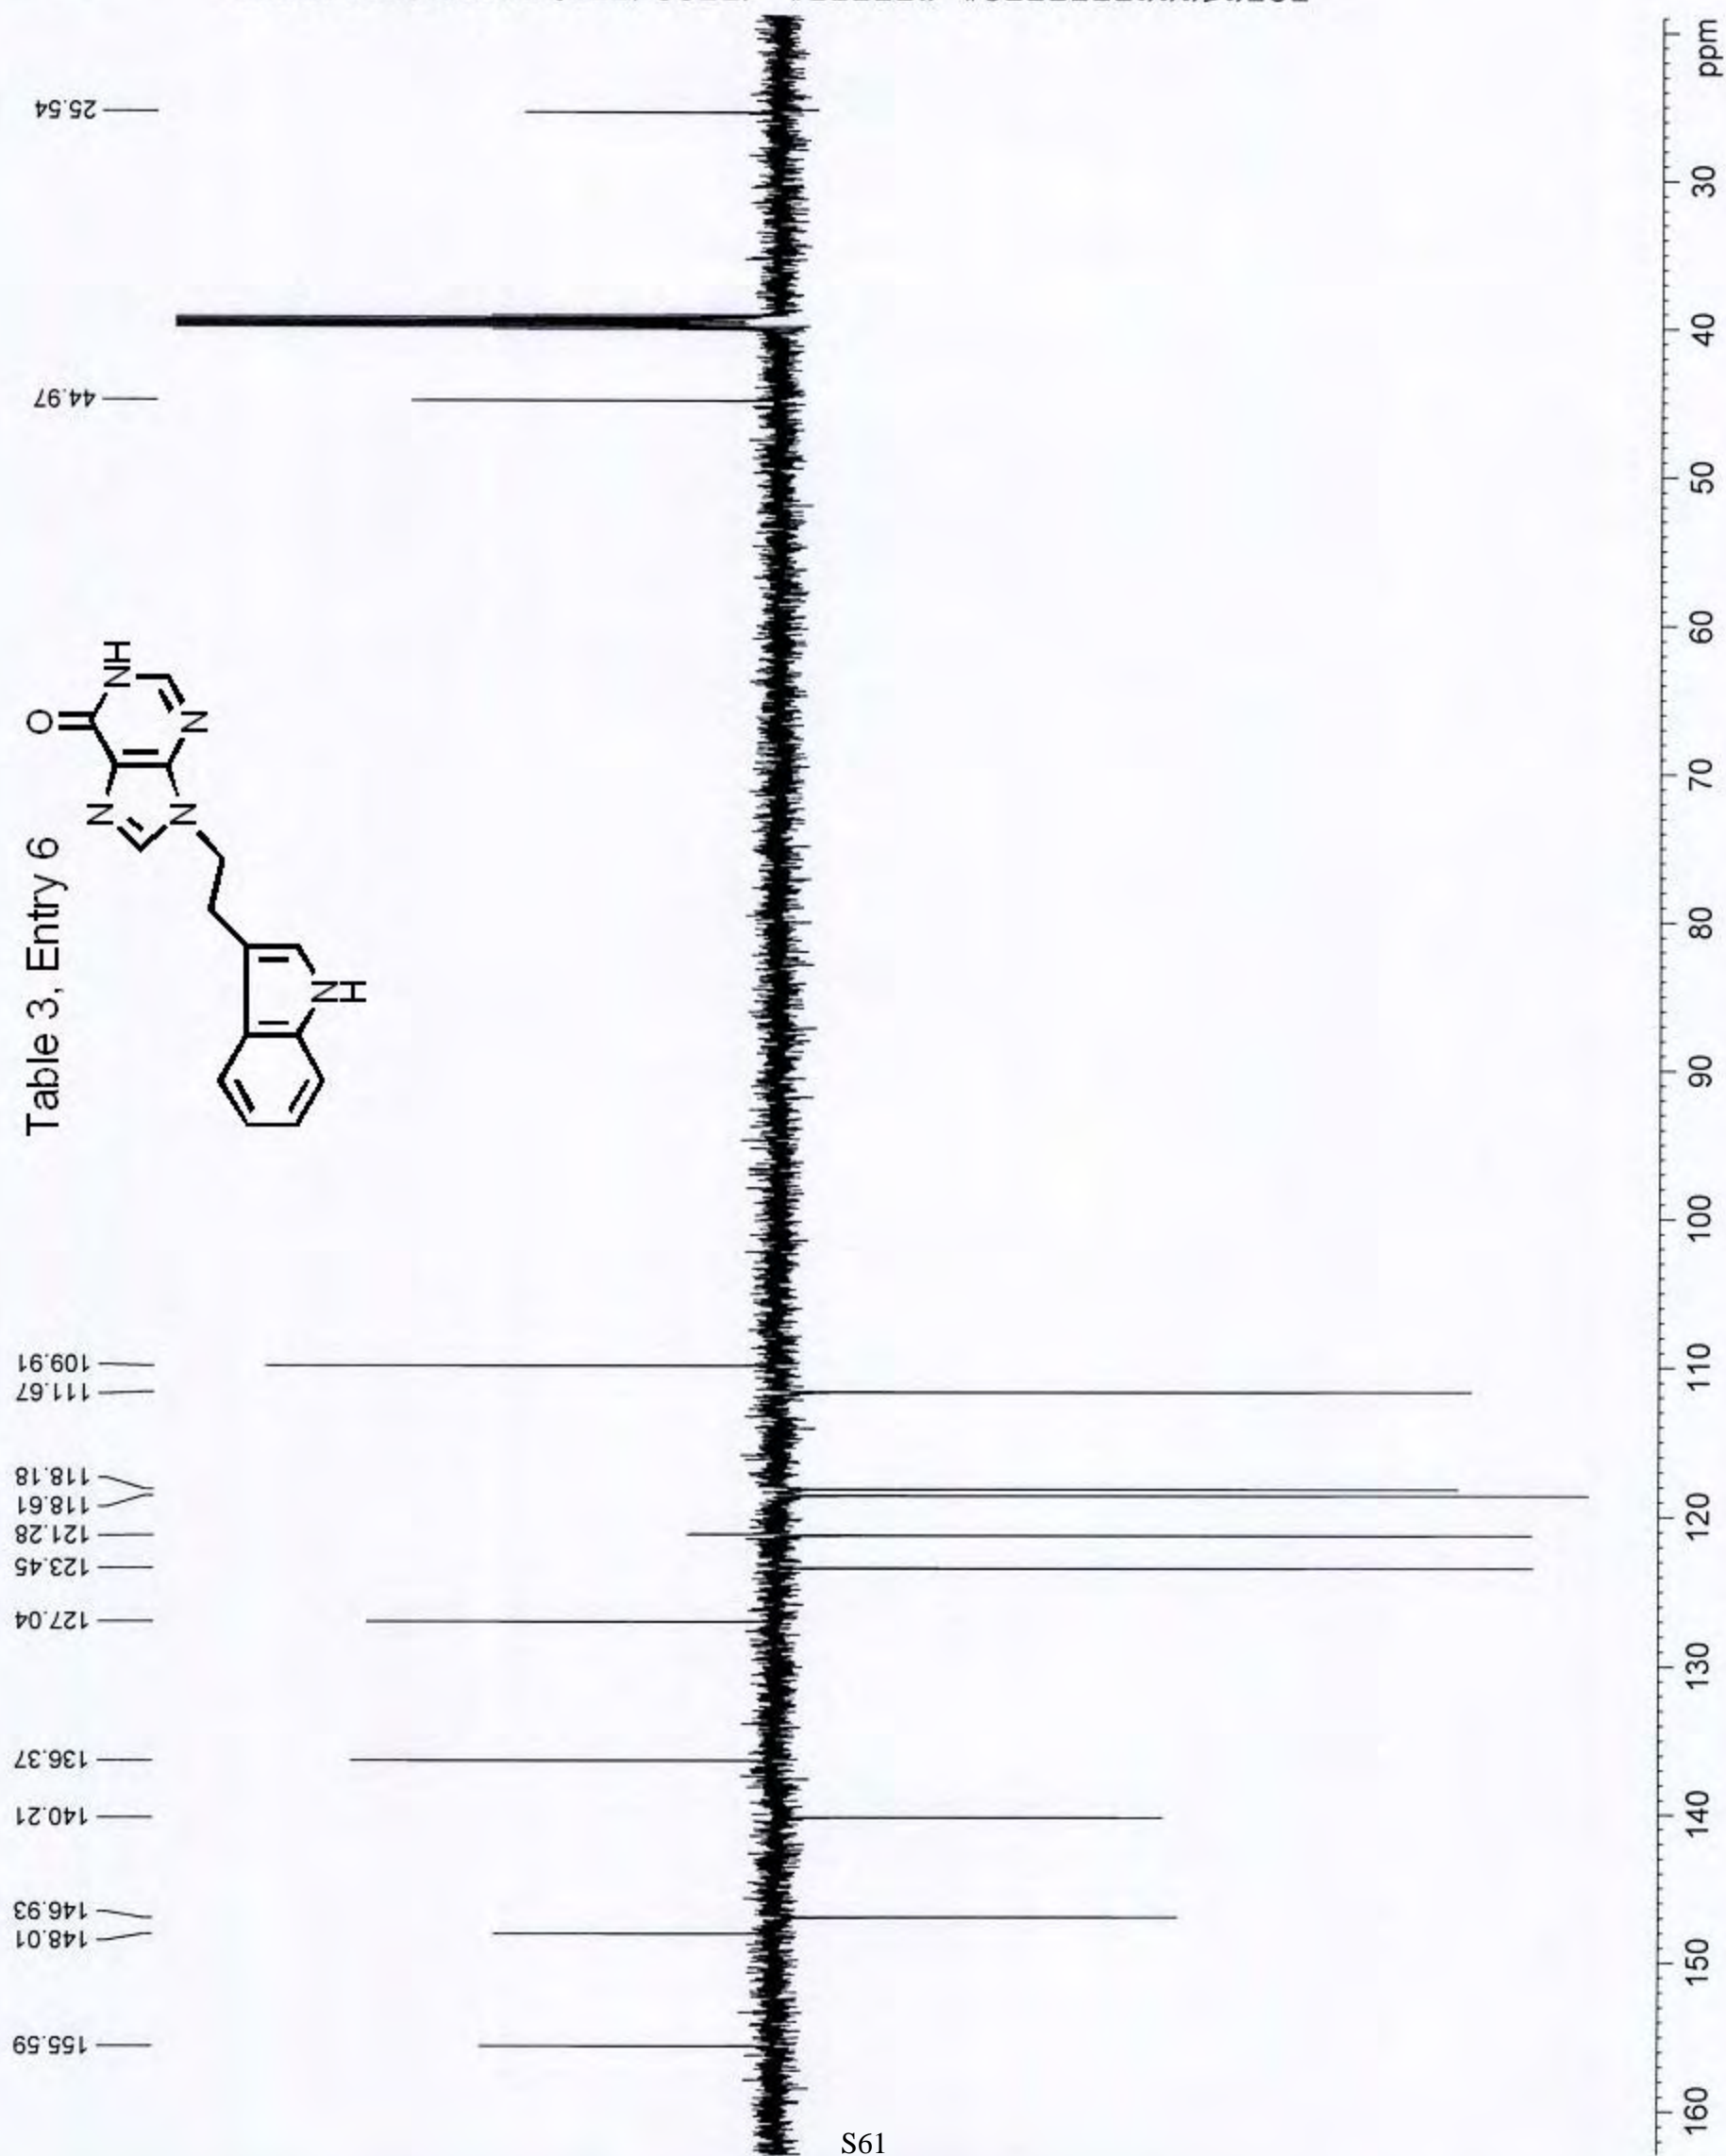

Table 3, Entry 7

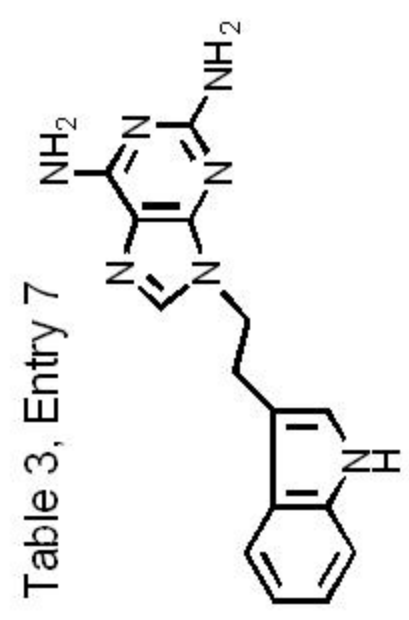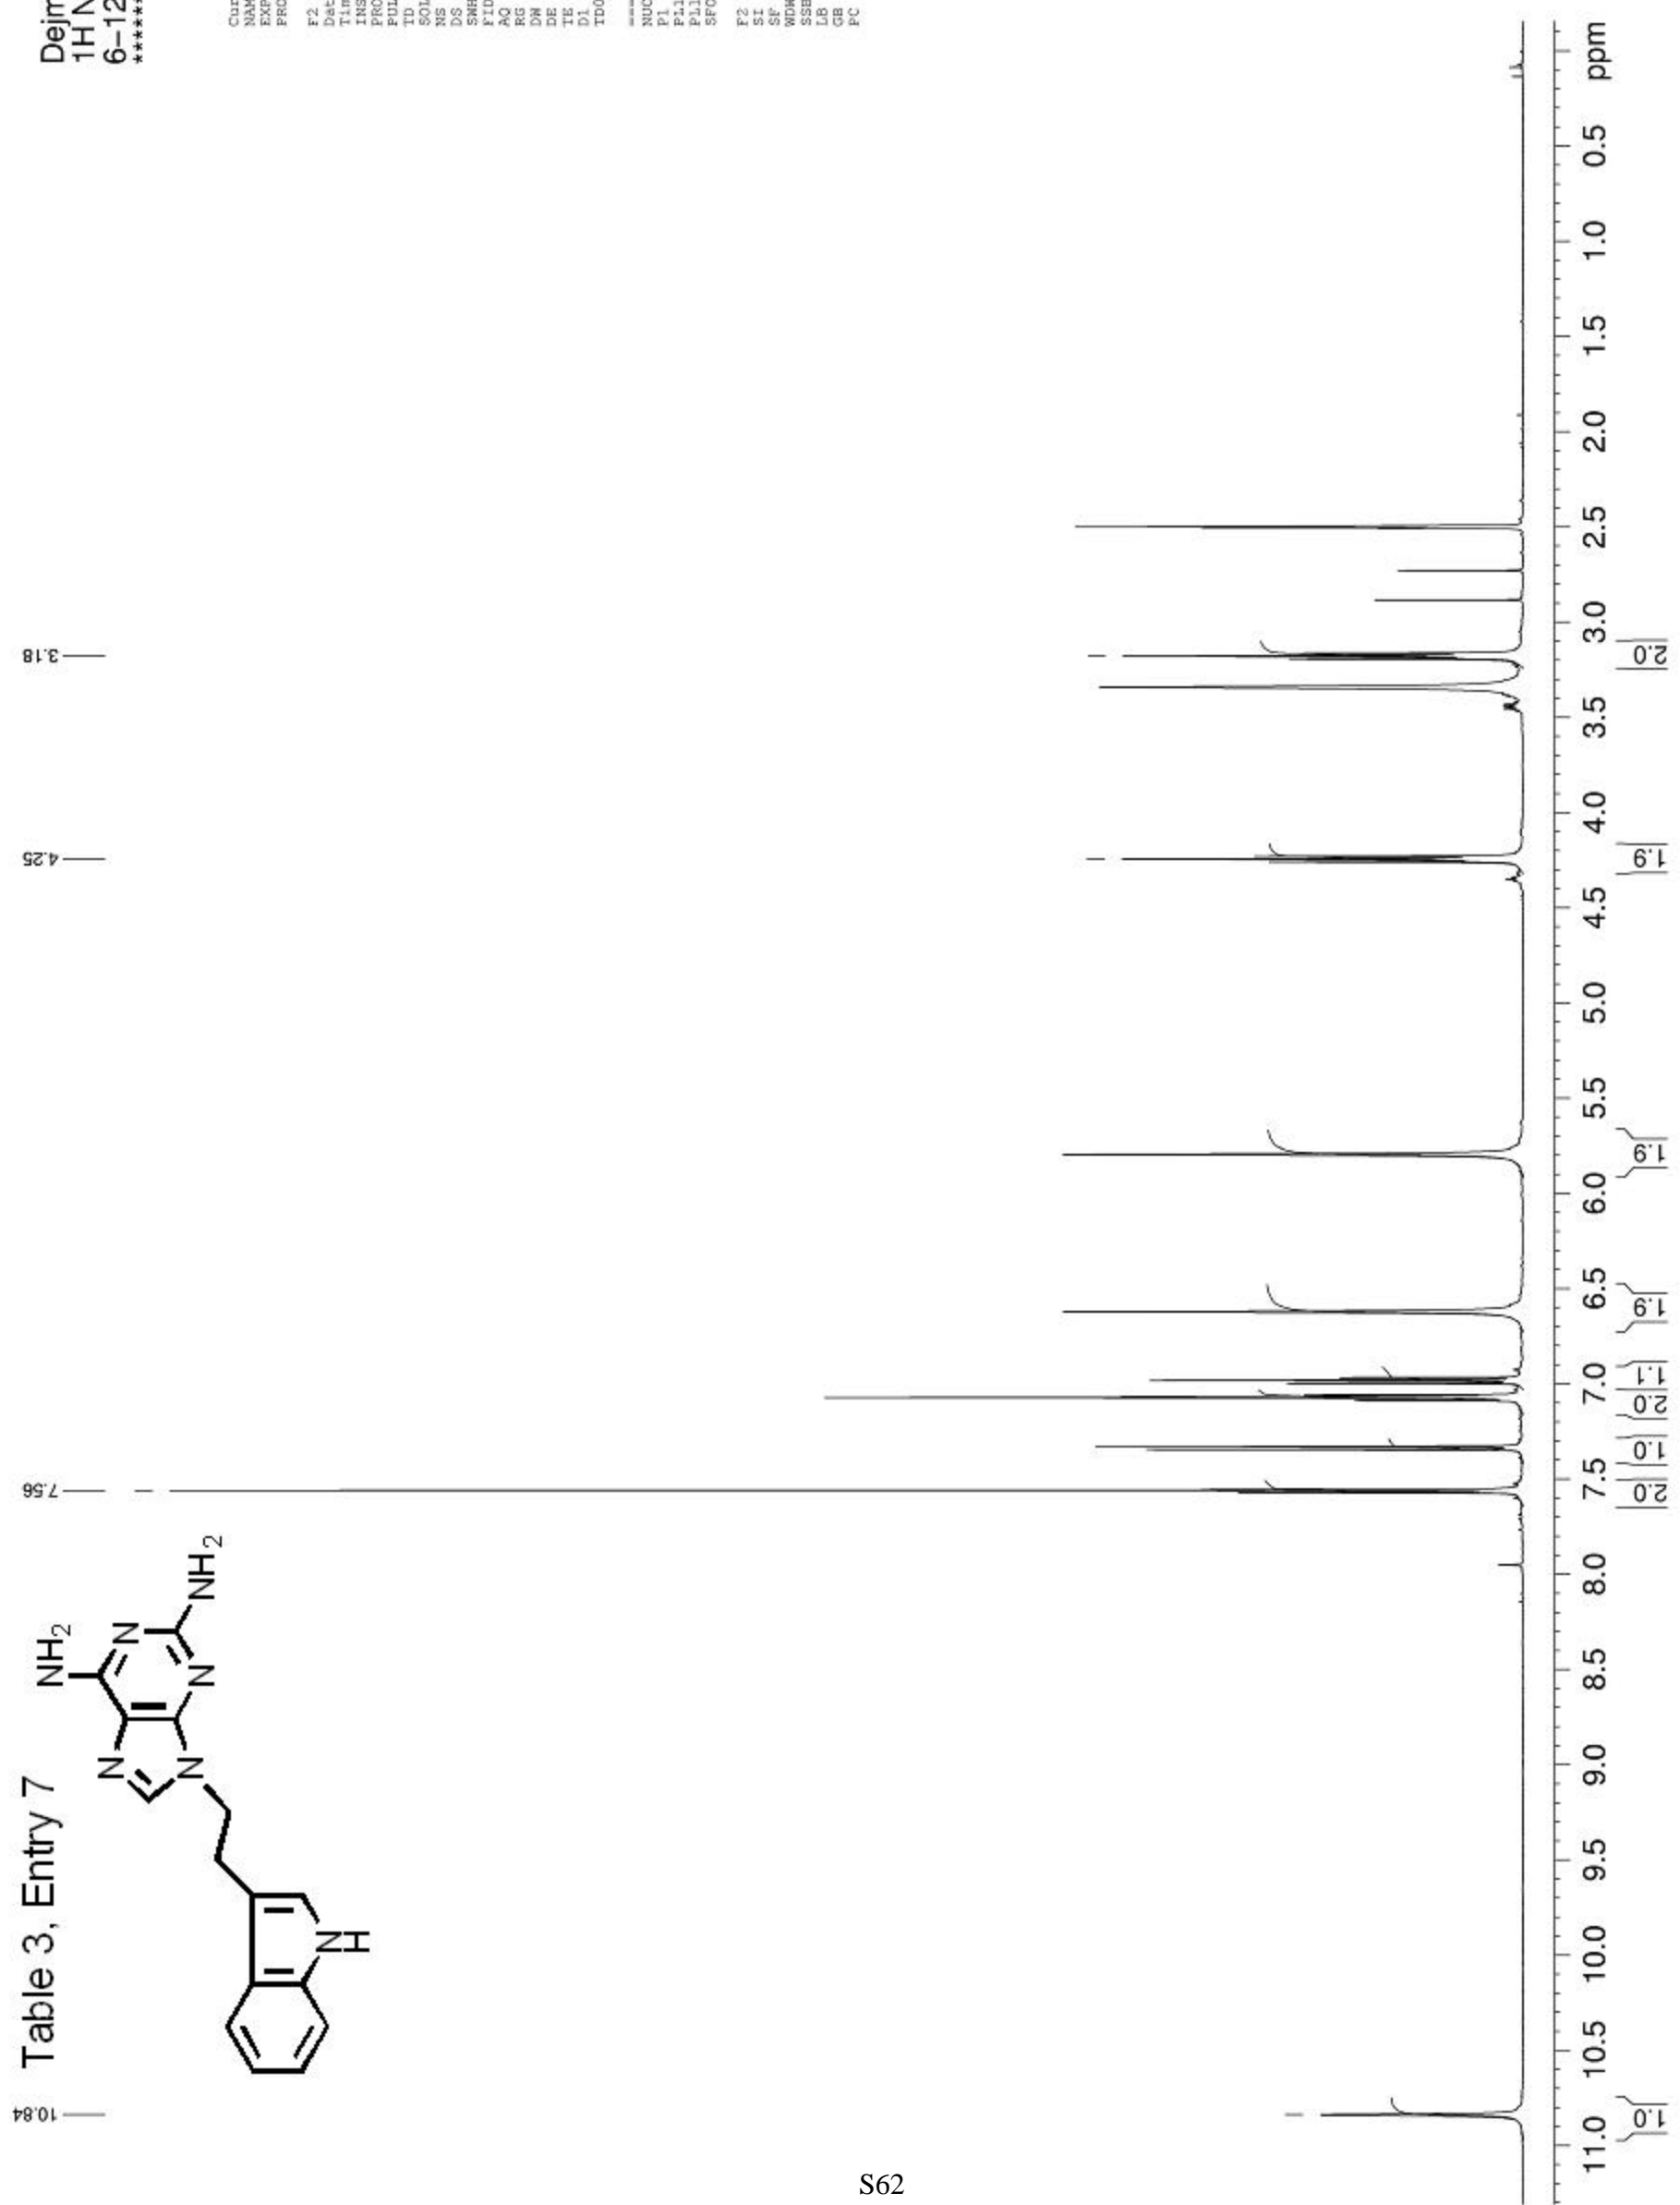

Dejmek\_MD390  
1H NMR in DMSO  
6-12-11 DR  
\*\*\*\*\*

Current Data Parameters  
NAME Dejmek\_MD390  
EXPNO 1  
PROCNO 1  
F2 - Acquisition Parameters  
Date\_ 20111206  
Time 13.30  
INSTRUM spect  
PROBHD 5 mm TXI 1H-13  
PULPROG zg30  
TD 65536  
SOLVENT DMSO  
NS 32  
DS 0  
SWH 7507.507 Hz  
FIDRES 0.124929 Hz  
AQ 4.0023770 sec  
RG 14.3  
DN 66.600 usec  
DE 6.00 usec  
TE 300.0 K  
D1 1.00000000 sec  
TD0 1  
CHANNEL f1  
NUC1 1H  
P1 8.00 usec  
PL1 0.00 dB  
PL1W 8.54041386 W  
SFO1 499.9534997 MHz  
F2 - Processing parameters  
SI 131072  
SF 499.9499977 MHz  
WDW nc  
SSB 0  
LB 0.00 Hz  
GB 0  
PC 1.00

Table 3, Entry 7

Dejmek\_MD390  
APT in DMSO  
6-12-11 DR  
\*\*\*\*\*

NAME Dejmek\_MD390  
EXPNO 2  
PROCNO 1  
Date\_ 20111206  
Time\_ 13.49  
INSTRUM spect  
PROBHD 5 mm TXI 1H-13  
PULPROG jmod  
TD 65536  
SOLVENT DMSO  
NS 355  
DS 4  
SWH 30030.029 Hz  
FIDRES 0.458222 Hz  
AQ 1.0912410 sec  
RG 29193  
DW 16.650 usec  
DE 6.50 usec  
TE 300.0 K  
CNST2 165.0000000  
CNST11 1.0000000  
D1 2.00000000 sec  
D20 0.00606061 sec  
TD0 1

==== CHANNEL f1 =====  
NUC1 13C  
P1 14.75 usec  
P2 29.50 usec  
PL1 0.00 dB  
PL1W 67.82093048 W  
SFO1 125.7263554 MHz

==== CHANNEL f2 =====  
CPDPRG2 waltz16  
NUC2 1H  
PCPD2 60.00 usec  
PL2 0.00 dB  
PL12 17.50 dB  
PL2W 8.54041386 W  
PL12W 0.15187243 W  
SFO2 499.9519998 MHz  
SI 131072  
SF 125.7125634 MHz  
WDW EM  
SSB 0  
LB 1.00 Hz  
GB 0  
PC 1.00

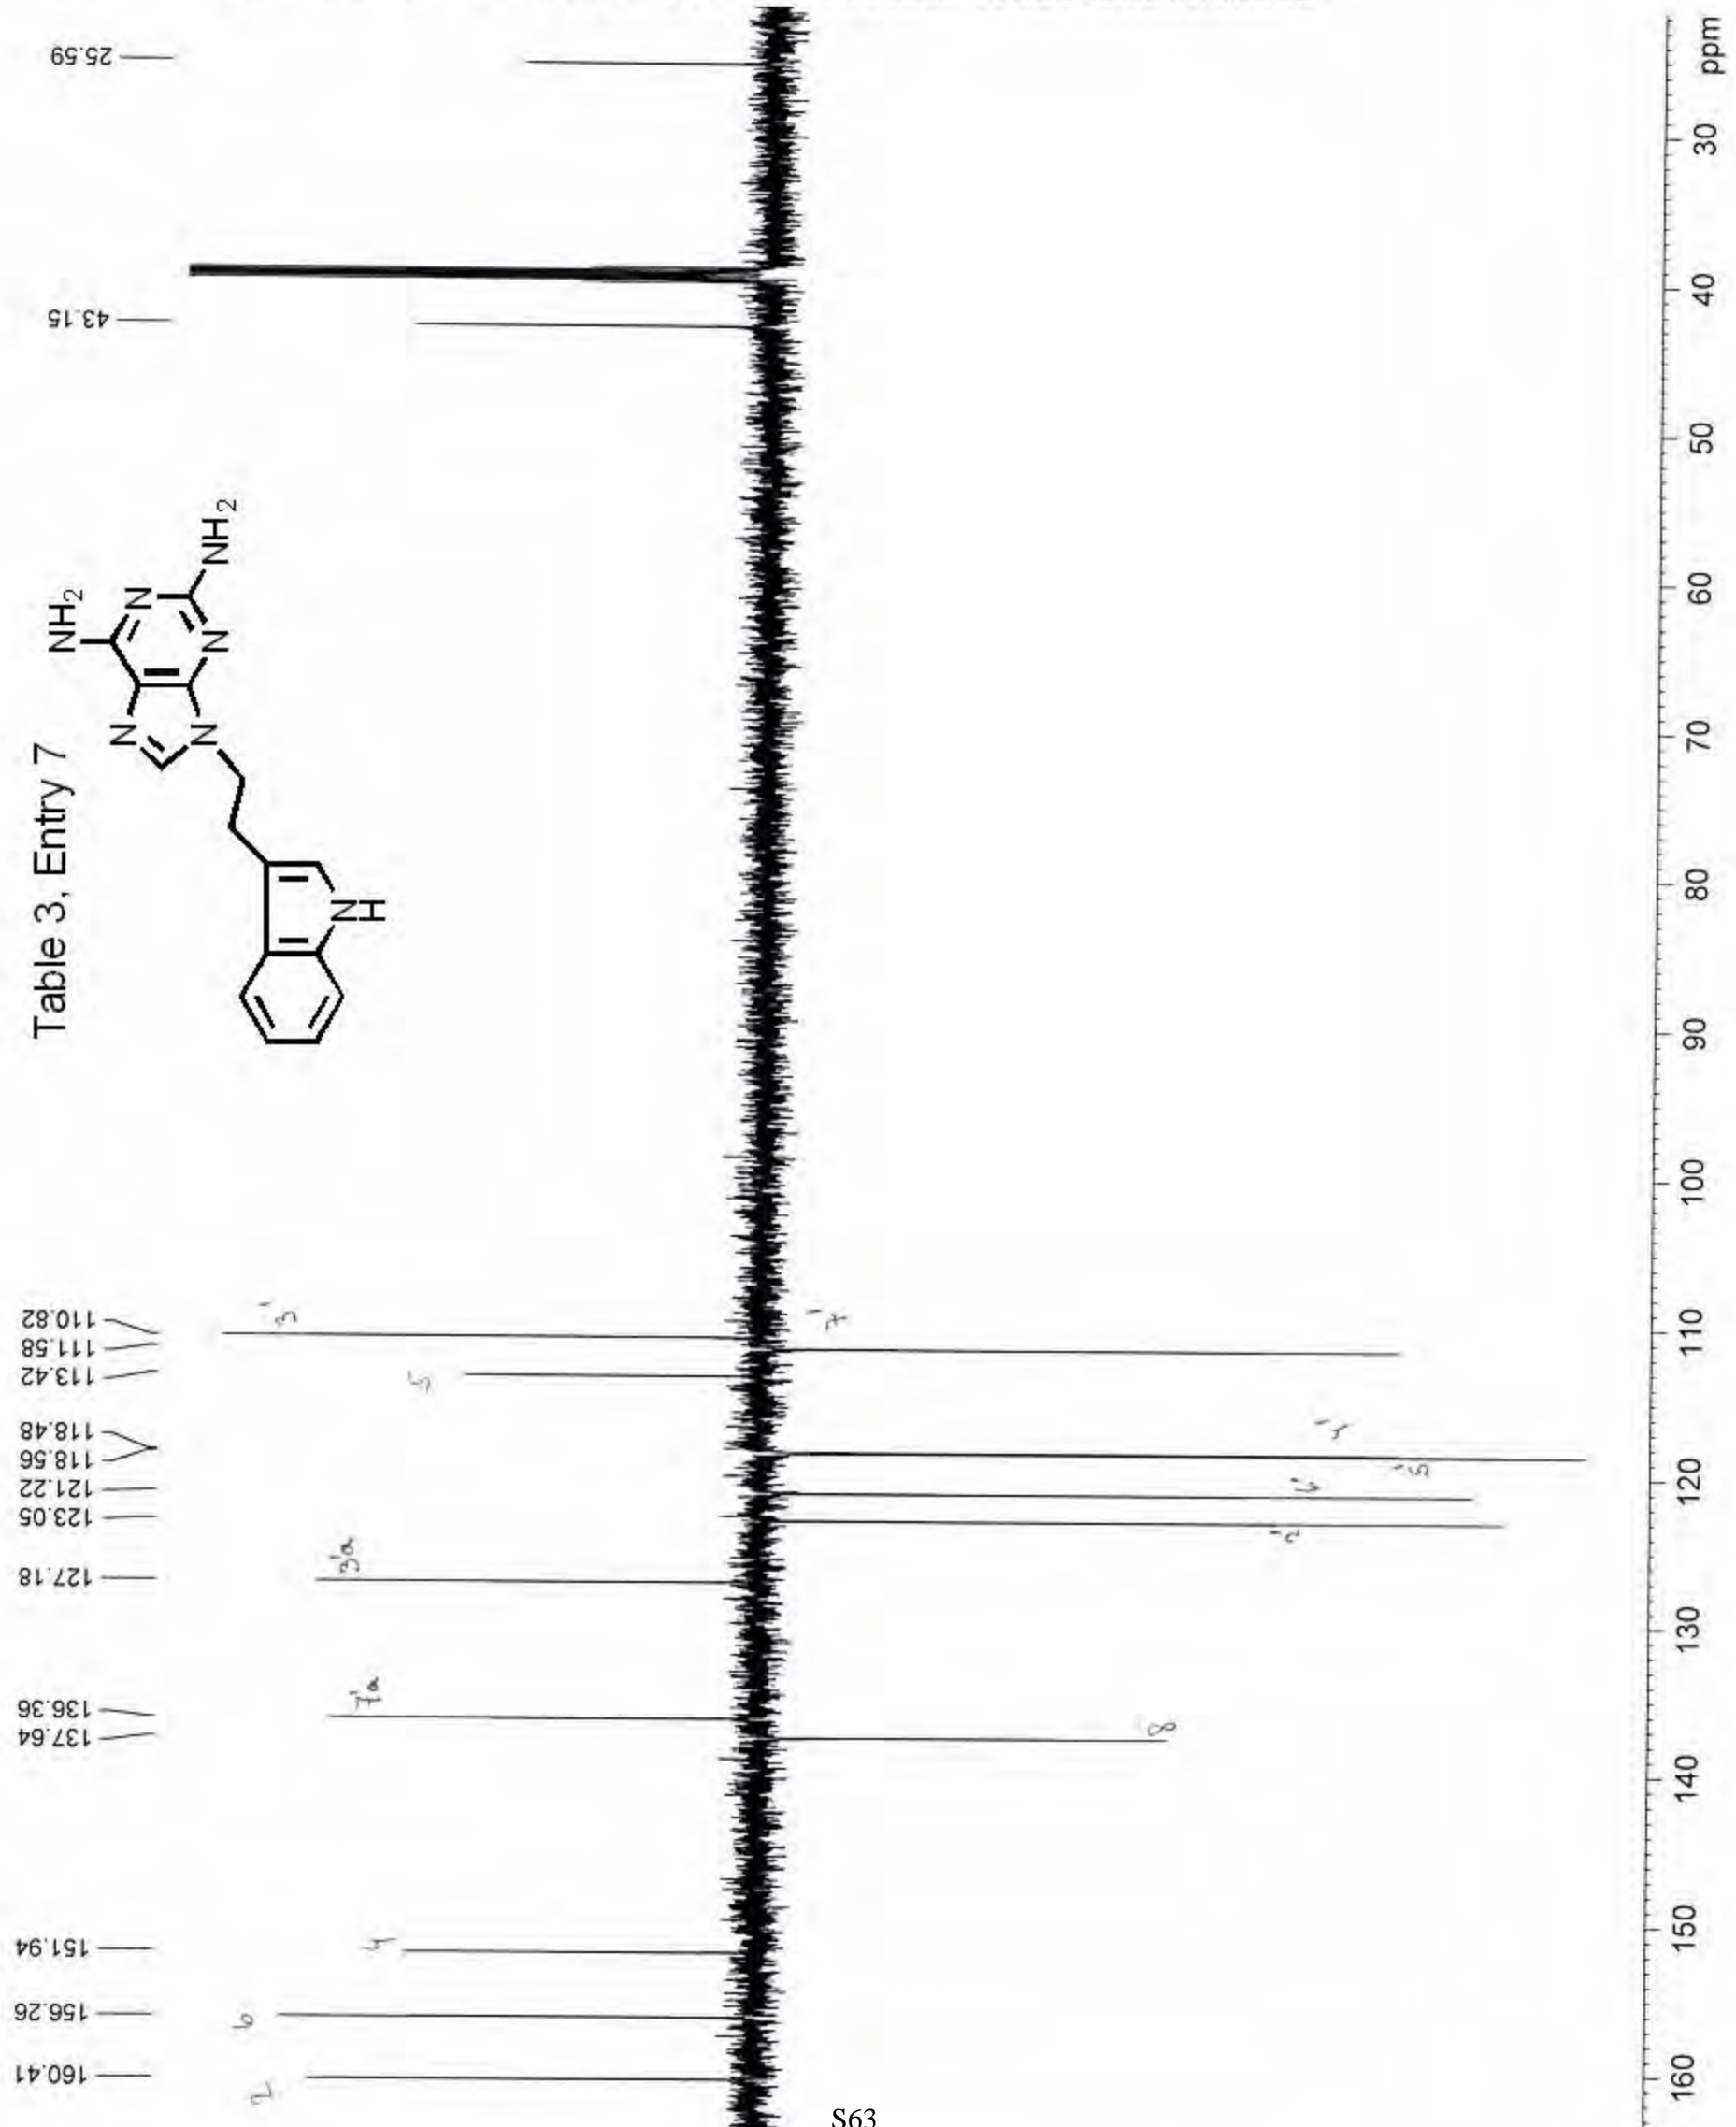





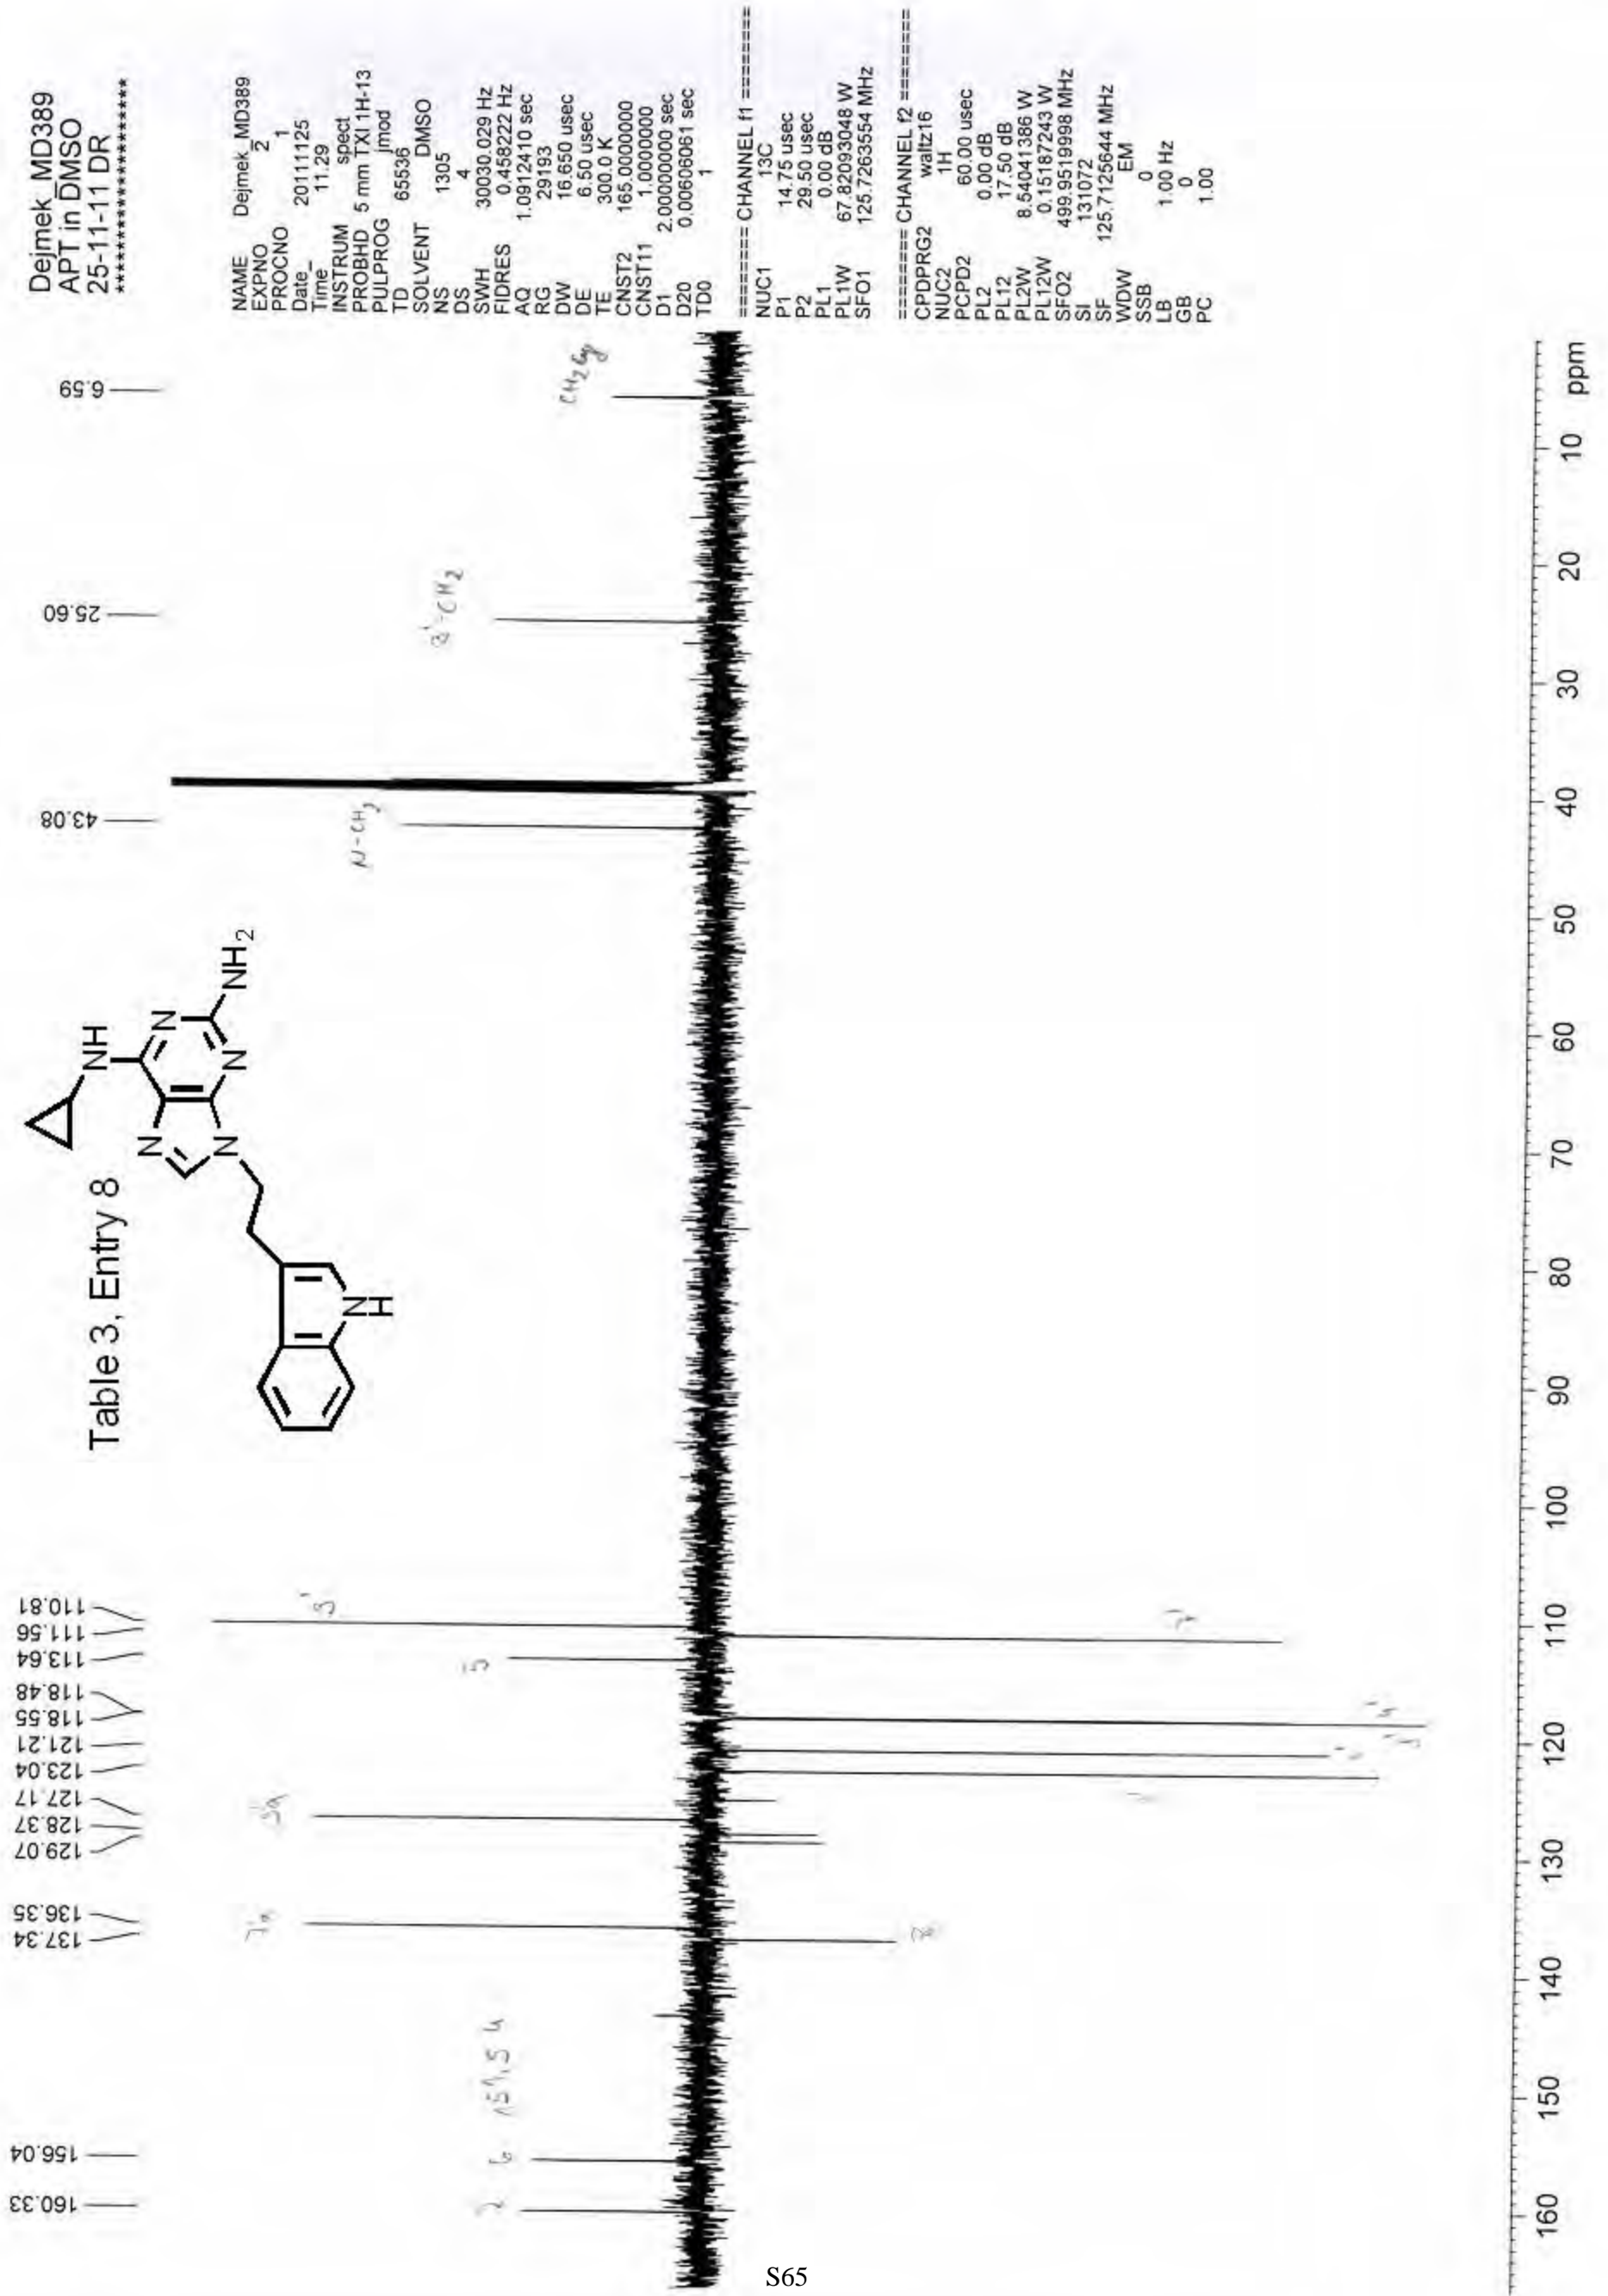

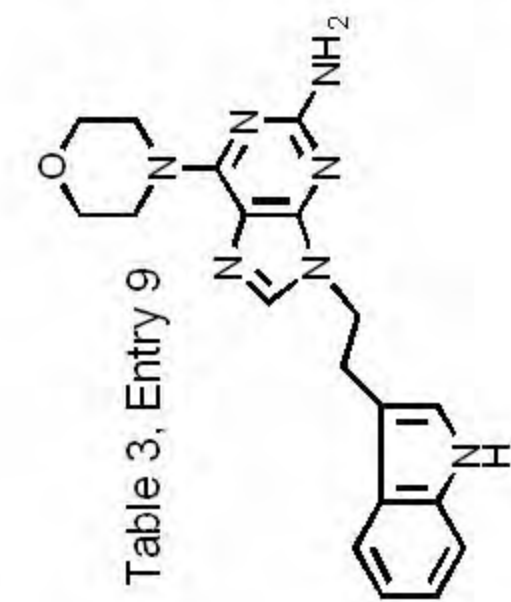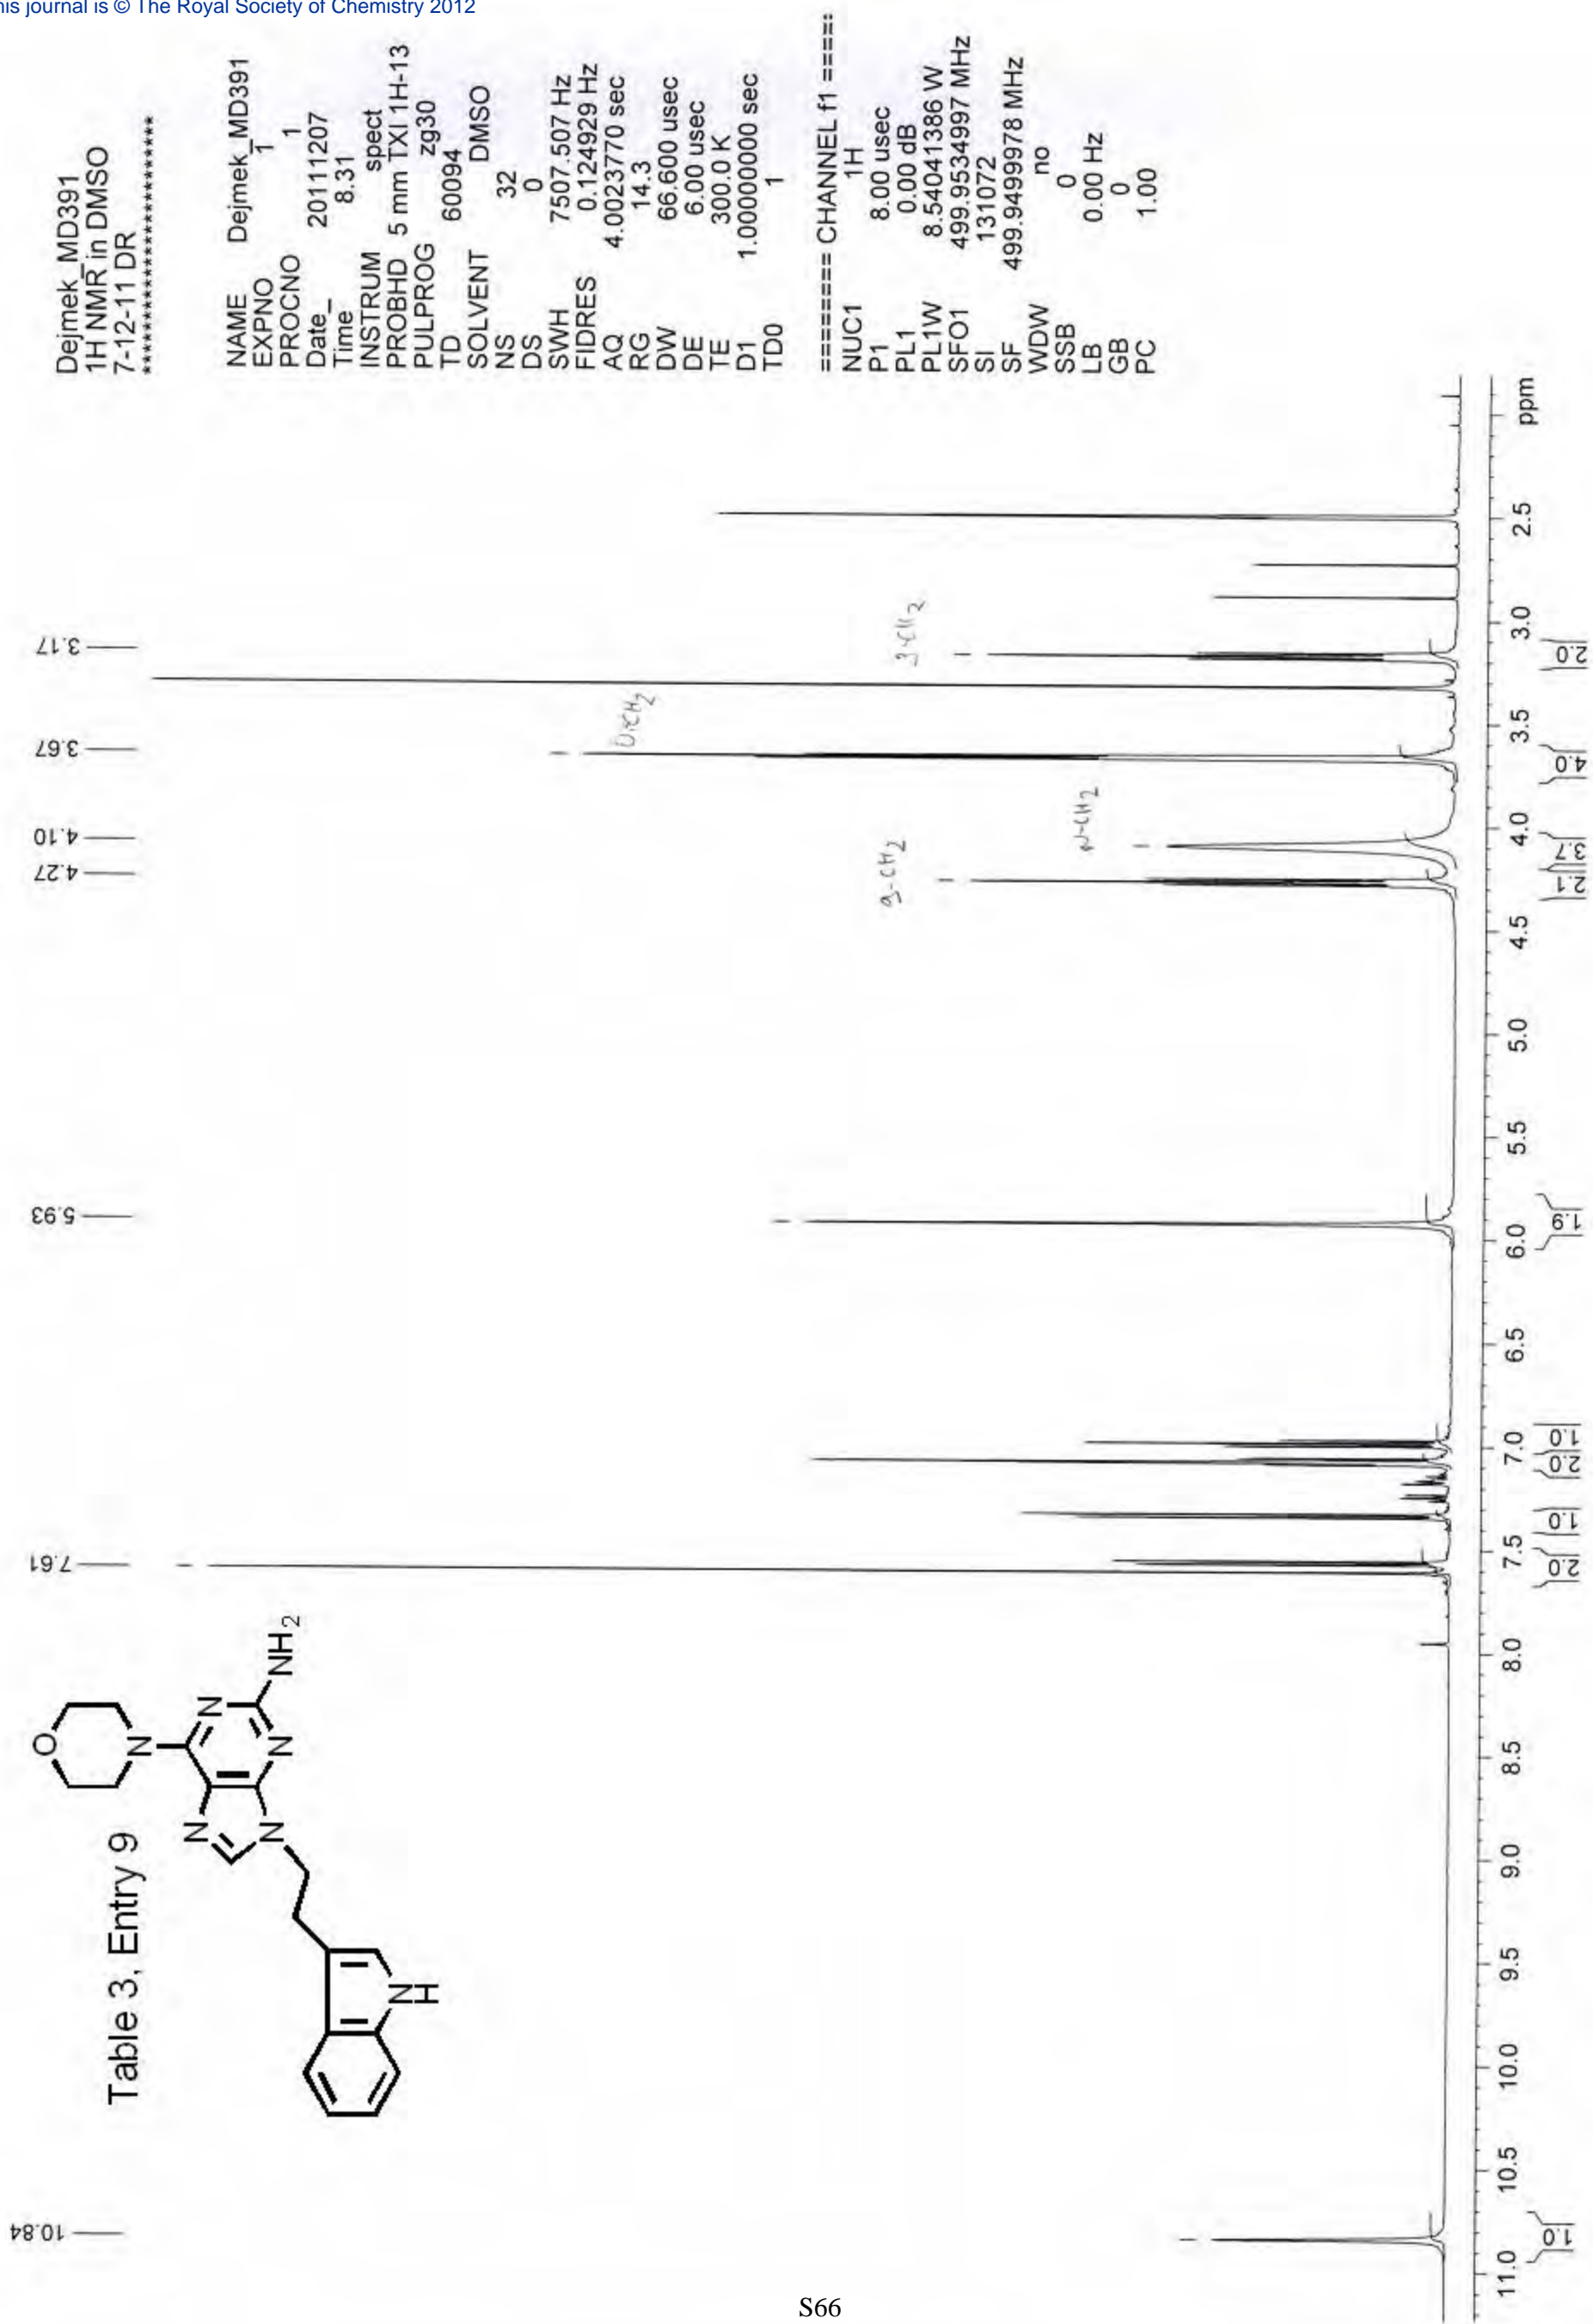

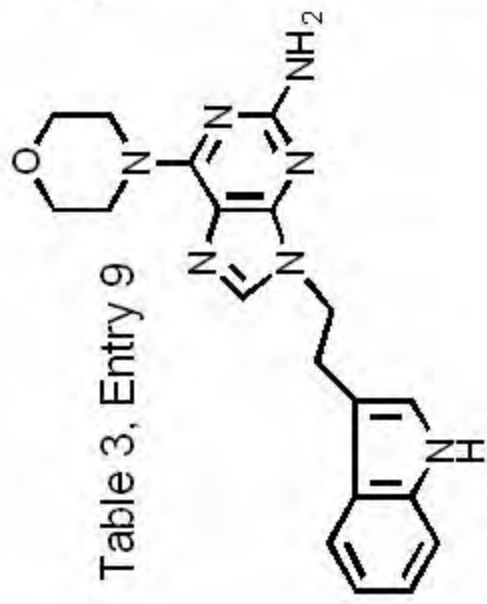

159.69  
 153.84  
 153.28  
 137.07  
 136.35  
 127.16  
 123.08  
 121.22  
 118.55  
 118.48  
 113.64  
 111.57  
 110.72

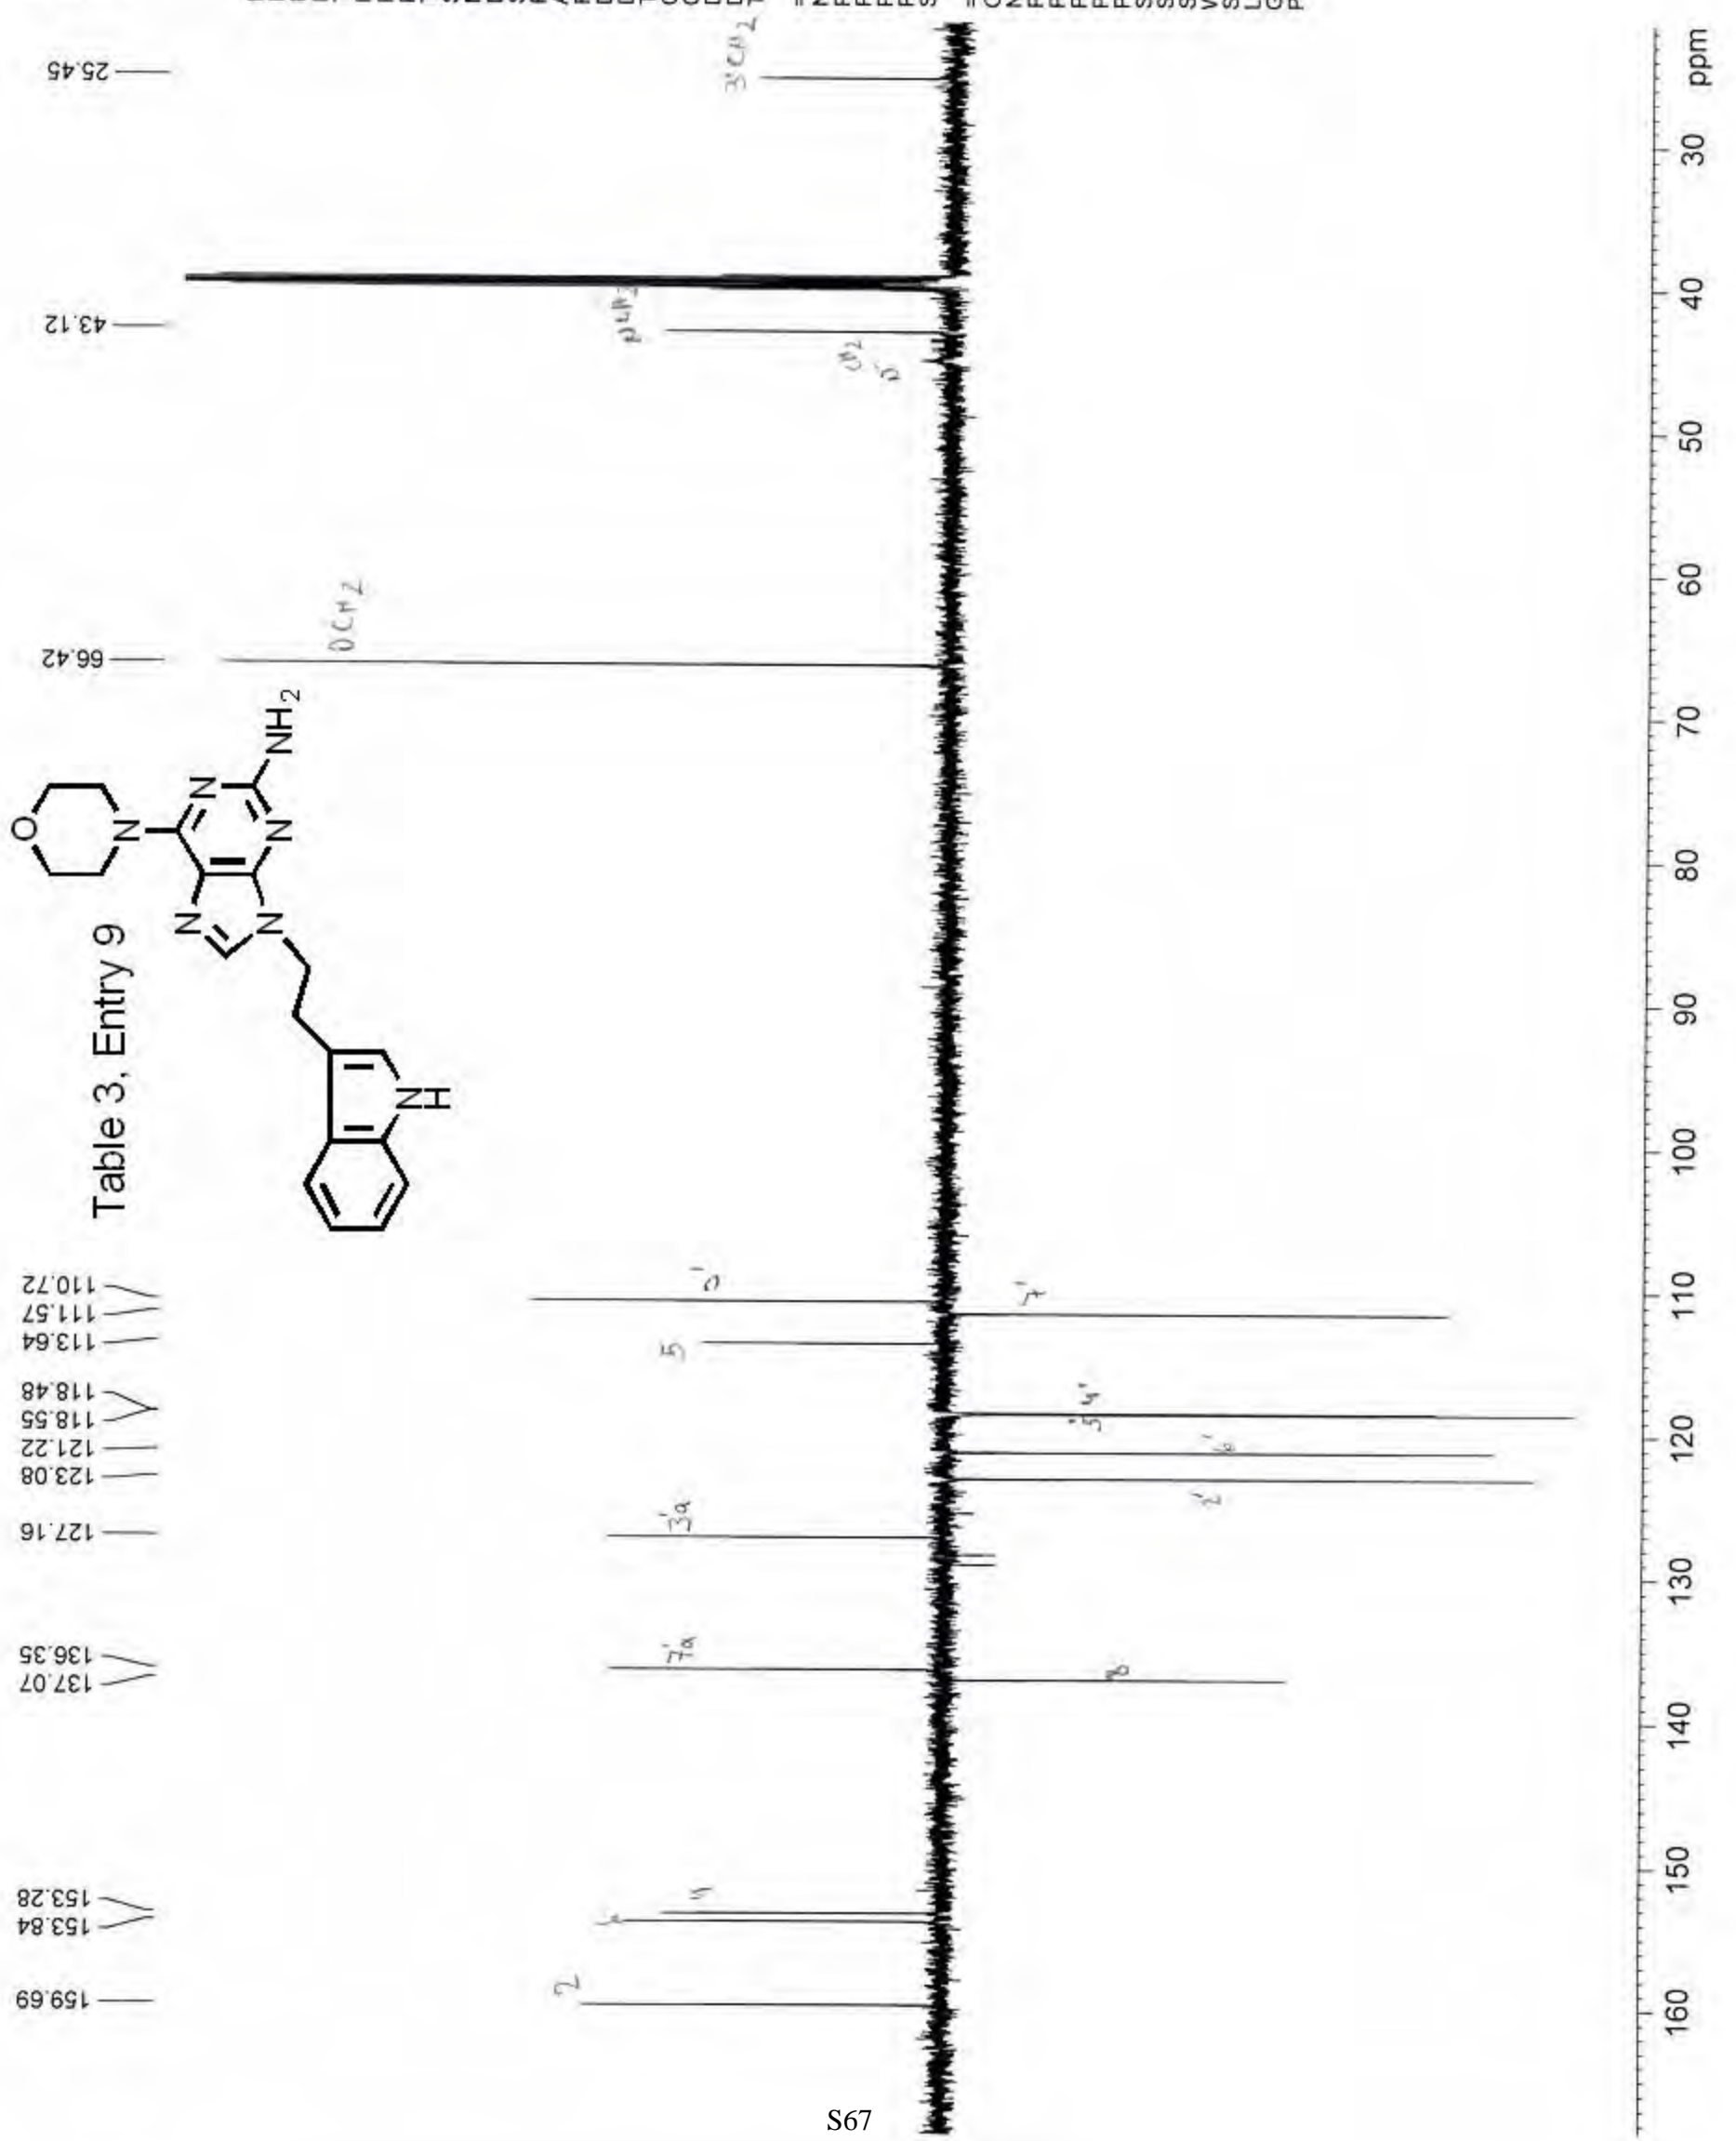

Dejmek\_MD391  
 APT in DMSO  
 7-12-11 DR  
 \*\*\*\*\*

NAME Dejmek\_MD391  
 EXPNO 2  
 PROCNO 1  
 Date\_ 20111207  
 Time\_ 9.39  
 INSTRUM spect  
 PROBHD 5 mm TXI 1H-13  
 PULPROG jmod  
 TD 65536  
 SOLVENT DMSO  
 NS 1289  
 DS 4  
 SWH 30030.029 Hz  
 FIDRES 0.458222 Hz  
 AQ 1.0912410 sec  
 RG 29193  
 DW 16.650 usec  
 DE 6.50 usec  
 TE 300.0 K  
 CNST2 165.000000  
 CNST11 1.0000000  
 D1 2.00000000 sec  
 D20 0.00606061 sec  
 TD0 1

==== CHANNEL f1 =====  
 NUC1 13C  
 P1 14.75 usec  
 P2 29.50 usec  
 PL1 0.00 dB  
 PL1W 67.82093048 W  
 SFO1 125.7263554 MHz

==== CHANNEL f2 =====  
 CPDPRG2 waltz16  
 NUC2 1H  
 PCPD2 60.00 usec  
 PL2 0.00 dB  
 PL12 17.50 dB  
 PL2W 8.54041386 W  
 PL12W 0.15187243 W  
 SFO2 499.9519998 MHz  
 SI 131072  
 SF 125.7125646 MHz  
 WDW EM  
 SSB 0  
 LB 1.00 Hz  
 GB 0  
 PC 1.00

Dejmek\_MD392  
1H-NMR in DMSO  
2.12.2011 DR  
\*\*\*\*\*

NAME Dejmek\_MD392  
EXPNO 1  
PROCNO 1  
Date\_ 20111202  
Time\_ 11.22  
INSTRUM spect  
PROBHD 5 mm BBI 1H/D-  
PULPROG zg30  
TD 72114  
SOLVENT DMSO  
NS 32  
DS 0  
SWH 9014.423 Hz  
FIDRES 0.125002 Hz  
AQ 3.9999733 sec  
RG 9  
DW 55.467 usec  
DE 20.00 usec  
TE 300.0 K  
D1 1.00000000 sec  
TD0 1

==== CHANNEL f1 =====  
NUC1 1H  
P1 11.95 usec  
PL1 2.33 dB  
PL1W 19.97739792 W  
SFO1 600.1342009 MHz  
SI 131072  
SF 600.1300067 MHz  
WDW no  
SSB 0  
LB 0.00 Hz  
GB 0  
PC 0.50

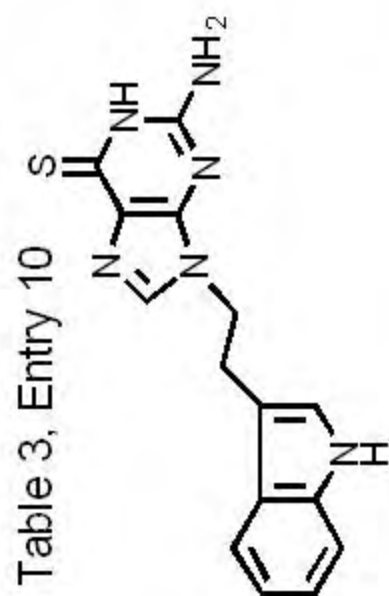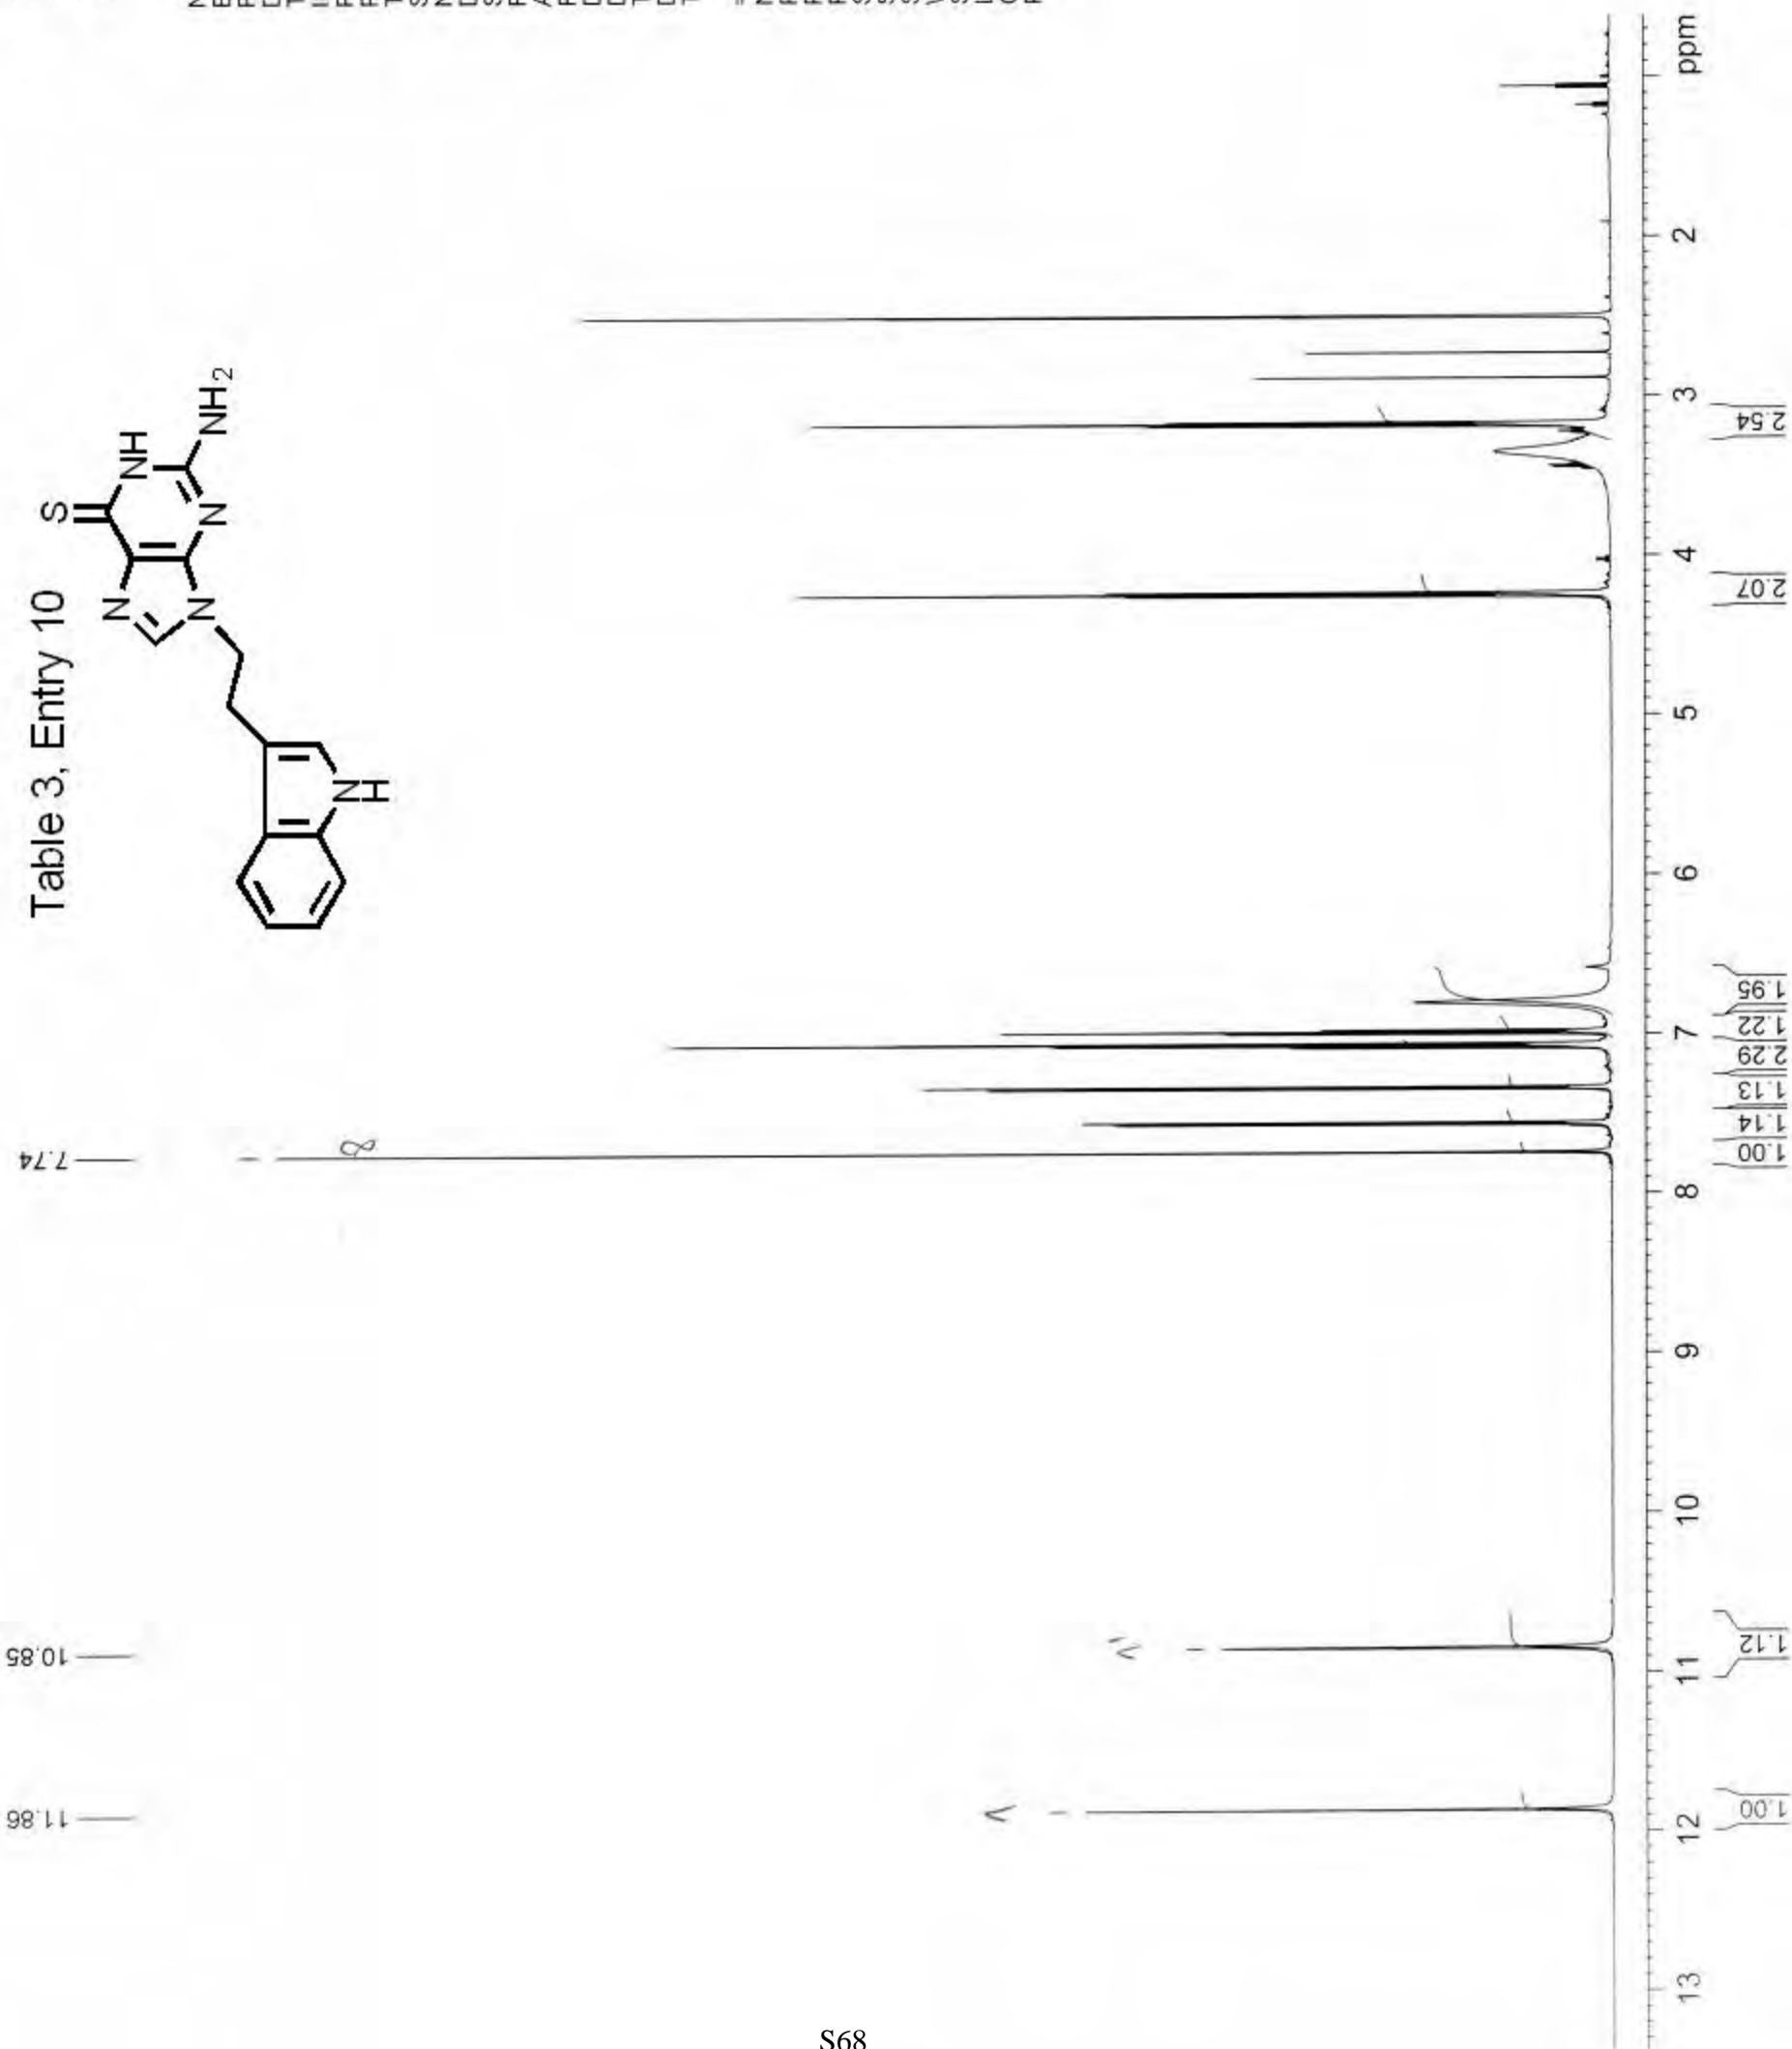

Dejmek\_MD392  
 APT in DMSO  
 2.12.2011 DR  
 \*\*\*\*\*

NAME Dejmek\_MD392  
 EXPNO 2  
 PROCNO 1  
 Date\_ 20111202  
 Time\_ 12.22  
 INSTRUM spect  
 PROBHD 5 mm BBI 1H/D-  
 PULPROG jmod  
 TD 75752  
 SOLVENT DMSO  
 NS 1186  
 DS 4  
 SWH 37878.789 H  
 FIDRES 0.500037 H  
 AQ 0.9999764 S  
 RG 16400  
 DW 13.200 u  
 DE 6.00 u  
 TE 300.0 K  
 CNST2 165.0000000  
 CNST11 1.0000000  
 D1 2.0000000 S  
 D20 0.00606061 S  
 TD0 1

==== CHANNEL f1 =====  
 NUC1 13C  
 P1 13.25 u  
 P2 26.50 u  
 PL1 -2.10 d  
 PL1W 126.28787994 W  
 SFO1 150.9194083 M

==== CHANNEL f2 =====  
 CPDPRG2 waltz16  
 NUC2 1H  
 PCPD2 80.00 u  
 PL2 2.33 d  
 PL12 18.84 d  
 PL2W 19.97739792 W  
 PL12W 0.44620958 W  
 SFO2 600.1324005 M  
 SI 131072  
 SF 150.9028595 M  
 WDW EM  
 SSE 0  
 LB 1.00 H  
 GB 0  
 PC 1.40

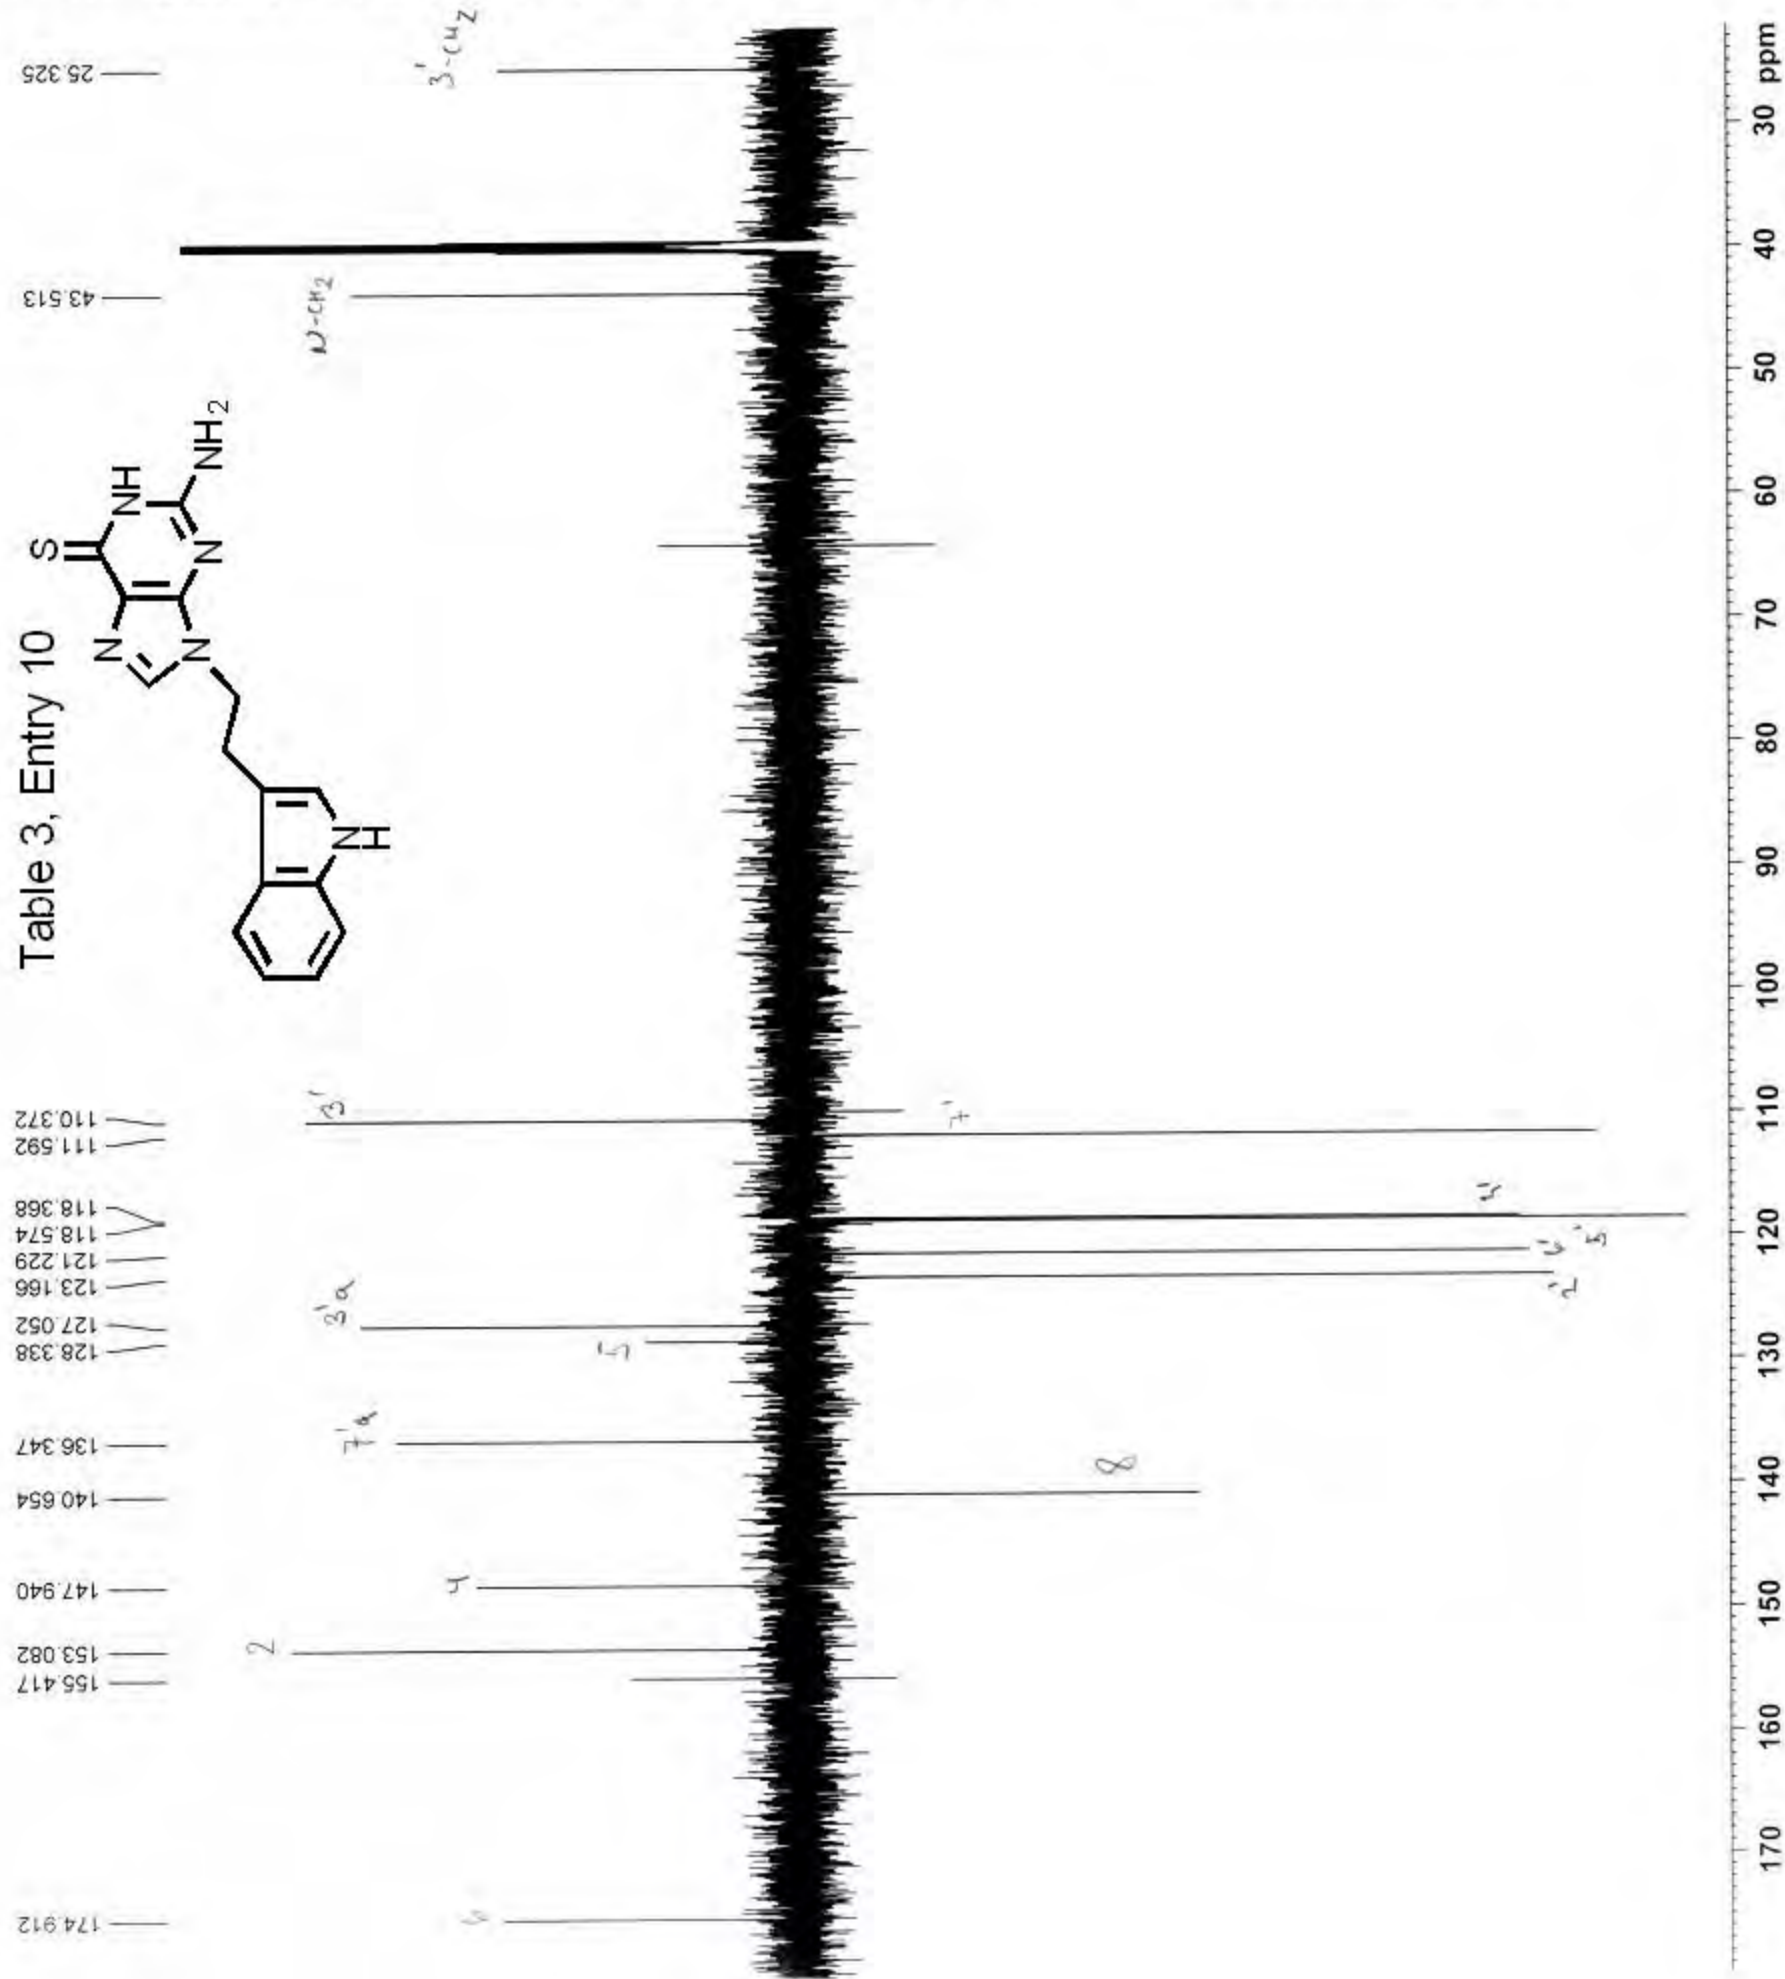

Dejmek\_MD393  
1H NMR in DMSO  
25-11-11 DR  
\*\*\*\*\*

NAME Dejmek\_MD393  
EXPNO 1  
PROCNO 1  
Date\_ 20111125  
Time\_ 8.17  
INSTRUM spect  
PROBHD 5 mm TXI 1H-  
PULPROG zg30  
TD 60094  
SOLVENT DMSO  
NS 32  
DS 0  
SWH 7507.507 Hz  
FIDRES 0.124929 Hz  
AQ 4.0023770 sec  
RG 14.3  
DW 66.600 usec  
DE 6.00 usec  
TE 300.0 K  
D1 1.00000000 sec  
TD0 1

==== CHANNEL f1 =  
NUC1 1H  
P1 8.00 usec  
PL1 0.00 dB  
PL1W 8.54041386 V  
SFO1 499.9534997 M  
SI 131072  
SF 499.9499979 MF  
WDW no  
SSB 0  
LB 0.00 Hz  
GB 0  
PC 1.00

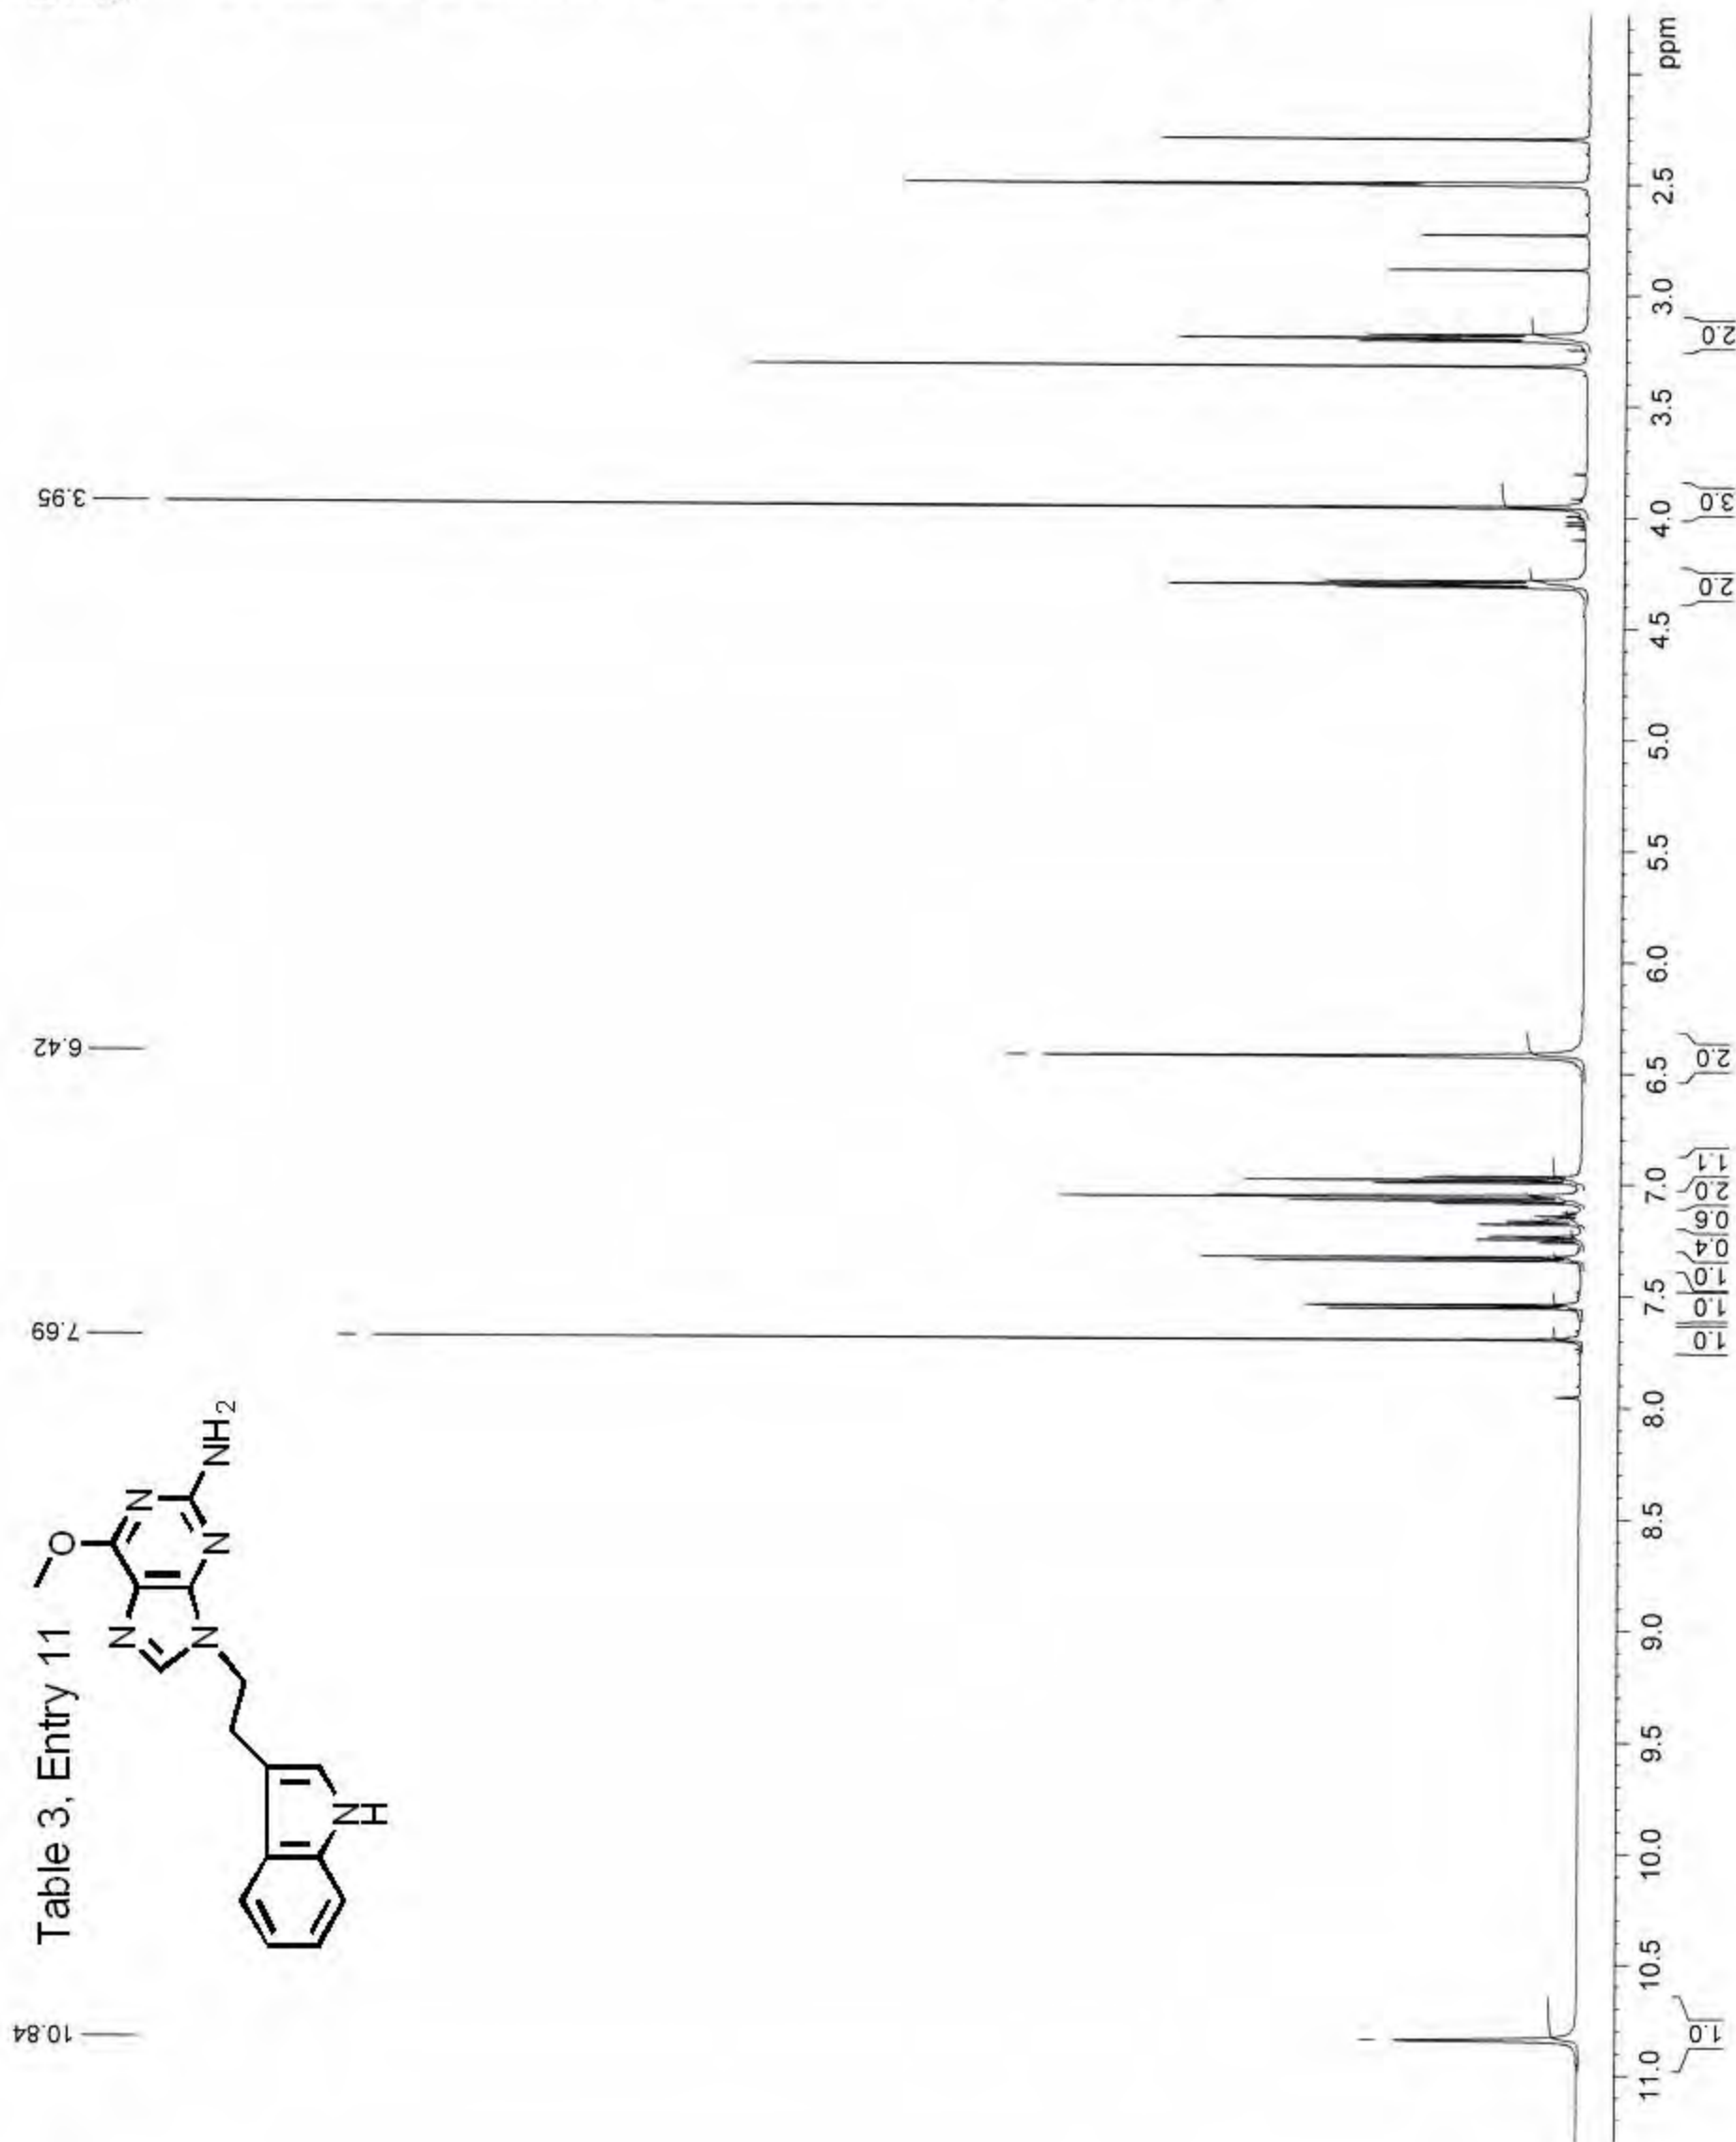



Table 3, Entry 12

Dejmek\_MD357  
1H NMR in DMSO  
5-10-11 DR  
\*\*\*\*\*

Current Data Parameters  
NAME Dejmek\_MD357  
EXPNO 1  
PROCNO 1  
F2 - Acquisition Parameters  
Date\_ 20111005  
Time 16.54  
INSTRUM spect  
PROBHD 5 mm TXI 1H-13  
PULPROG zgpg30  
TD 65536  
SOLVENT DMSO  
NS 32  
DS 0  
SWH 7507.507 Hz  
FIDRES 0.124929 Hz  
AQ 4.0023770 sec  
RG 14.3  
DN 66.600 usec  
DE 6.00 usec  
TE 300.0 K  
D1 1.00000000 sec  
TD0 1  
===== CHANNEL f1 =====  
NUC1 1H  
P1 9.00 usec  
PL1 3.00 dB  
PL1W 4.28034639 W  
SFO1 499.9534997 MHz  
F2 - Processing parameters  
SI 131072  
SF 499.9500006 MHz  
WDW nc  
SSB 0  
LB 0.00 Hz  
GB 0  
PC 1.00

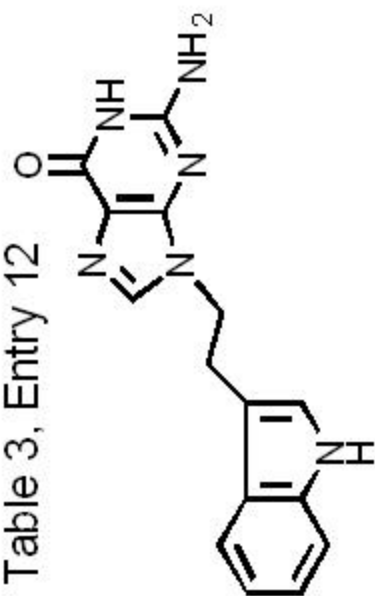

10.84  
10.54

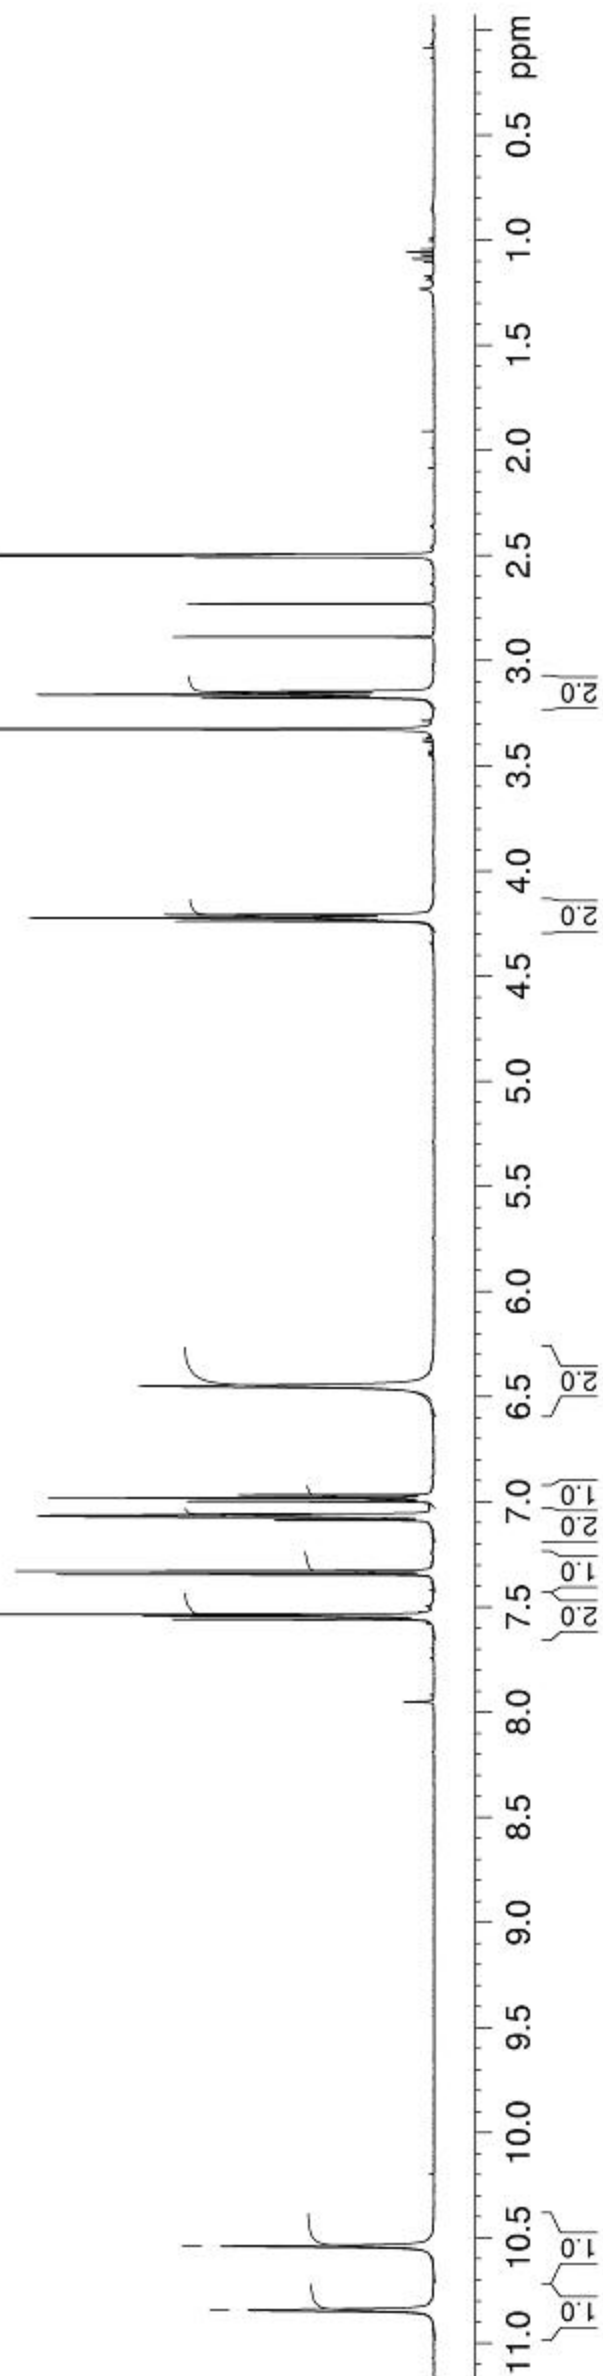



Dejmek\_MD357  
APT in DMSO  
5-10-11 DR  
\*\*\*\*\*

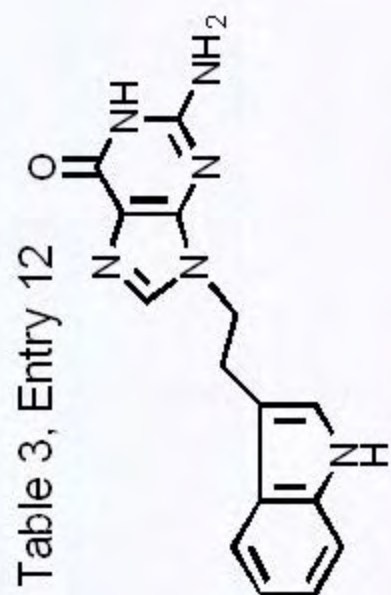

NAME Dejmek\_MD357  
EXPNO 2  
PROCNO 1  
Date\_ 20111005  
Time 17.05  
INSTRUM spect  
PROBHD 5 mm TXI 1H-13  
PULPROG jmod  
TD 65536  
SOLVENT DMSO  
NS 923  
DS 4  
SWH 30030.029 Hz  
FIDRES 0.458222 Hz  
AQ 1.0912410 sec  
RG 29193  
DW 16.650 usec  
DE 6.50 usec  
TE 300.0 K  
CNST2 165.0000000  
CNST11 1.0000000  
D1 2.00000000 sec  
D20 0.00606061 sec  
TD0 1  
===== CHANNEL f1 =====  
NUC1 13C  
P1 14.50 usec  
P2 29.00 usec  
PL1 0.00 dB  
PL1W 67.82093048 W  
SFO1 125.7263554 MHz  
===== CHANNEL f2 =====  
CPDPRG2 waltz16  
NUC2 1H  
PCPD2 60.00 usec  
PL2 3.00 dB  
PL12 19.48 dB  
PL2W 4.28034639 W  
PL12W 0.09626734 W  
SFO2 499.9519998 MHz  
SI 131072  
SF 125.7125652 MHz  
WDW EM  
SSB 0  
LB 1.00 Hz  
GB 0  
PC 1.00

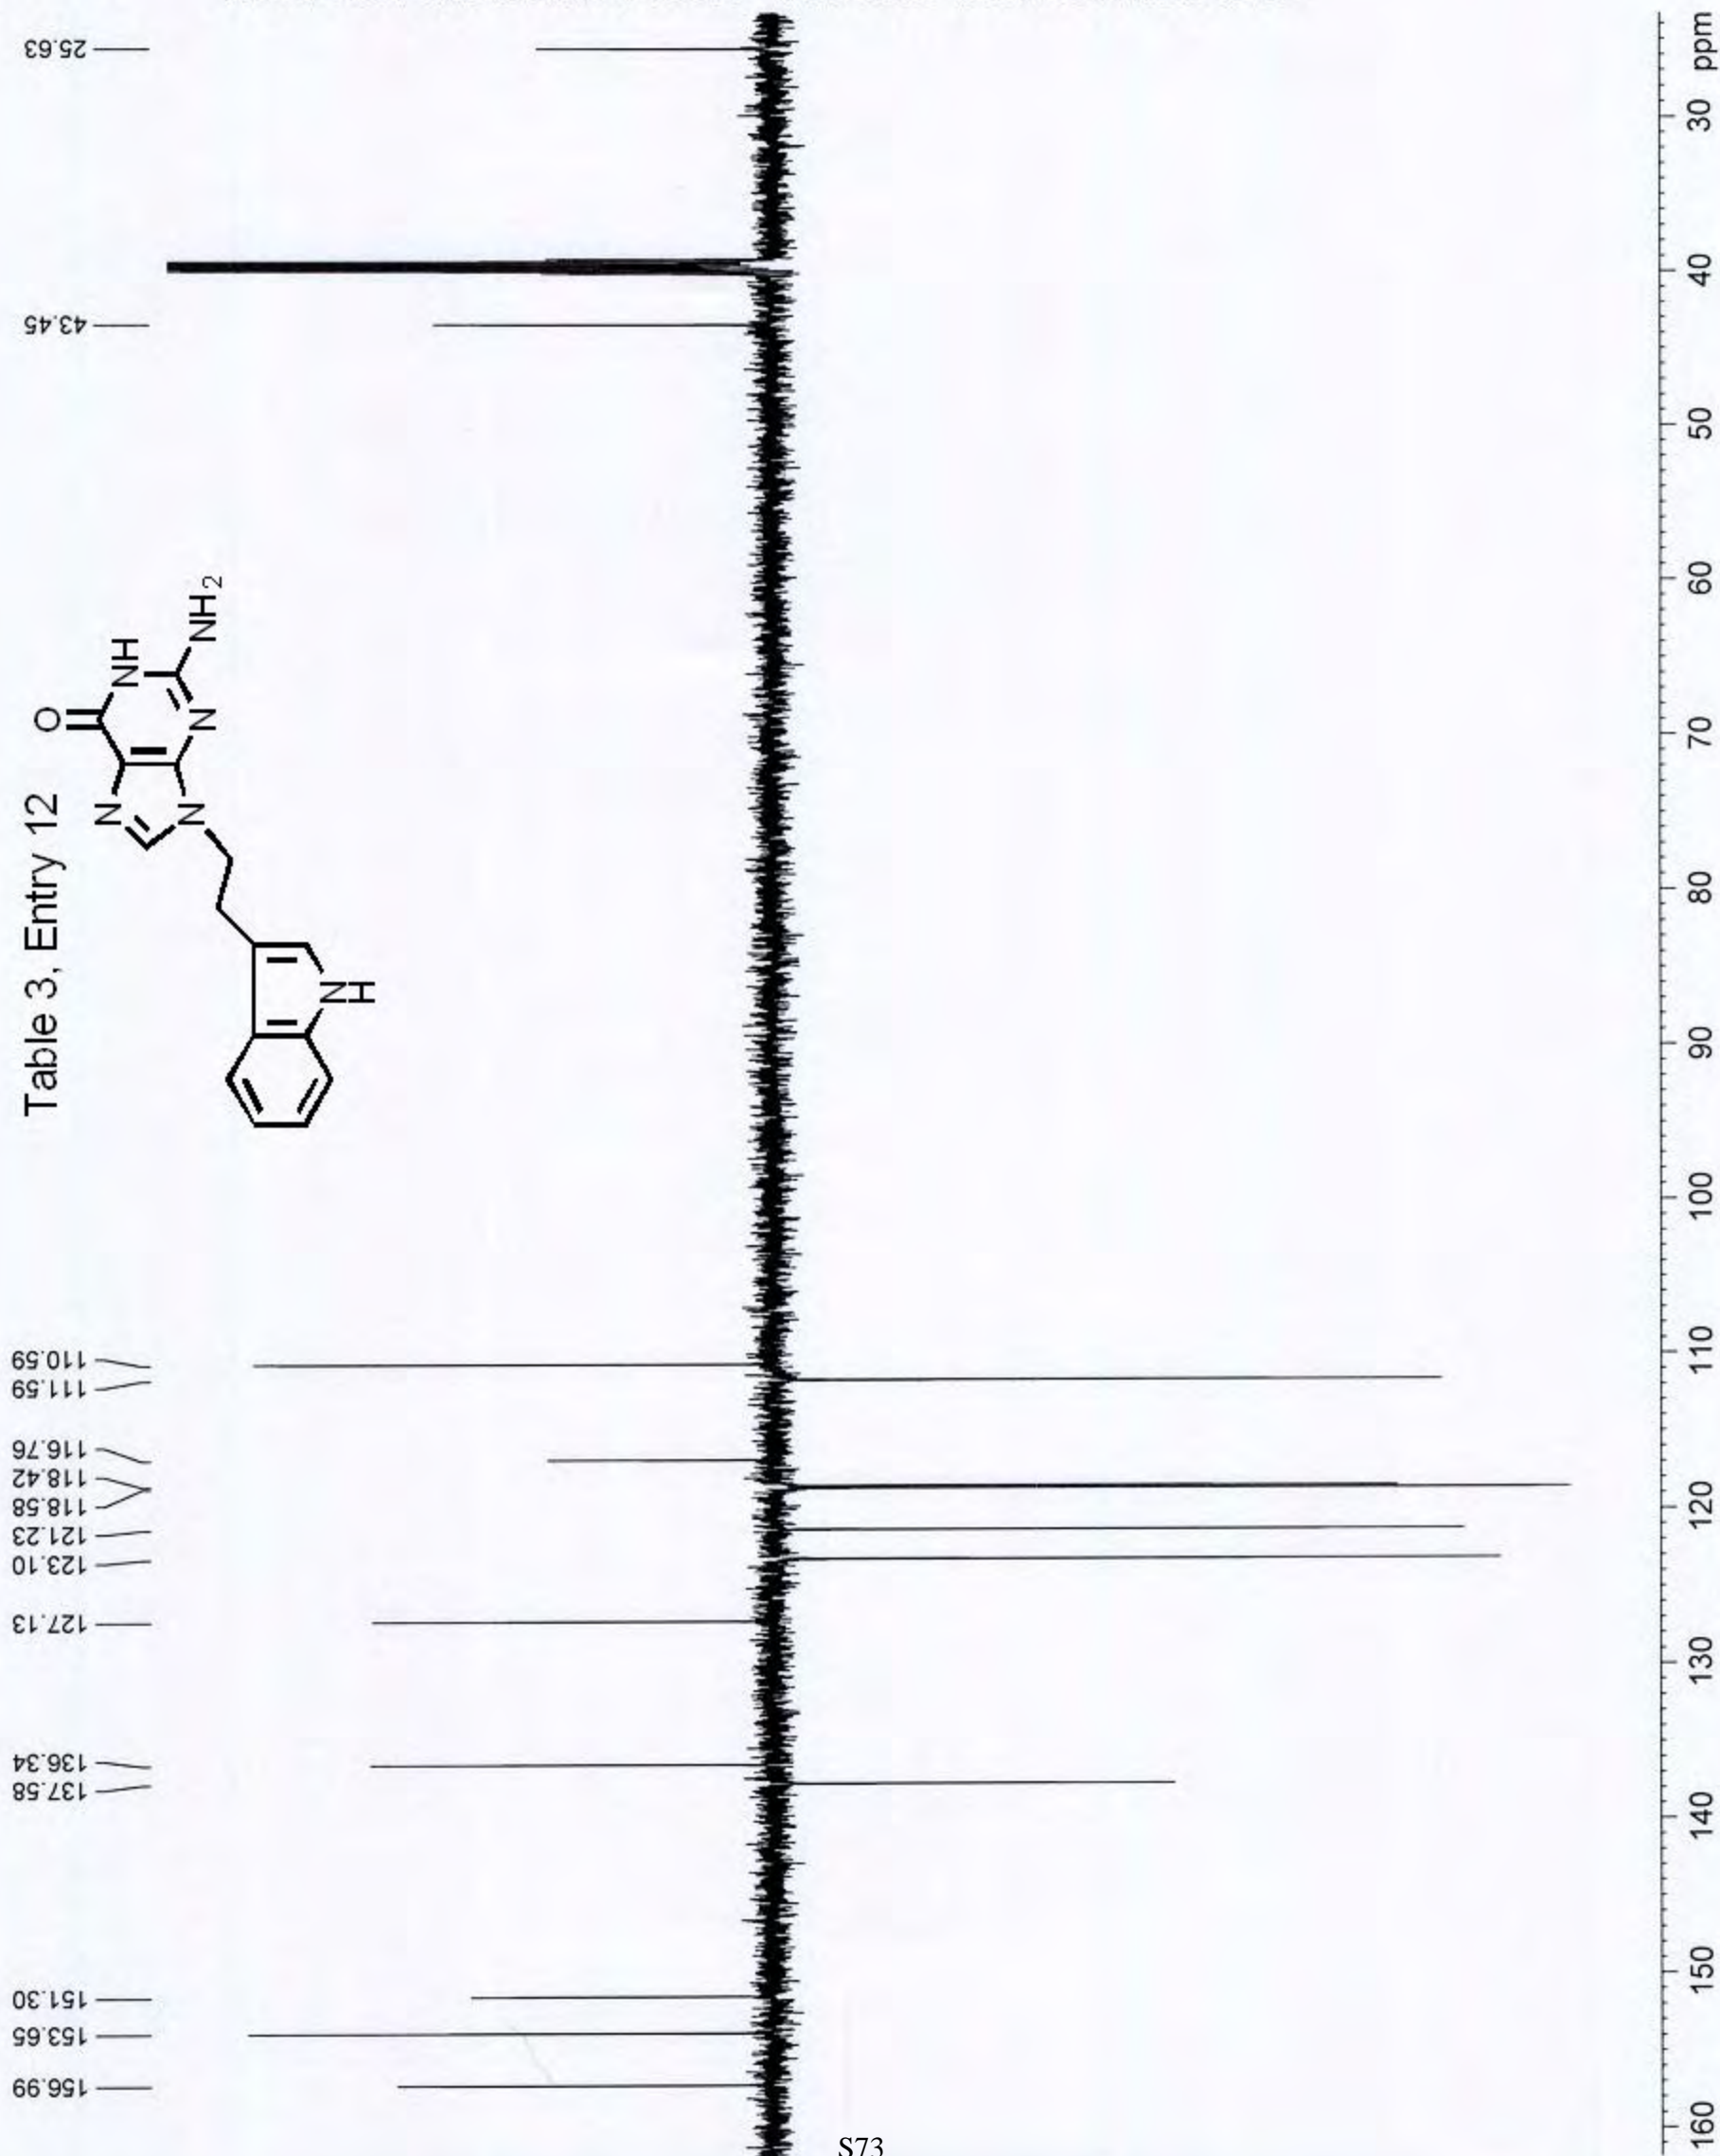

File : D:\Data\MD\_A1.D  
Operator : Dejmek  
Acquired : 1 Mar 2012 16:42  
Instrument : 6890N + 5975B  
Sample Name: MD\_A1  
Misc Info :  
Vial Number: 1

using AcqMethod AS\_M-VYSOKE\_C-VYSOKE.M

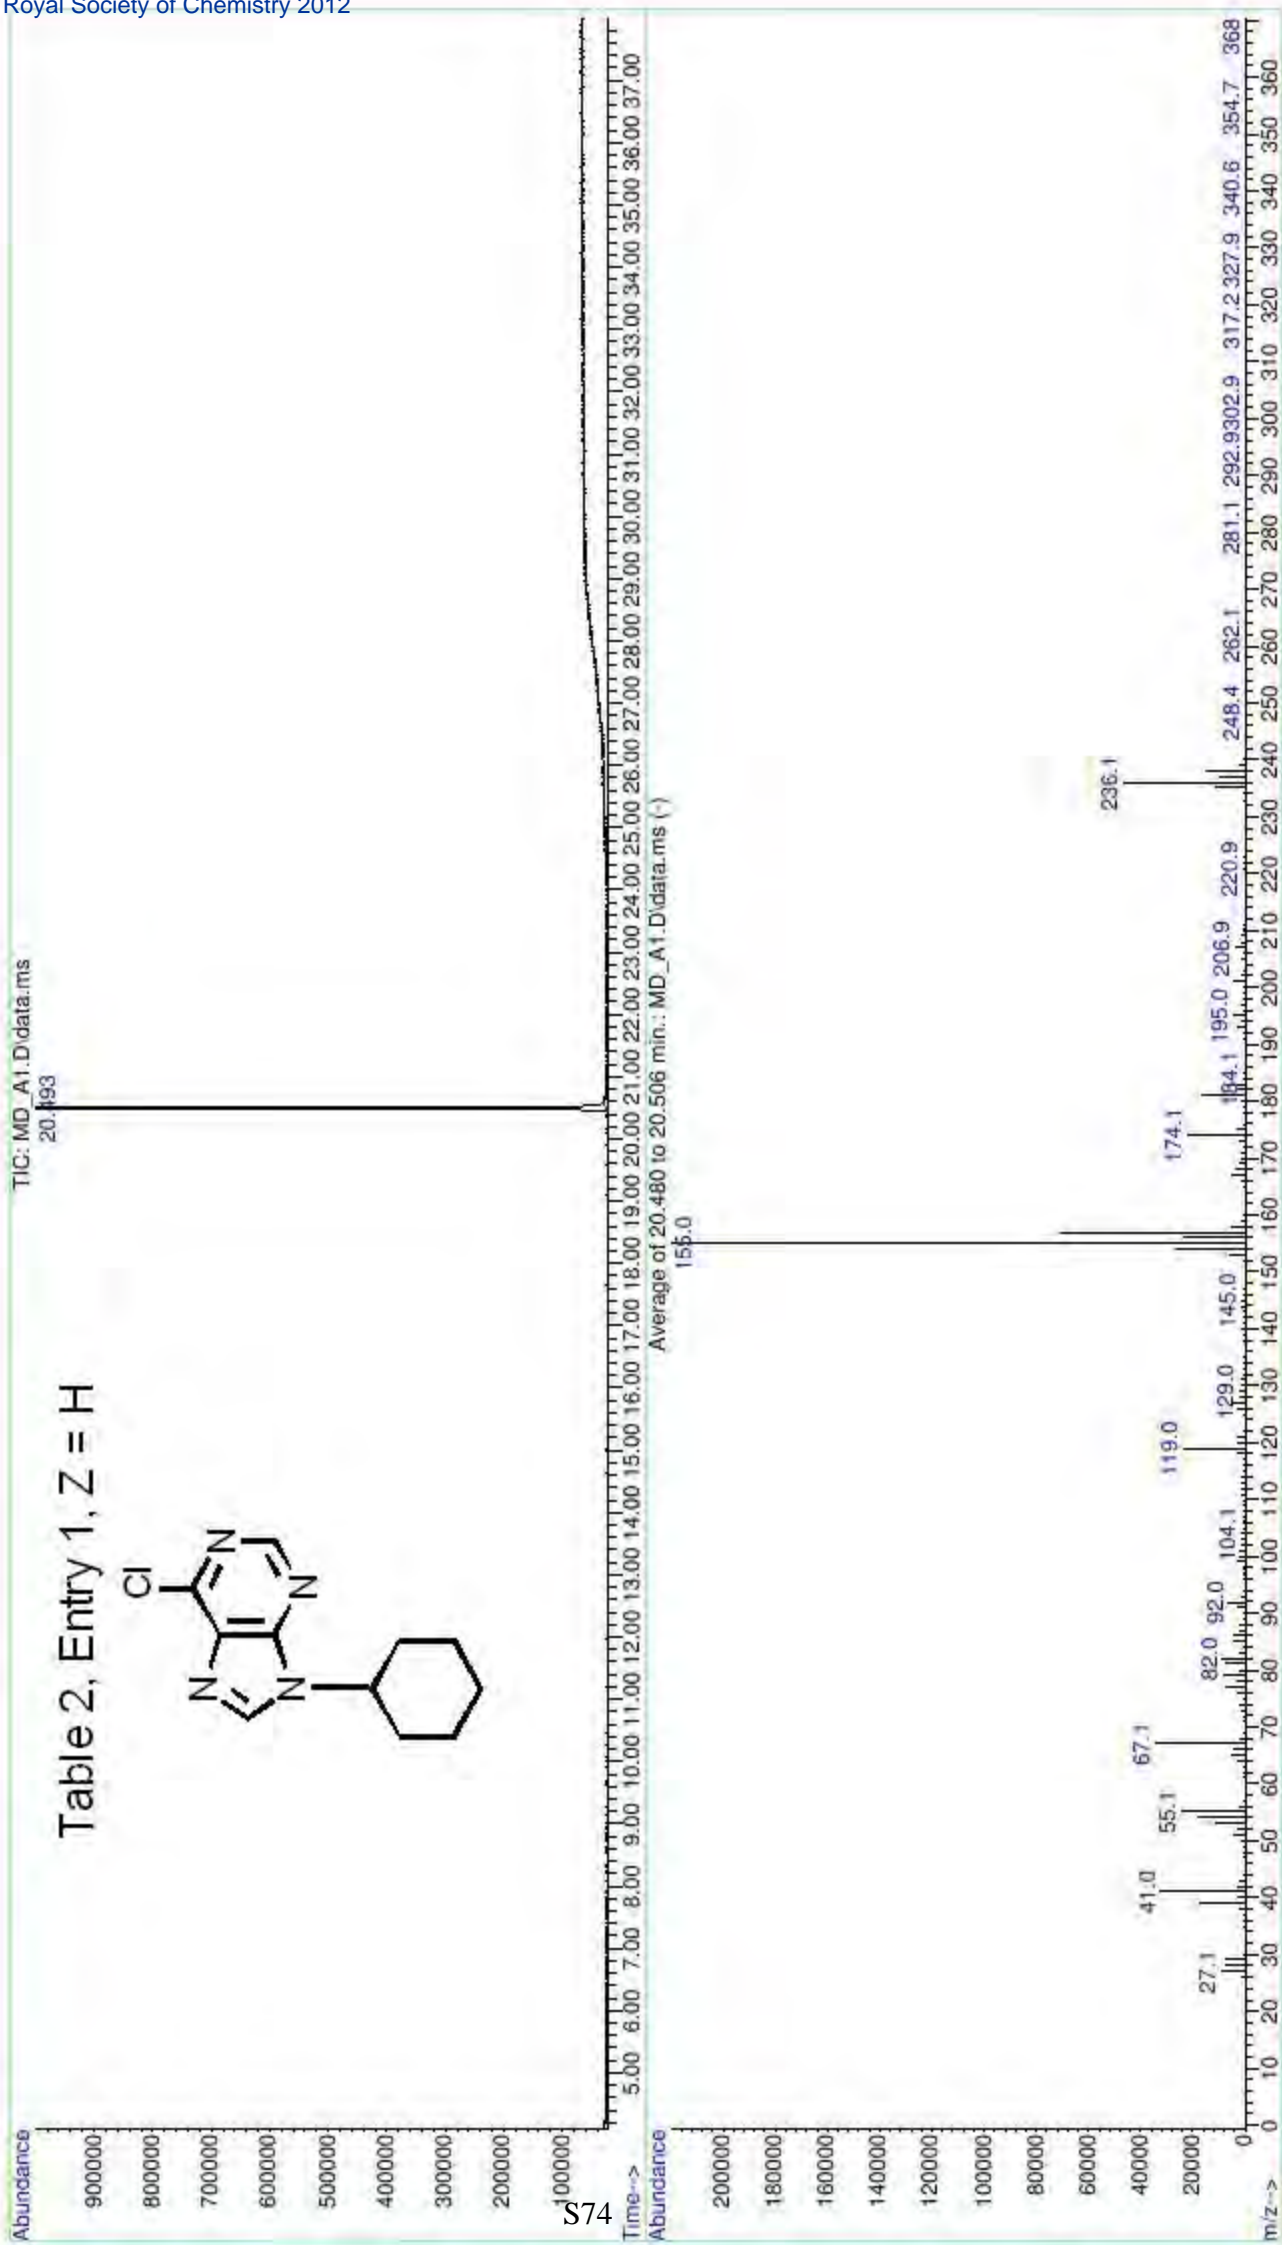

File : D:\Data\MD\_A2.D  
Operator : Dejmek  
Acquired : 1 Mar 2012 19:47  
Instrument : 6890N + 5975B  
Sample Name: MD\_A2  
Misc Info :  
Vial Number: 1

using AcqMethod AS\_M-VYSOKE\_C-VYSOKE.M

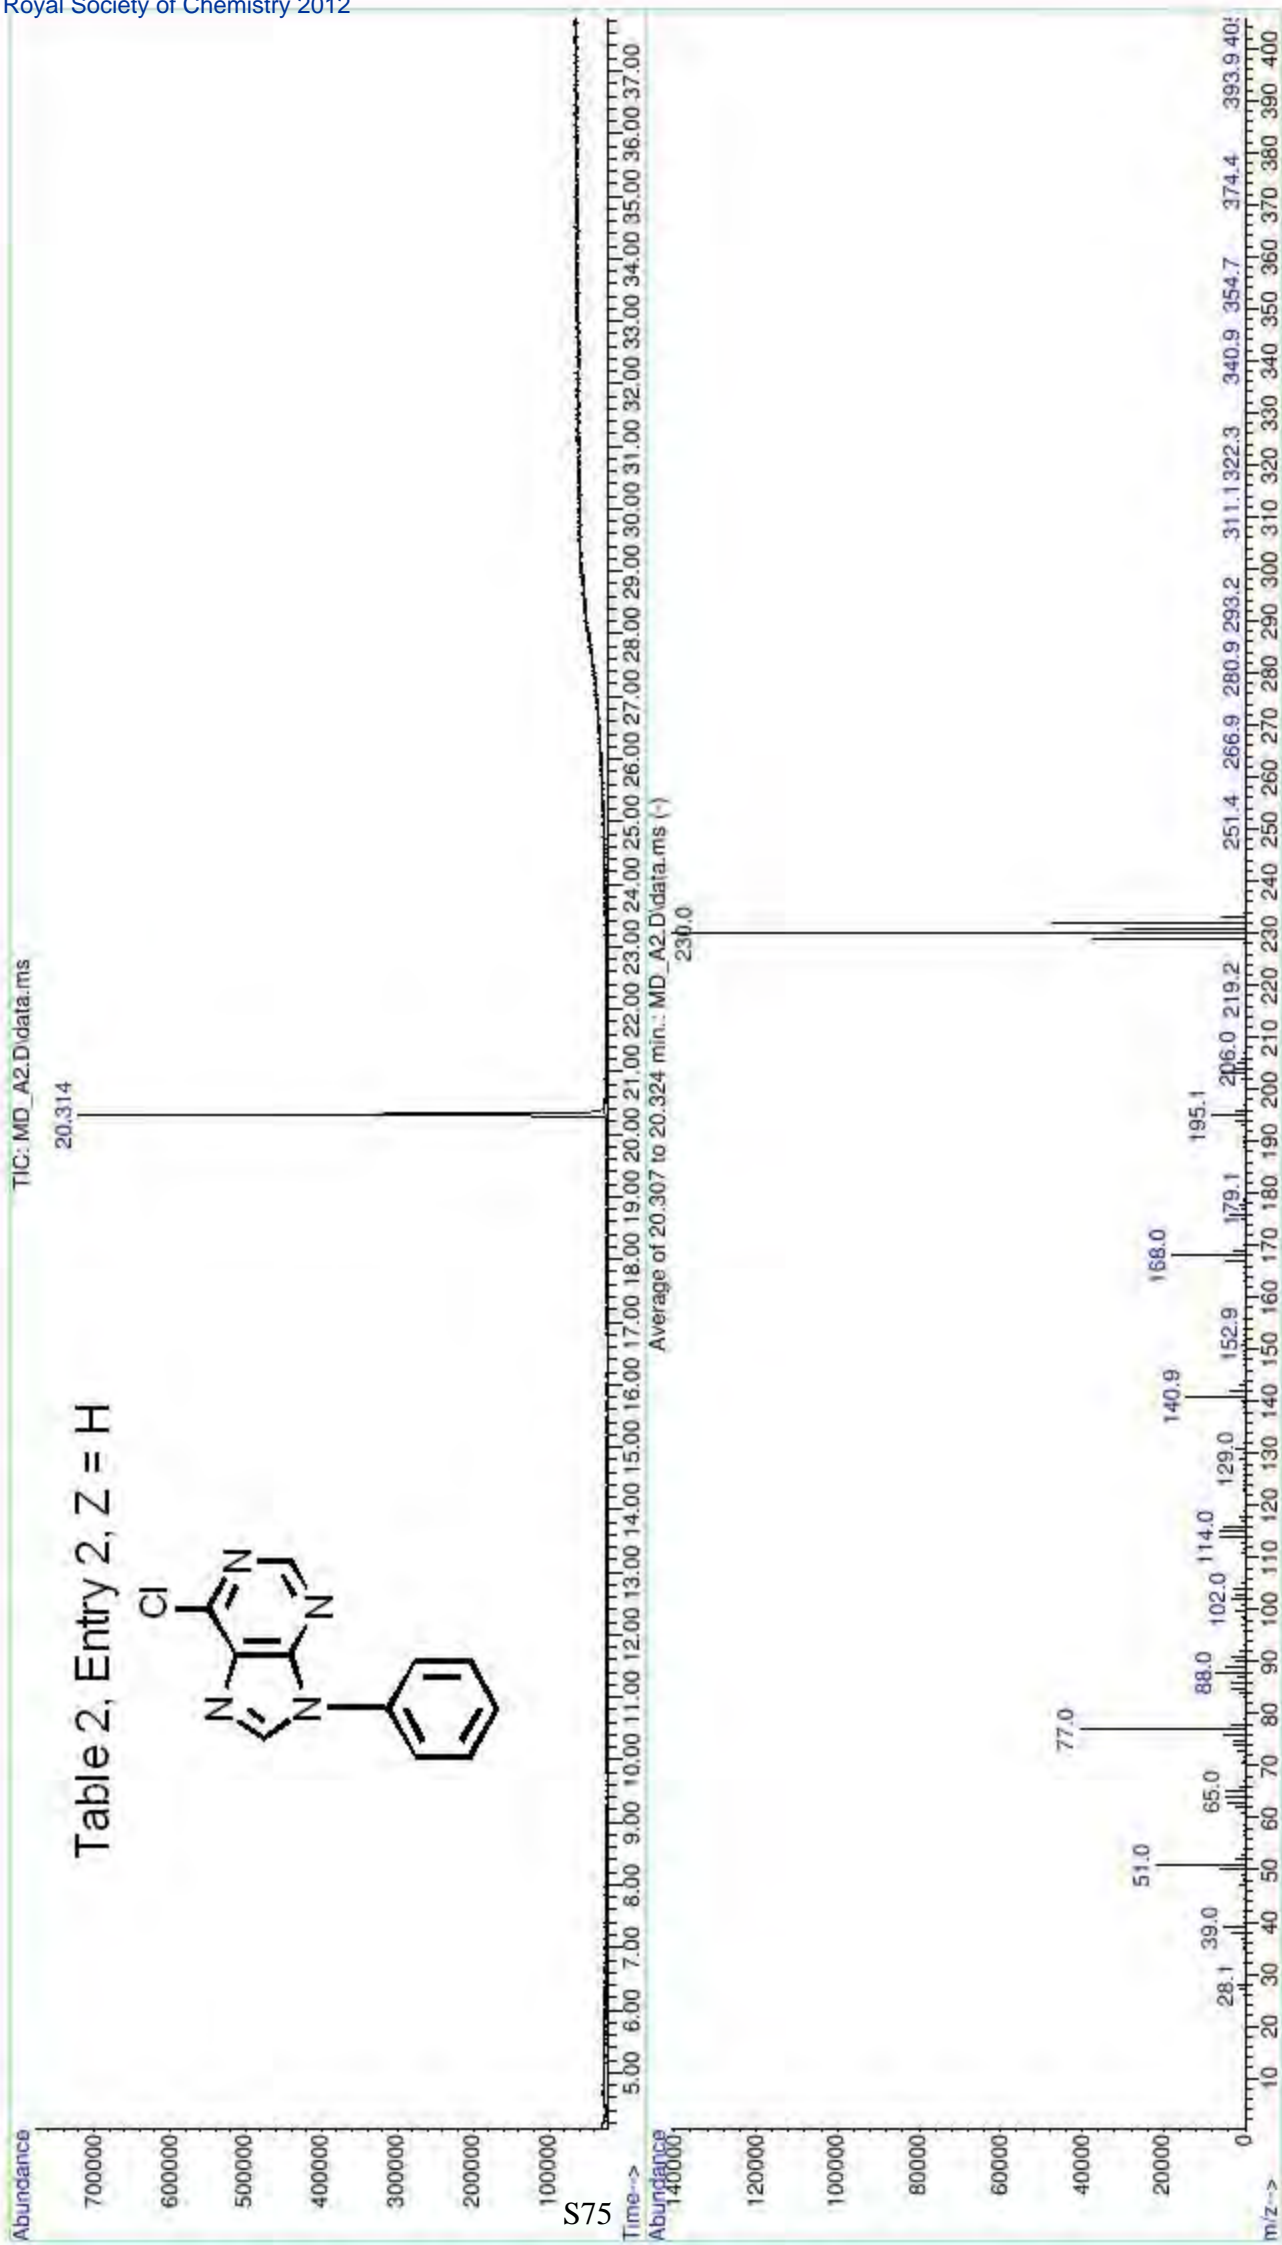

File : D:\Data\MD\_A5.D  
Operator : Dejmek  
Acquired : 1 Mar 2012 21:17  
Instrument : 6890N + 5975B  
Sample Name: MD\_A5  
Misc Info :  
Vial Number: 3

TIC: MD\_A5.D\data.ms

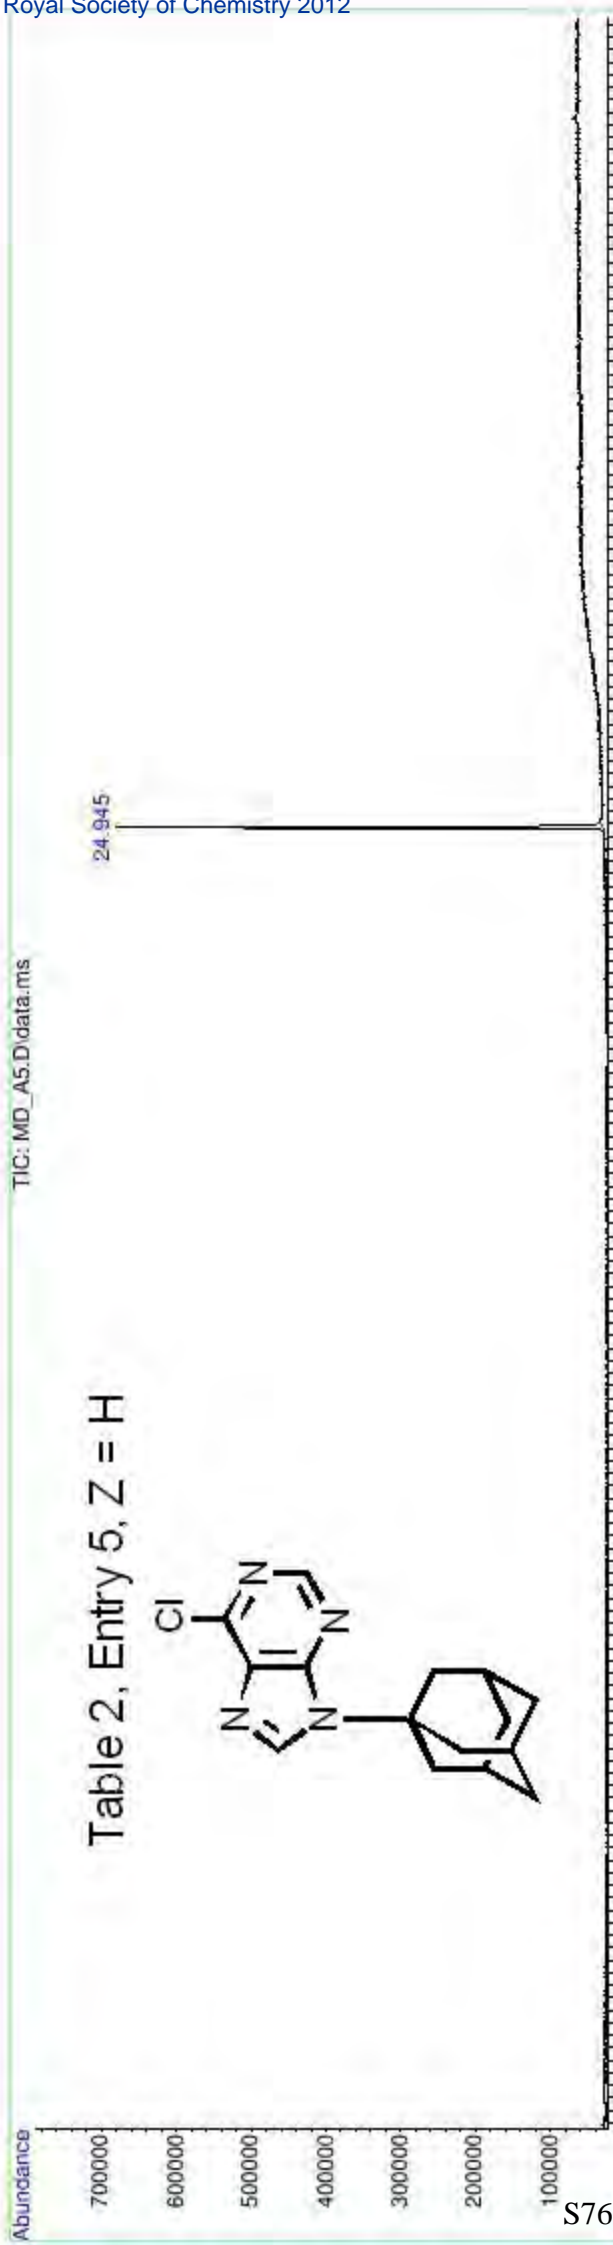

Table 2, Entry 5, Z = H

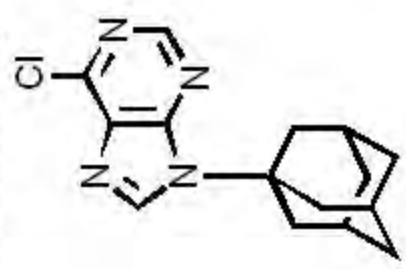

S76

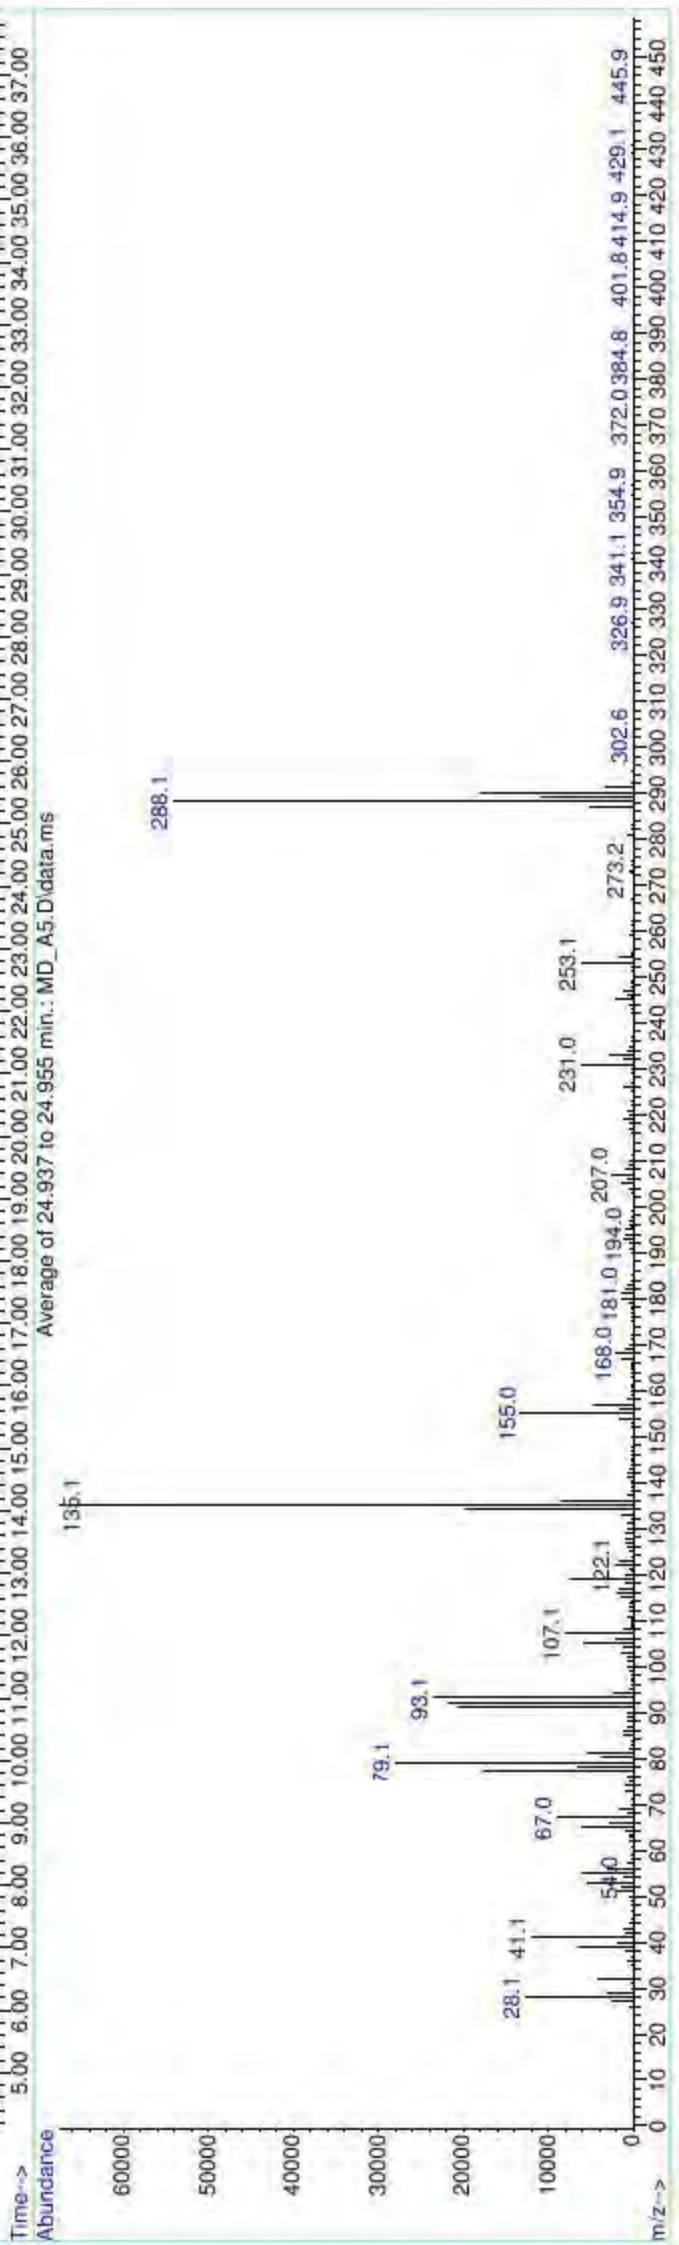

File : D:\Data\MD\_A10.D  
Operator : Dejmek  
Acquired : 1 Mar 2012 22:46  
Instrument : 6890N + 5975B  
Sample Name: MD\_A10  
Misc Info :  
Vial Number: 5

using AcqMethod AS\_M-VYSOKE\_C-VYSOKE.M

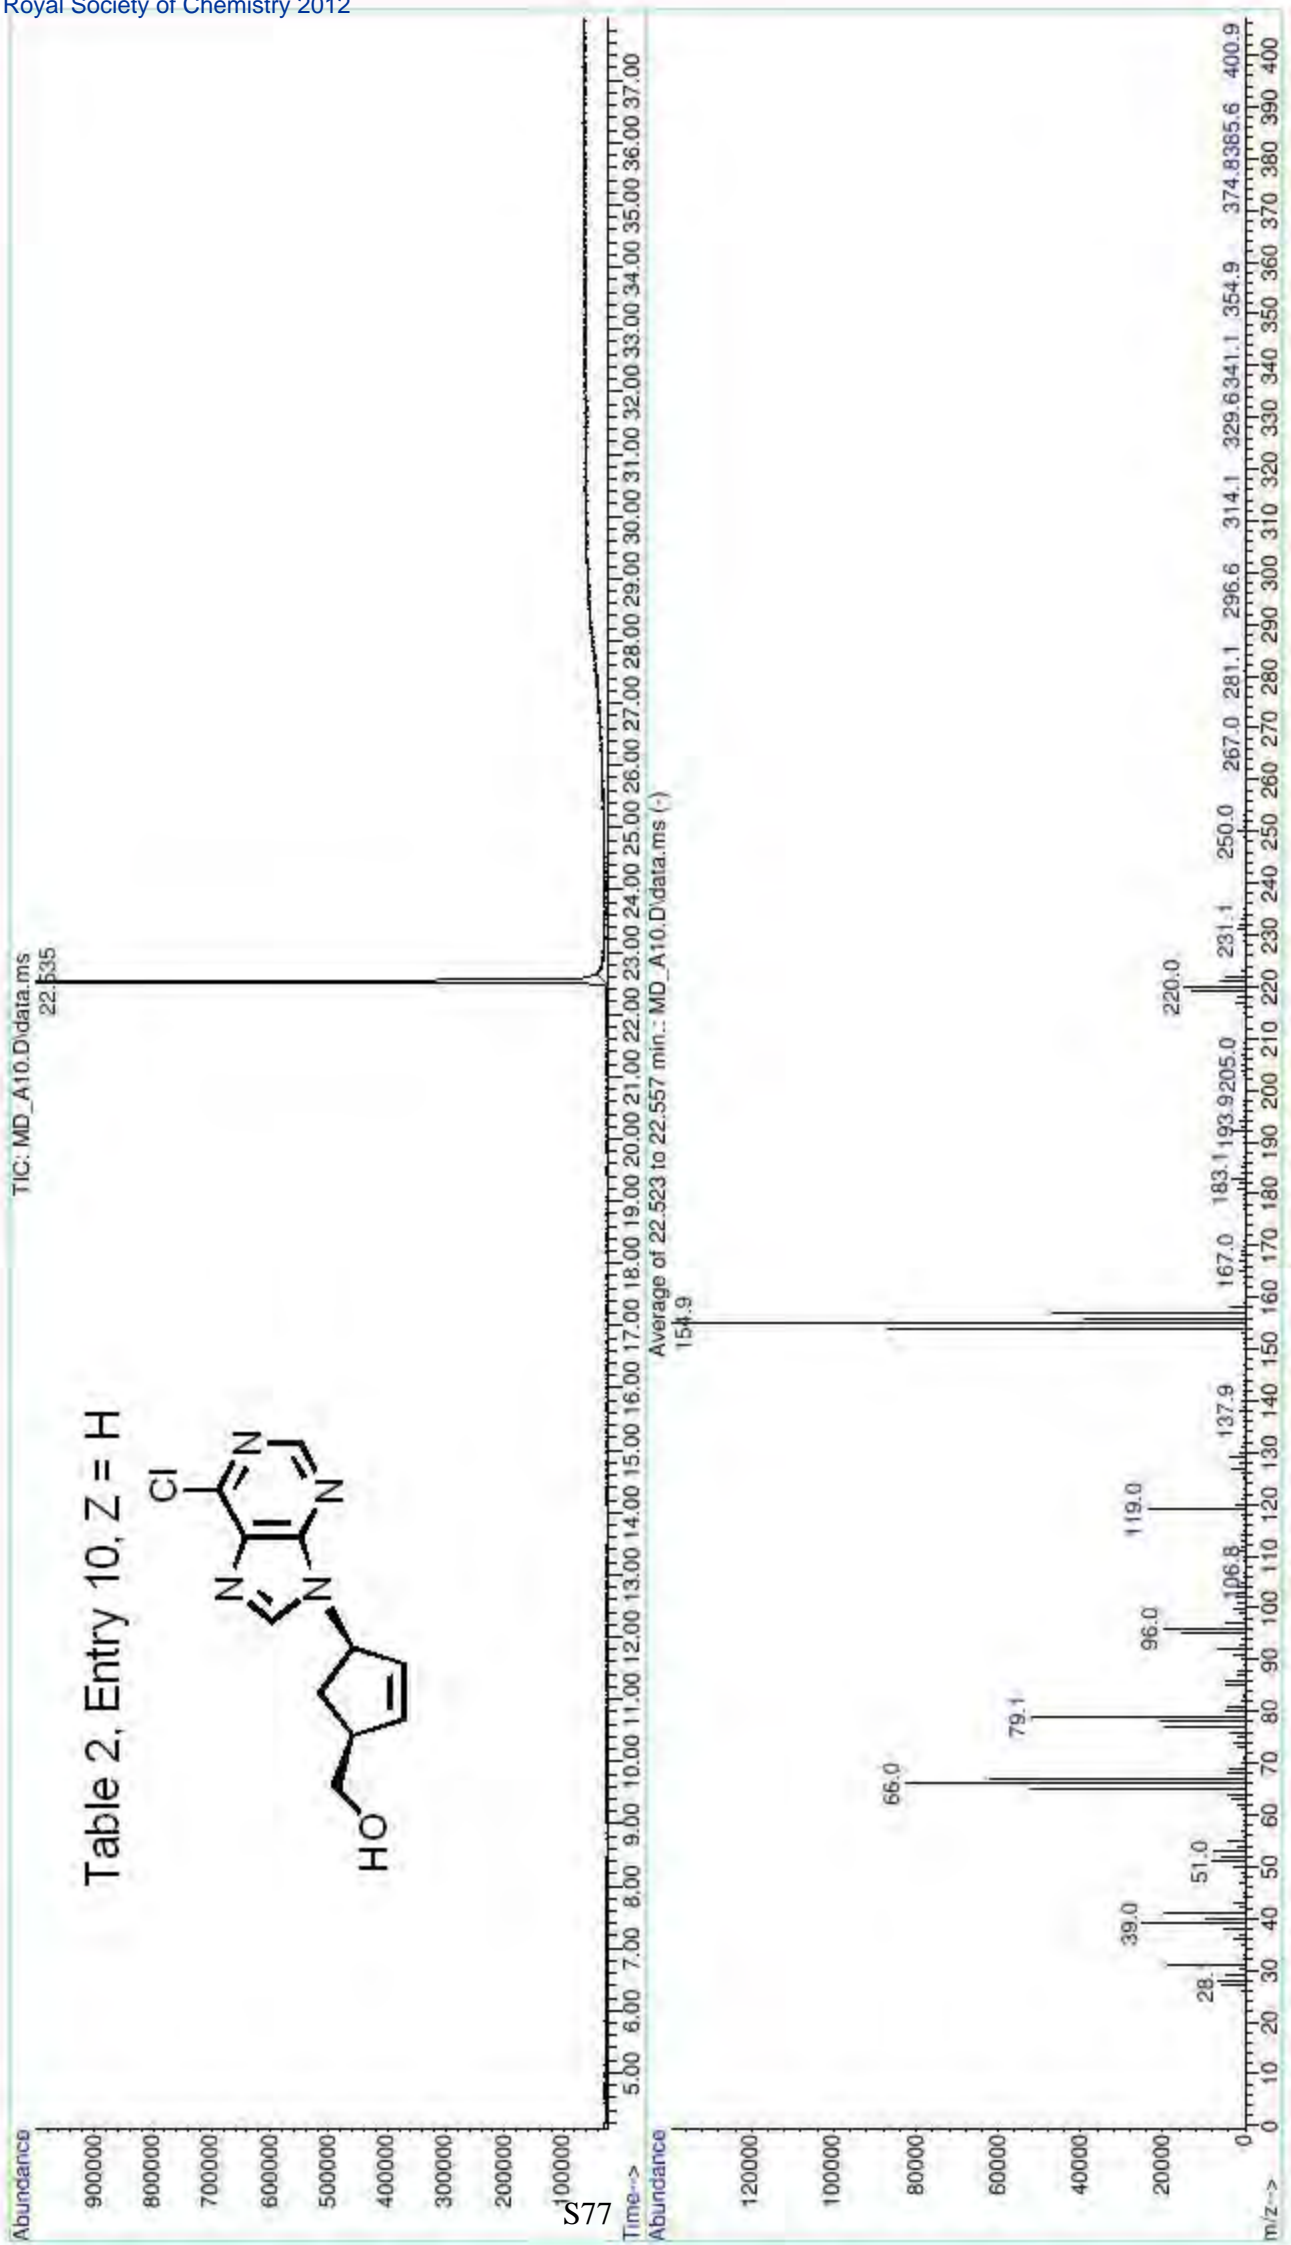

File : D:\Data\MS\_PA9\_cr.D  
Operator : Sala  
Acquired : 7 Mar 2012 14:37  
Instrument : 6890N + 5975B  
Sample Name: MS\_PA9\_cr  
Misc Info :  
Vial Number: 1

using AcqMethod AS\_M-VYSOKE\_C-VYSOKE.M

Table 2, Entry 12, Z = H

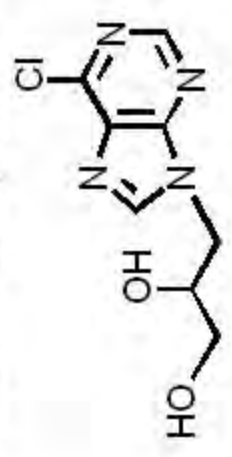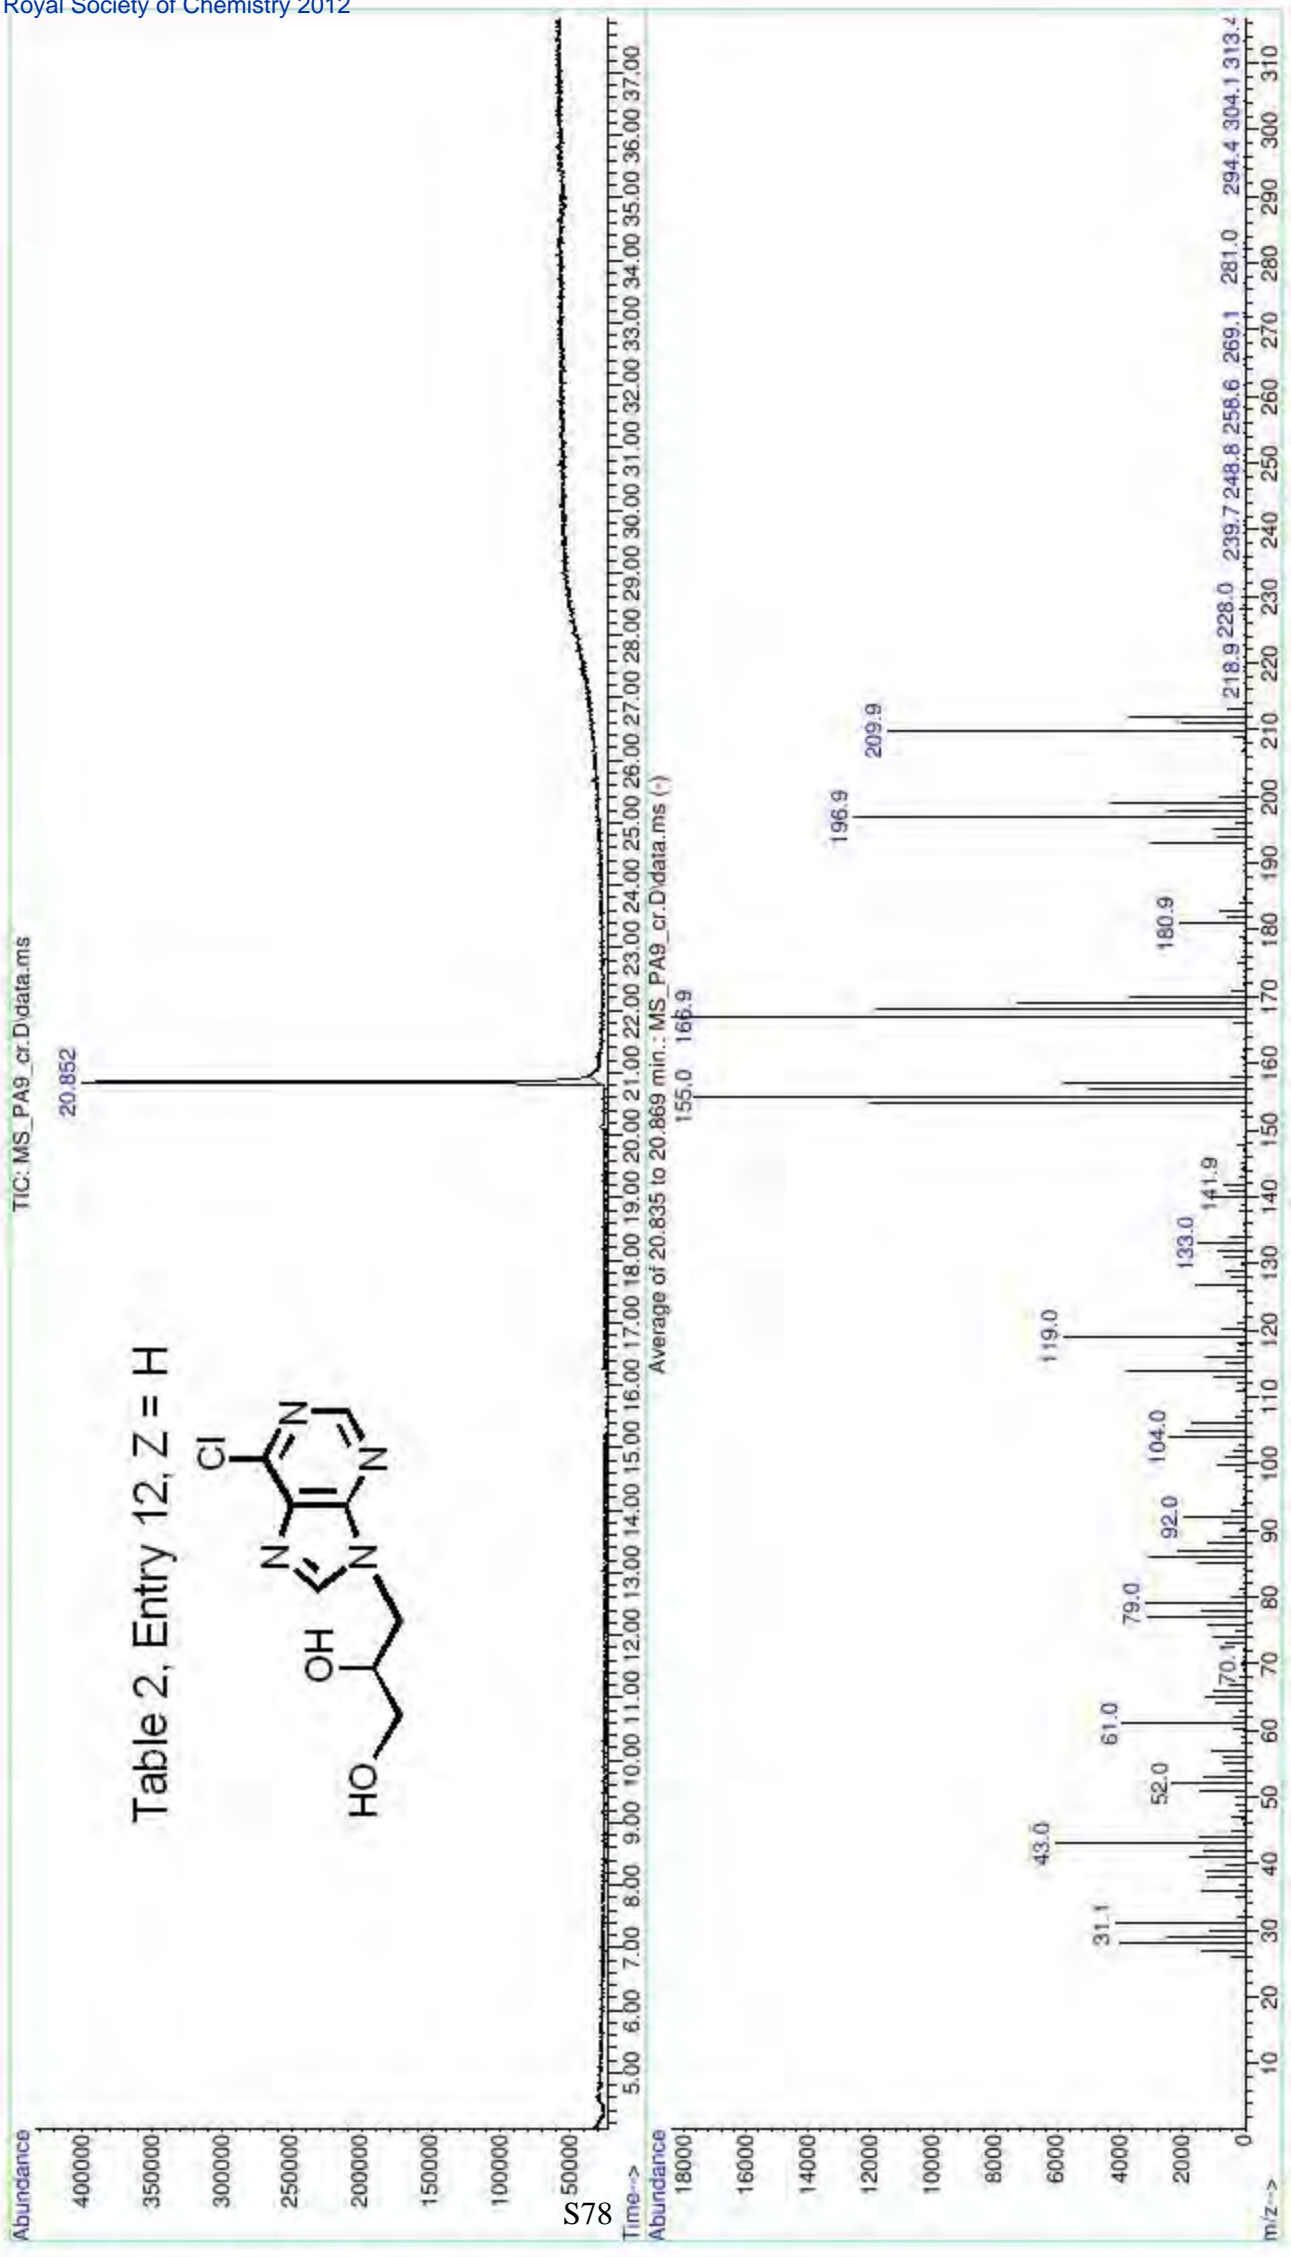

File : D:\Data\MD\_G1.D  
Operator : Dejmek  
Acquired : 1 Mar 2012 17:26 using AcqMethod AS\_M-VYSOKE\_C-VYSOKE.M  
Instrument : 6890N + 5975B  
Sample Name: MD\_G1  
Misc Info :  
Vial Number: 2

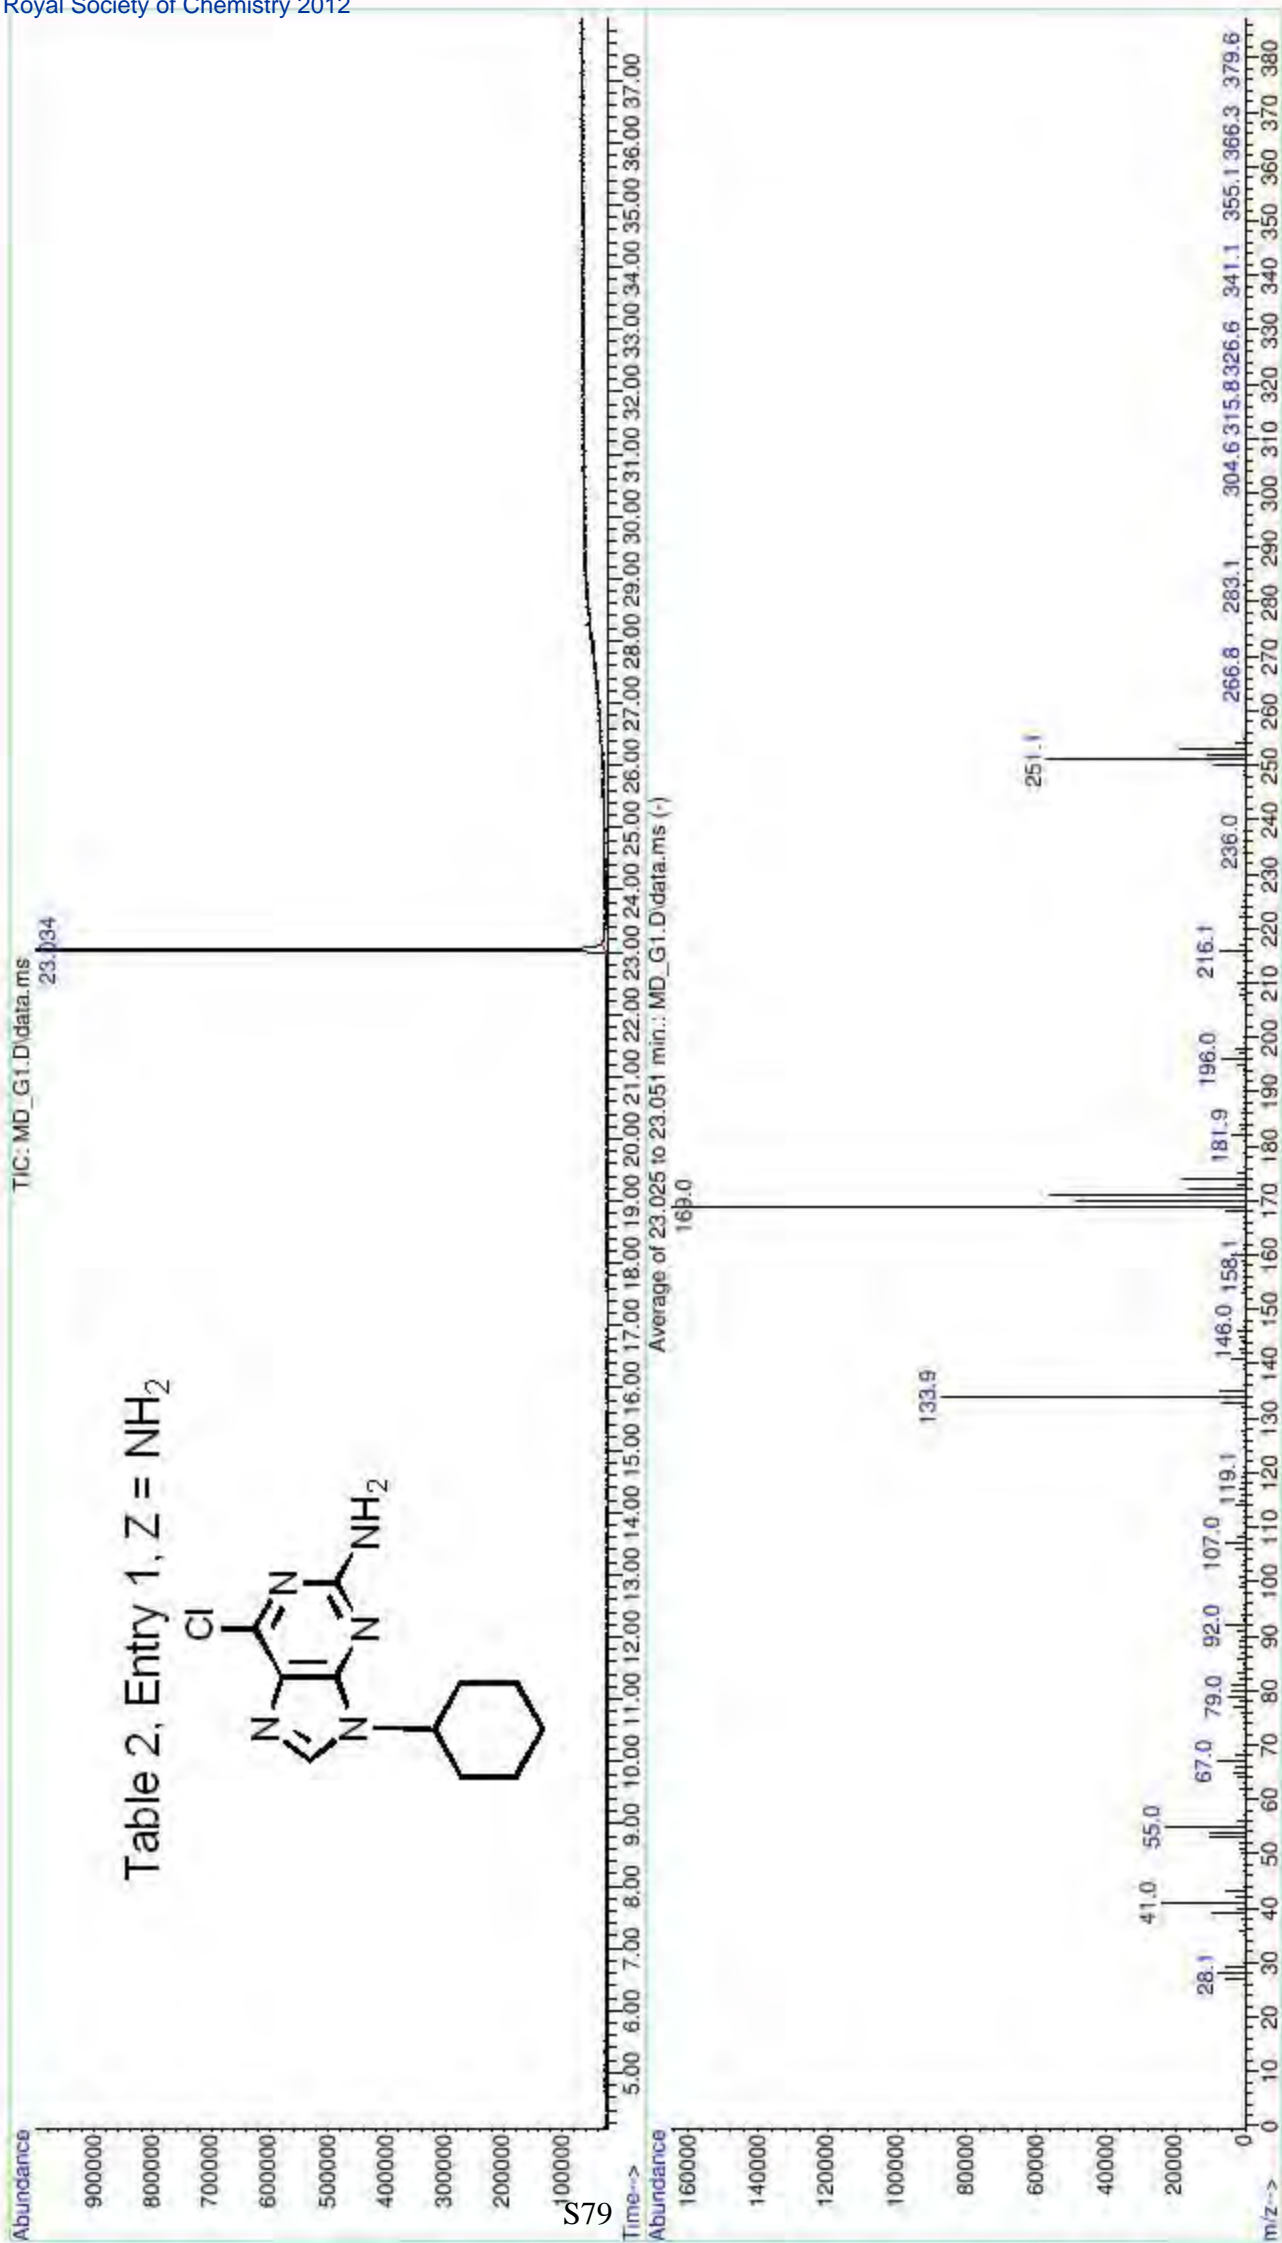

File : D:\Data\MD\_G2-2.D  
Operator : Dejmek  
Acquired : 2 Mar 2012 13:25  
Instrument : 6890N + 5975B  
Sample Name: MD\_G2  
Misc Info :  
Vial Number: 2

using AcqMethod AS\_M-VYSONE\_C-NIZKE.M

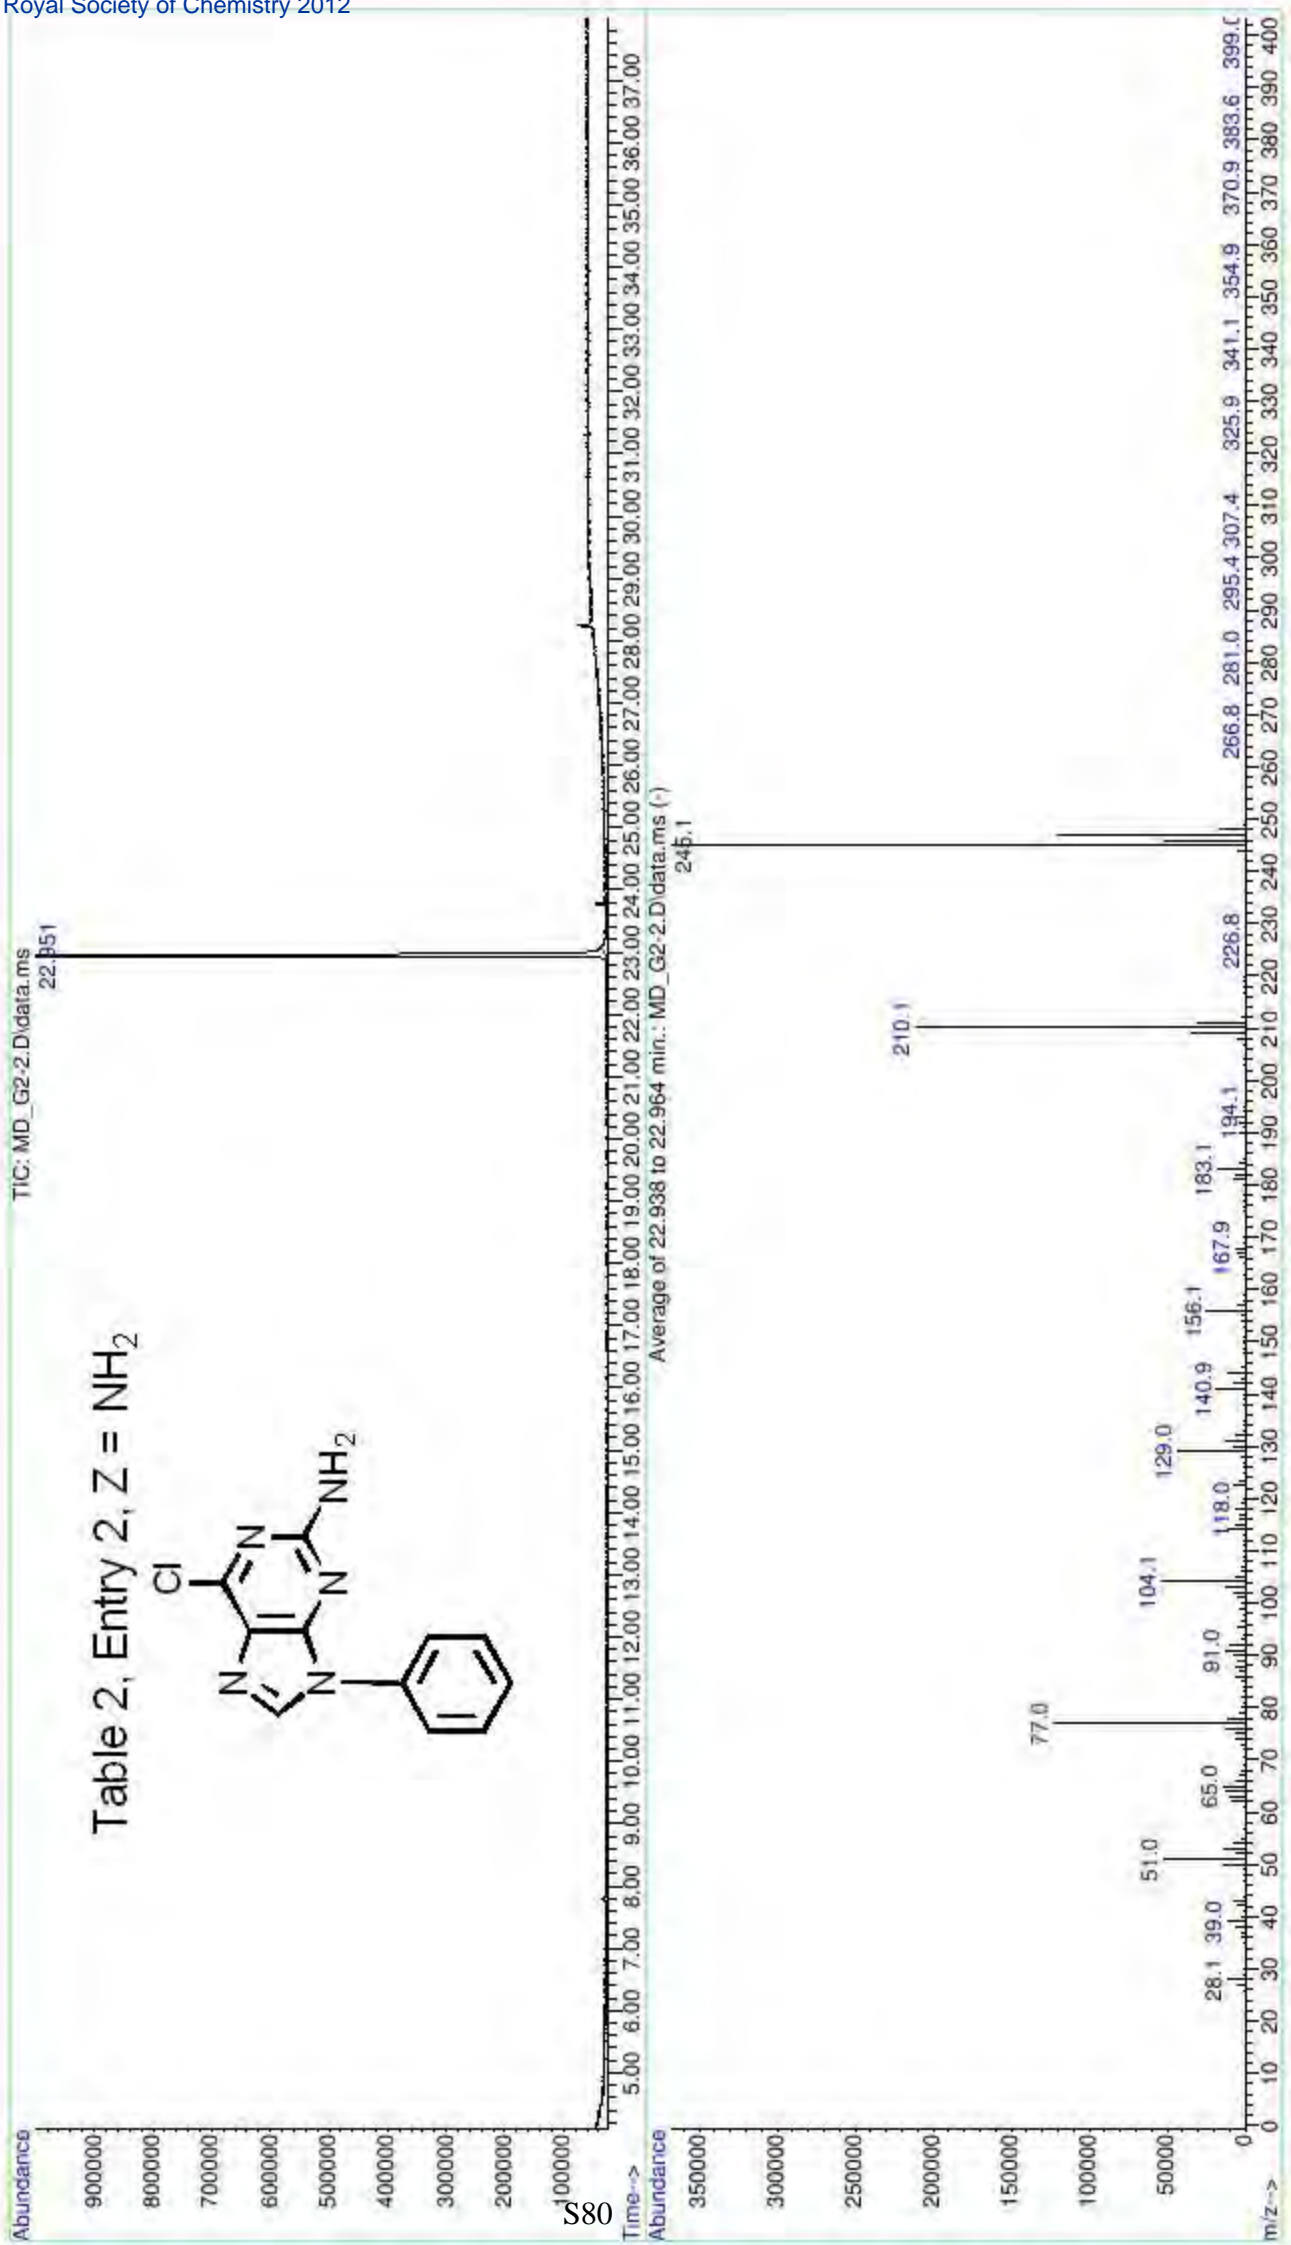



File : D:\Data\MD\_A8.D  
Operator : Dejmek  
Acquired : 1 Mar 2012 22:01  
Instrument : 6890N + 5975B  
Sample Name: MD\_A8  
Misc Info :  
Vial Number: 4

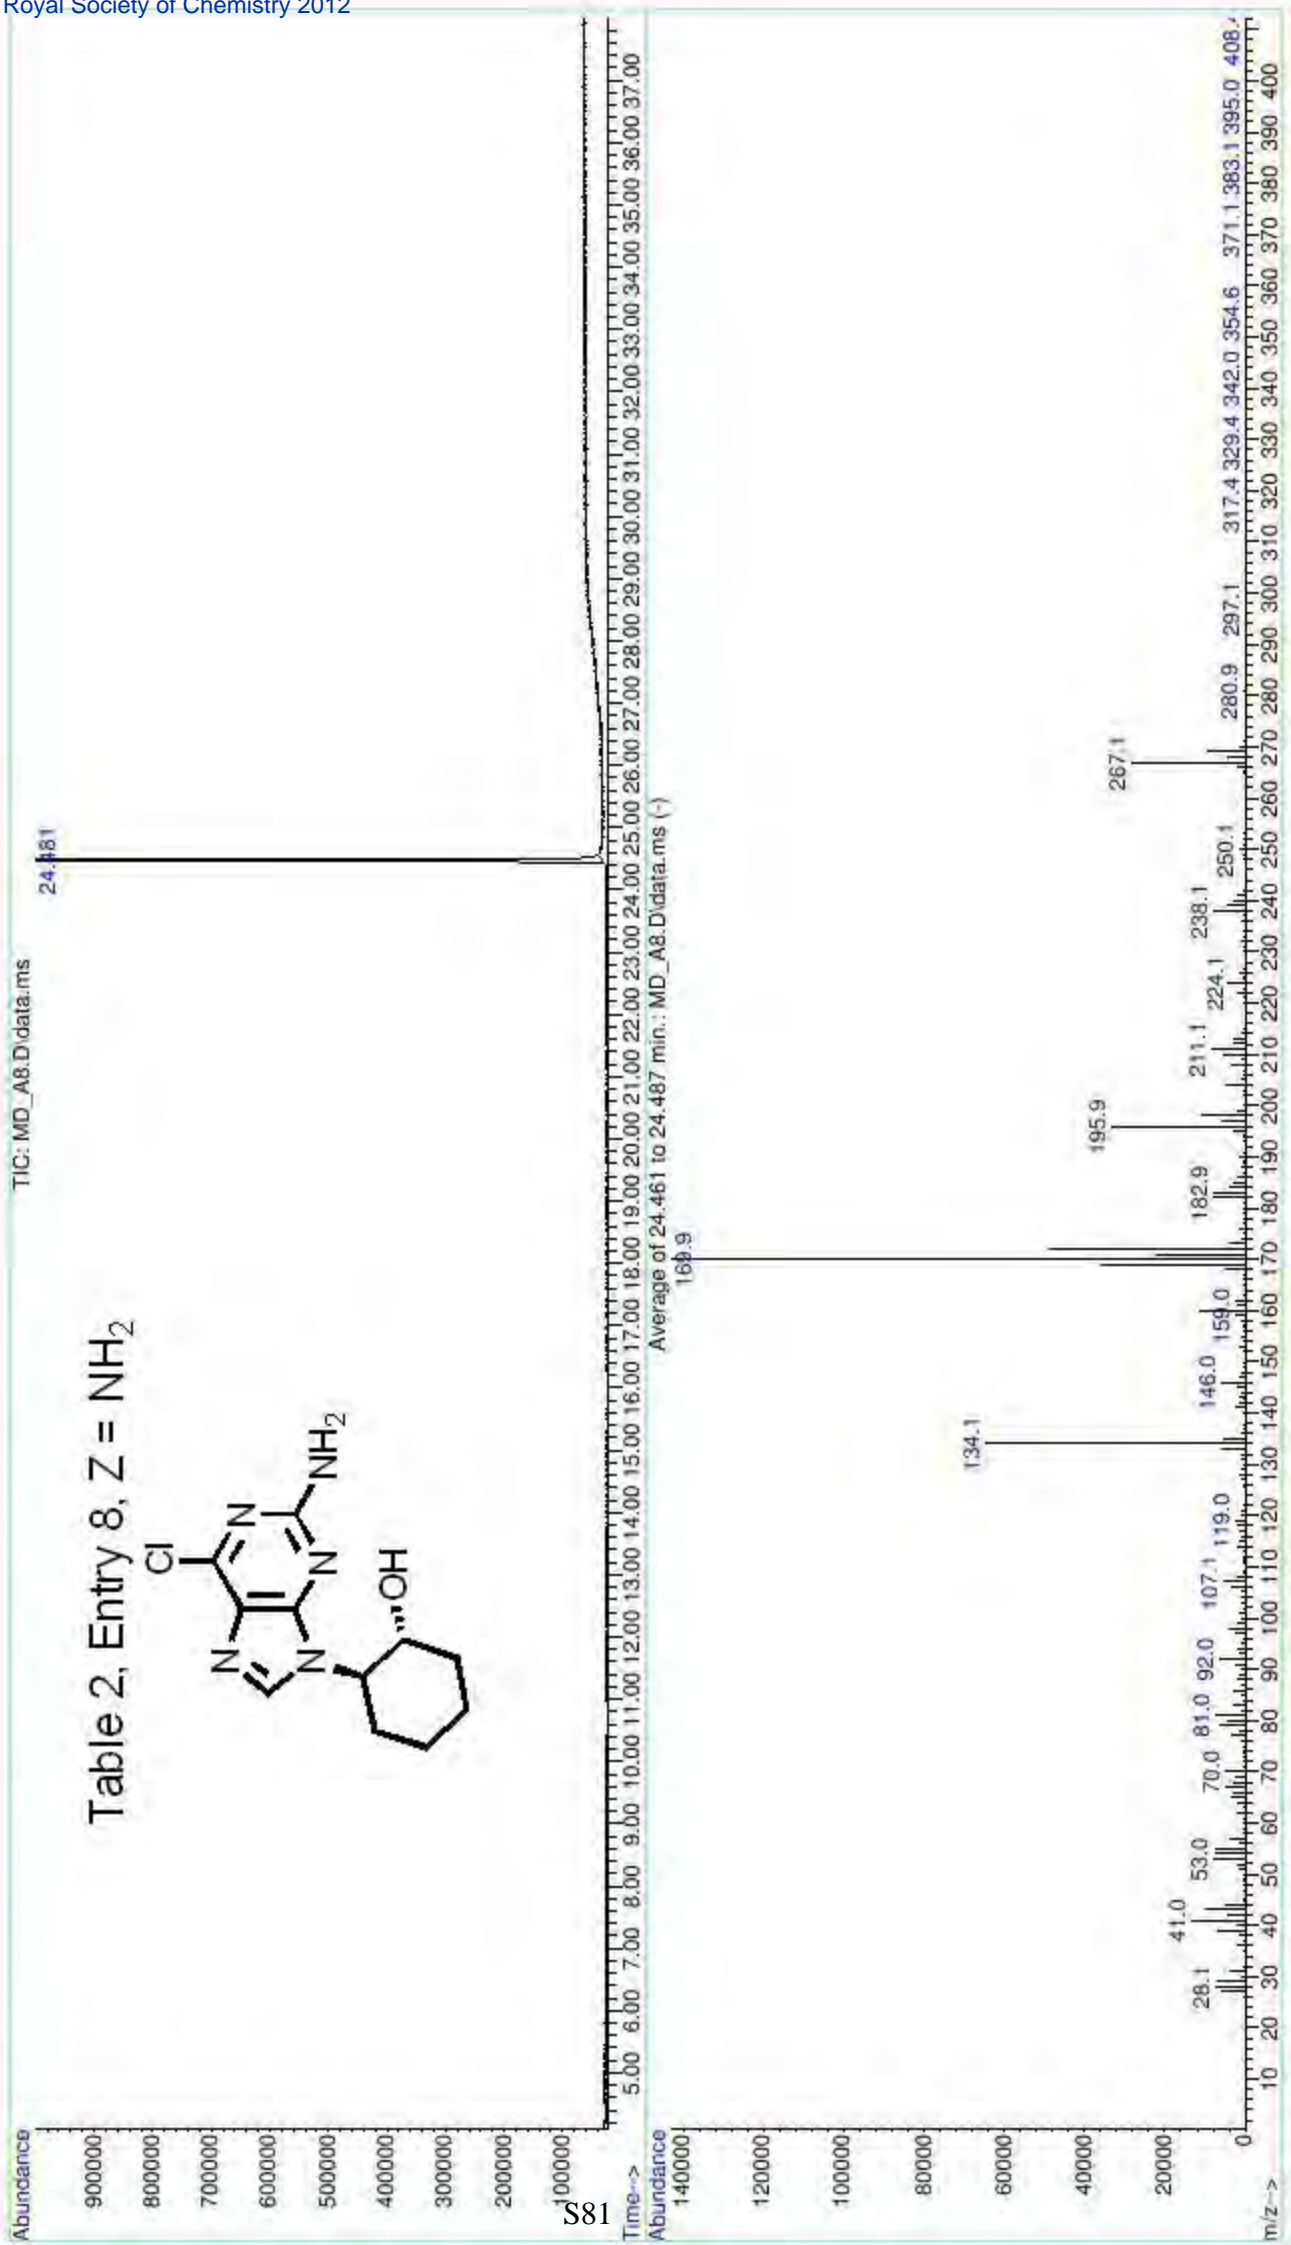

File : D:\Data\MD\_G10.D  
Operator : Dejmek  
Acquired : 1 Mar 2012 18:11  
Instrument : 6890N + 5975B  
Sample Name: MD\_G10  
Misc Info :  
Vial Number: 3

using AcqMethod AS\_M-VYSOKE\_C-VYSOKE.M

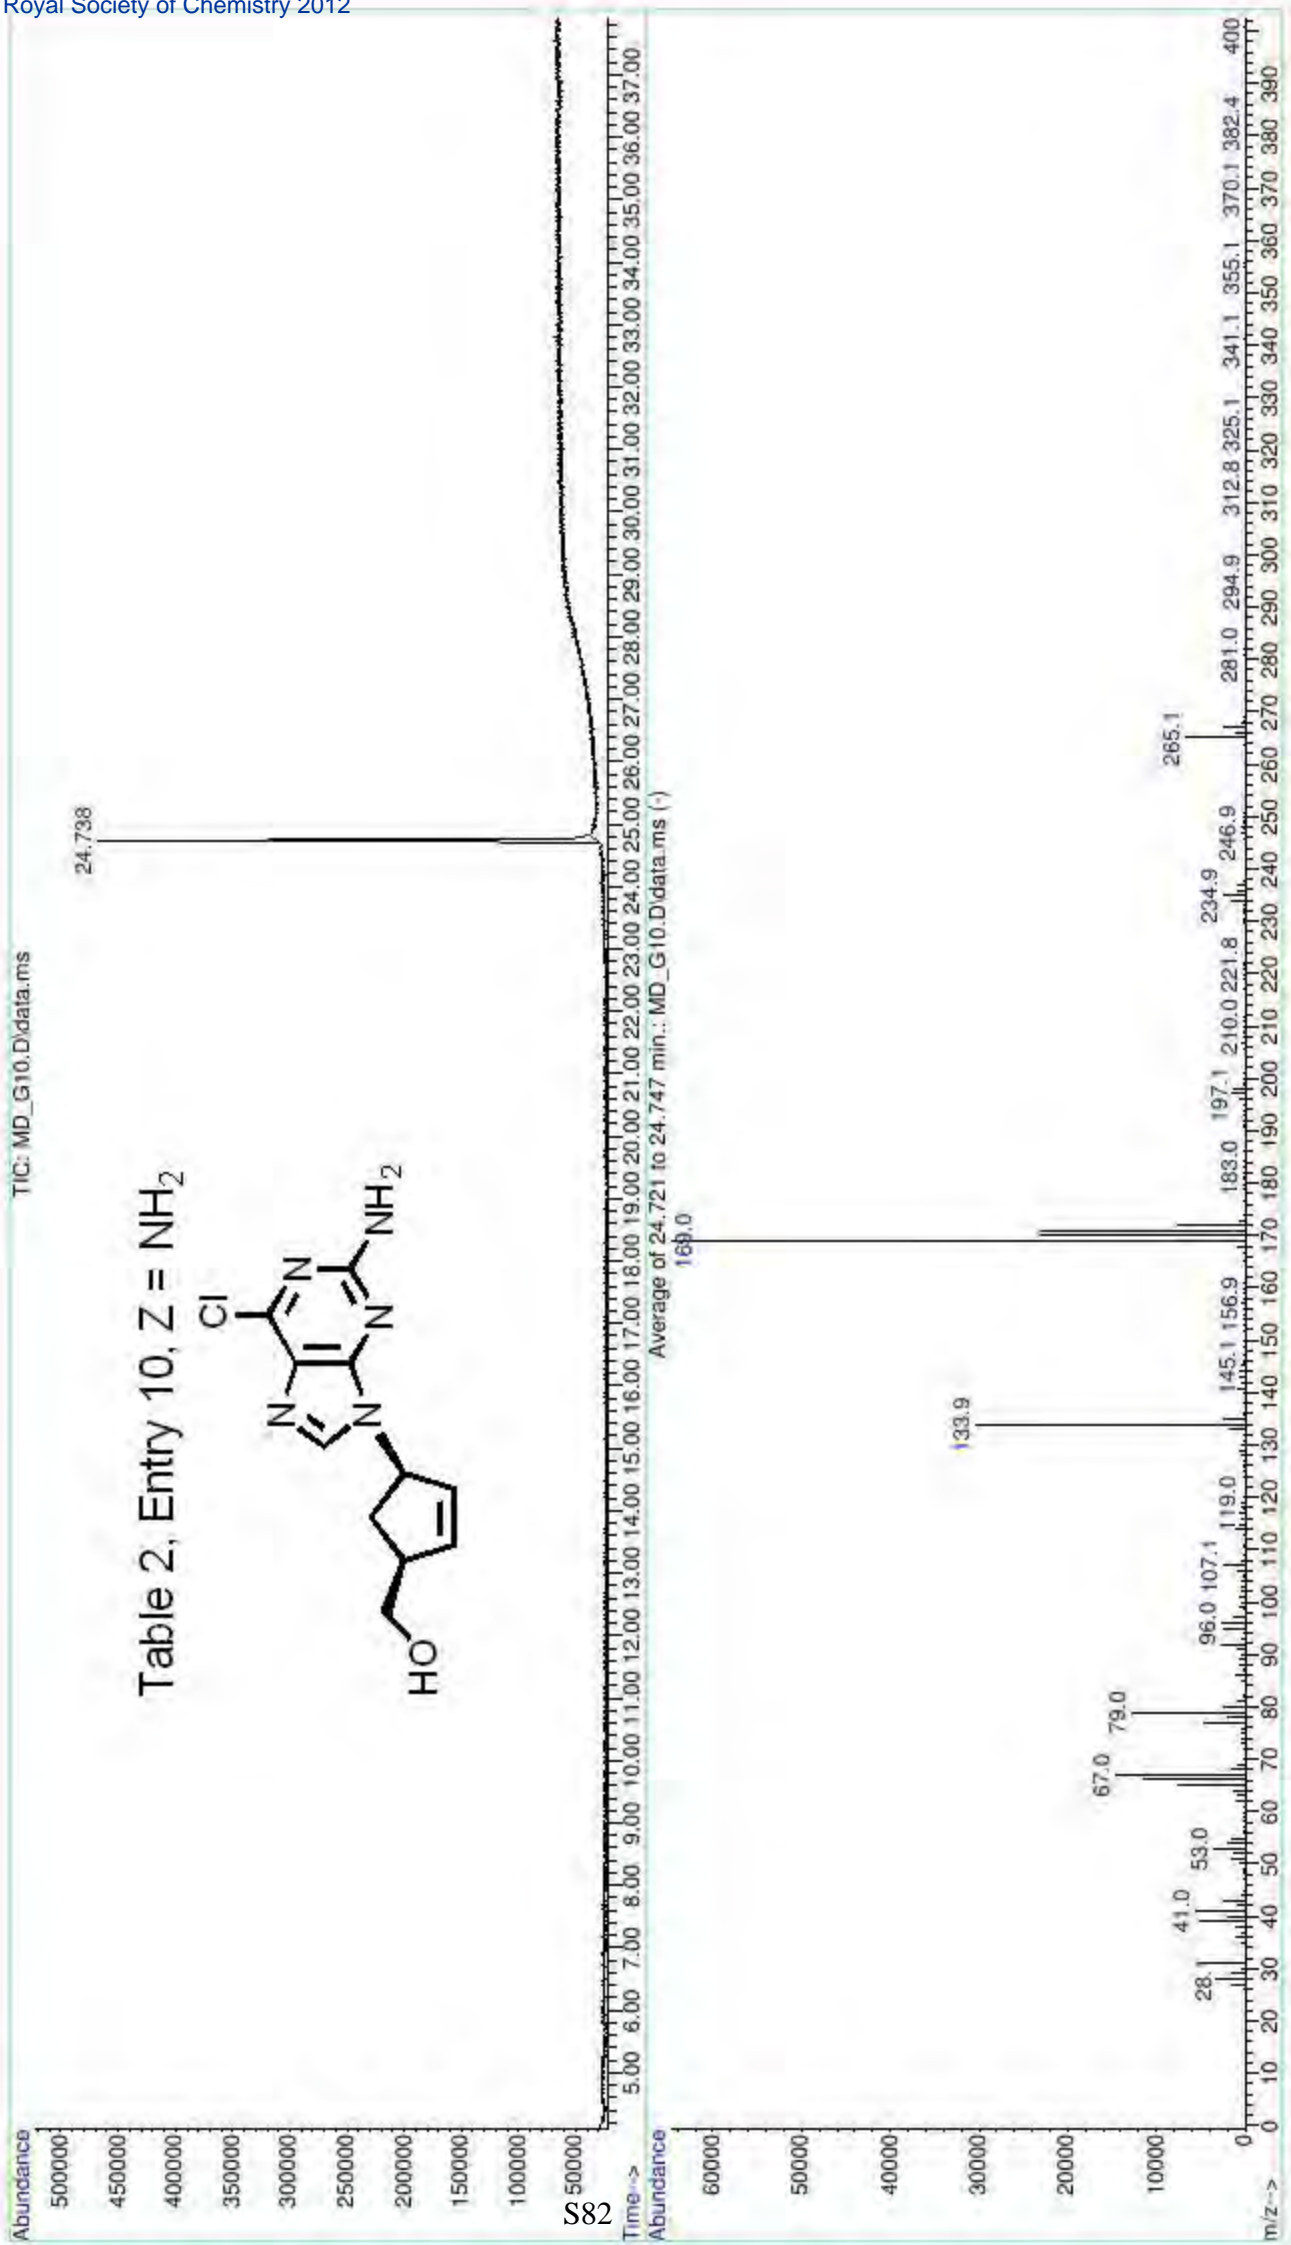

File : D:\Data\MD\_G12-2.D  
Operator : Dejmek  
Acquired : 2 Mar 2012 14:54  
Instrument : 6890N + 5975B  
Sample Name: MD\_G12  
Misc Info :  
Vial Number: 7

using AcqMethod AS\_M-VYSOKE\_C-NIZKE.M

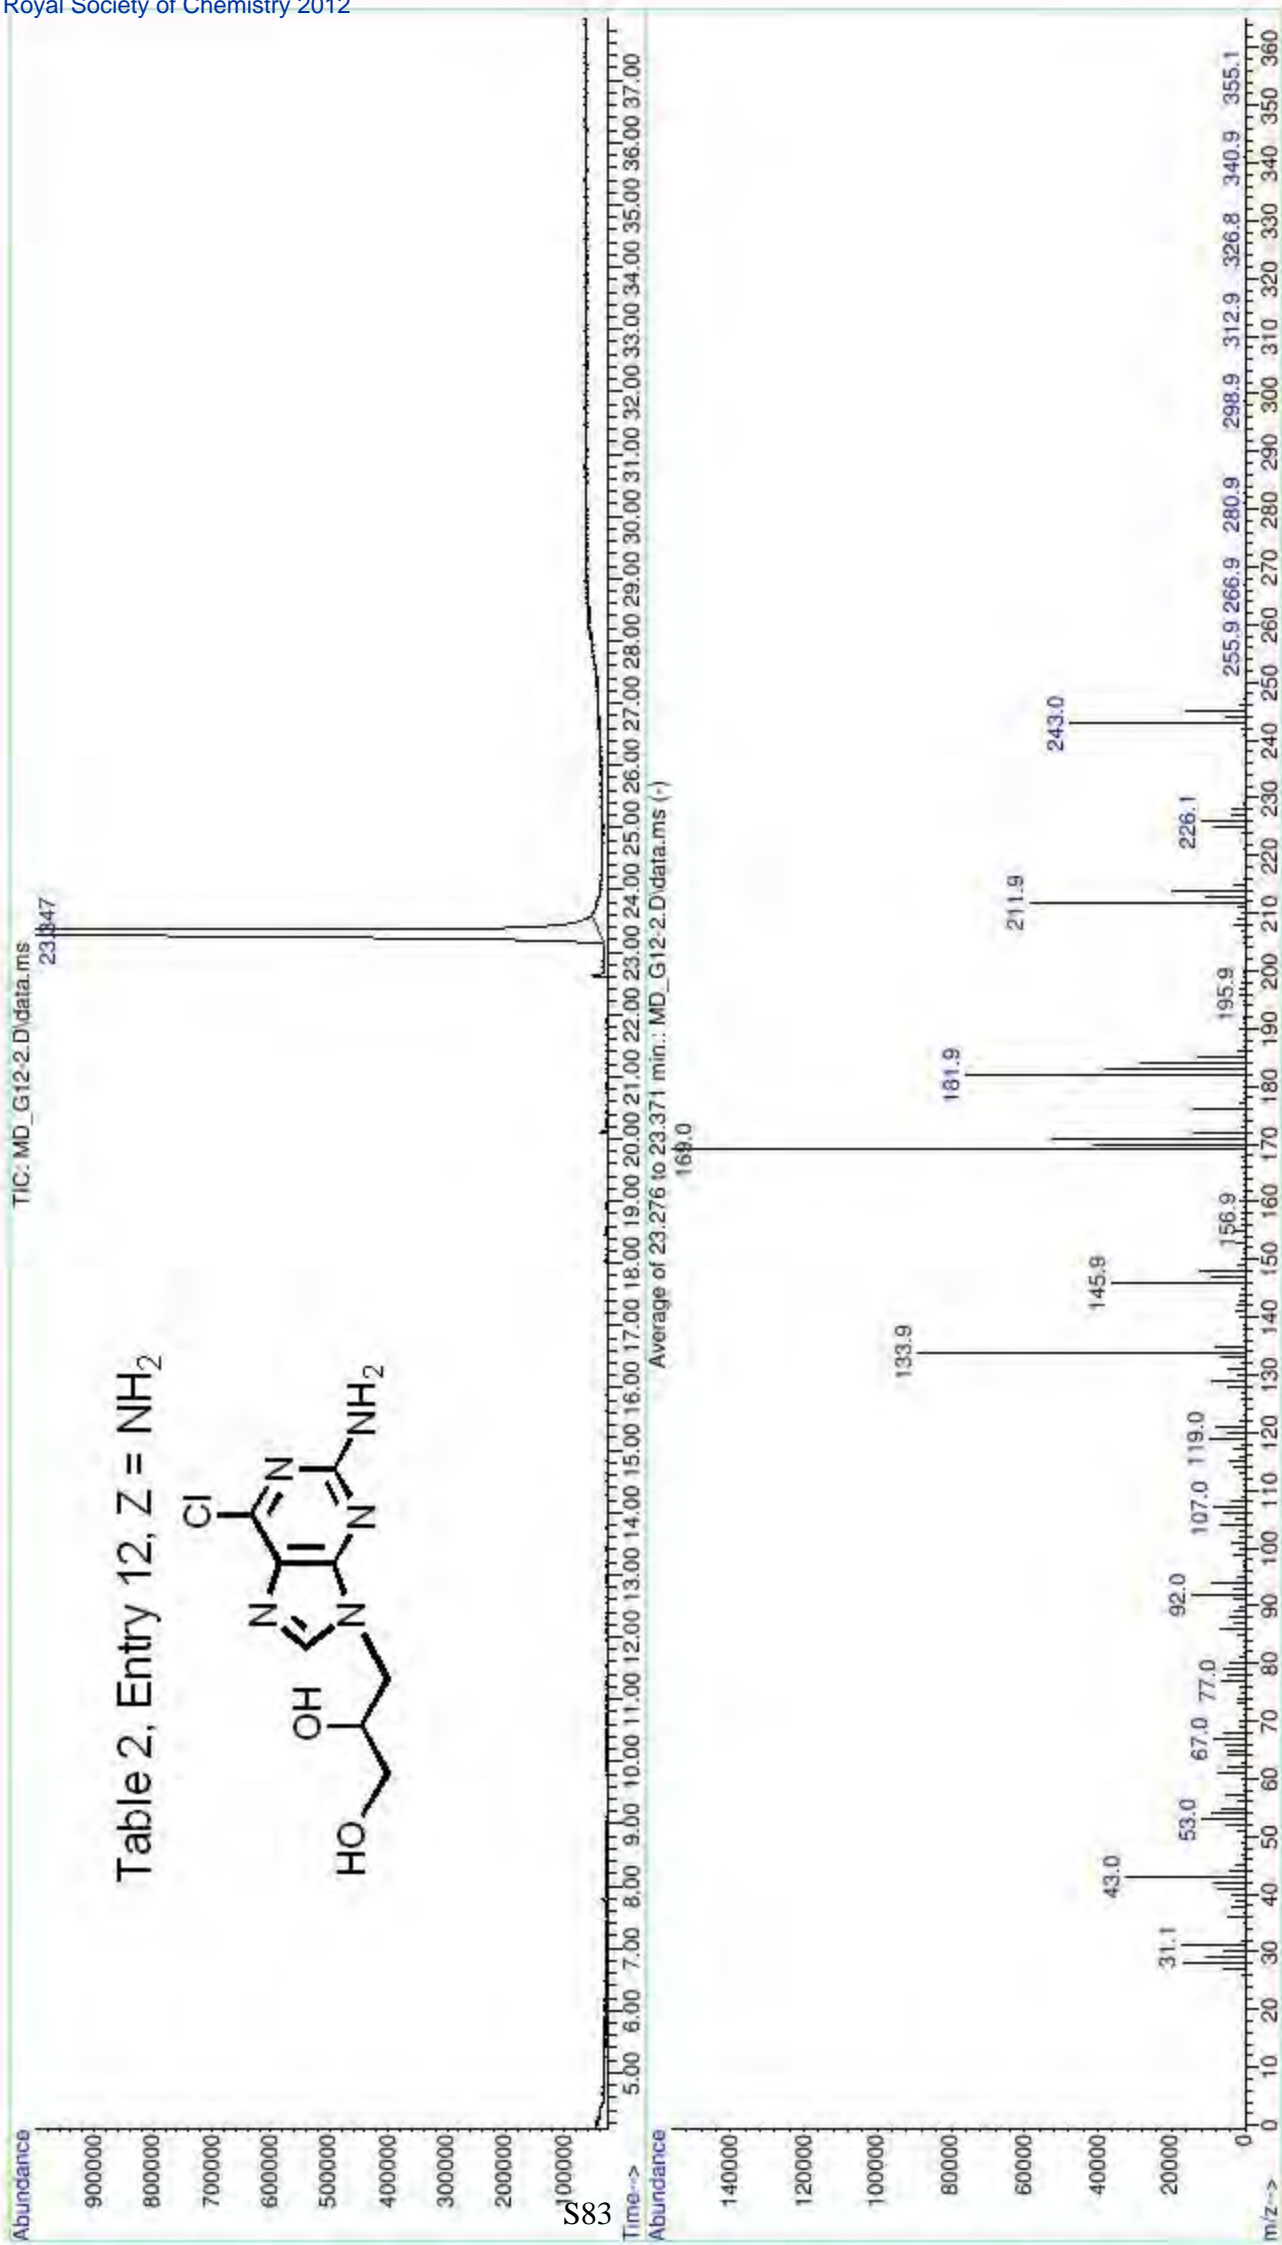

File : D:\Data\MD\_S1-2.D  
Operator : Dejmek  
Acquired : 2 Mar 2012 00:59  
Instrument : 6890N + 5975B  
Sample Name: MD\_S1-2  
Misc Info :  
Vial Number: 8

using AcqMethod AS\_M-VYSOKE\_C-NIZKE.M

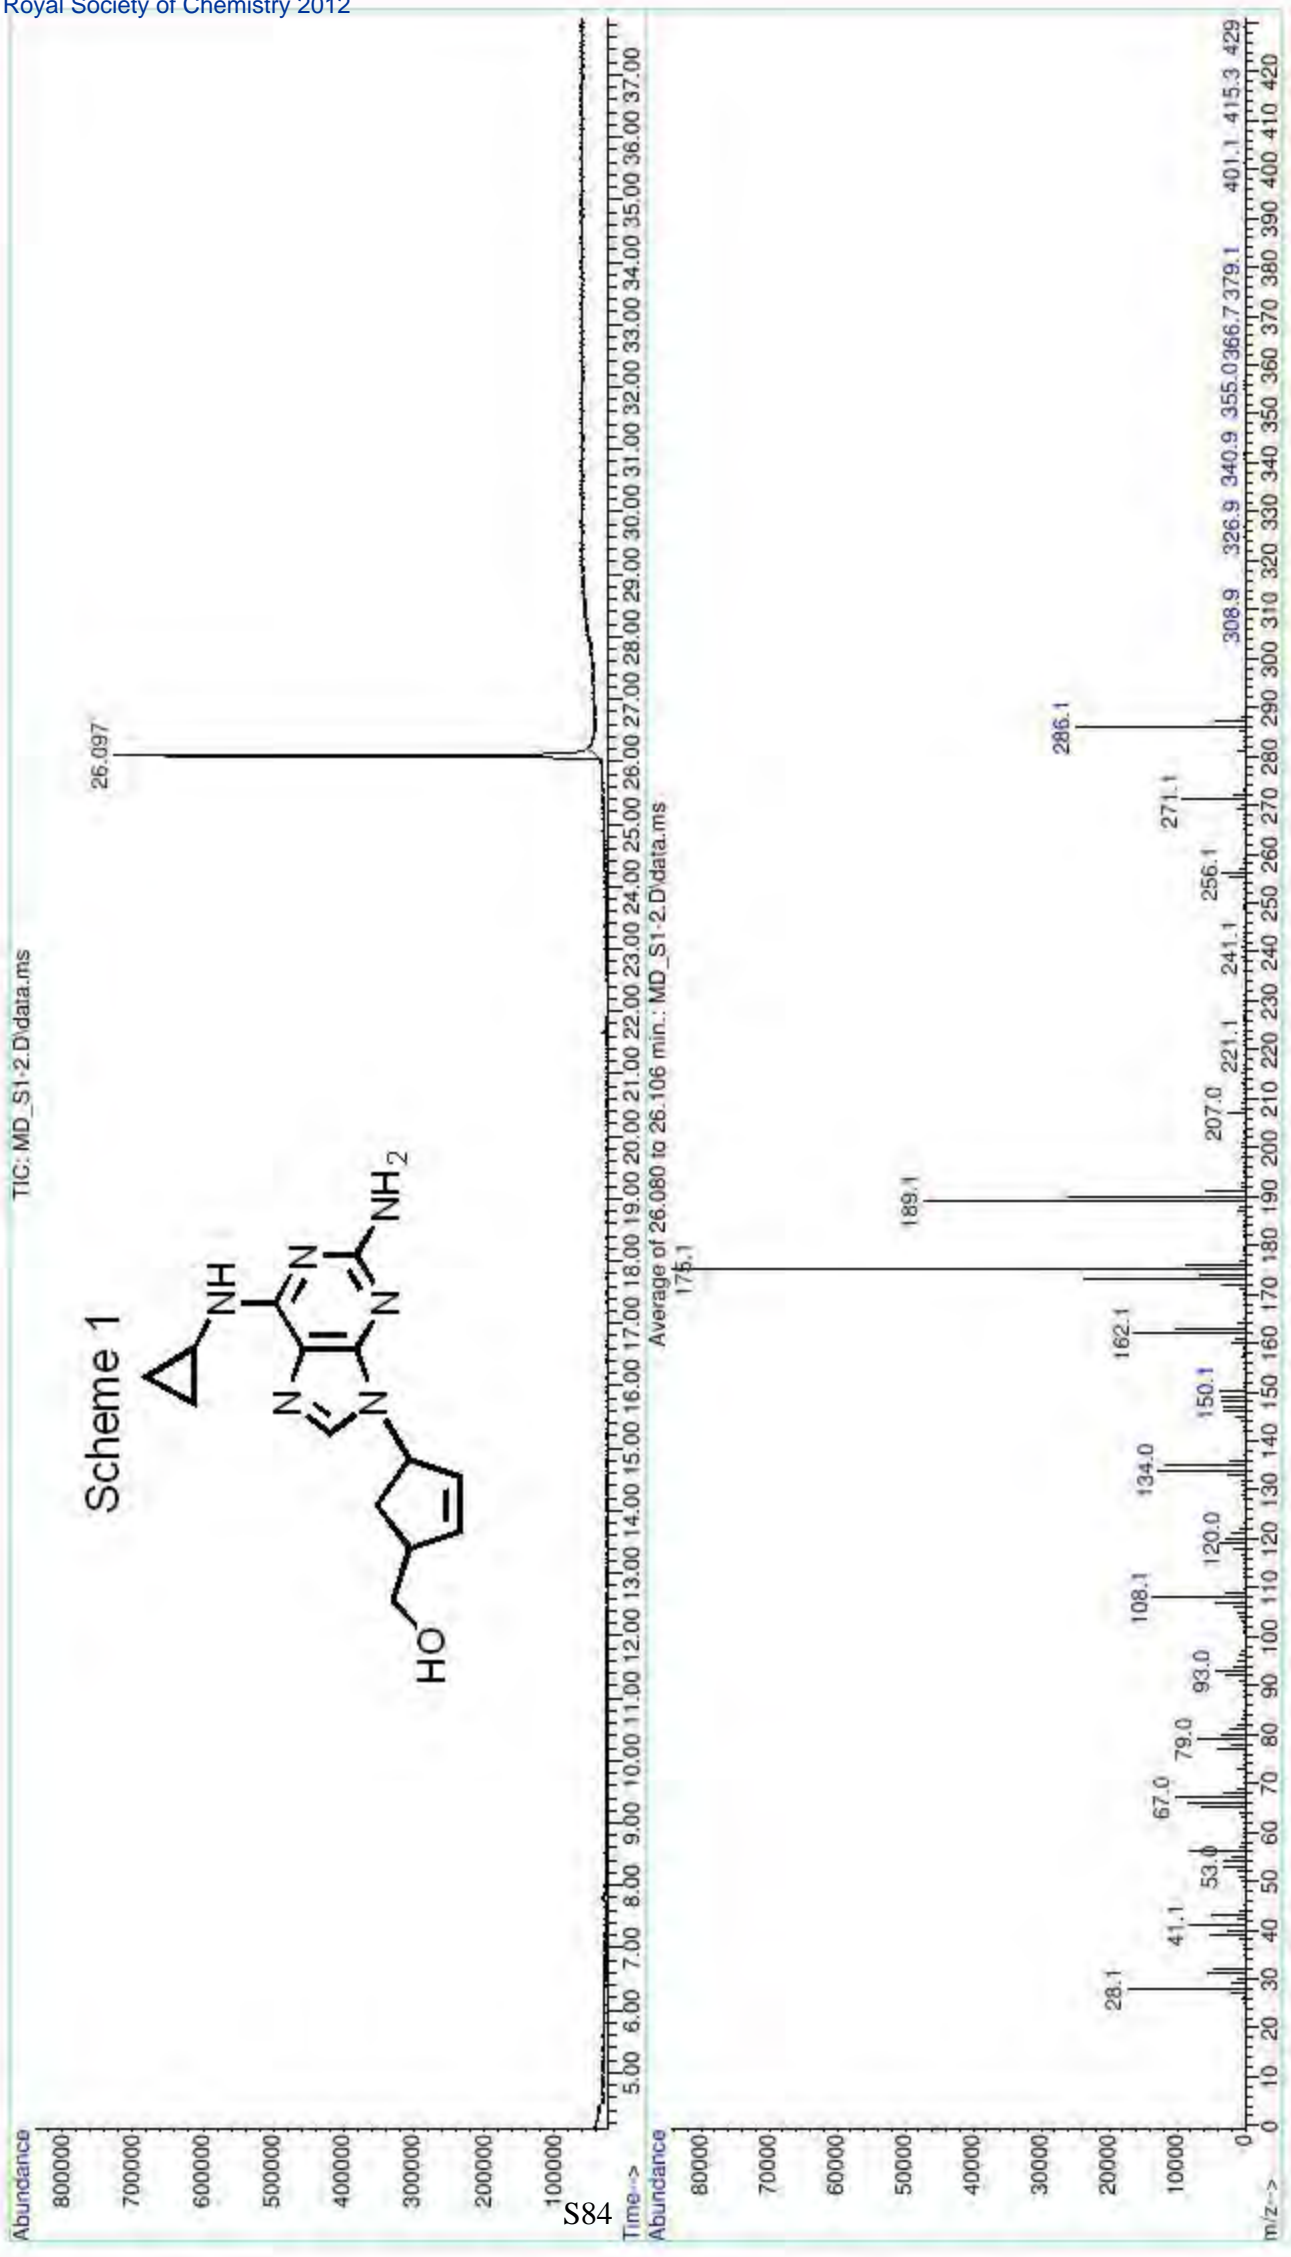

Supplement: c2ra20842c.pdf [file c2ra20842c.pdf]
